# Supplementary material
Source: PubMed Central journal article supplement (PMC6320501)
Supplement: pnas.1811186116.sapp.pdf [file pnas.1811186116.sapp.pdf]

Supporting Information

# **Catalytic Activation of Glycosyl Phosphates for Stereoselective Coupling Reactions**

Samuel M. Levi, Qiuhan Li, Andreas R. Rötheli, and Eric N. Jacobsen\*

*Department of Chemistry and Chemical Biology, Harvard University,  
12 Oxford Street, Cambridge, Massachusetts 02138, United States*

*[jacobsen@chemistry.harvard.edu](mailto:jacobsen@chemistry.harvard.edu)*

## Table of Contents for the Supporting Information

|                                                                                                                      |       |
|----------------------------------------------------------------------------------------------------------------------|-------|
| 1. Procedures, Materials and Instrumentation .....                                                                   | S-5   |
| 1.1 General Procedures.....                                                                                          | S-5   |
| 1.2 Materials.....                                                                                                   | S-5   |
| 1.3 Instrumentation.....                                                                                             | S-5   |
| 1.4 Software.....                                                                                                    | S-6   |
| 1.5 Abbreviations.....                                                                                               | S-6   |
| 2. Synthetic Procedures and Characterization Data.....                                                               | S-7   |
| 2.1 General Procedure for Glycosylation Reactions.....                                                               | S-7   |
| 2.2 Synthetic Procedures and Characterization Data for Previously Unreported Compounds.....                          | S-8   |
| 2.2 Synthetic Procedures and Characterization Data for Previously Reported Compounds.....                            | S-61  |
| 3. X-Ray Crystallographic Structure Analysis .....                                                                   | S-63  |
| 3.1 Catalyst <b>1</b> .....                                                                                          | S-63  |
| 3.2 Galactosyl Phosphate <b>2a</b> .....                                                                             | S-76  |
| 4. Catalyst Evaluation for Glycosyl Phosphate Activation.....                                                        | S-85  |
| 5. Leaving Group Evaluation.....                                                                                     | S-88  |
| 6. Stereospecificity Data.....                                                                                       | S-89  |
| 7. Optimization of Reaction Conditions.....                                                                          | S-91  |
| 8. Studies with Phosphoric Acid Byproduct.....                                                                       | S-94  |
| 9. Inhibition Studies with Glycosyl Chlorides and Macrocyclic Bis-Thiourea Catalyst.....                             | S-95  |
| 9.1 Competition Experiment and Data Analysis.....                                                                    | S-95  |
| 9.2 Experimental Details for Competition Experiment .....                                                            | S-96  |
| 10. Kinetic Analyses of Galactosyl Phosphate ( <b>2a</b> ) and Galactosyl Chloride ( <b>2b</b> ).....                | S-99  |
| 10.1 Preparation of Materials for Kinetic Experiments .....                                                          | S-99  |
| 10.2 General Procedure for Kinetic Experiments .....                                                                 | S-99  |
| 10.3 General Procedure for Sample Collection and HPLC Analysis.....                                                  | S-99  |
| 10.4 Reaction Time-Course with Galactosyl Phosphate ( <b>2a</b> ) and <i>L</i> -Ser ( <b>3a</b> ) .....              | S-100 |
| 10.5 Michaelis-Menten Kinetic Analysis with Galactosyl Phosphate ( <b>2a</b> ) and <i>L</i> -Ser ( <b>3a</b> ) ..... | S-102 |
| 10.6 Reaction Time-Course with Galactosyl Chloride ( <b>2b</b> ) and <i>L</i> -Ser ( <b>3a</b> ) .....               | S-108 |
| 10.7 Michaelis-Menten Kinetic Analysis with Galactosyl Chloride ( <b>2b</b> ) and <i>L</i> -Ser ( <b>3a</b> ) .....  | S-110 |
| 11. Competition Experiment with Galactosyl Chloride ( <b>2b</b> ) and Galactosyl Phosphate ( <b>2a</b> ) .....       | S-115 |
| 12. Substrate Binding Experiment .....                                                                               | S-120 |
| 12.1 Galactosyl Phosphate ( <b>2a</b> ) Binding with Catalyst <b>1</b> .....                                         | S-120 |
| 12.2 Galactosyl Chloride ( <b>2b</b> ) Binding with Catalyst <b>1</b> .....                                          | S-125 |
| 12.3 <i>L</i> -Ser ( <b>3a</b> ) Binding with Catalyst <b>1</b> .....                                                | S-128 |
| 12.4 Leaving Group Binding Study .....                                                                               | S-131 |

### List of Figures

|                  |       |
|------------------|-------|
| Figure S1 .....  | S-75  |
| Figure S2 .....  | S-75  |
| Figure S3 .....  | S-84  |
| Figure S4 .....  | S-84  |
| Figure S5 .....  | S-96  |
| Figure S6 .....  | S-98  |
| Figure S7 .....  | S-101 |
| Figure S8 .....  | S-102 |
| Figure S9 .....  | S-102 |
| Figure S10 ..... | S-104 |
| Figure S11 ..... | S-106 |
| Figure S12 ..... | S-109 |
| Figure S13 ..... | S-111 |
| Figure S14 ..... | S-114 |
| Figure S15 ..... | S-115 |
| Figure S16 ..... | S-117 |
| Figure S17 ..... | S-118 |
| Figure S18 ..... | S-118 |
| Figure S19 ..... | S-122 |
| Figure S20 ..... | S-123 |
| Figure S21 ..... | S-124 |
| Figure S22 ..... | S-126 |
| Figure S23 ..... | S-127 |
| Figure S24 ..... | S-129 |
| Figure S25 ..... | S-130 |
| Figure S26 ..... | S-131 |
| Figure S27 ..... | S-132 |
| Figure S28 ..... | S-133 |
| Figure S29 ..... | S-134 |
| Figure S30 ..... | S-135 |
| Figure S31 ..... | S-136 |

### List of Schemes

|                 |      |
|-----------------|------|
| Scheme S1 ..... | S-85 |
| Scheme S2 ..... | S-86 |
| Scheme S3 ..... | S-87 |
| Scheme S4 ..... | S-88 |
| Scheme S5 ..... | S-89 |

|                  |       |
|------------------|-------|
| Scheme S6 .....  | S-89  |
| Scheme S7 .....  | S-91  |
| Scheme S8 .....  | S-95  |
| Scheme S9 .....  | S-95  |
| Scheme S10 ..... | S-100 |
| Scheme S11 ..... | S-108 |
| Scheme S12 ..... | S-115 |
| Scheme S13 ..... | S-119 |
| Scheme S14 ..... | S-120 |
| Scheme S15 ..... | S-125 |
| Scheme S16 ..... | S-128 |

**List of Tables**

|                 |       |
|-----------------|-------|
| Table S1 .....  | S-63  |
| Table S2 .....  | S-64  |
| Table S3 .....  | S-74  |
| Table S4 .....  | S-76  |
| Table S5 .....  | S-77  |
| Table S6 .....  | S-91  |
| Table S7 .....  | S-91  |
| Table S8 .....  | S-91  |
| Table S9 .....  | S-92  |
| Table S10 ..... | S-92  |
| Table S11 ..... | S-93  |
| Table S12 ..... | S-94  |
| Table S13 ..... | S-101 |
| Table S14 ..... | S-103 |
| Table S15 ..... | S-105 |
| Table S16 ..... | S-108 |
| Table S17 ..... | S-111 |
| Table S18 ..... | S-113 |
| Table S19 ..... | S-116 |
| Table S20 ..... | S-120 |
| Table S21 ..... | S-125 |
| Table S22 ..... | S-128 |
| Table S23 ..... | S-131 |



## 1. Procedures, Materials and Instrumentation

### 1.1 General experimental procedures

Unless otherwise described, all reactions were performed in standard, oven- or flame-dried glassware equipped with PTFE-coated magnetic stir bars and fit with rubber septa under an inert atmosphere of nitrogen. Stainless steel syringes or cannulae were used to transfer air- and moisture-sensitive liquids. Reported concentrations refer to solution volumes at room temperature. Evaporation and concentration *in vacuo* were performed using house vacuum (~ 40 mm Hg). Column chromatography (using a Biotage® Isolera Four™) was performed using reusable cartridges filled with ZEOprep® 60 (40–63 micron) silica gel from American Scientific. Thin layer chromatography (TLC) using pre-coated glass plates covered with 0.20 mm silica gel with fluorescent indicator visualized upon UV irradiation ( $\lambda = 254$  nm) or anisaldehyde stain, was used for reaction monitoring and product detection.

### 1.2 Materials

Reagents were purchased in reagent grade from commercial suppliers and used without further purification, unless otherwise described. Anhydrous solvents (*tert*-butyl methyl ether, dichloromethane, *N,N*-dimethylformamide, ethyl ether, methanol, tetrahydrofuran, toluene) were prepared by passing the solvent through an activated alumina column.<sup>1</sup> Triethylamine, *N,N*-diisopropylethylamine, and pyridine were distilled from CaH<sub>2</sub> at atmospheric pressure.

Compounds **Schreiner's Thiourea**, **3a**, **3b**, **3c**, **3d**, **3h**, **3i**, **3l**, **3n**, **3j** and **S7** were commercially available.

Compounds **1**, *ent*-**1**,<sup>2</sup> **2a**,<sup>3</sup> **2b**,<sup>4</sup> **2c**,<sup>5</sup> **2d**, **2e**,<sup>6</sup> **2l**,<sup>6</sup> **3e**,<sup>7</sup> **3f**,<sup>8</sup> **3k**,<sup>9</sup> **3m**,<sup>10</sup> **4j**,<sup>11</sup> **4k**,<sup>12</sup> **4l**,<sup>13</sup> **4r**,<sup>14</sup> **S10**,<sup>15</sup> **S11**,<sup>16</sup> **S12a**,<sup>17</sup> and **S12c**,<sup>18</sup> have been reported previously.

### 1.3 Instrumentation

Proton nuclear magnetic resonance (<sup>1</sup>H NMR) spectra and proton-decoupled carbon nuclear magnetic resonance (<sup>13</sup>C NMR) spectra were recorded at 25 °C (unless stated otherwise) on Varian-Mercury-400 (400 MHz), Varian Unity/Inova 500 (500 MHz), or Varian Unity/Inova 600 (600 MHz) spectrometers at the Harvard University nuclear magnetic resonance facility. Chemical shifts for protons are reported in parts per million downfield from tetramethylsilane and are referenced to residual protium in the NMR solvent according to values reported in the literature.<sup>24</sup> Chemical shifts for carbon are reported in parts per million downfield from tetramethylsilane and are referenced to the carbon resonances of the solvent. The solvent peak was referenced to 7.26 ppm for <sup>1</sup>H and 77.16 ppm for <sup>13</sup>C for CDCl<sub>3</sub>. Data are represented as follows: chemical shift, integration, multiplicity (br = broad, s = singlet, d = doublet, t = triplet, q = quartet, qn = quintet, sp = septet, m = multiplet), coupling constants in Hertz (Hz).

Optical rotations were measured using a 1 mL cell with a 5 cm path length on a Jasco P-2000 digital polarimeter.

Infrared spectra were recorded using a Bruker Tensor 27 FT-IR spectrometer. Data are represented as follows: frequency of absorption (cm<sup>-1</sup>), intensity of absorption (s = strong, m = medium, w = weak, br = broad). In-situ IR kinetic experiments were carried out using a Mettler Toledo ReactIR™ iC 10 ATR FTIR spectrometer and a 9 mm AgX probe with a SiComp (silicon-based) window.

Low-resolution mass spectrometry was measured using an Agilent 6120 Quadrupole LC/MS, samples were injected in 0.1% formic acid in methanol and bypassed the LC column en route to the MS detector. High-resolution mass spectrometry was measured using a Bruker micrOTOF-QII™ ESI-Qq-TOF mass spectrometer calibrated using an aqueous sodium formate solution (prepared via adding 1 mL of 1 M aq. NaOH in 100 mL of 1% aq. formic acid). Additional high-resolution mass spectrometry was measured at the Small Molecule Mass Spectrometry Facility at Harvard University within the Faculty of Arts and Sciences using an Agilent 6220 Electrospray Time-of-Flight LC/MS.

Chiral stationary phase high performance liquid chromatography (HPLC) analysis was performed using an Agilent 1200 quaternary HPLC system with a commercially available AD-H chiral column.

X-ray crystallographic data was collected at the Harvard X-ray Laboratory. The structural refinement details for the X-ray crystallographic data are described in the individual CIFs. X-ray crystallographic data for catalyst **1** and galactosyl phosphate (**2a**) have been deposited at the Cambridge Crystallographic Data Centre (CCDC), 12 Union Road, Cambridge CB21EZ, UK; fax: (+44)122-333-6033. These data can be obtained free of charge via the Internet at [www.ccdc.cam.ac.uk/data\\_request/cif](http://www.ccdc.cam.ac.uk/data_request/cif) using the CCDC numbers given above.

#### 1.4 Software

All curve fitting presented in this paper was carried out using MatLab.<sup>19</sup> NMR spectra were processed with iNMR.<sup>20</sup> X-ray crystallographic and computed structures were rendered with CYLview<sup>21</sup> and MacPyMOL.<sup>22</sup>

#### 1.5 Abbreviations

aq = aqueous, atm = atmosphere, 9-BBN = 9-borabicyclo[3.3.1]nonane, Boc = *tert*-butyl carbamate, CSP = chiral stationary phase, DFB = 1,2 difluorobenzene, DIPEA = diisopropylethylamine, DMAP = 4-dimethylaminopyridine, DMPU = 1,3-dimethyl-3,4,5,6-tetrahydro-2(1*H*)-pyrimidinone, EDC•HCl = 1-3(dimethylamino)propyl-3-ethyl-carbodiimide hydrochloride, ee = enantiomeric excess, ESI = electrospray ionization, HBTU = *O*-benzotriazol-1-yl-*N,N,N',N'*-tetramethyluronium hexafluorophosphate, HPLC = high performance liquid chromatography, HR = high-resolution, LC = liquid chromatography, LDA = lithium diisopropylamide, LR = low-resolution, MS = mass spectrometry, NA = not applicable, ND = not determined, NOESY = nuclear Overhauser effect spectroscopy, PTFE = polytetrafluoroethylene, rt = room temperature, TBME = *tert*-butyl methyl ether, TCDI = 1,1'-thiocarbonyldiimidazole, Tf = trifluoromethanesulfonate, TFA = trifluoroacetic acid, THF = tetrahydrofuran, TMAC = tetramethylammonium chloride, TLC = thin-layer chromatography, TOF = time-of-flight, v/v = volume/volume, w/v = weight/volume, XRD = X-ray diffraction.

## 2. Synthetic Procedures and Characterization Data

### 2.1 General Procedure for Glycosylation Reactions

To a flame-dry 5 mL round bottom flask with a stir bar was charged 0.250 mmol **donor**, 250 mg flame-dry 4 Å molecular sieves, 0.0125 mmol **catalyst**, and 0.500 mmol **acceptor**. 2.50 mL diisopropyl ether was added to the reaction mixture open to air and the flask was closed with a plastic cap and parafilm was used to seal the cap tightly. The mixture was then heated with efficient stirring at 40 °C in an oil bath for 19 hours over which time the mixture thickened. After 19 hours, the mixture is cooled to room temperature and 100 µL aliquot is diluted with diethyl ether and filtered to remove the molecular sieves. This solution is concentrated and <sup>1</sup>H NMR analysis on the crude mixture is used to determine the anomeric selectivity. The mixture was then chromatographed directly with 50 g SiO<sub>2</sub> using an ether/hexanes gradient on a Biotage MPLC.

*Note: Donor is added as a solution in diisopropyl ether when stated. Phosphate donors have been found to be stable and remain pure for >6 months as solutions in ethereal solvents.*

## 2.2 Synthetic Procedures and Characterization Data for Previously Unreported Compounds

### Preparation of 4a

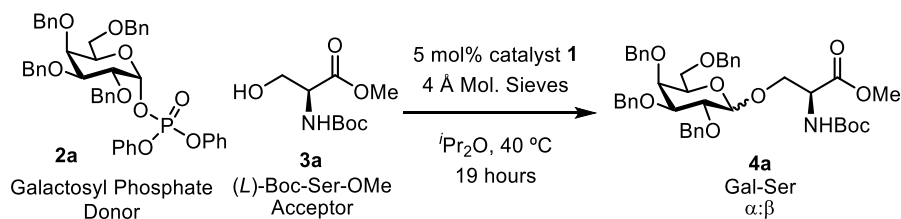

To a flame-dry 5 mL round bottom flask with a stir bar was charged 193 mg (0.250 mmol) galactosyl phosphate donor (**2a**), 250 mg flame-dry 4 Å molecular sieves, 14 mg (0.0125 mmol) catalyst **1**, and 110 mg (0.500 mmol) *L*-Boc-Ser-OMe (**3a**). 2.50 mL diisopropyl ether was added to the reaction mixture open to air and the flask was closed with a plastic cap and parafilm was used to seal the cap tightly. The mixture was then heated with efficient stirring at 40 °C in an oil bath for 19 hours over which time the mixture thickened. After 19 hours, the mixture is cooled to room temperature and 100  $\mu\text{L}$  aliquot is diluted with diethyl ether and filtered to remove the molecular sieves. This solution is concentrated and  $^1\text{H}$  NMR analysis on the crude mixture is used to determine the anomeric selectivity (97:3  $\beta:\alpha$ ). The mixture was then chromatographed directly with 50 g  $\text{SiO}_2$  using an ether/hexanes gradient on a Biotage MPLC to yield the product (**4a**) in quantitative yield (180 mg pure- $\beta$  and 11 mg as an  $\alpha:\beta$  mixture).

$^1\text{H-NMR}$  (600 MHz;  $\text{CDCl}_3$ ):  $\delta$  7.41-7.26 (m, 20H), 5.48 (d,  $J = 8.2$  Hz, 1H), 4.93 (d,  $J = 11.6$  Hz, 1H), 4.85 (d,  $J = 10.8$  Hz, 1H), 4.72 (m, 3H), 4.61 (d,  $J = 11.6$  Hz, 1H), 4.46-4.40 (m, 3H), 4.32 (d,  $J = 7.8$  Hz, 1H), 4.30 (dd,  $J = 10.6, 2.8$  Hz, 1H), 3.89 (s, 1H), 3.80-3.76 (m, 2H), 3.72 (s, 3H), 3.57 (m, 2H), 3.52-3.50 (m, 2H), 1.42 (s, 9H).

$^{13}\text{C-NMR}$  (126 MHz,  $\text{CDCl}_3$ ):  $\delta$  170.79, 155.57, 138.56, 138.50, 138.40, 137.90, 128.50, 128.44, 128.41, 128.38, 128.33, 128.28, 127.93, 127.88, 127.68, 127.59, 104.53, 82.19, 79.93, 79.11, 77.41, 77.16, 76.90, 75.39, 74.69, 73.60, 73.45, 73.04, 70.14, 68.62, 54.13, 52.56, 28.38.

**HRMS-ESI (m/z)**: calculated for  $\text{C}_{43}\text{H}_{51}\text{NO}_{10}$   $[\text{M}+\text{H}]^+$ : 742.3586, found: 742.3572 .

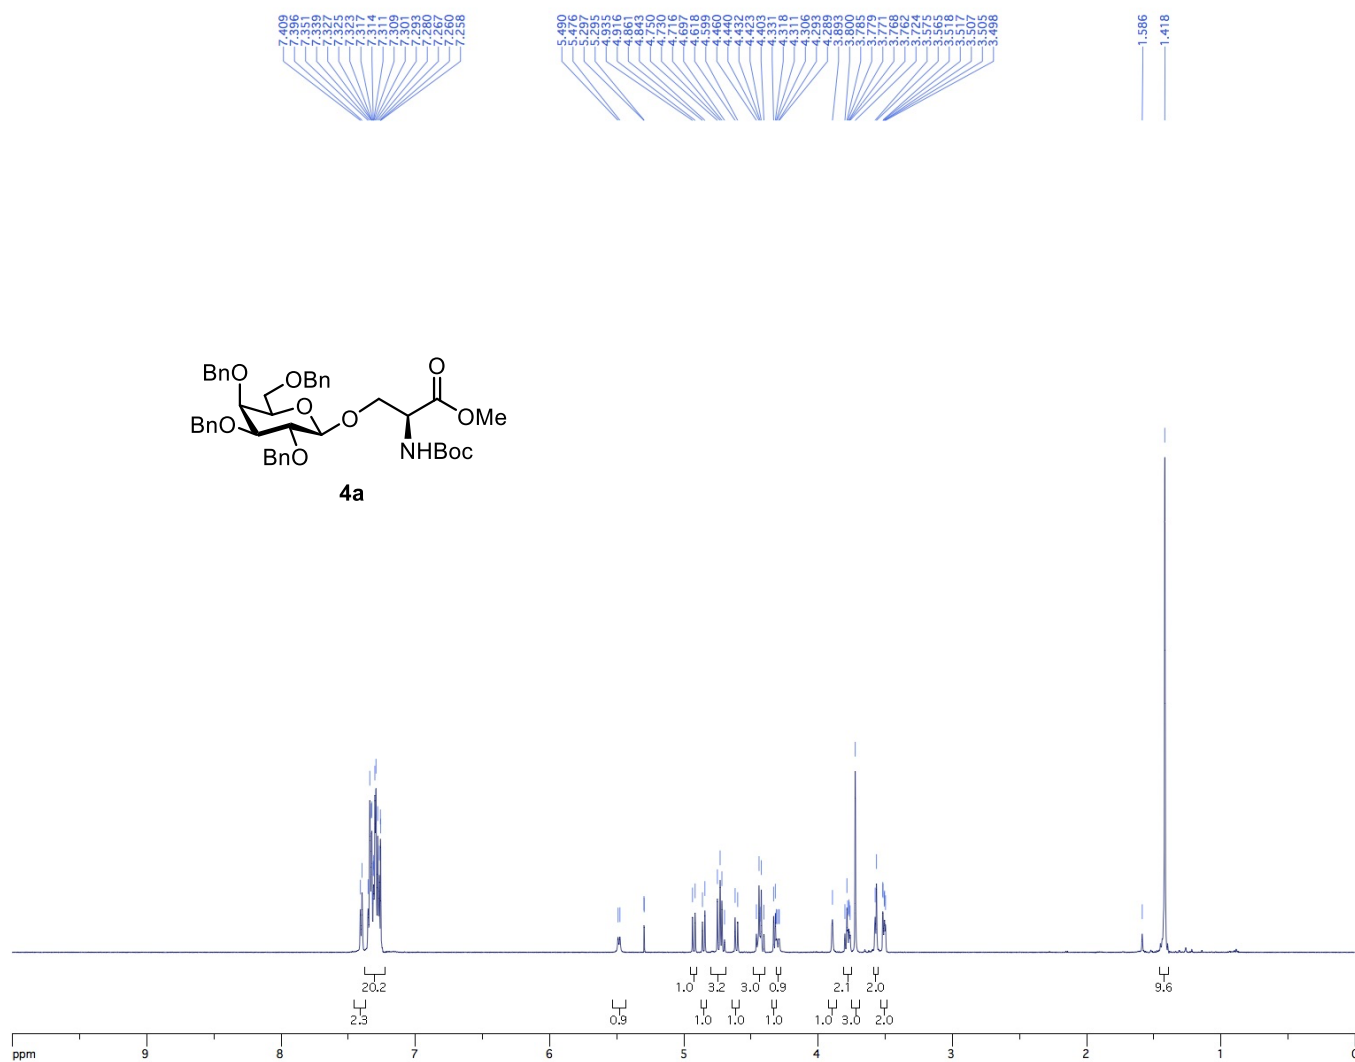

<sup>1</sup>H NMR (600 MHz) spectrum of **4a** in CDCl<sub>3</sub>.

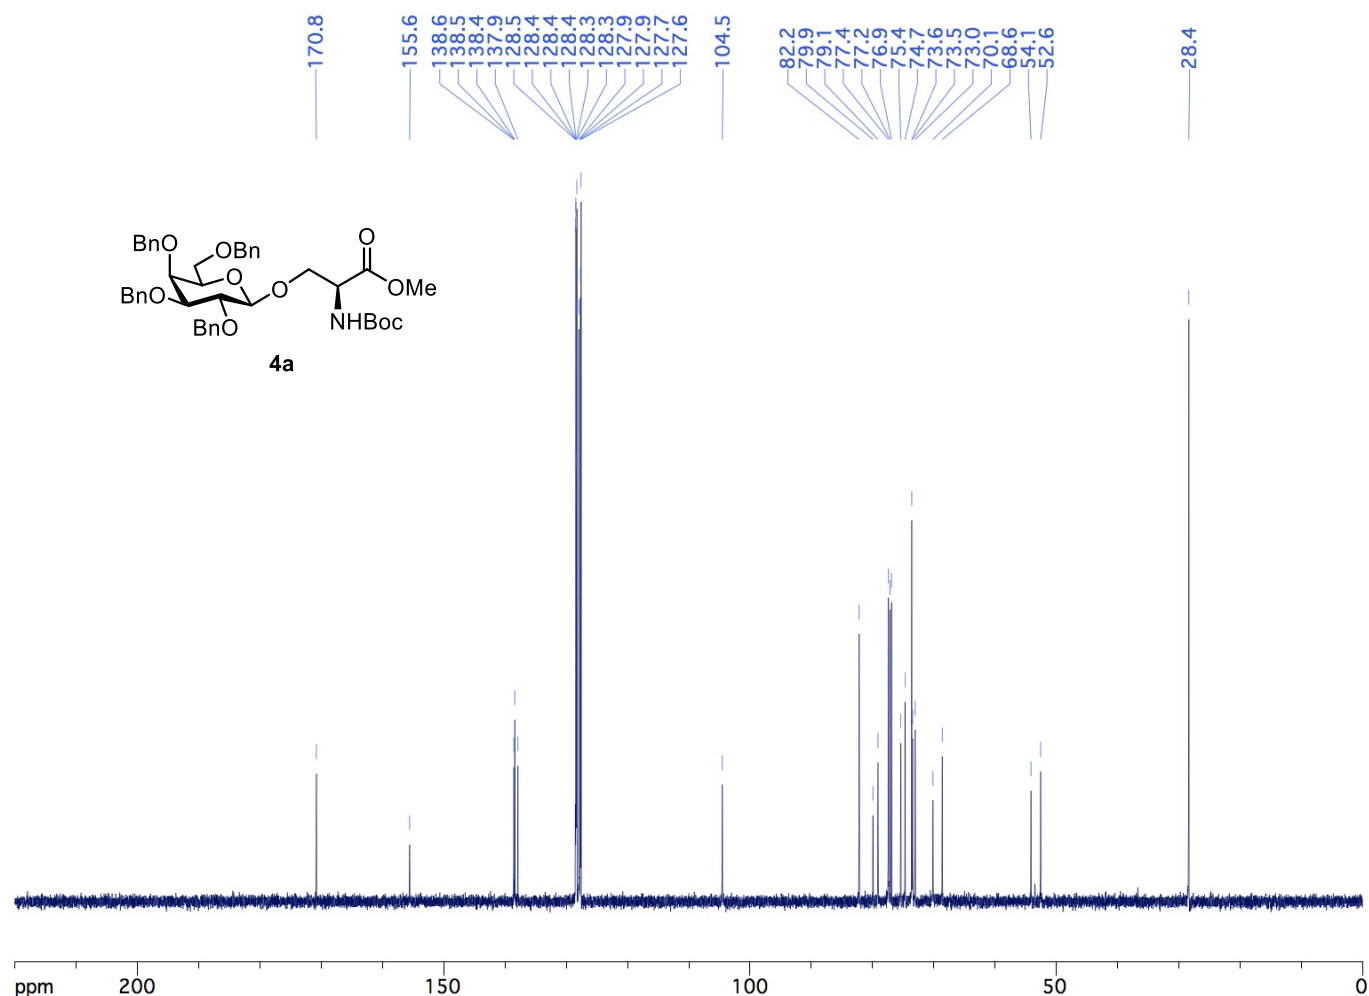

$^{13}\text{C}$  NMR (126 MHz) spectrum of **4a** in  $\text{CDCl}_3$ .

### Preparation of **4b**

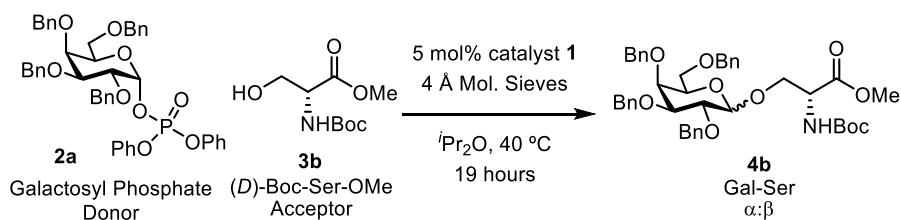

To a flame-dry 5 mL round bottom flask with a stir bar was charged 193 mg (0.250 mmol) galactosyl phosphate donor (**2a**), 250 mg flame-dry 4 Å molecular sieves, 14 mg (0.0125 mmol) catalyst **1**, and 110 mg (0.50 mmol)  $D$ -Boc-Ser-OMe (**3b**). 2.5 mL diisopropyl ether was added to the reaction mixture open to air and the flask was closed with a plastic cap and parafilm was used to seal the cap tightly. The mixture was then heated with efficient stirring at 40 °C in an oil bath for 19 hours over which time the mixture thickened. After 19 hours, the mixture is cooled to room temperature and 100  $\mu\text{L}$  aliquot is diluted with diethyl ether and filtered to remove the molecular sieves. This solution is concentrated and  $^1\text{H}$  NMR analysis on the crude mixture is used to determine the anomeric selectivity (96:4  $\beta:\alpha$ ). The mixture was then chromatographed directly with 50 g  $\text{SiO}_2$  using an ether/hexanes gradient on a Biotage MPLC to yield the product (**4b**) in 91% yield (169 mg, 0.228 mmol) as a mixture of anomers (163 mg pure  $\beta$ - and 6 mg purified  $\alpha$ -product).

**<sup>1</sup>H-NMR** (500 MHz, CDCl<sub>3</sub>): δ 7.35-7.25 (m, *J* = 7.5 Hz, 20H), 5.60 (d, *J* = 8.9 Hz, 1H), 4.91 (d, *J* = 11.6 Hz, 1H), 4.78-4.60 (m, *J* = 12.7 Hz, 5H), 4.46-4.38 (m, 3H), 4.30 (d, *J* = 7.6 Hz, 1H), 4.08-4.03 (m, 2H), 3.87 (s, 1H), 3.78-3.75 (t, *J* = 9.6 Hz, 1H), 3.60-3.45 (m, 7H), 1.44 (s, 9H).

**<sup>13</sup>C-NMR** (126 MHz, CDCl<sub>3</sub>): δ 171.03, 155.61, 138.58, 138.47, 138.39, 137.85, 128.48, 128.41, 128.29, 128.11, 127.91, 127.87, 127.72, 127.65, 127.58, 104.19, 82.10, 79.89, 79.00, 77.41, 77.15, 76.90, 75.02, 74.66, 73.65, 73.60, 73.37, 73.14, 70.38, 68.67, 53.85, 52.46, 28.40.

**HRMS-ESI (m/z):** calculated for C<sub>43</sub>H<sub>51</sub>NO<sub>10</sub> [M+H]<sup>+</sup>: 742.3586, found: 742.3579 .

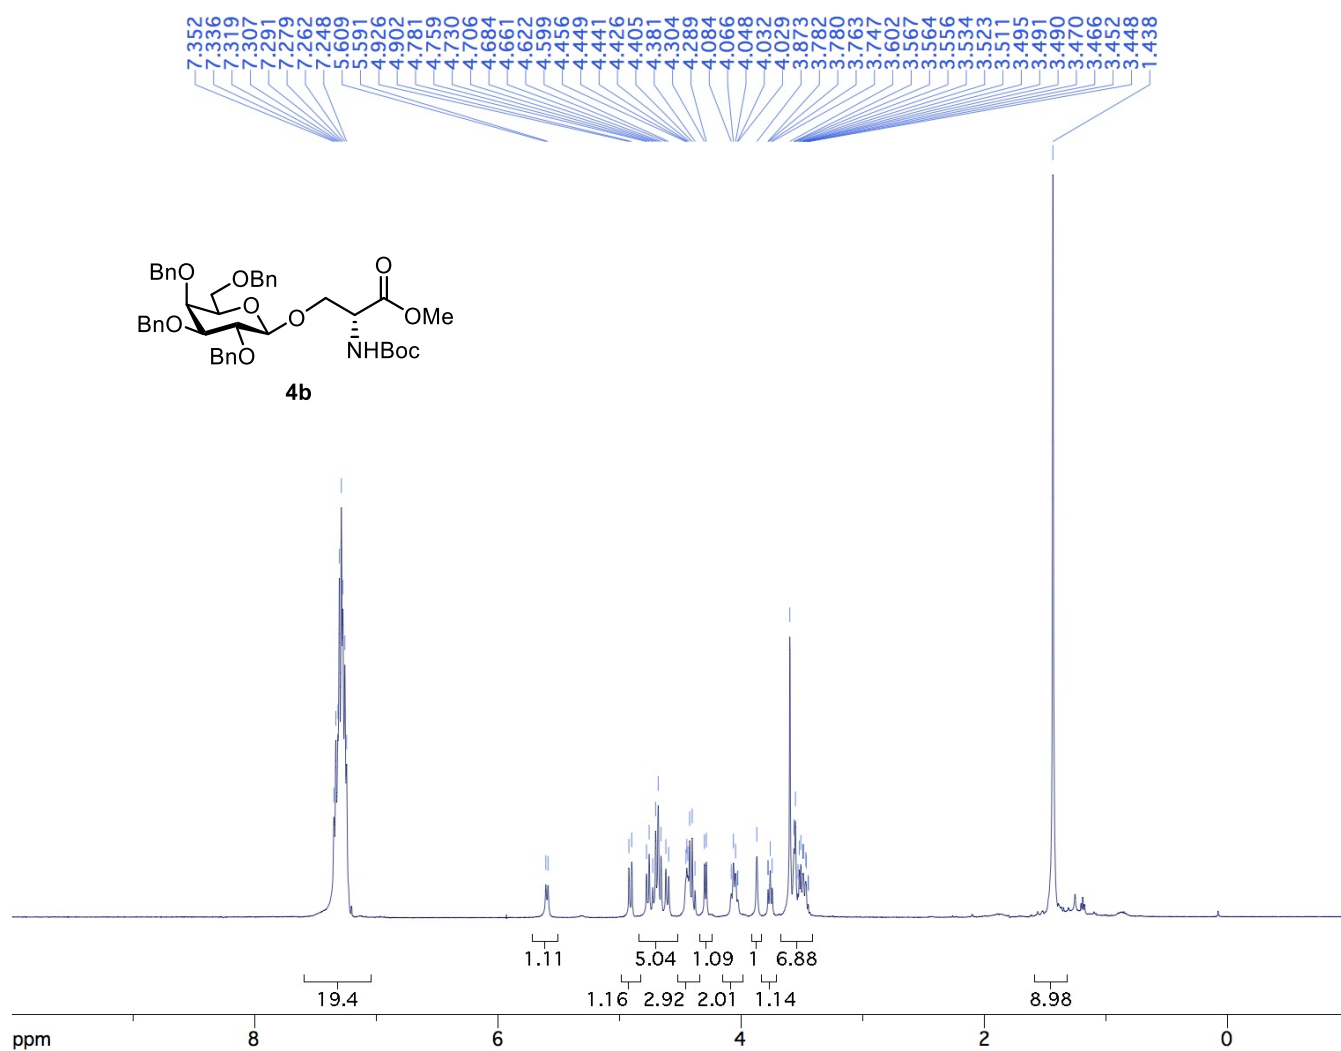

<sup>1</sup>H NMR (500 MHz) spectrum of **4b** in CDCl<sub>3</sub>.

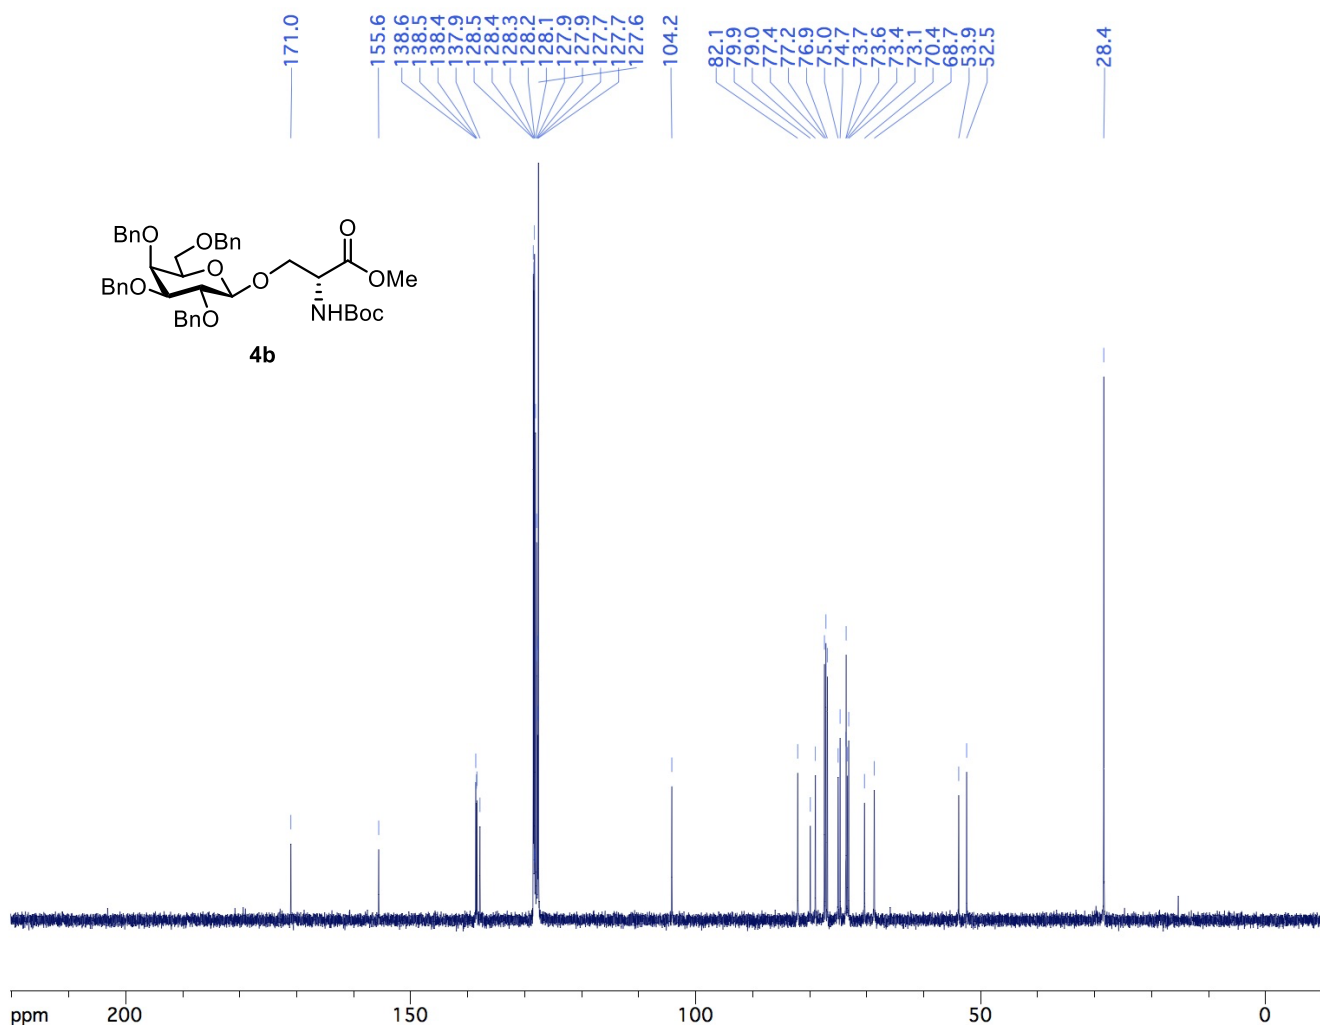

$^{13}\text{C}$  NMR (126 MHz) spectrum of **4b** in  $\text{CDCl}_3$ .

### Preparation of **4c**

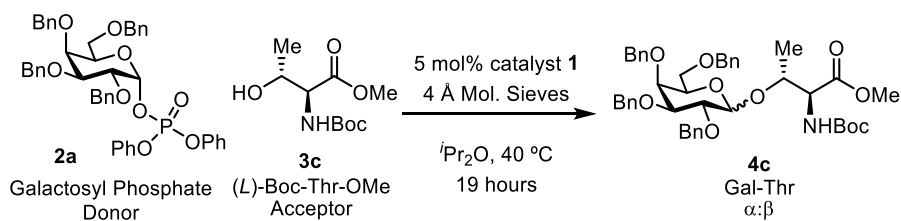

To a flame-dry 5 mL round bottom flask with a stir bar was charged 193 mg (2.50 mmol) galactosyl phosphate donor (**2a**), 250 mg flame-dry 4 Å molecular sieves, 14 mg (0.0125 mmol) catalyst **1**, and 110 mg (0.50 mmol) *L*-Boc-Thr-OMe (**3c**). 2.5 mL diisopropyl ether was added to the reaction mixture open to air and the flask was closed with a plastic cap and parafilm was used to seal the cap tightly. The mixture was then heated with efficient stirring at 40 °C in an oil bath for 19 hours over which time the mixture thickened. After 19 hours, the mixture is cooled to room temperature and 100  $\mu\text{L}$  aliquot is diluted with diethyl ether and filtered to remove the molecular sieves. This solution is concentrated and  $^1\text{H}$  NMR analysis on the crude mixture is used to



determine the anomeric selectivity (96:4  $\beta$ : $\alpha$ ). The mixture was then chromatographed directly with 50 g SiO<sub>2</sub> using an ether/hexanes gradient on a Biotage MPLC to yield the product (**4c**) in 92% yield (173 mg, 0.229 mmol) as a mixture of anomers.

<sup>1</sup>H-NMR (600 MHz, CDCl<sub>3</sub>):  $\delta$  7.36-7.26 (m, 20H), 5.55 (d,  $J$  = 8.2 Hz, 1H), 5.29 (d,  $J$  = 1.1 Hz, 1H), 4.95 (d,  $J$  = 11.6 Hz, 1H), 4.84 (d,  $J$  = 10.8 Hz, 1H), 4.76-4.69 (m, 3H), 4.60 (d,  $J$  = 11.6 Hz, 1H), 4.42 (q,  $J$  = 9.8 Hz, 2H), 4.35-4.32 (m, 2H), 4.22 (dd,  $J$  = 8.2, 3.4 Hz, 1H), 3.90 (d,  $J$  = 2.2 Hz, 1H), 3.74 (dd,  $J$  = 9.7, 7.8 Hz, 1H), 3.65 (s, 3H), 3.61 (t,  $J$  = 8.4 Hz, 1H), 3.54 (dd,  $J$  = 8.9, 5.2 Hz, 1H), 3.50-3.46 (m, 2H), 1.45 (s, 9H), 1.26 (d,  $J$  = 6.4 Hz, 3H).

<sup>13</sup>C-NMR (126 MHz, CDCl<sub>3</sub>):  $\delta$  171.24, 156.21, 138.74, 138.57, 138.46, 137.86, 128.47, 128.39, 128.35, 128.23, 128.15, 128.09, 127.88, 127.61, 127.53, 102.23, 82.20, 79.72, 79.15, 77.35, 77.10, 76.84, 75.35, 75.27, 74.70, 73.66, 73.56, 73.25, 73.03, 68.35, 58.52, 28.37, 17.74.

HRMS-ESI ( $m/z$ ): calculated for C<sub>44</sub>H<sub>53</sub>NO<sub>10</sub> [M+H]<sup>+</sup>: 756.3742, found: 742.3741

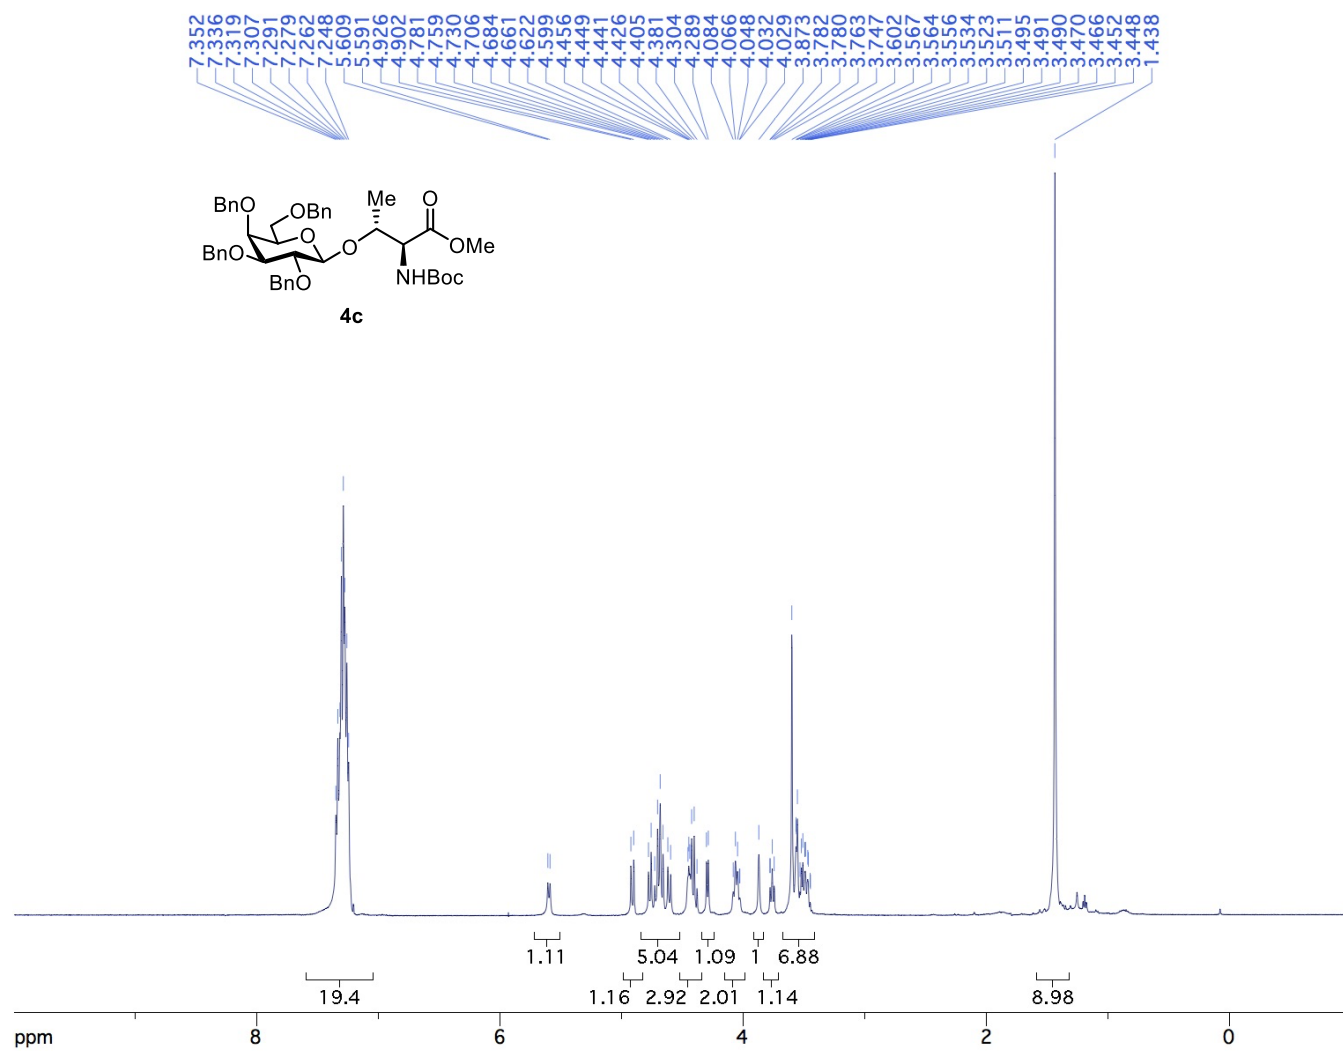

<sup>1</sup>H NMR (600 MHz) spectrum of **4c** in CDCl<sub>3</sub>

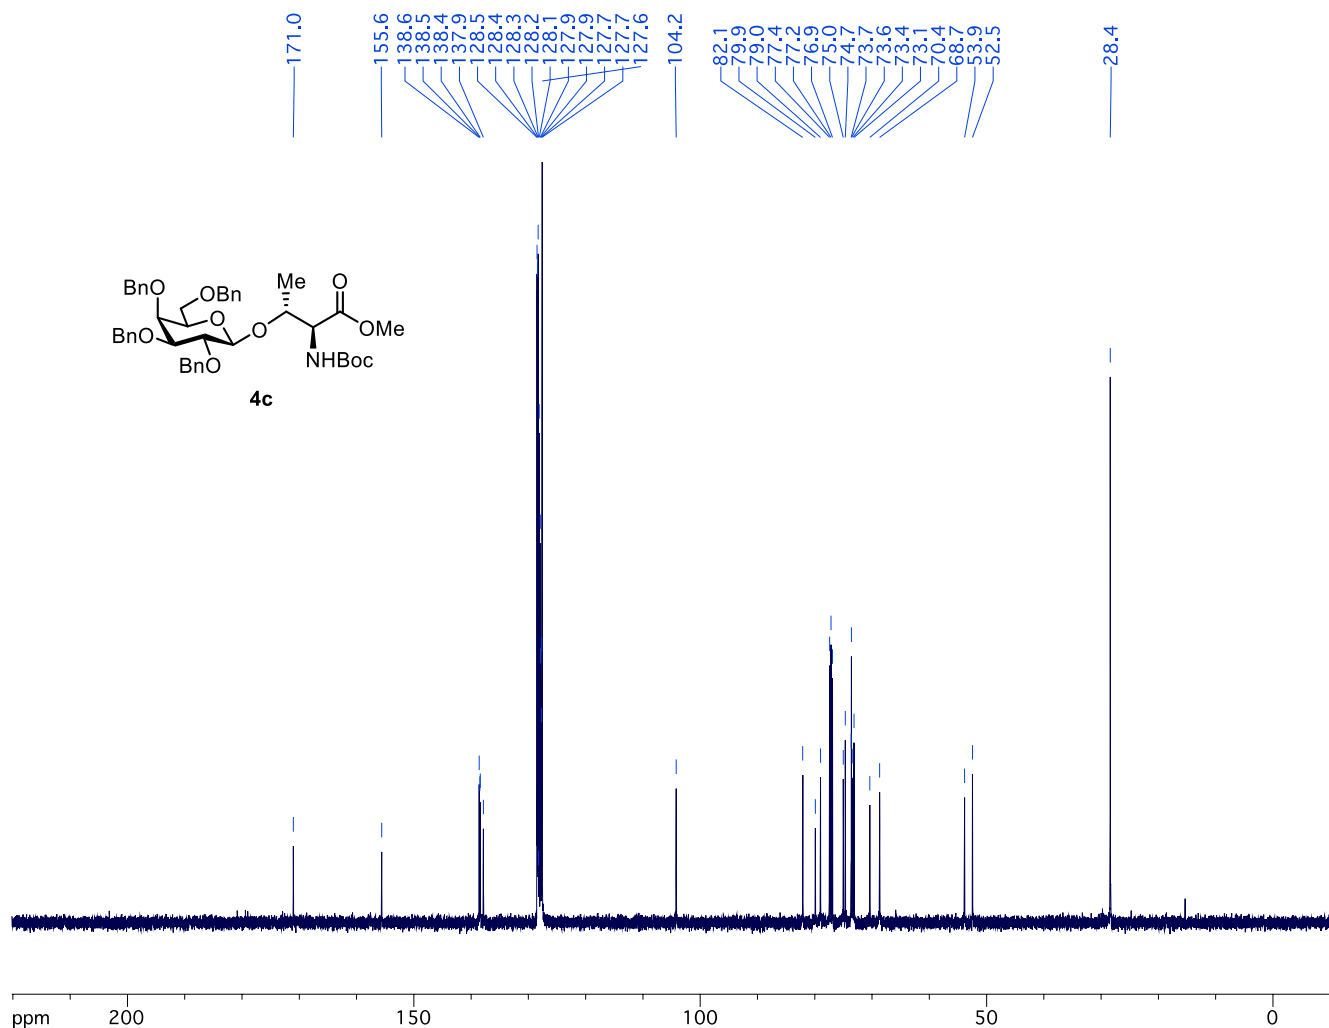

$^{13}\text{C}$  NMR (126 MHz) spectrum of **4c** in  $\text{CDCl}_3$ .

### Preparation of **4f**

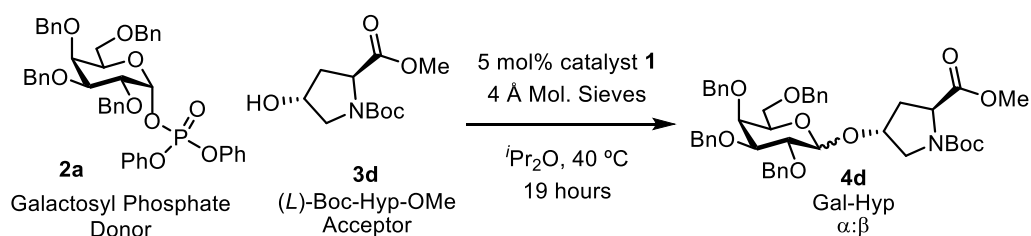

To a flame-dry 5 mL round bottom flask with a stir bar was charged 250 mg flame-dry 4 Å molecular sieves, 14 mg (0.125 mmol) catalyst **1**, and 112 mg (0.500 mmol) (*L*)-Boc-Hyp-OME (**3d**). 2.5 mL of a 0.1 M solution of galactosyl phosphate donor (**2a**) in diisopropyl ether was added to the reaction mixture open to air and the flask was closed with a plastic cap and parafilm was used to seal the cap tightly. The mixture was then heated with efficient stirring at 40 °C in an oil bath for 19 hours over which time the mixture thickened. After 19 hours, the mixture is cooled to room temperature and 100  $\mu\text{L}$  aliquot is diluted with diethyl ether and filtered to remove the molecular sieves. This solution is concentrated and  $^1\text{H}$  NMR analysis on the crude mixture is used to determine the anomeric selectivity (95:5  $\beta:\alpha$ ). The mixture was then chromatographed directly with 50 g  $\text{SiO}_2$  using

an ether/hexanes gradient on a Biotage MPLC to yield the product (**4d**) in 80% yield (154 mg, 0.218 mmol) as a mixture of anomers.

$^1\text{H-NMR}$  (500 MHz,  $\text{CDCl}_3$ ):  $\delta$  7.38-7.27 (m, 20H), 4.98-4.95 (m, 1H), 4.87-4.84 (m, 1H), 4.82-4.73 (m, 3H), 4.66 (d,  $J = 11.7$  Hz, 1H), 4.48-4.34 (m, 5H), 3.93 (s, 1H), 3.86-3.82 (m, 1H), 3.78-3.70 (m, 5H), 3.62-3.53 (m, 4H), 2.44-2.36 (m, 1H), 2.08-2.04 (m, 1H), 1.48-1.43 (m, 9H).

$^{13}\text{C-NMR}$  (126 MHz,  $\text{CDCl}_3$ ):  $\delta$  173.51, 173.29, 154.47, 153.54, 138.52, 138.49, 138.40, 138.38, 137.83, 128.57, 128.47, 128.40, 128.35, 128.31, 128.26, 128.23, 128.12, 128.07, 128.06, 127.98, 127.91, 127.84, 127.79, 127.70, 127.66, 127.63, 127.56, 127.49, 127.47, 102.51, 102.36, 82.29, 82.24, 80.13, 79.16, 77.37, 77.32, 77.12, 76.86, 76.62, 75.85, 75.47, 75.37, 74.57, 73.69, 73.61, 73.31, 73.26, 73.12, 72.99, 68.83, 68.69, 57.81, 57.38, 53.07, 52.75, 52.24, 52.02, 36.00, 35.31, 28.40, 28.28.

**HRMS-ESI (m/z)**: calculated for  $\text{C}_{45}\text{H}_{53}\text{NO}_{10}$   $[\text{M}+\text{H}]^+$ : 768.3742, found: 742.3740.

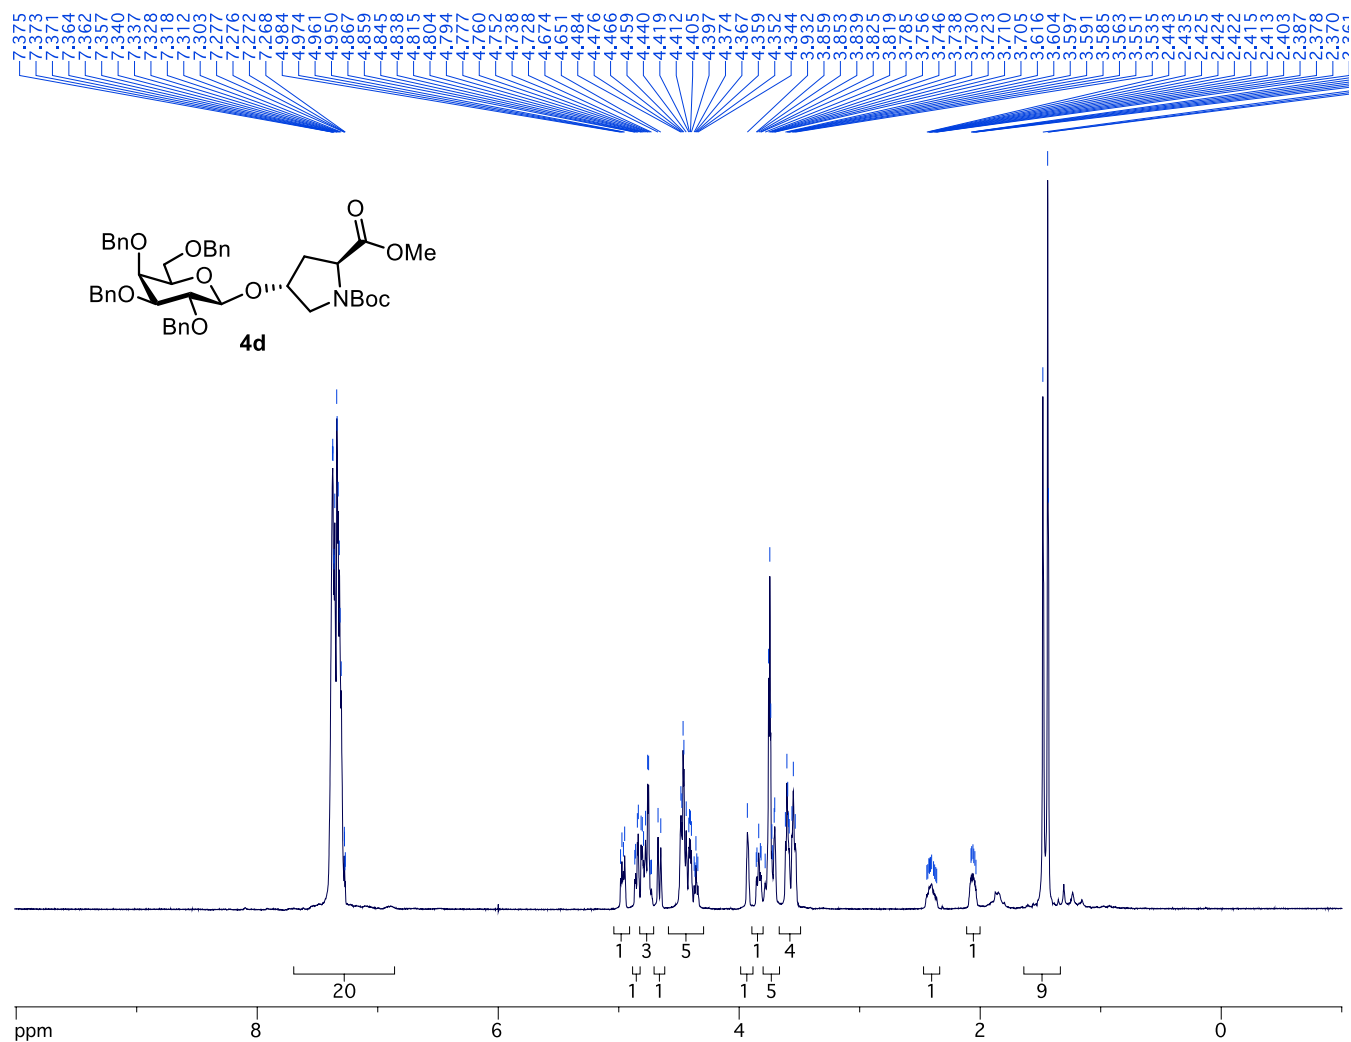

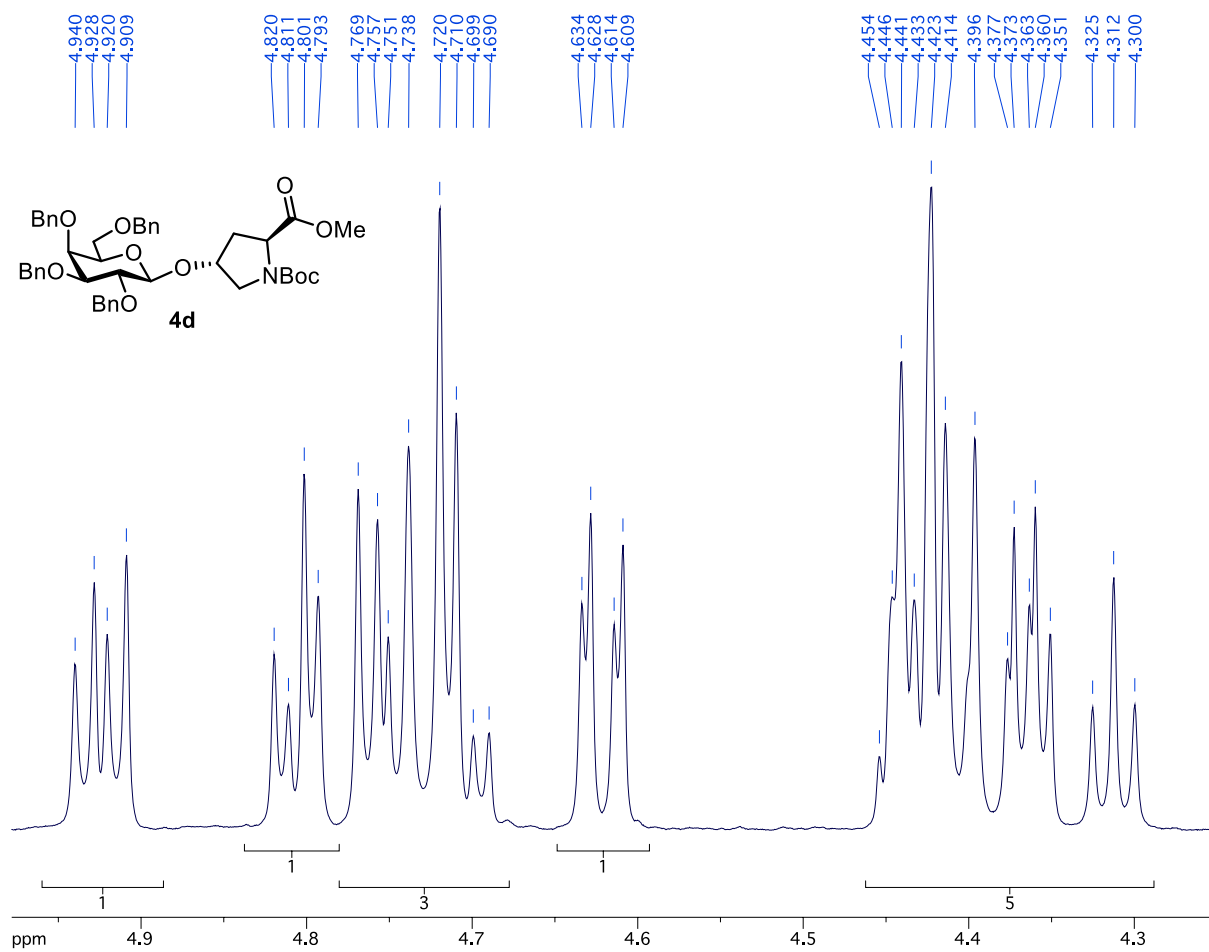

$^1\text{H}$  NMR (500 MHz) spectrum of **4d** in  $\text{CDCl}_3$  (4.2-5.1 ppm)

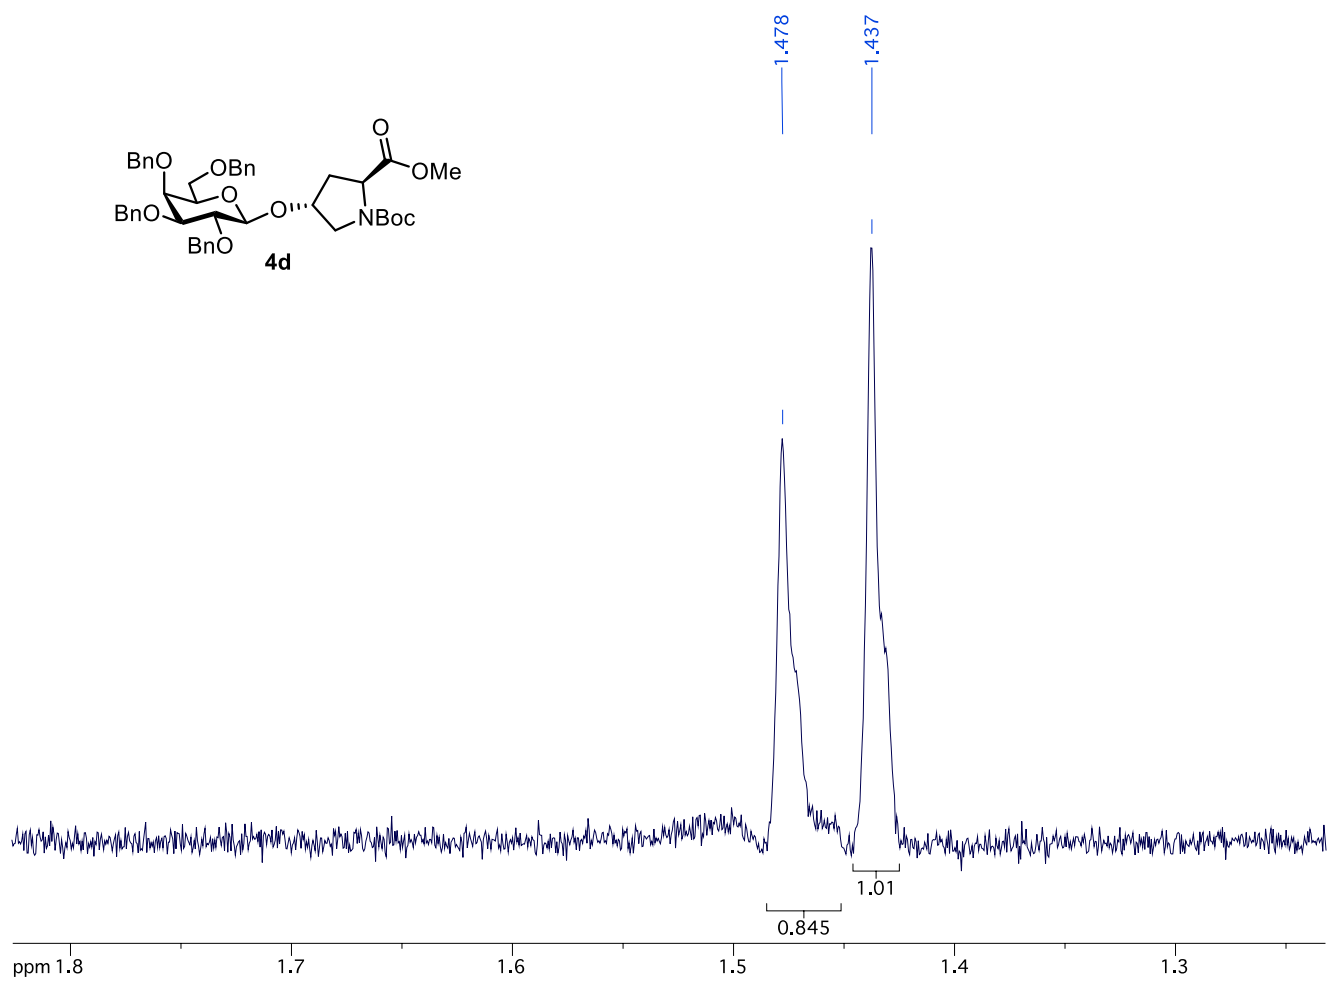

$^1\text{H}$  1D NOE NMR (500 MHz) spectrum of **4d** in  $\text{CDCl}_3$  irradiated at 1.437 ppm



selectivity (96:4  $\beta$ : $\alpha$ ). The mixture was then chromatographed directly with 50 g SiO<sub>2</sub> using an ether/hexanes gradient on a Biotage MPLC to yield the product (**4e**) in 84% yield (180 mg, 0.210 mmol) as a mixture of anomers.

<sup>1</sup>H-NMR (600 MHz, CDCl<sub>3</sub>):  $\delta$  7.36-7.25 (m, 20H), 7.01 (s, 1H), 5.52 (s, 1H), 4.95 (d,  $J$  = 11.4 Hz, 1H), 4.84 (d,  $J$  = 11.0 Hz, 1H), 4.77 (d,  $J$  = 11.0 Hz, 1H), 4.76-4.71 (m, 2H), 4.58 (d,  $J$  = 11.4 Hz, 1H), 4.54-4.40 (m, 5H), 4.02 (s, 1H), 3.91 (d,  $J$  = 2.6 Hz, 1H), 3.85 (dd,  $J$  = 9.7, 7.7 Hz, 1H), 3.80 (dd,  $J$  = 11.0, 7.9 Hz, 1H), 3.64-3.58 (m, 6H), 3.54 (dd,  $J$  = 9.8, 2.9 Hz, 1H), 1.56-1.37 (m, 2H), 1.43-1.37 (m, 10H), 0.83 (dd,  $J$  = 15.8, 6.3 Hz, 6H).

<sup>13</sup>C-NMR (126 MHz, CDCl<sub>3</sub>):  $\delta$  172.65, 169.77, 155.47, 138.64, 138.59, 138.38, 137.79, 128.49, 128.42, 128.37, 128.22, 128.16, 128.15, 127.87, 127.67, 127.60, 127.57, 104.85, 82.10, 79.97, 79.29, 75.32, 74.74, 73.61, 73.53, 73.46, 73.02, 70.42, 68.52, 53.84, 52.10, 50.96, 41.23, 28.34, 24.68, 22.82, 21.88.

HRMS-ESI ( $m/z$ ): calculated for C<sub>49</sub>H<sub>62</sub>N<sub>2</sub>O<sub>11</sub> [M+H]<sup>+</sup>: 855.4426, found: 855.4426.

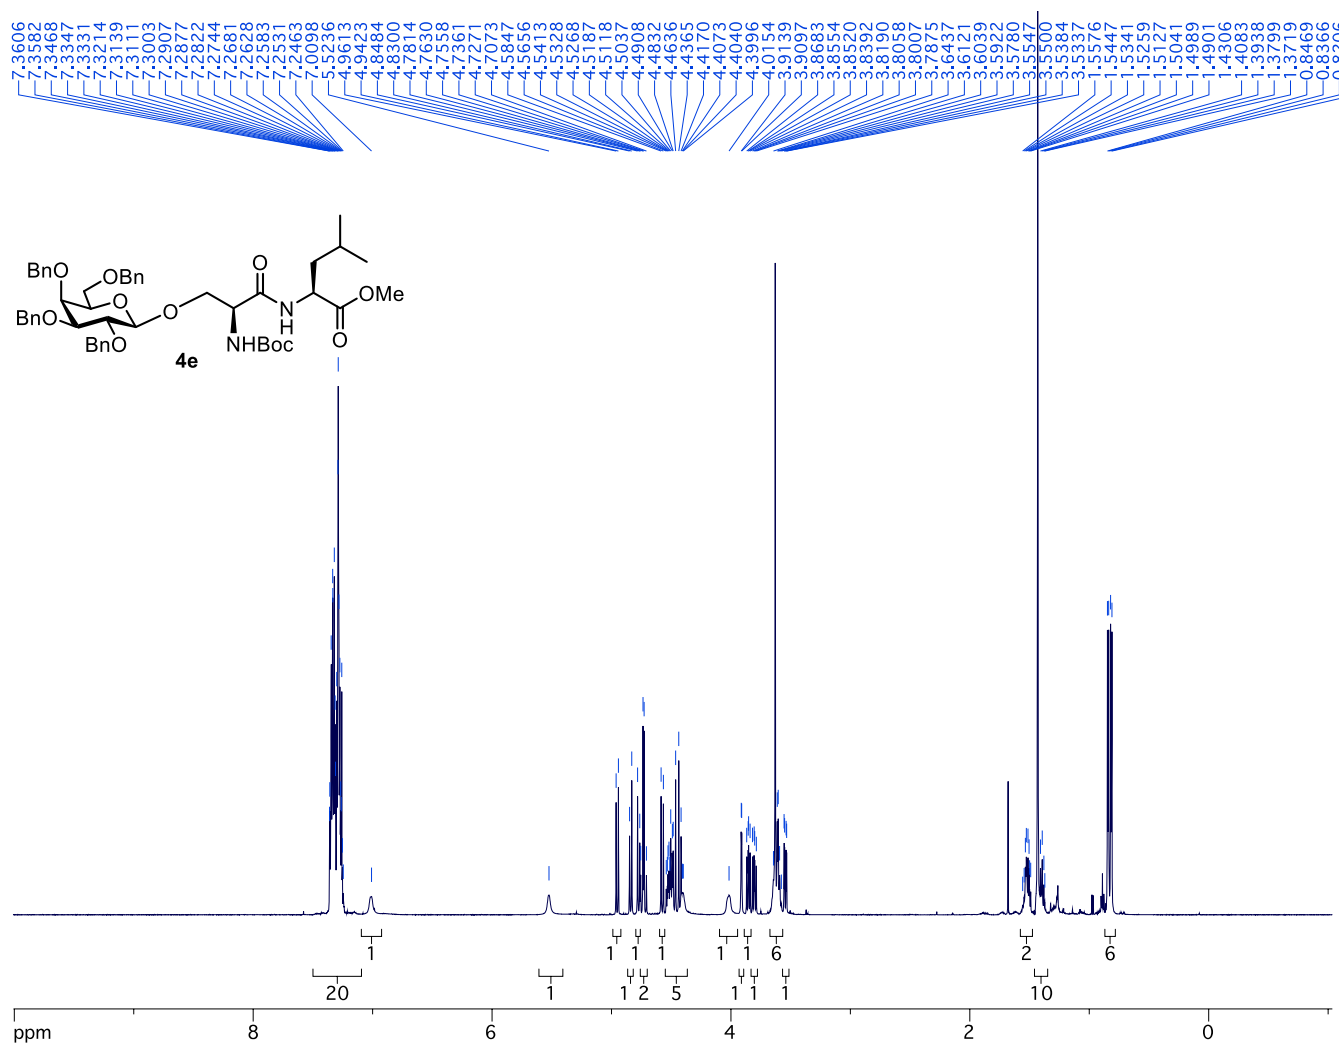

<sup>1</sup>H NMR (600 MHz) spectrum of **4e** in CDCl<sub>3</sub>

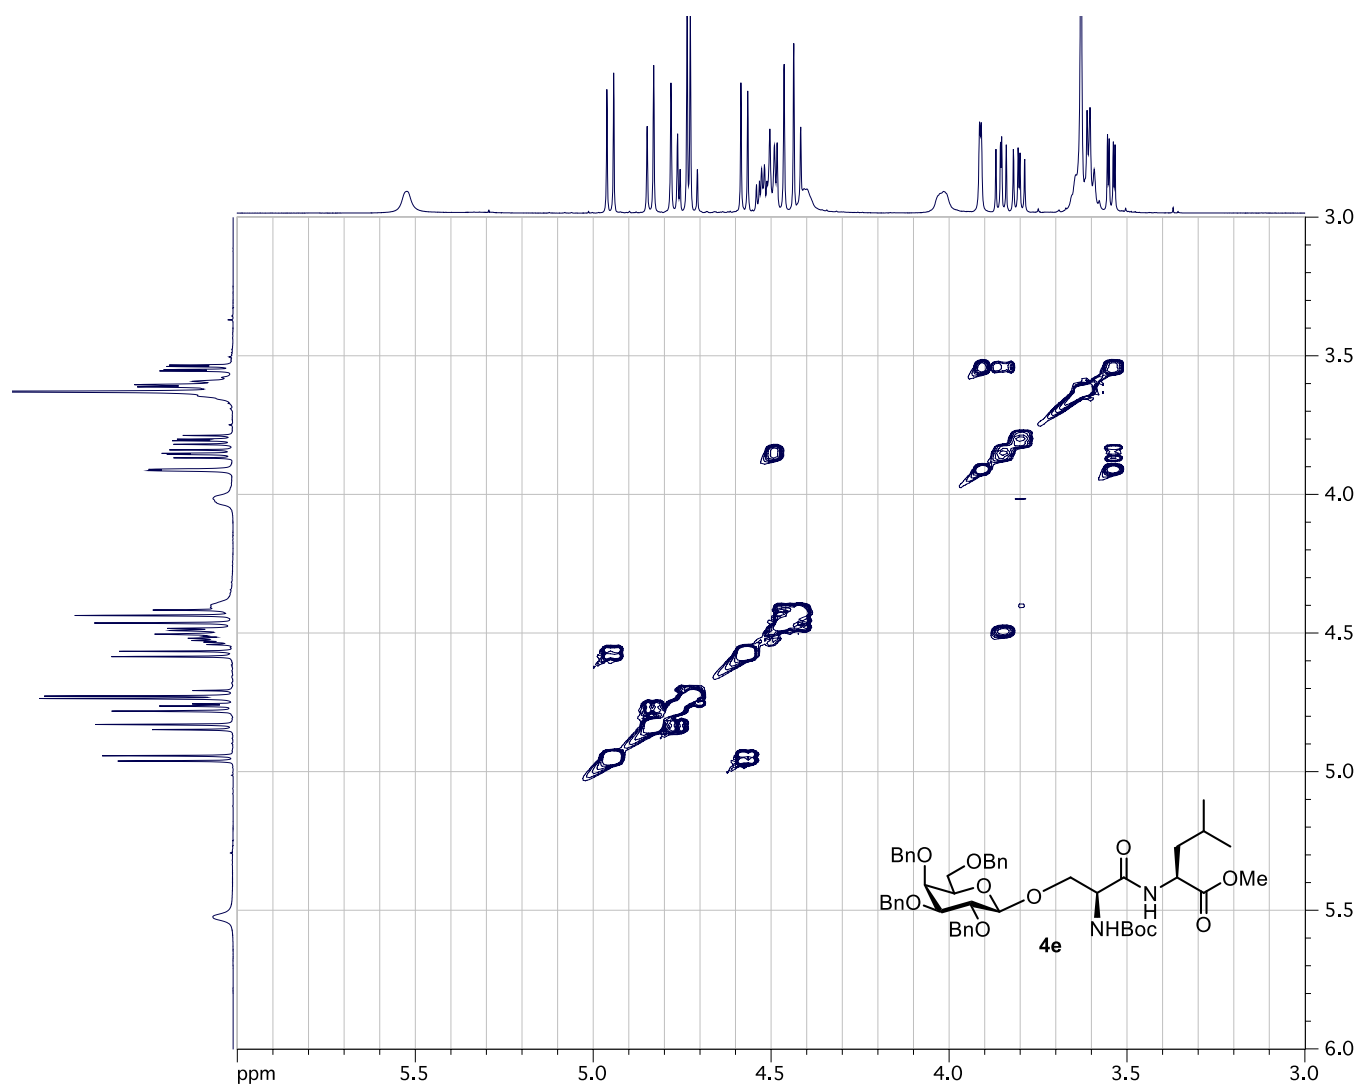

$^1\text{H}$ - $^1\text{H}$  COSY NMR (600 MHz) spectrum of **4e** in  $\text{CDCl}_3$



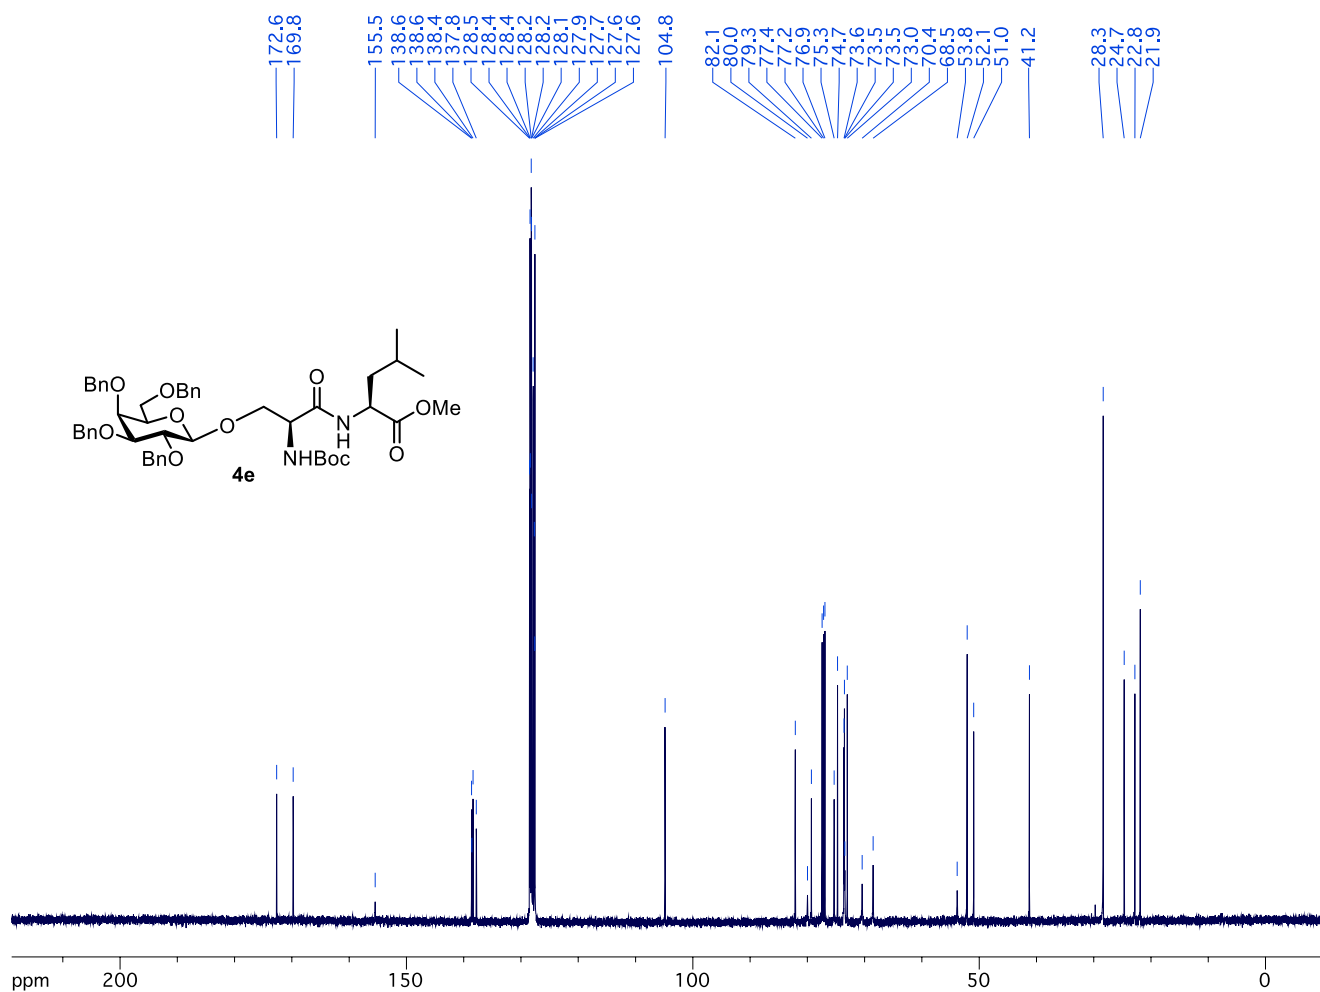

$^{13}\text{C}$  NMR (126 MHz) spectrum of **4e** in  $\text{CDCl}_3$ .

### Preparation of **4f**

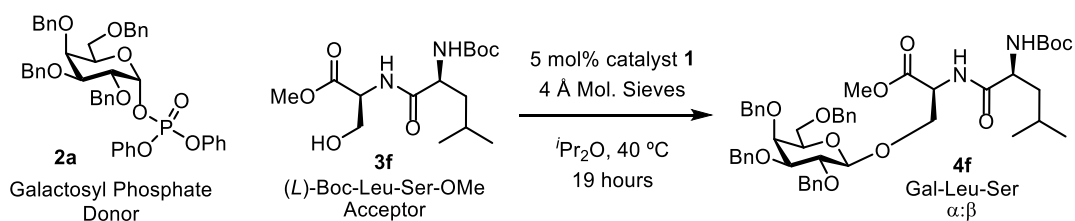

To a flame-dry 5 mL round bottom flask with a stir bar was charged 250 mg flame-dry 4 Å molecular sieves, 14 mg (0.0125 mmol) catalyst **1**, and 166 mg (0.500 mmol) BocLeuSerOMe (**3f**), and 2.5 mL of a 0.1 M solution of galactosyl phosphate donor (**2a**) in diisopropyl ether. Open to air, the flask was closed with a plastic cap and parafilm was used to seal the cap tightly. The mixture was then heated with efficient stirring at 40 °C in an oil bath for 19 hours over which time the mixture thickened. After 19 hours, the mixture is cooled to room temperature and 100  $\mu\text{L}$  aliquot is diluted with diethyl ether and filtered to remove the molecular sieves. This solution is concentrated and  $^1\text{H}$  NMR analysis on the crude mixture is used to determine the anomeric selectivity (88:12  $\beta:\alpha$ ). The mixture was then chromatographed directly with 50 g  $\text{SiO}_2$  using an ether/hexanes gradient on a Biotage MPLC to yield the product (**4f**) in 77% yield (165 mg, 0.193 mmol) product as a mixture of anomers.



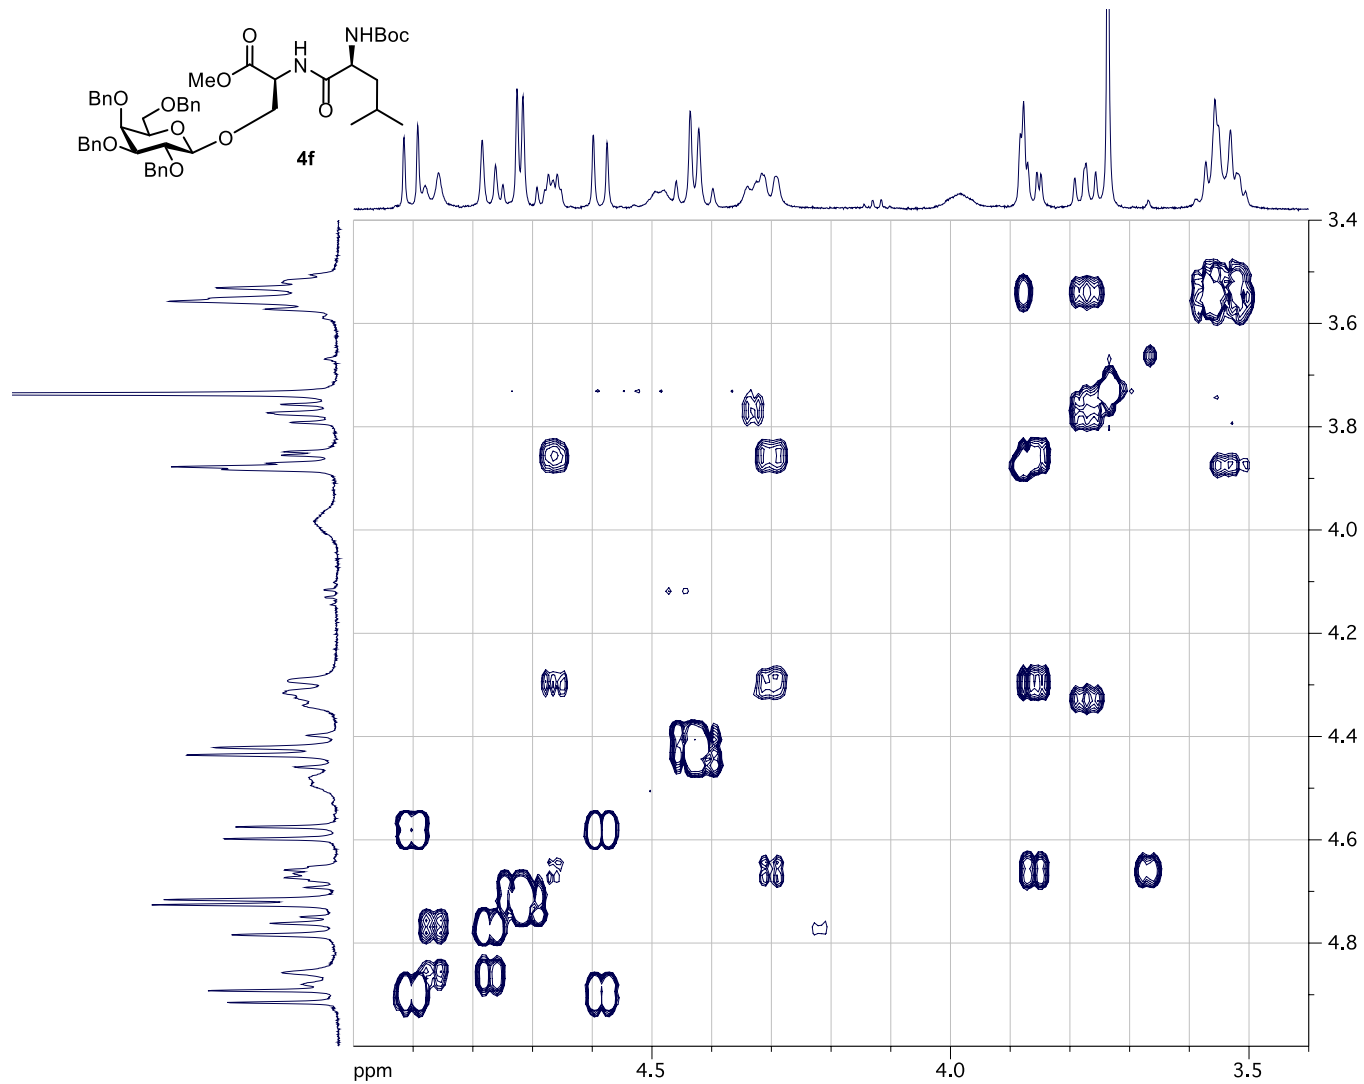

$^1\text{H}$ - $^1\text{H}$  COSY NMR (500 MHz) spectrum of **4f** in  $\text{CDCl}_3$

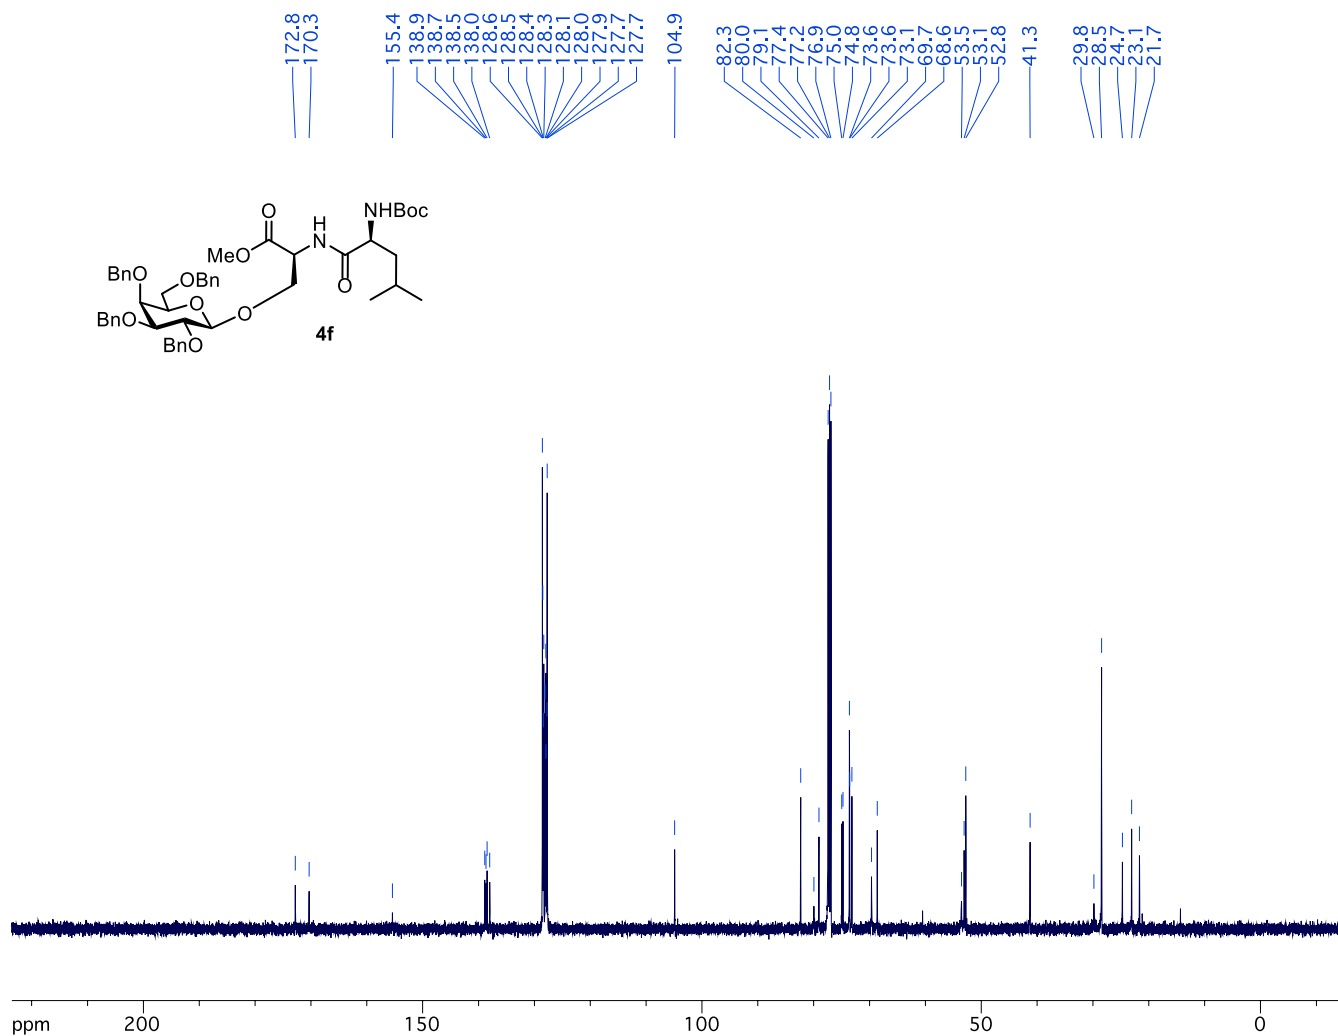

$^{13}\text{C}$  NMR (126 MHz) spectrum of **4e** in  $\text{CDCl}_3$ .

### Preparation of **3g**

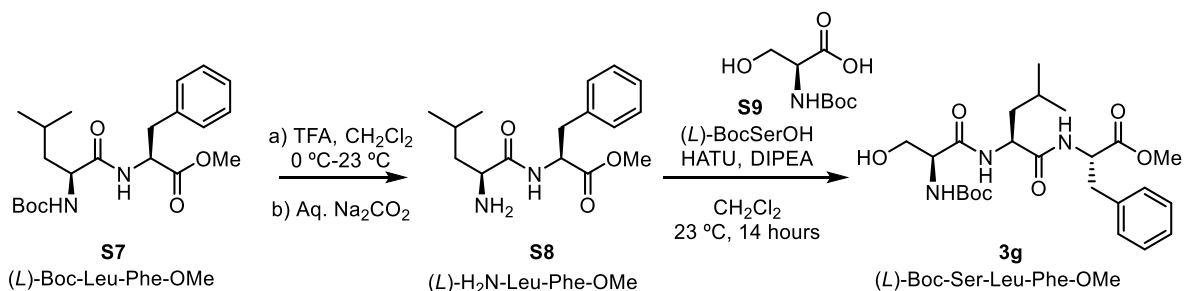

To a 25 mL round bottom flask was added (*L*)-Boc-Leu-Phe-OMe (**S7**) (0.226 g, 0.58 mmol, 1 equiv.) and 4 mL dry dichloromethane. The reaction was cooled to 0 °C, and to the cooled reaction was added 1.2 mL trifluoroacetic acid dropwise. The reaction was stirred at 0 °C for 15 min and warmed to rt. The reaction was stirred at rt for 1.5 hours. The reaction was cooled back to 0 °C and diluted with 8 mL dichloromethane. The reaction was quenched with sat.  $\text{Na}_2\text{CO}_3$  solution until pH is 12. The organic layer was separated, and the aqueous layer was extracted with dichloromethane twice. The combined organic layers were washed with brine and dried over  $\text{Na}_2\text{SO}_4$ . The organic layer was concentrated to afford the free amine, which was directly used without purification.



$^1\text{H}$  NMR (600 MHz) spectrum of **3g** in  $\text{CDCl}_3$

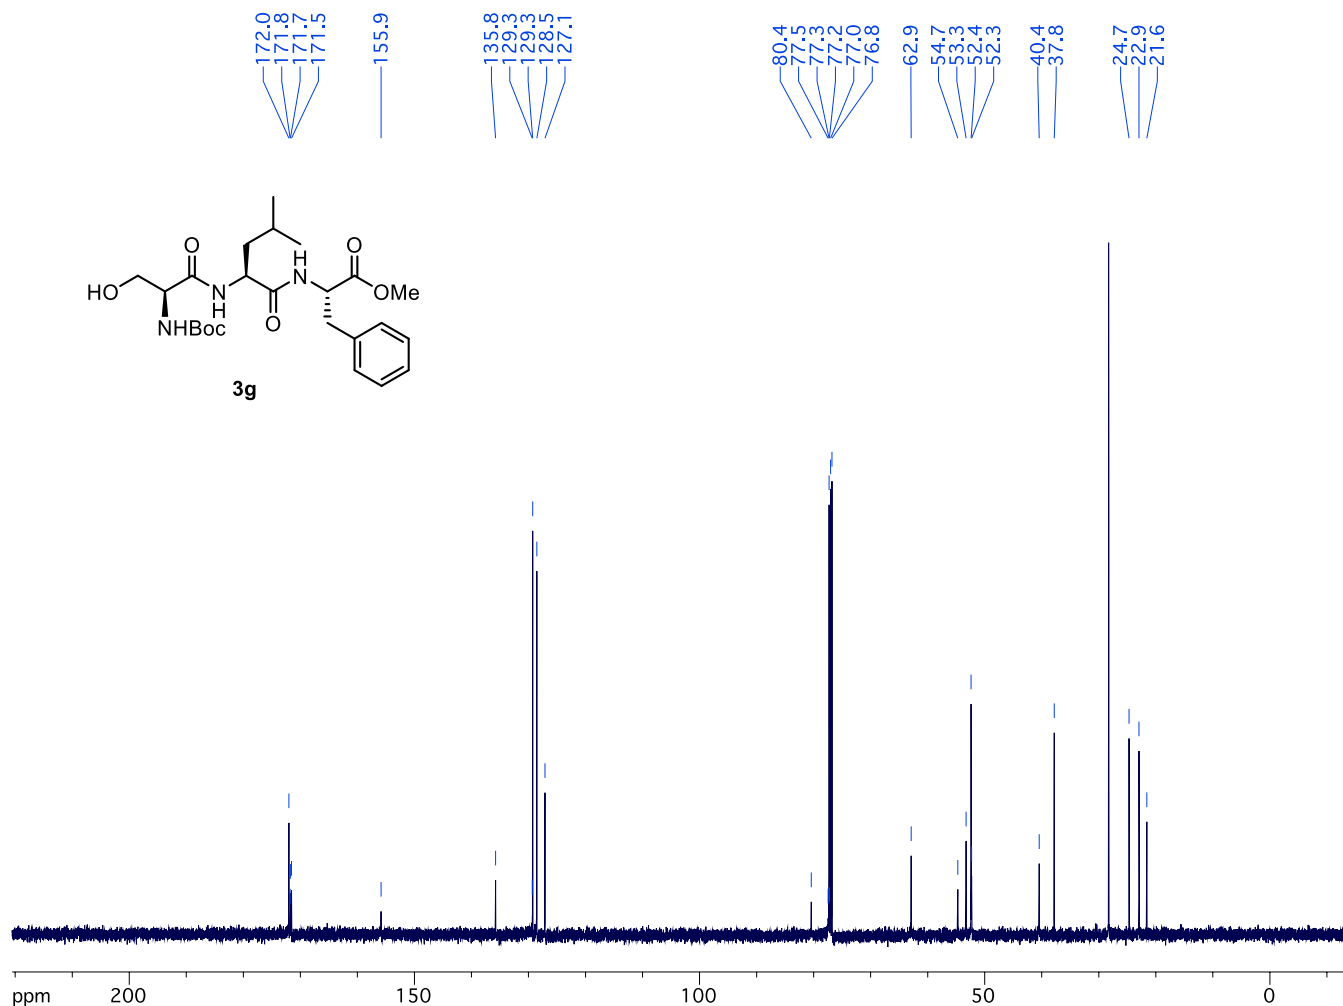

$^{13}\text{C}$  NMR (126 MHz) spectrum of **3f** in  $\text{CDCl}_3$ .

### Preparation of **4g**

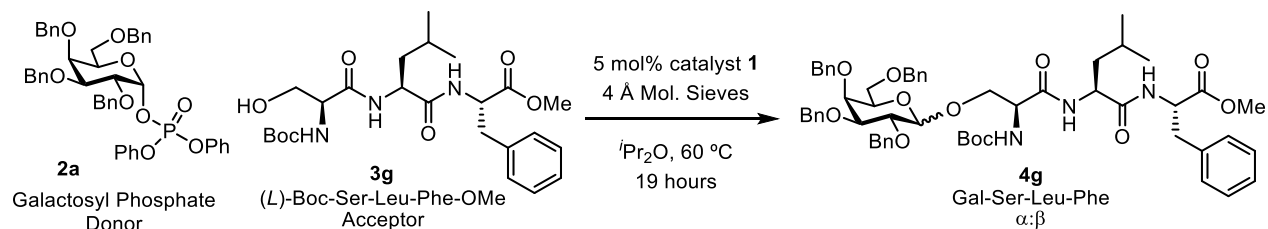

To a flame-dry 25 mL round bottom flask with a stir bar was charged 1.0 g flame-dry 4 Å molecular sieves, 14 mg (0.0125 mmol) catalyst **1**, and 120 mg (0.250 mmol) (*L*)-BocSerLeuPheOMe (**3g**), and 2.5 mL of a 0.1 M solution of galactosyl phosphate donor (**2a**) in diisopropyl ether. An additional 7.5 mL diisopropyl ether was added, bringing the total volume to 10.0 mL. Open to air, the flask was closed with a plastic cap and parafilm was used to seal the cap tightly. The mixture was then heated with efficient stirring at 60 °C in an oil bath for 19 hours over which time the mixture thickened. After 19 hours, the mixture is cooled to room temperature and 100  $\mu\text{L}$  aliquot is diluted with diethyl ether and filtered to remove the molecular sieves. This solution is concentrated and  $^1\text{H}$  NMR analysis on the crude mixture is used to determine the anomeric selectivity (89:11  $\beta$ : $\alpha$ ). The mixture

was then chromatographed directly with 50 g SiO<sub>2</sub> using an ether/hexanes gradient on a Biotage MPLC to yield the product (**4g**) in 30% yield (75 mg, 0.075 mmol) as a mixture of anomers.

<sup>1</sup>H-NMR (600 MHz, CDCl<sub>3</sub>): δ 7.37-6.98 (m, 28H), 5.53 (d, *J* = 6.0 Hz, 1H), 4.96 (d, *J* = 11.5 Hz, 1H), 4.77-4.62 (m, 5H), 4.55-4.53 (m, 2H), 4.46-4.42 (m, 3H), 4.36-4.32 (m, 1H), 3.95-3.85 (m, 3H), 3.73-3.66 (m, 3H), 3.61 (s, 3H), 3.54 (dd, *J* = 9.7, 2.9 Hz, 2H), 3.11 (dd, *J* = 13.7, 5.8 Hz, 1H), 2.96 (dd, *J* = 13.7, 7.0 Hz, 1H), 1.61-1.56 (m, *J* = 4.7 Hz, 1H), 1.53-1.47 (m, 1H), 1.43 (s, 9H), 1.37-1.31 (m, *J* = 4.6 Hz, 1H), 1.26 (s, 1H), 0.81 (t, *J* = 6.0 Hz, 6H).

<sup>13</sup>C-NMR (126 MHz, CDCl<sub>3</sub>): δ 171.63, 171.57, 169.76, 155.34, 138.72, 138.44, 138.39, 137.63, 136.38, 129.46, 128.61, 128.58, 128.53, 128.47, 128.42, 128.34, 128.01, 127.96, 127.86, 127.80, 127.66, 126.99, 106.01, 82.04, 80.13, 79.58, 75.22, 74.89, 73.72, 73.67, 73.54, 73.48, 73.43, 73.31, 71.76, 68.54, 53.59, 53.24, 52.52, 52.18, 40.56, 38.08, 28.42, 24.77, 23.07, 21.53.

HRMS-ESI (*m/z*): calculated for C<sub>58</sub>H<sub>71</sub>N<sub>3</sub>O<sub>12</sub> [M+H]<sup>+</sup>: 1002.5111, found: 1002.5109.

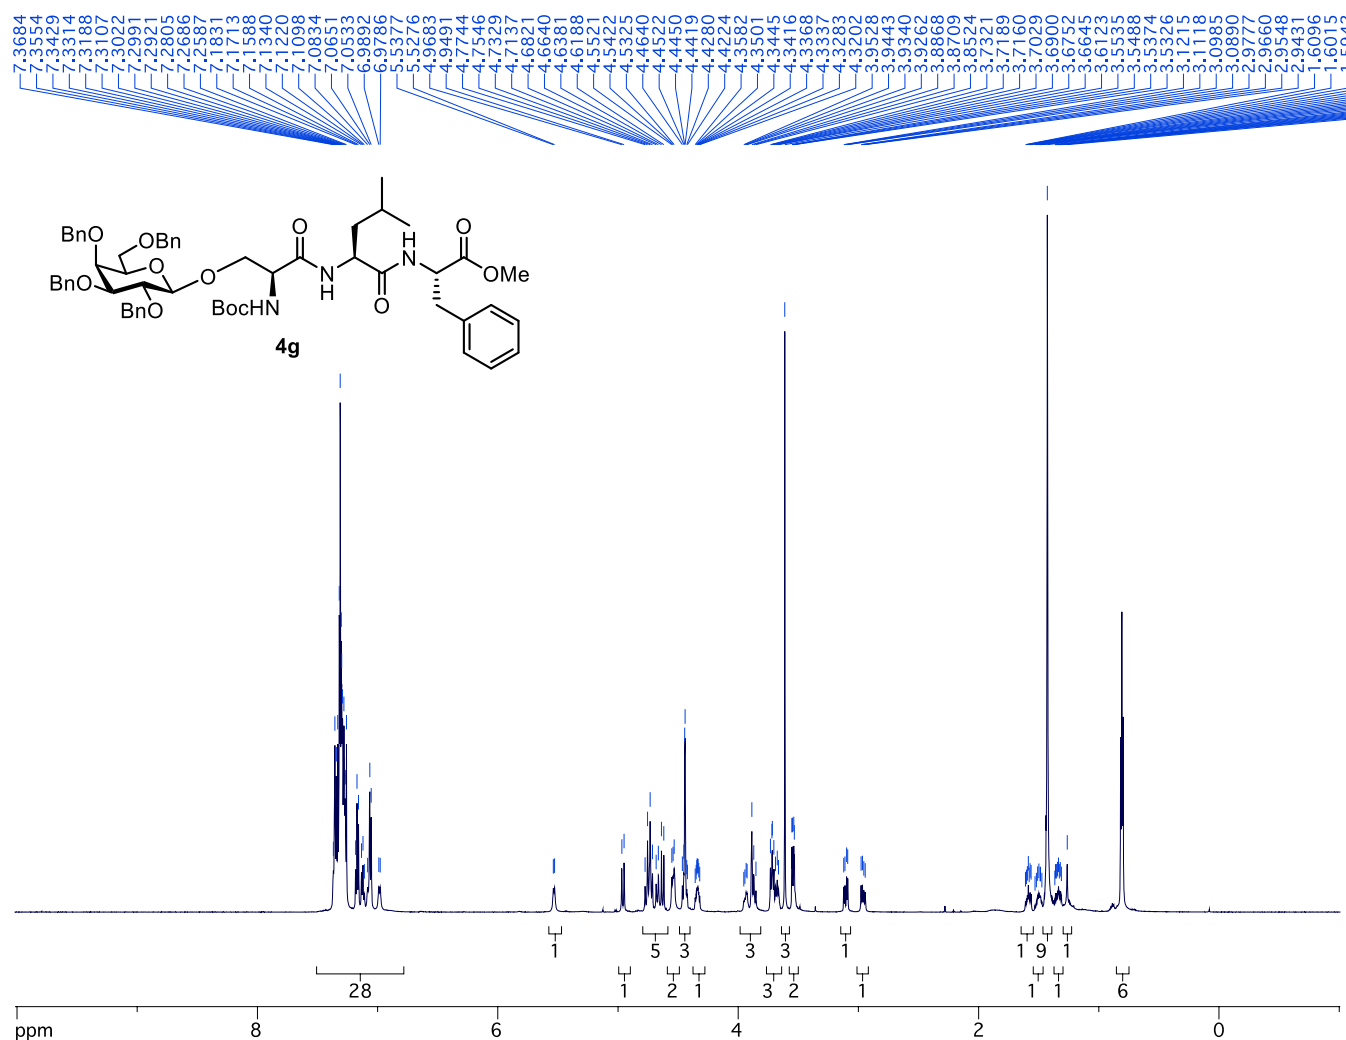

<sup>1</sup>H NMR (600 MHz) spectrum of **4g** in CDCl<sub>3</sub>

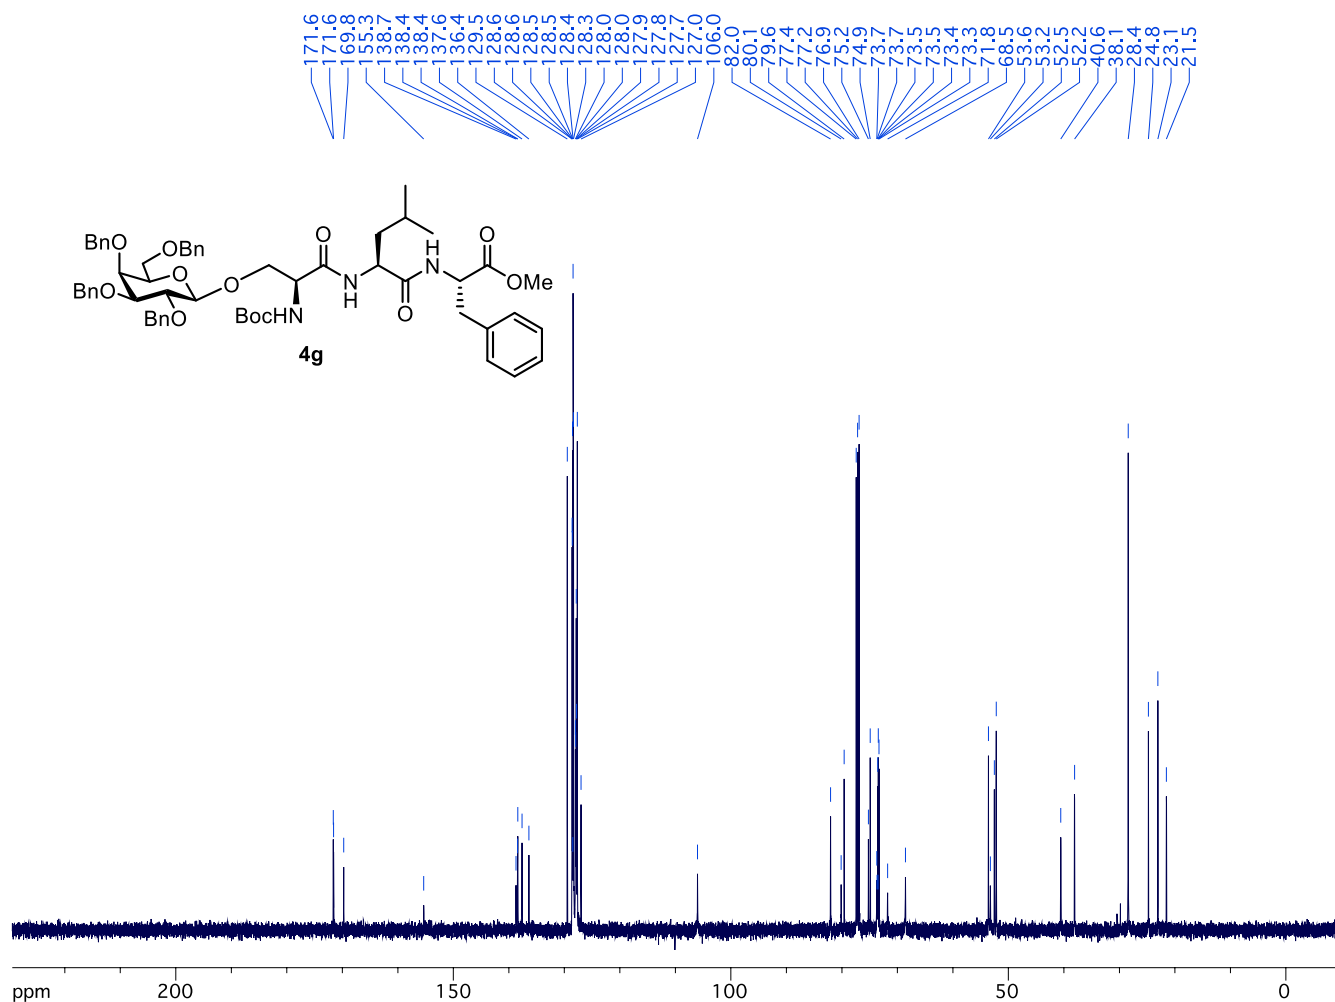

$^{13}\text{C}$  NMR (126 MHz) spectrum of **4g** in  $\text{CDCl}_3$ .

### Preparation of **4h**

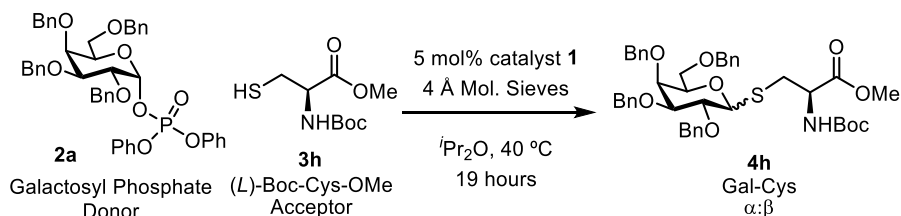

To a flame-dry 5 mL round bottom flask with a stir bar was charged 193 mg (0.250 mmol) galactosyl phosphate donor (**2a**), 250 mg flame-dry 4 Å molecular sieves, 14 mg (0.0125 mmol) catalyst **1**, and 110 mg (0.500 mmol)  $L$ -Boc-Cys-OMe (**3h**). 2.50 mL diisopropyl ether was added to the reaction mixture open to air and the flask was closed with a plastic cap and parafilm was used to seal the cap tightly. The mixture was then heated with efficient stirring at 40 °C in an oil bath for 19 hours over which time the mixture thickened. After 19 hours, the mixture is cooled to room temperature and 100  $\mu\text{L}$  aliquot is diluted with diethyl ether and filtered to remove the molecular sieves. This solution is concentrated and  $^1\text{H}$  NMR analysis on the crude mixture is used to determine the anomeric selectivity ( $\beta$ -only). The mixture was then chromatographed directly with 50 g  $\text{SiO}_2$  using an ether/hexanes gradient on a Biotage MPLC to yield the product (**4h**) in 91% yield (172 mg, 0.227 mmol) as a single anomer.



**<sup>1</sup>H-NMR** (600 MHz, CDCl<sub>3</sub>): δ 7.38-7.26 (m, 20H), 5.89 (d, *J* = 7.3 Hz, 1H), 4.95 (d, *J* = 11.7 Hz, 1H), 4.81 (q, *J* = 8.4 Hz, 2H), 4.73-4.68 (m, 2H), 4.63 (d, *J* = 11.7 Hz, 1H), 4.47-4.45 (m, 2H), 4.41-4.39 (m, 2H), 3.99 (d, *J* = 2.0 Hz, 1H), 3.81 (t, *J* = 9.4 Hz, 1H), 3.77 (s, ), 3.69 (s, 3H), 3.66 (d, *J* = 6.5 Hz, 2H), 3.56 (td, *J* = 11.6, 3.7 Hz, 2H), 3.16 (dd, *J* = 14.3, 4.1 Hz, 1H), 3.05 (dd, *J* = 14.3, 6.3 Hz, 1H), 1.45 (s, 1H), 1.41 (s, 9H).

**<sup>13</sup>C-NMR** (126 MHz, CDCl<sub>3</sub>): δ 171.49, 155.59, 138.71, 138.23, 138.07, 137.86, 128.48, 128.42, 128.38, 128.29, 127.93, 127.90, 127.84, 127.75, 127.58, 85.28, 83.95, 79.78, 77.85, 77.45, 77.41, 77.20, 76.95, 75.79, 74.58, 73.57, 73.38, 72.72, 68.34, 53.88, 52.44, 32.17, 28.44, 28.38.

**HRMS-ESI (m/z):** calculated for C<sub>43</sub>H<sub>51</sub>NO<sub>9</sub>S [M+H]<sup>+</sup>: 758.3357, found: 758.3354.

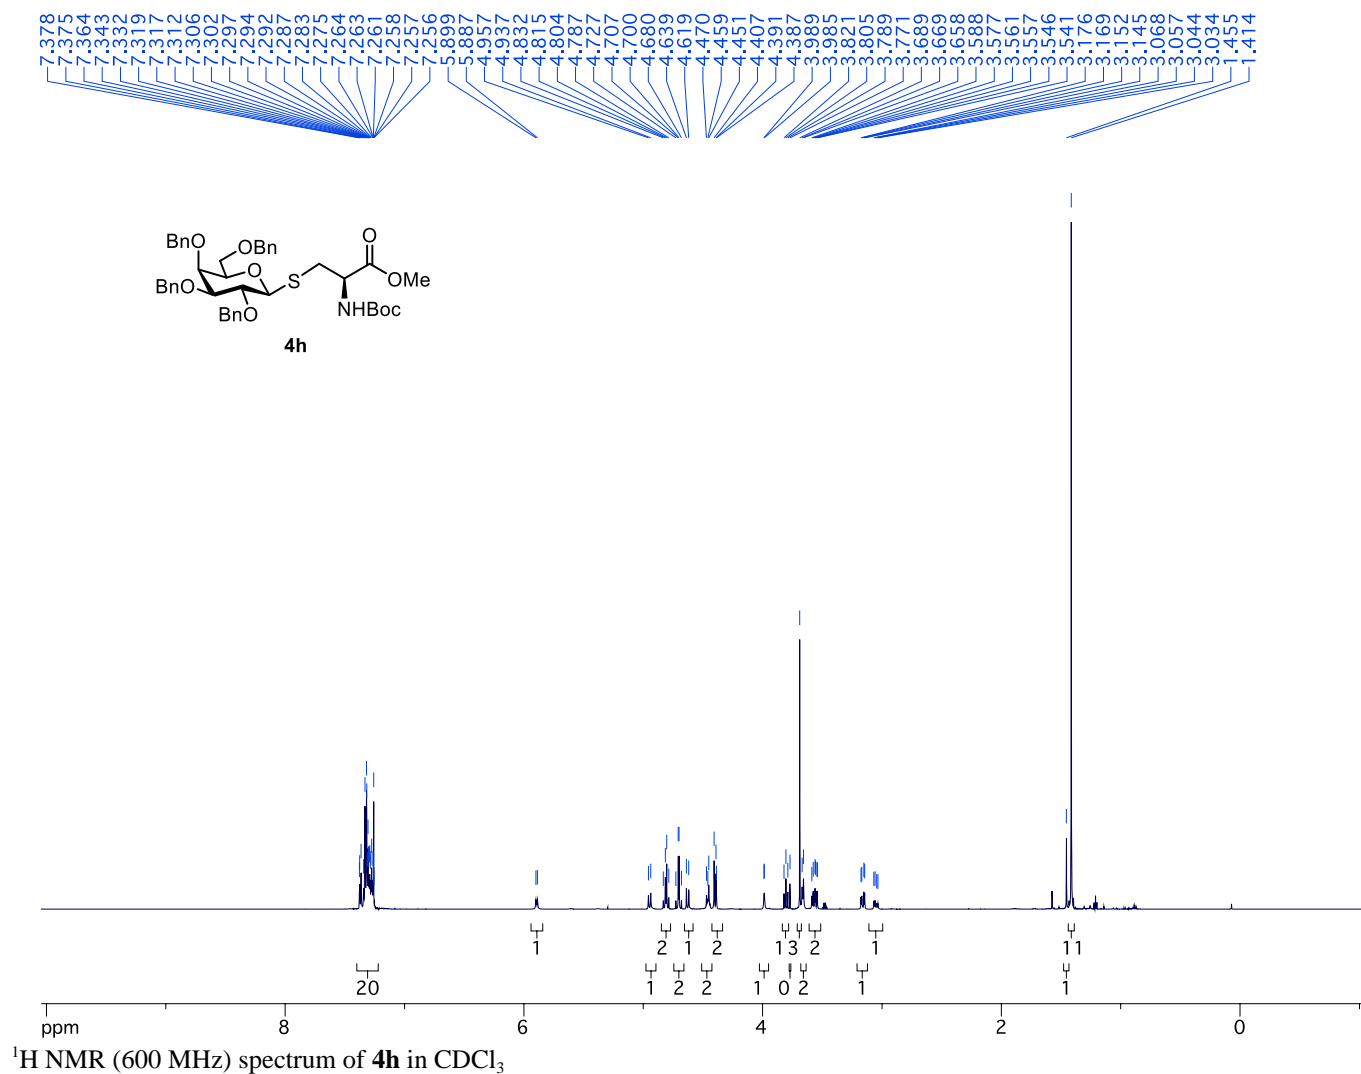

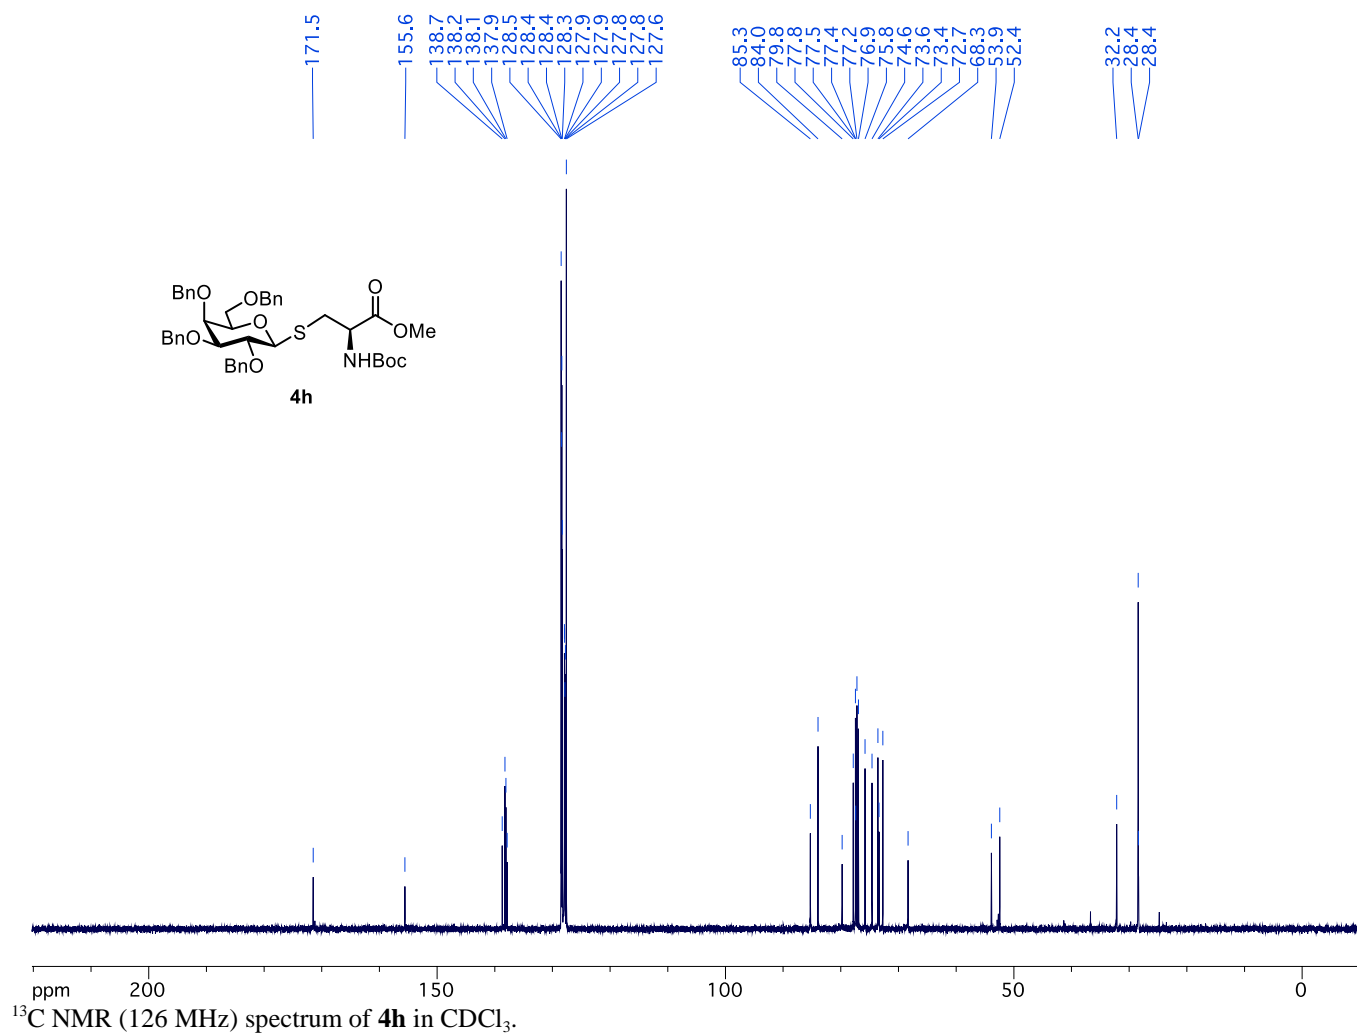

### Preparation of **4i**

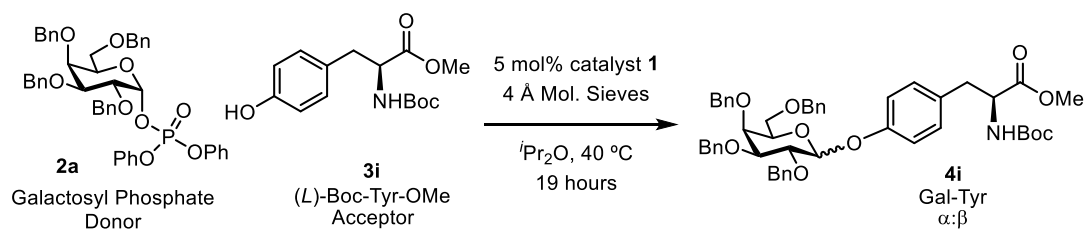

To a flame-dry 25 mL round bottom flask with a stir bar was charged 1.0 g flame-dry 4 Å molecular sieves, 14 mg (0.0125 mmol) catalyst **1**, 7.5 mL of diisopropyl ether, and 74 mg (0.250 mmol) (L)-BocTyrOMe (**3i**), and 2.5 mL of a 0.1 M solution of galactosyl phosphate donor (**2a**) in diisopropyl ether. Open to air, the flask was closed with a plastic cap and parafilm was used to seal the cap tightly. The mixture was then heated with efficient stirring at 40 °C in an oil bath for 19 hours over which time the mixture thickened. After 19 hours, the mixture is cooled to room temperature and 100 μL aliquot is diluted with diethyl ether and filtered to remove the molecular sieves. This solution is concentrated and <sup>1</sup>H NMR analysis on the crude mixture is used to determine the anomeric selectivity (86:14 β:α). The mixture was then chromatographed directly with 50 g SiO<sub>2</sub> using an ether/hexanes gradient on a Biotage MPLC to yield the product (**4i**) in 32% yield (65 mg, 0.080 mmol) as a mixture of anomers.

**4i- $\beta$  anomer:**

**$^1\text{H-NMR}$**  (600 MHz,  $\text{CDCl}_3$ ):  $\delta$  7.37-7.25 (m, 20H), 6.99 (q,  $J = 7.3$  Hz, 4H), 4.99-4.92 (m, 4H), 4.85 (d,  $J = 10.8$  Hz, 1H), 4.76 (q,  $J = 11.1$  Hz, 2H), 4.64 (d,  $J = 11.6$  Hz, 1H), 4.56-4.54 (m, 1H), 4.43 (q,  $J = 15.1$  Hz, 2H), 4.10 (t,  $J = 8.3$  Hz, 1H), 3.95 (s, 1H), 3.68-3.66 (m, 4H), 3.63-3.60 (m, 3H), 3.06-2.98 (m, 2H), 1.42 (s, 9H).

**$^{13}\text{C-NMR}$**  (126 MHz,  $\text{CDCl}_3$ ):  $\delta$  172.52, 156.73, 155.23, 138.68, 138.62, 138.51, 137.99, 130.37, 130.00, 128.57, 128.54, 128.47, 128.43, 128.36, 128.32, 128.14, 128.00, 127.95, 127.91, 127.77, 127.72, 127.70, 127.64, 117.18, 102.15, 82.24, 79.34, 75.54, 74.70, 73.95, 73.75, 73.49, 73.22, 68.96, 54.60, 52.33, 37.70, 28.46.

**HRMS-ESI (m/z)**: calculated for  $\text{C}_{49}\text{H}_{55}\text{NO}_{10}$   $[\text{M}+\text{H}]^+$ : 818.3899, found: 818.3878.

**4i- $\alpha$  anomer:**

**$^1\text{H-NMR}$**  (600 MHz,  $\text{CDCl}_3$ ):  $\delta$  7.43-7.20 (m, 20H), 7.01 (s, 4H), 5.46 (d,  $J = 3.1$  Hz, 1H), 4.99-4.95 (m, 2H), 4.90 (d,  $J = 11.6$  Hz, 1H), 4.82 (dd,  $J = 20.5, 11.8$  Hz, 2H), 4.71 (d,  $J = 12.0$  Hz, 1H), 4.60 (d,  $J = 11.4$  Hz, 1H), 4.56 (q,  $J = 6.6$  Hz, 1H), 4.40 (d,  $J = 11.6$  Hz, 1H), 4.35 (d,  $J = 11.6$  Hz, 1H), 4.20-4.13 (m, 2H), 4.09-4.07 (m, 2H), 3.71 (s, 3H), 3.59 (t,  $J = 8.3$  Hz, 1H), 3.48 (dd,  $J = 9.2, 5.6$  Hz, 1H), 3.03 (qd,  $J = 15.7, 5.7$  Hz, 2H), 1.43 (s, 9H).

**$^{13}\text{C-NMR}$**  (126 MHz,  $\text{CDCl}_3$ ):  $\delta$  172.54, 156.43, 155.25, 138.90, 138.75, 138.52, 138.02, 130.38, 129.84, 128.51, 128.48, 128.38, 128.33, 128.06, 127.88, 127.83, 127.80, 127.72, 127.65, 127.59, 117.40, 96.75, 80.07, 79.08, 76.34, 75.07, 75.01, 73.54, 73.51, 73.34, 70.12, 68.70, 54.61, 52.33, 37.66, 28.45.

**HRMS-ESI (m/z)**: calculated for  $\text{C}_{49}\text{H}_{55}\text{NO}_{10}$   $[\text{M}+\text{H}]^+$ : 818.3899, found: 818.3889.

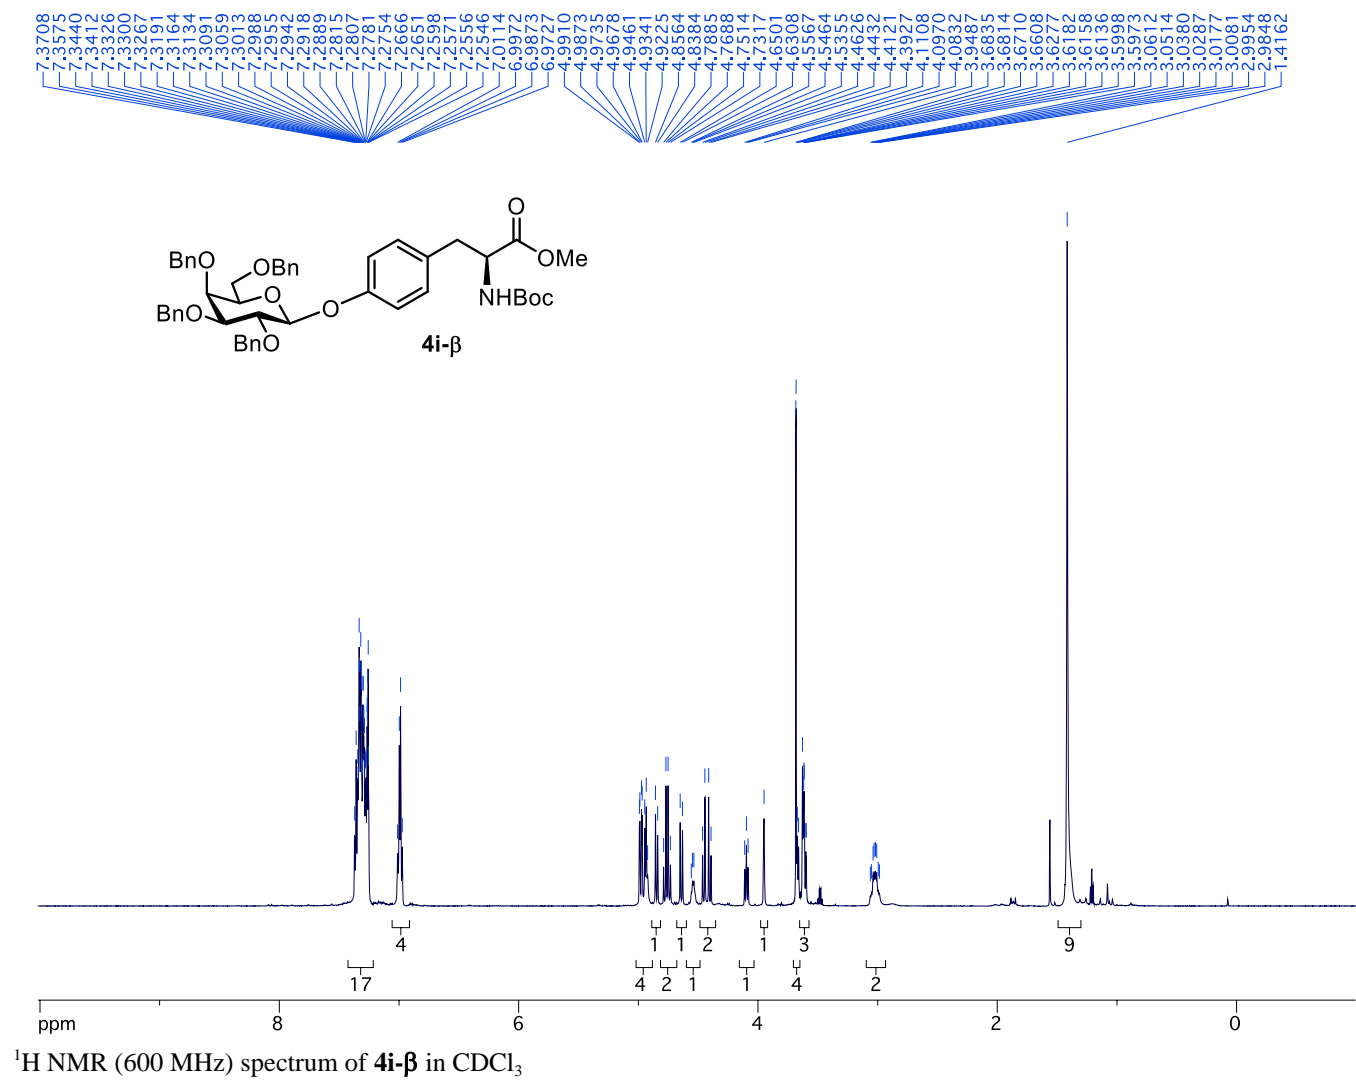

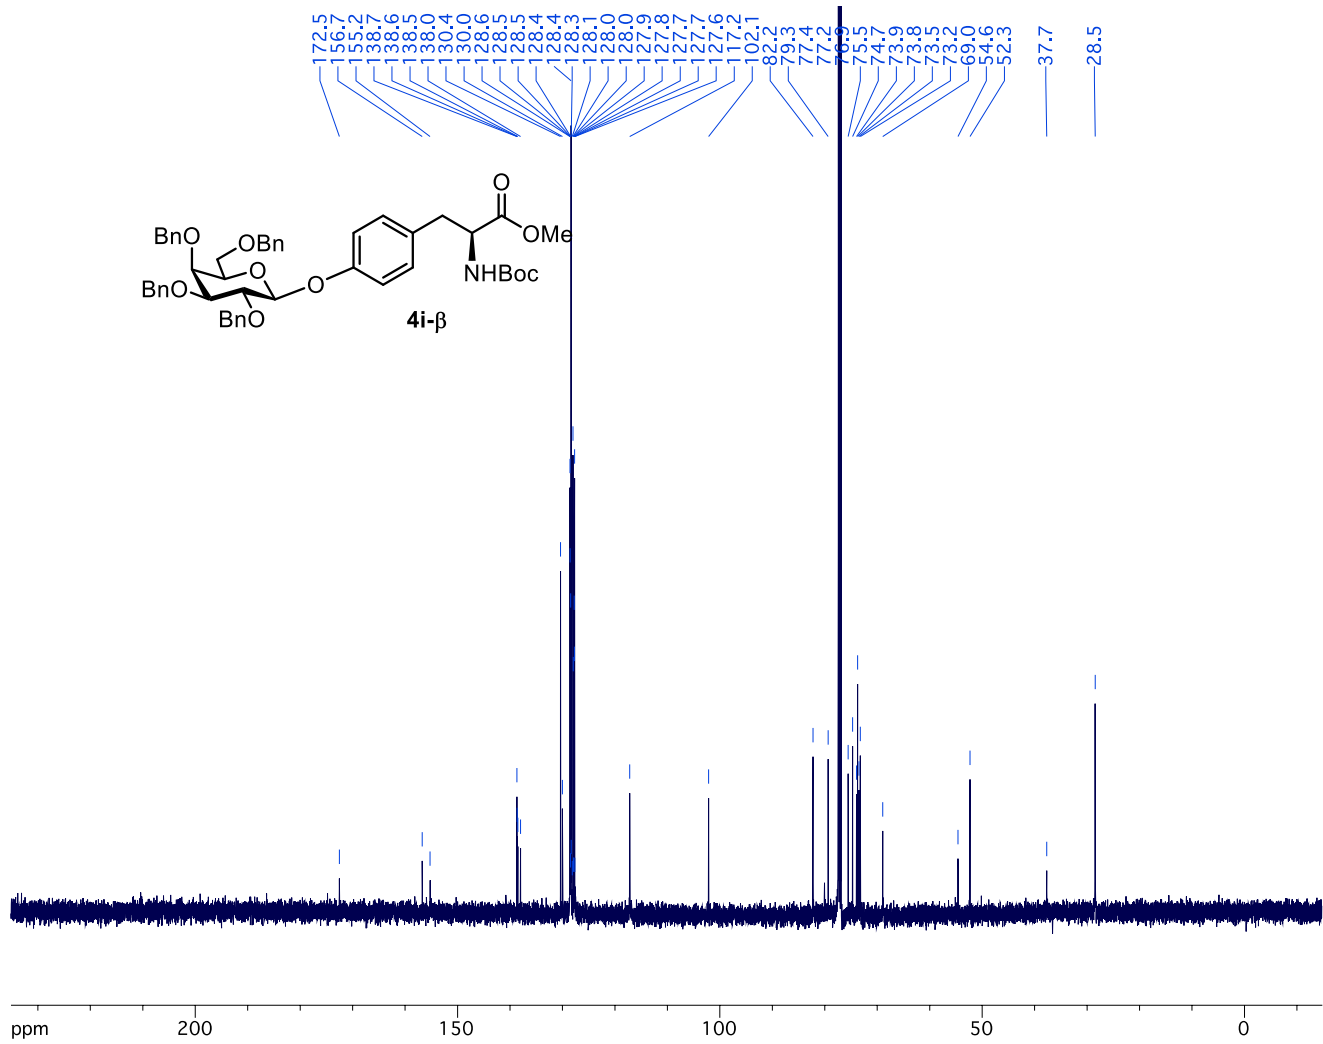

<sup>13</sup>C NMR (126 MHz) spectrum of **4i-β** in CDCl<sub>3</sub>.

7.4290  
7.4157  
7.3901  
7.3786  
7.3694  
7.3573  
7.3475  
7.3388  
7.3293  
7.3193  
7.3093  
7.2976  
7.2907  
7.2890  
7.2803  
7.2781  
7.2684  
7.2620  
7.2572  
7.2552  
7.2459  
7.2030  
7.0057  
5.4610  
5.4559  
4.9910  
4.9721  
4.9642  
4.9505  
4.9138  
4.8945  
4.8501  
4.8301  
4.8157  
4.7963  
4.7722  
4.6973  
4.6045  
4.5856  
4.5716  
4.5613  
4.5493  
4.5392  
4.4985  
4.3901  
4.3824  
4.3241  
4.2757  
4.2627  
4.1958  
4.1753  
4.1533  
4.1504  
4.1364  
4.1336  
4.1255  
4.0930  
4.0818  
4.0712  
3.7078  
3.6063  
3.5244  
3.5285  
3.4946  
3.4853  
3.4793  
3.4700  
3.0743  
3.0648  
3.0513  
3.0419  
3.0220  
3.0124  
2.9990  
2.9890  
1.4268

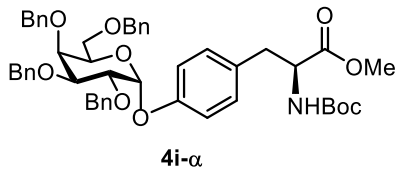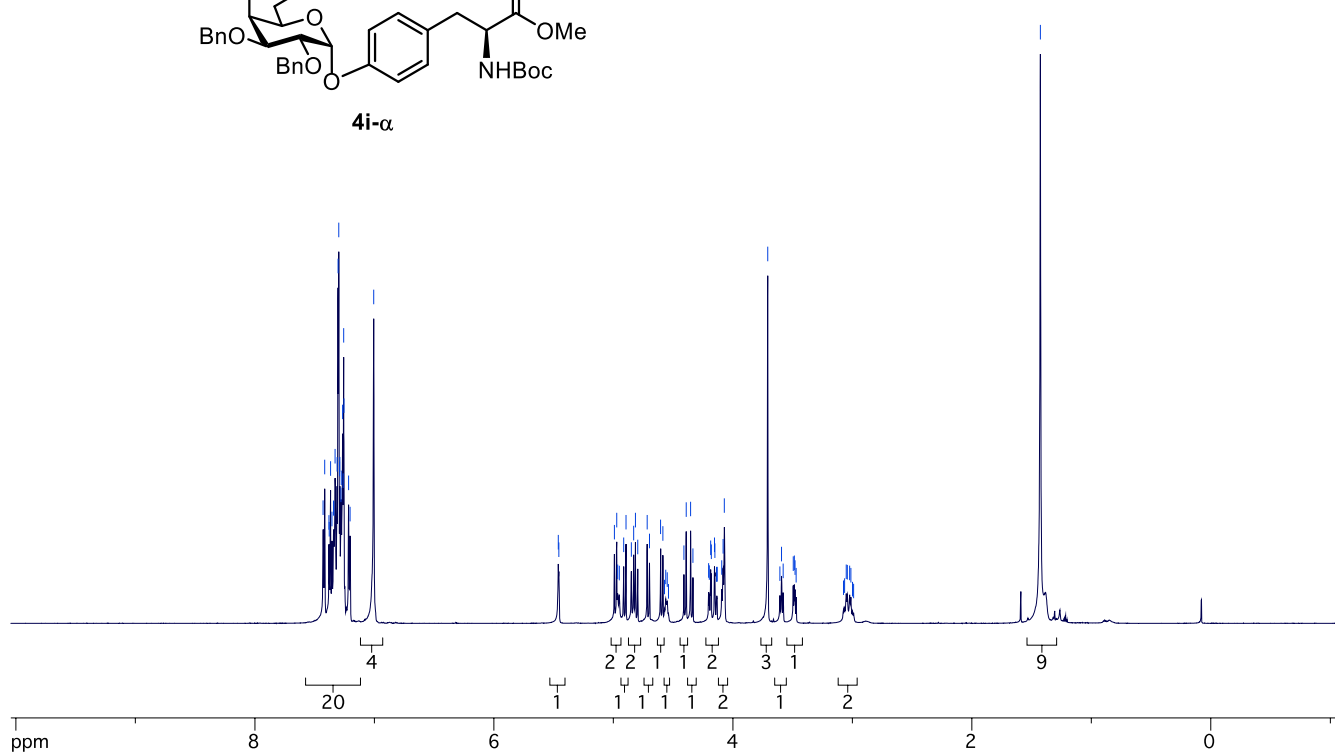

<sup>1</sup>H NMR (600 MHz) spectrum of **4i-α** in CDCl<sub>3</sub>

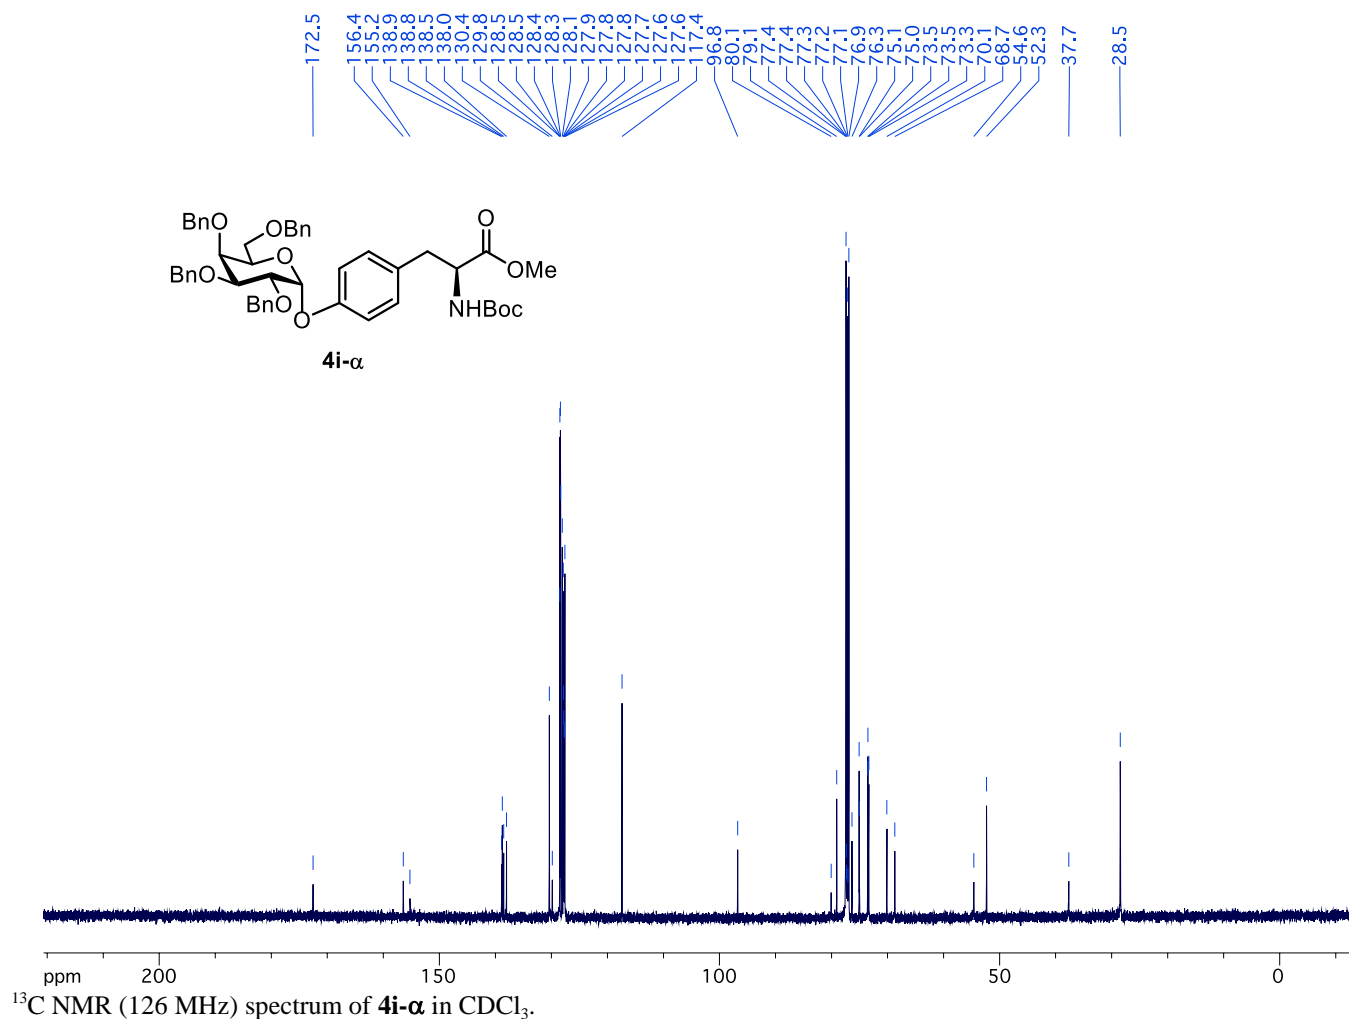

### Preparation of **4m**

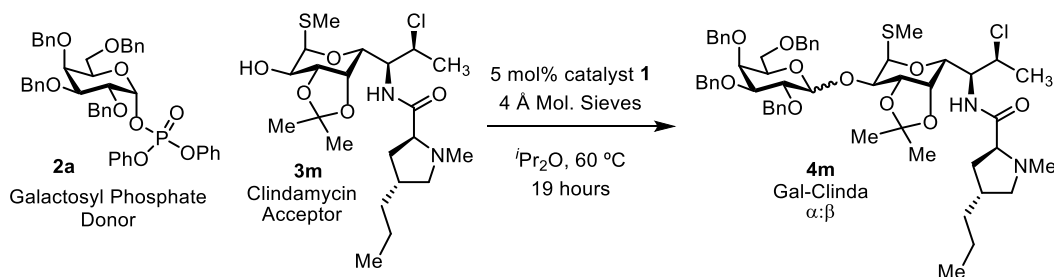

To a flame-dry 25 mL round bottom flask with a stir bar was charged 1.0 g flame-dry 4 Å molecular sieves, 14 mg (0.0125 mmol) catalyst **1**, 7.5 mL of diisopropyl ether, and 116 mg (0.250 mmol) clindamycin acetonide (**3m**), and 2.5 mL of a 0.1 M solution of galactosyl phosphate donor (**2a**) in diisopropyl ether. Open to air, the flask was closed with a plastic cap and parafilm was used to seal the cap tightly. The mixture was then heated with efficient stirring at 60 °C in an oil bath for 19 hours over which time the mixture thickened. After 19 hours, the mixture is cooled to room temperature and 100 μL aliquot is diluted with diethyl ether and filtered to remove the molecular sieves. This solution is concentrated and <sup>1</sup>H NMR analysis on the crude mixture is used to determine the anomeric selectivity (82:18 β:α). The mixture was then chromatographed directly with 50 g SiO<sub>2</sub> using an ether/hexanes gradient on a Biotage MPLC to yield the product (**4m**) in 34% yield (84 mg, 0.085 mmol) as a mixture of anomers. Further purification of anomeric mixture was conducted with reverse-phase HPLC using a C<sub>18</sub> Sunfire preparatory

column and an acetonitrile/water mobile phase (0.1% formic acid added) on a 30% to 80% gradient to provide the formate salt of the  $\beta$ -product (**4m•HCOOH**)

**<sup>1</sup>H-NMR** (600 MHz, CD<sub>3</sub>OD):  $\delta$  8.46 (s, 1H), 7.41-7.23 (m, 20H), 5.33 (d,  $J$  = 5.0 Hz, 1H), 5.01 (d,  $J$  = 10.9 Hz, 1H), 4.84 (d,  $J$  = 11.3 Hz, 1H), 4.79 (d,  $J$  = 7.7 Hz, 1H), 4.73-4.67 (m, 3H), 4.61-4.57 (m, 2H), 4.53 (d,  $J$  = 11.5 Hz, 2H), 4.45 (q,  $J$  = 9.0 Hz, 2H), 4.22 (qd,  $J$  = 9.2, 5.0 Hz, 2H), 4.17 (dd,  $J$  = 4.9, 2.5 Hz, 1H), 3.90 (d,  $J$  = 2.9 Hz, 1H), 3.68 (dd,  $J$  = 9.7, 7.8 Hz, 1H), 3.62 (t,  $J$  = 6.1 Hz, 1H), 3.59-3.55 (m, 2H), 3.52 (dd,  $J$  = 9.5, 5.7 Hz, 1H), 3.33 (dd,  $J$  = 8.8, 6.1 Hz, 1H), 3.25 (dd,  $J$  = 10.3, 5.3 Hz, 1H), 2.50 (s, 3H), 2.27-2.18 (m, 3H), 2.10 (s, 3H), 2.02-1.91 (m, 2H), 1.43 (d,  $J$  = 5.7 Hz, 7H), 1.40-1.29 (m, 5H), 1.28-1.25 (m, 4H), 0.91 (t,  $J$  = 7.1 Hz, 3H).

**<sup>13</sup>C-NMR** (126 MHz, CD<sub>3</sub>OD):  $\delta$  175.04, 140.22, 139.97, 139.90, 139.43, 129.46, 129.41, 129.38, 129.34, 129.24, 129.21, 129.12, 129.00, 128.85, 128.76, 128.66, 128.61, 128.50, 110.32, 104.78, 86.84, 83.00, 80.38, 77.23, 77.21, 75.88, 75.77, 75.60, 74.80, 74.56, 74.34, 74.16, 70.28, 69.71, 67.80, 63.35, 59.76, 54.38, 49.51, 49.34, 49.17, 49.00, 48.83, 48.66, 48.49, 41.70, 38.88, 38.26, 36.75, 28.58, 26.87, 22.98, 22.49, 14.57, 13.33.

**HRMS-ESI (m/z):** calculated for C<sub>55</sub>H<sub>71</sub>ClN<sub>2</sub>O<sub>10</sub>S [M+H]<sup>+</sup>: 987.4591, found: 987.4590.

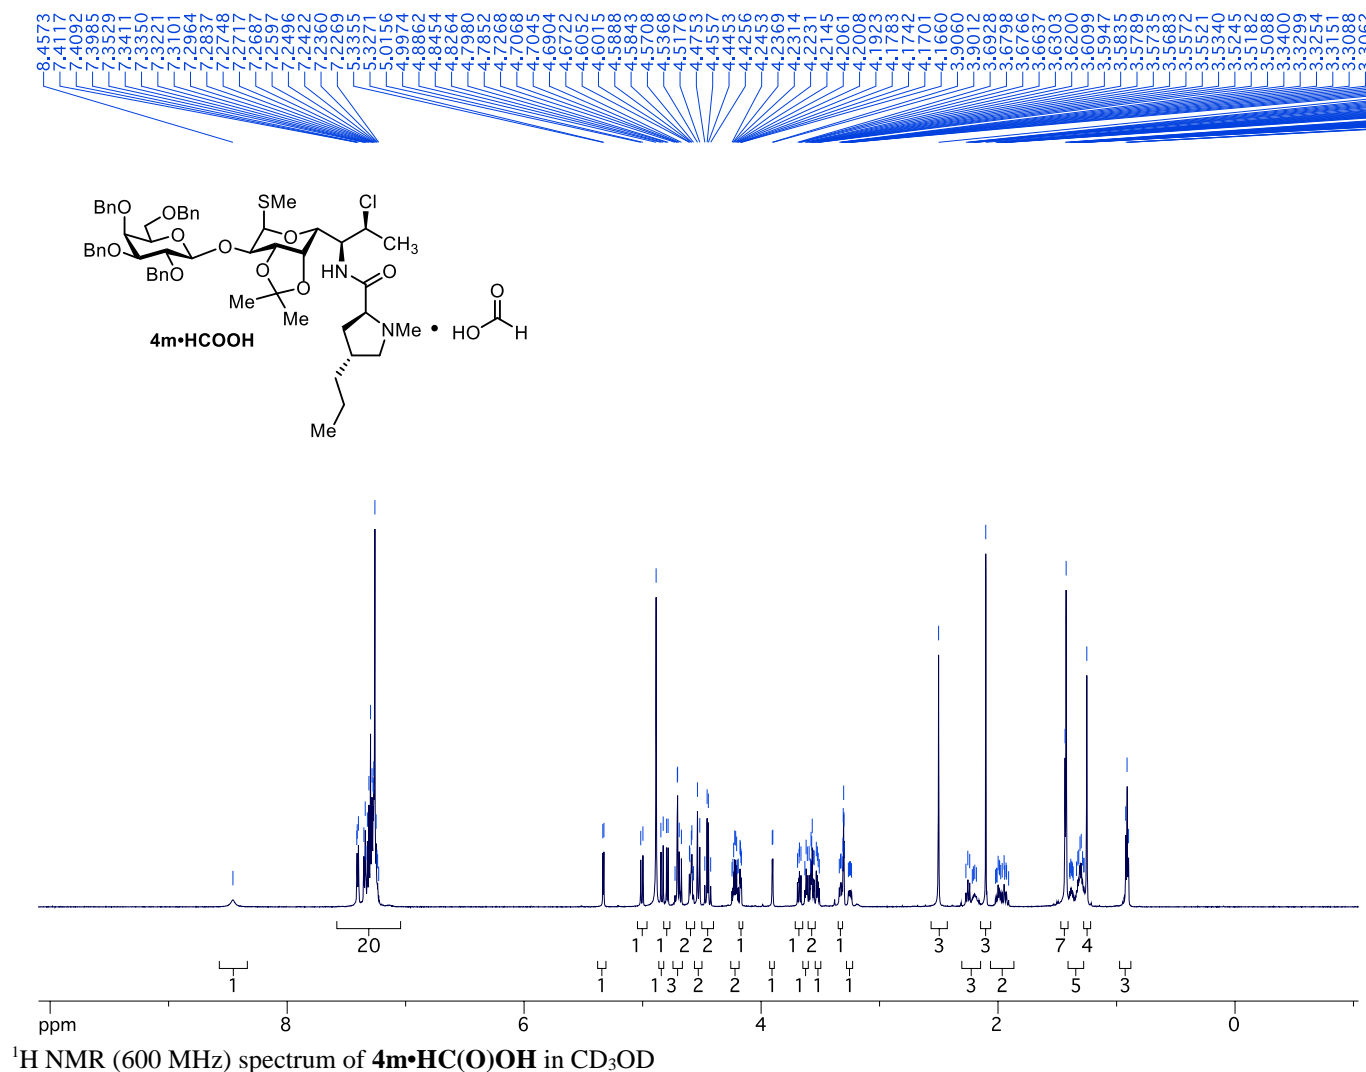



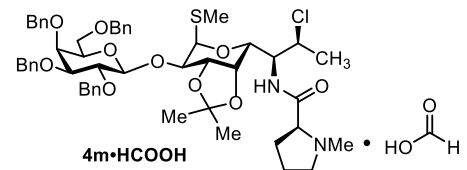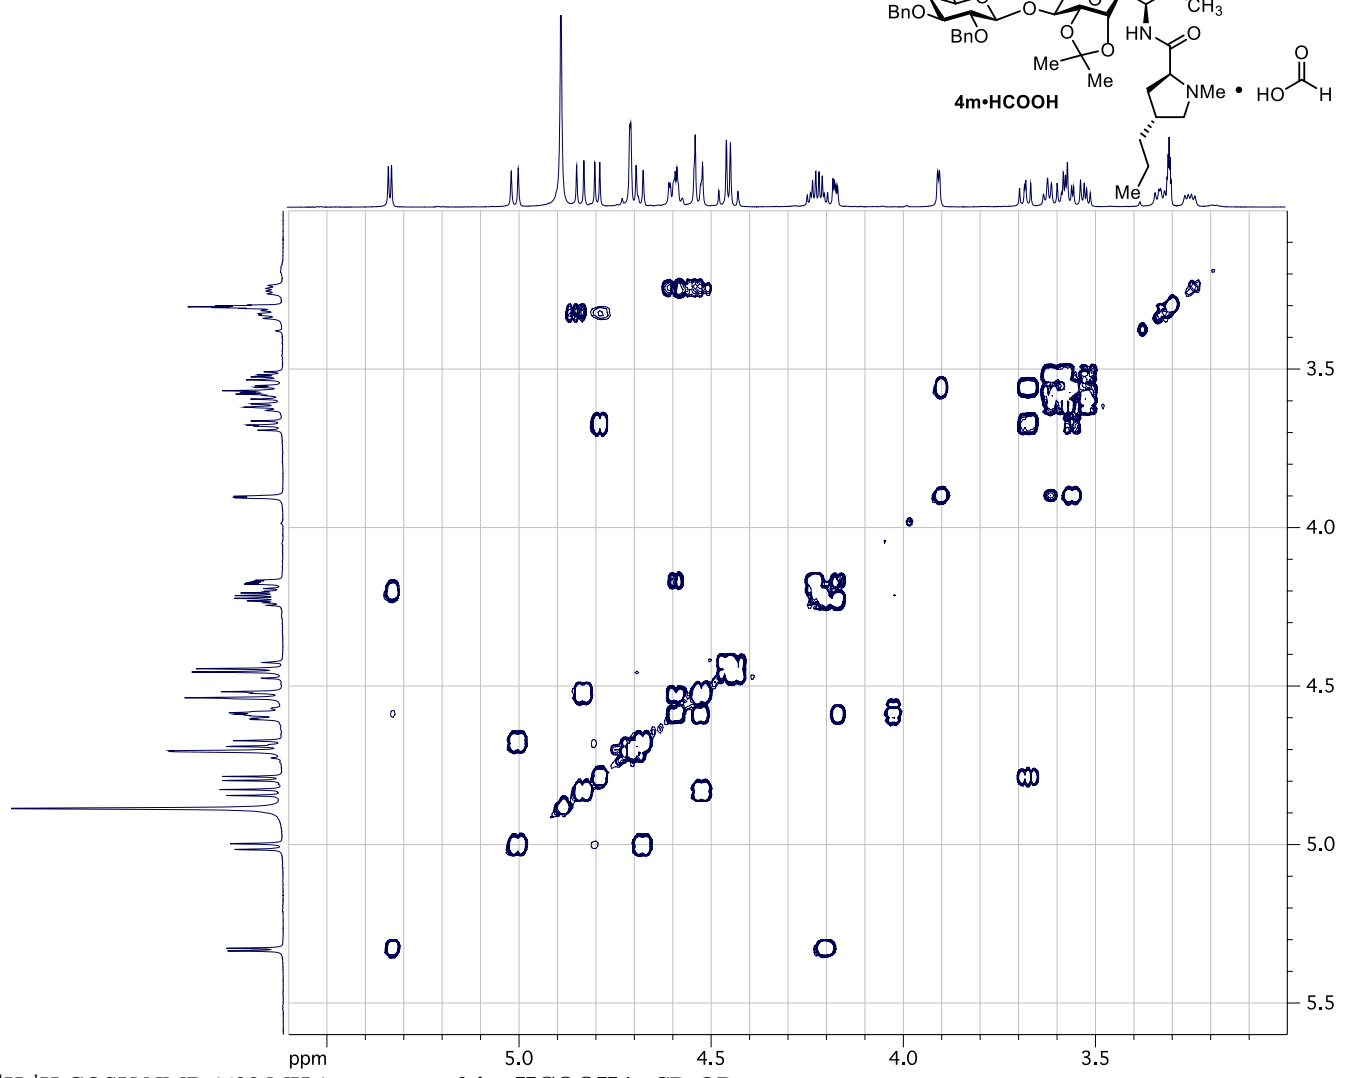

<sup>1</sup>H-<sup>1</sup>H COSY NMR (600 MHz) spectrum of **4m•HCOOH** in CD<sub>3</sub>OD

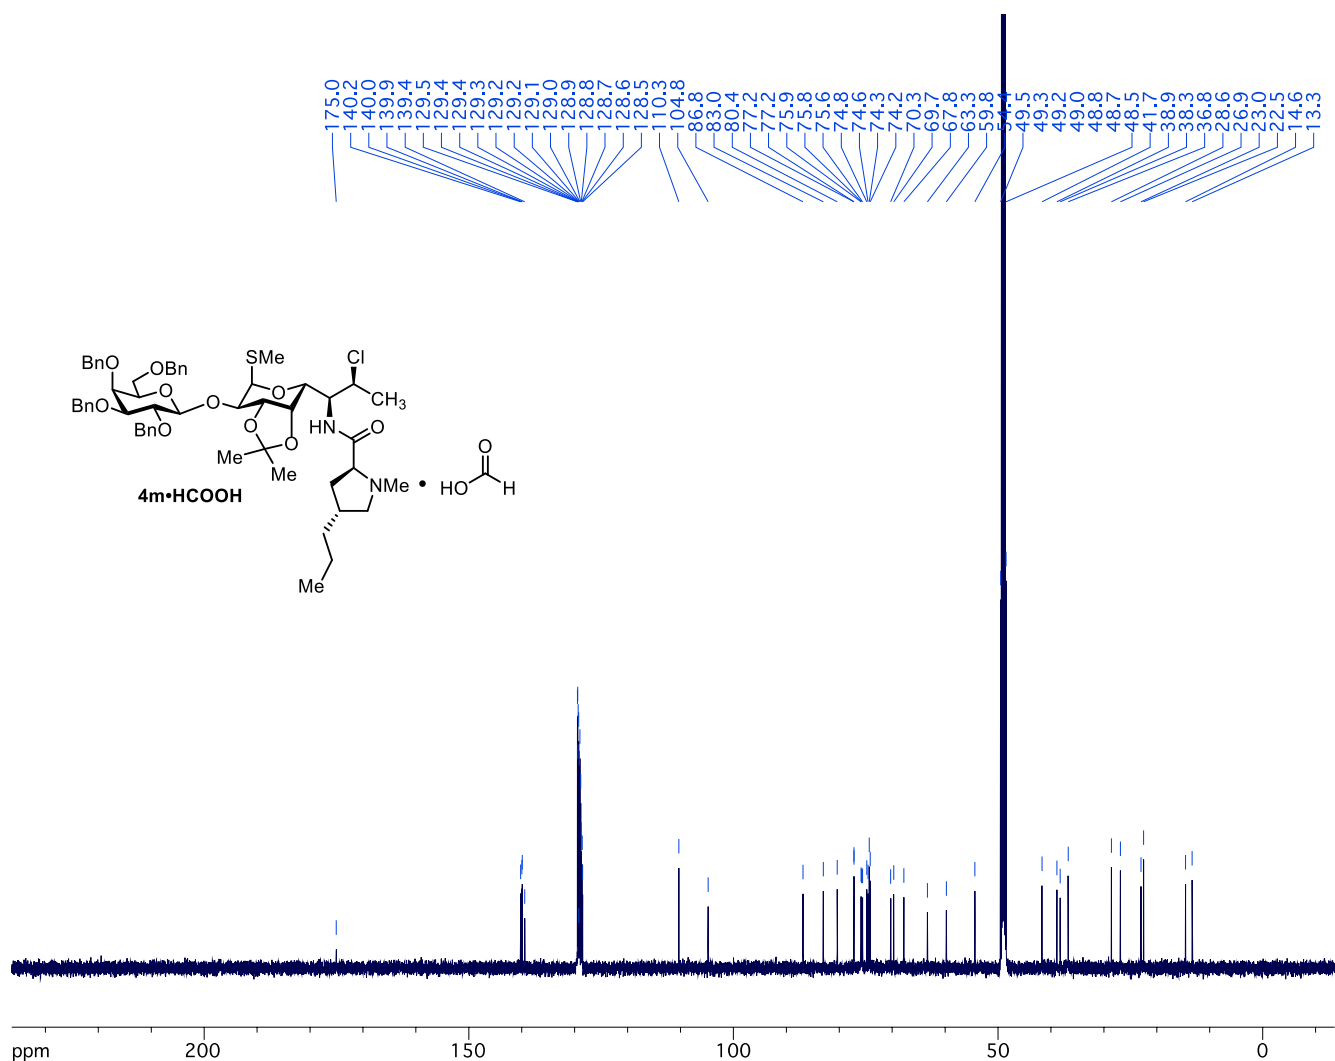

$^{13}\text{C}$  NMR (126 MHz) spectrum of **4m•HCOOH** in  $\text{CD}_3\text{OD}$ .

### Preparation of **5i**

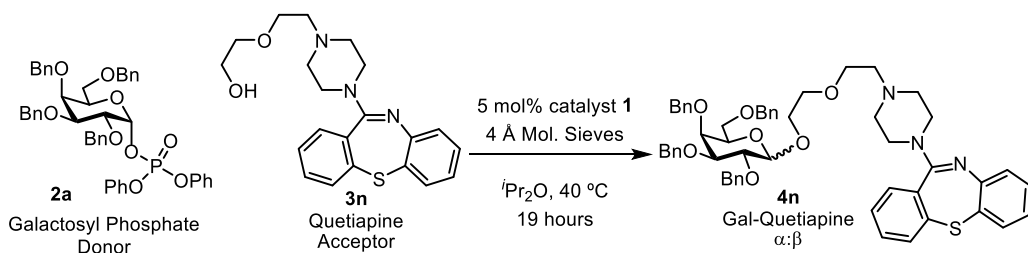

To a flame-dry 25 mL round bottom flask with a stir bar was charged 1.0 g flame-dry 4 Å molecular sieves, 14 mg (0.0125 mmol) catalyst **1**, and 96 mg (0.25 mmol) quetiapine (**3n**), and 2.5 mL of a 0.1 M solution of galactosyl phosphate donor (**2a**) in diisopropyl ether. 7.5 mL diisopropyl ether was additionally added to the reaction mixture (10 mL total volume, 0.025 M) open to air and the flask was closed with a plastic cap and parafilm was used to seal the cap tightly. The mixture was then heated with efficient stirring at 40 °C in an oil bath for 19 hours over which time the mixture thickened. After 19 hours, the mixture is cooled to room temperature and 100  $\mu\text{L}$  aliquot is diluted with diethyl ether and filtered to remove the molecular sieves. This solution is concentrated and  $^1\text{H}$  NMR analysis on the crude mixture is used to determine the anomeric selectivity (98:2  $\beta:\alpha$ ). The mixture

was then chromatographed directly with 50 g SiO<sub>2</sub> using an ether/hexanes gradient on a Biotage MPLC to yield the product (**4n**) in 72% yield (166 mg, 0.183 mmol) as a mixture of anomers.

<sup>1</sup>H-NMR (600 MHz, CDCl<sub>3</sub>): δ 7.49 (d, *J* = 7.6 Hz, 1H), 7.39-7.24 (m, 24H), 7.17-7.14 (m, 1H), 7.06 (d, *J* = 8.0 Hz, 1H), 6.87 (td, *J* = 7.5, 1.4 Hz, 1H), 4.93 (m, *J* = 3.0 Hz, 2H), 4.75-4.69 (m, 3H), 4.61 (dd, *J* = 11.7, 1.4 Hz, 1H), 4.45-4.38 (m, 3H), 4.02-3.99 (m, 1H), 3.88 (t, *J* = 1.4 Hz, 1H), 3.81 (dd, *J* = 9.7, 7.7 Hz, 1H), 3.73 (m, *J* = 4.3, 2.2 Hz, 1H), 3.69-3.64 (m, 2H), 3.62 (t, *J* = 5.8 Hz, 2H), 3.58-3.57 (m, 2H), 3.53-3.49 (m, 3H), 2.58 (t, *J* = 5.8 Hz, 3H), 2.48 (s, 2H).

<sup>13</sup>C-NMR (126 MHz, CDCl<sub>3</sub>): δ 160.75, 160.74, 149.00, 139.92, 138.89, 138.66, 138.56, 137.94, 134.18, 132.20, 132.15, 130.74, 129.10, 129.03, 128.46, 128.38, 128.36, 128.28, 128.26, 128.20, 128.17, 128.00, 127.91, 127.82, 127.57, 125.37, 122.76, 104.13, 82.18, 79.50, 75.05, 74.54, 73.57, 73.53, 73.43, 73.11, 70.29, 68.98, 68.96, 68.88, 57.94, 53.42, 53.38.

HRMS-ESI (*m/z*): calculated for C<sub>55</sub>H<sub>59</sub>N<sub>3</sub>O<sub>7</sub>S [M+H]<sup>+</sup>: 906.4146, found: 906.4148.

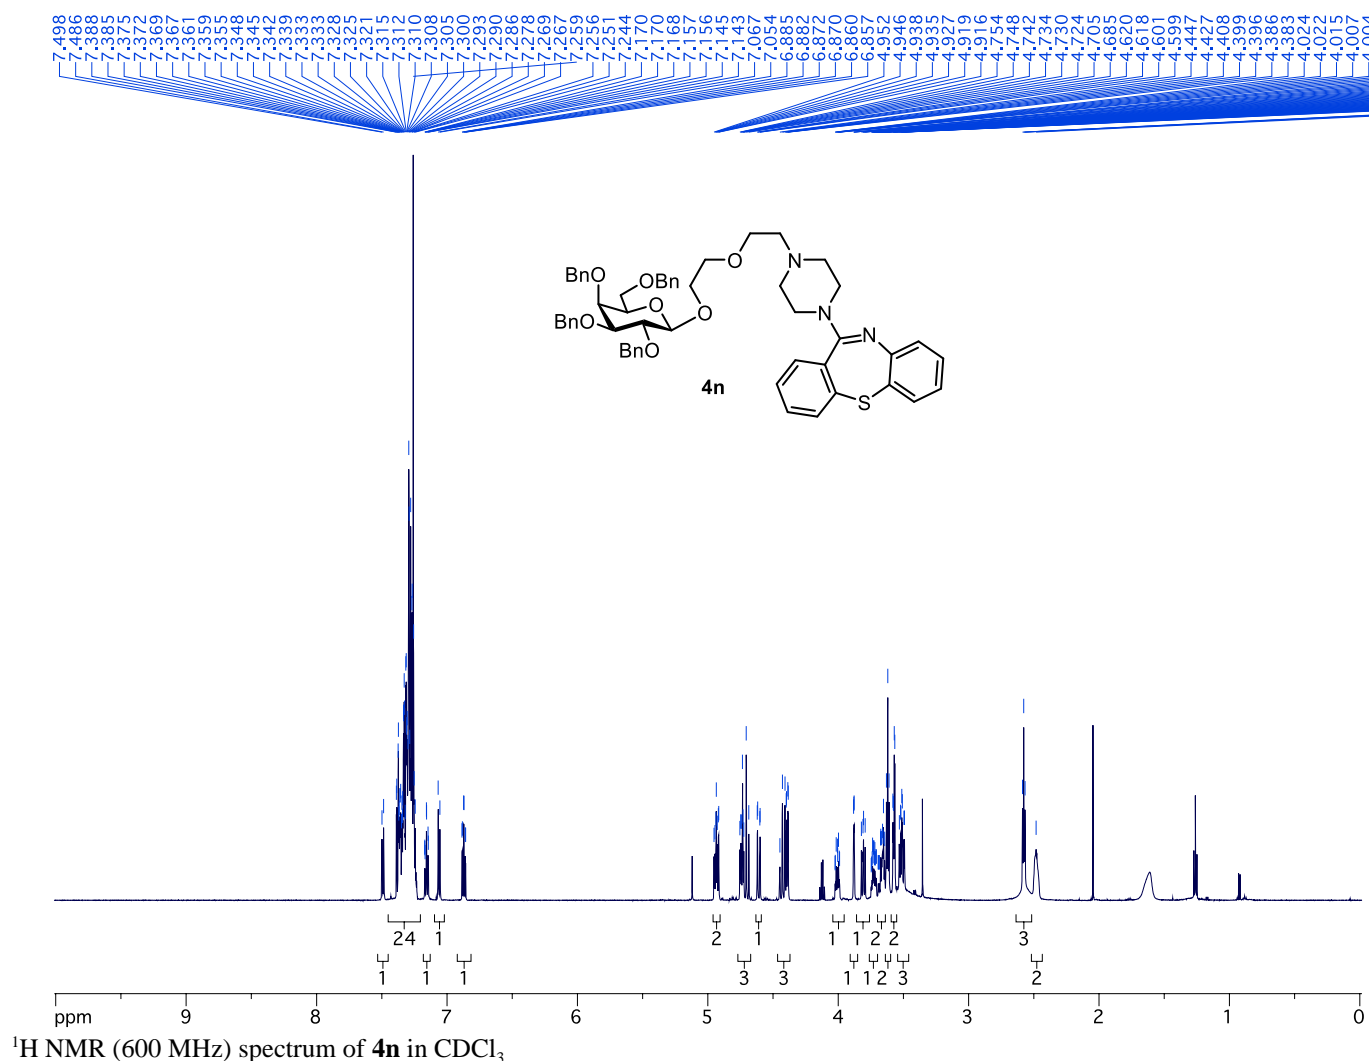

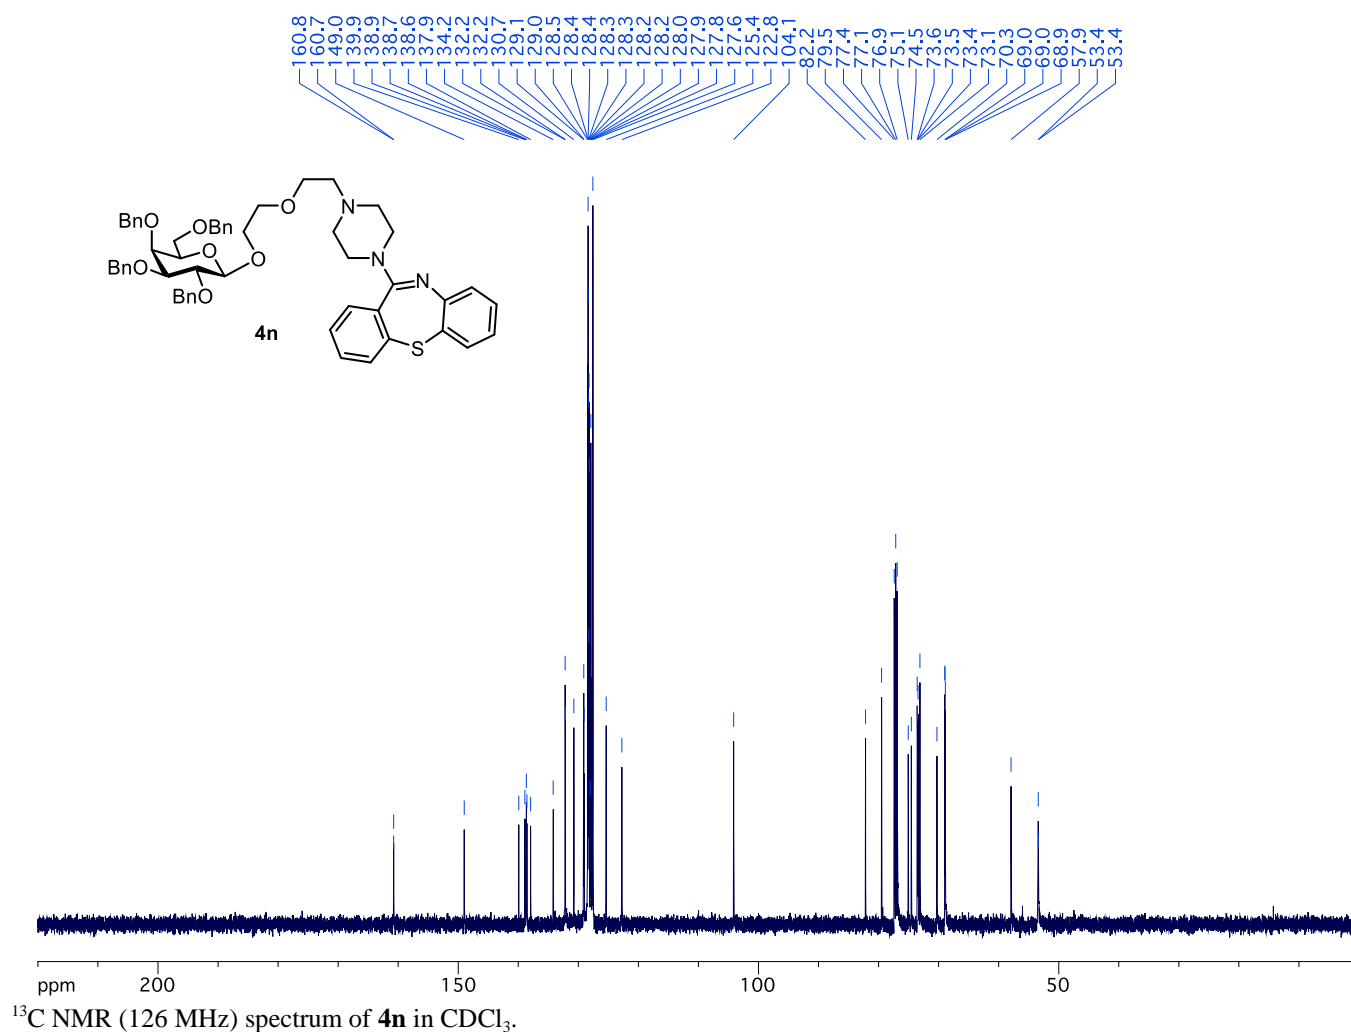

### Preparation of **3o**

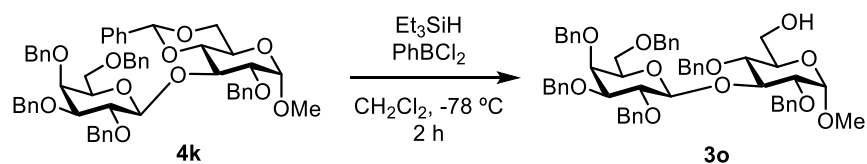

To a flame-dry round bottom flask with a stir bar was charged Gal- $\beta$ (1,3)-Glu (**4k**) (130 mg, 0.145 mmol), fitted with a septum, and flushed with nitrogen 3-times. Next, 8 mL dry dichloromethane was added to the reaction mixture under nitrogen and cooled to  $-78\text{ }^\circ\text{C}$  in a dry ice-acetone bath. When the temperature had equilibrated, triethylsilane (23  $\mu\text{L}$ , 0.29 mmol) and dichlorophenylborane (21  $\mu\text{L}$ , 0.29 mmol) were added sequentially with glass microliter syringes. The mixture was left stirring at  $-78\text{ }^\circ\text{C}$  for 2 hours at which point no remaining starting material was observed by TLC analysis. The mixture was concentrated with a stream of nitrogen air and then chromatographed directly without workup on two 25 g SiO<sub>2</sub> using an ether/hexanes gradient on a Biotage MPLC to afford the product (**3o**) in 39% yield (50 mg, 0.056 mmol) as an oil.

<sup>1</sup>H-NMR (600 MHz, CDCl<sub>3</sub>):  $\delta$  7.40-7.26 (m, 30H), 5.00-4.93 (m, 3H), 4.79 (d,  $J = 11.9$  Hz, 1H), 4.73 (d,  $J = 11.9$  Hz, 1H), 4.71 (d,  $J = 10.5$  Hz, 1H), 4.58 (d,  $J = 11.6$  Hz, 1H), 4.55 (d,  $J = 11.6$  Hz, 1H), 4.49 (d,  $J = 11.6$  Hz, 1H), 4.46 (d,  $J = 11.8$  Hz, 1H), 4.40 (d,  $J = 11.8$  Hz, 1H), 4.33 (d,  $J = 7.7$  Hz, 1H), 4.27 (d,  $J = 4.9$  Hz, 1H), 4.21 (dd,  $J = 9.4, 4.9$  Hz, 1H), 4.09-4.06 (m,



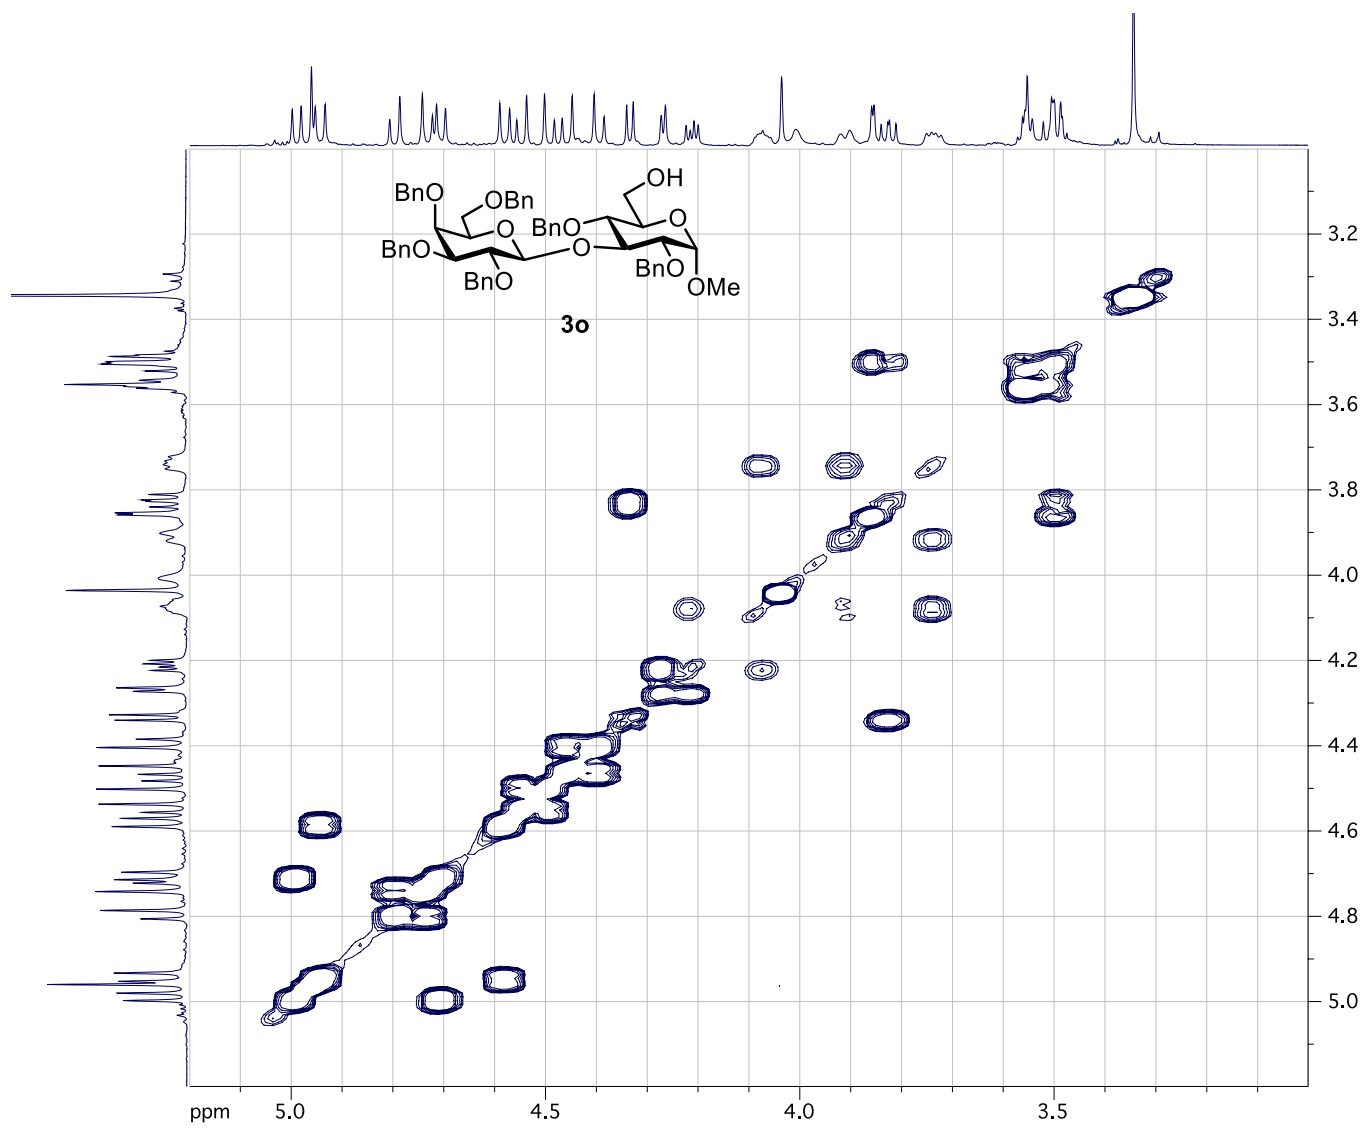

$^1\text{H}$ - $^1\text{H}$  COSY NMR (600 MHz) spectrum of **3o** in  $\text{CDCl}_3$

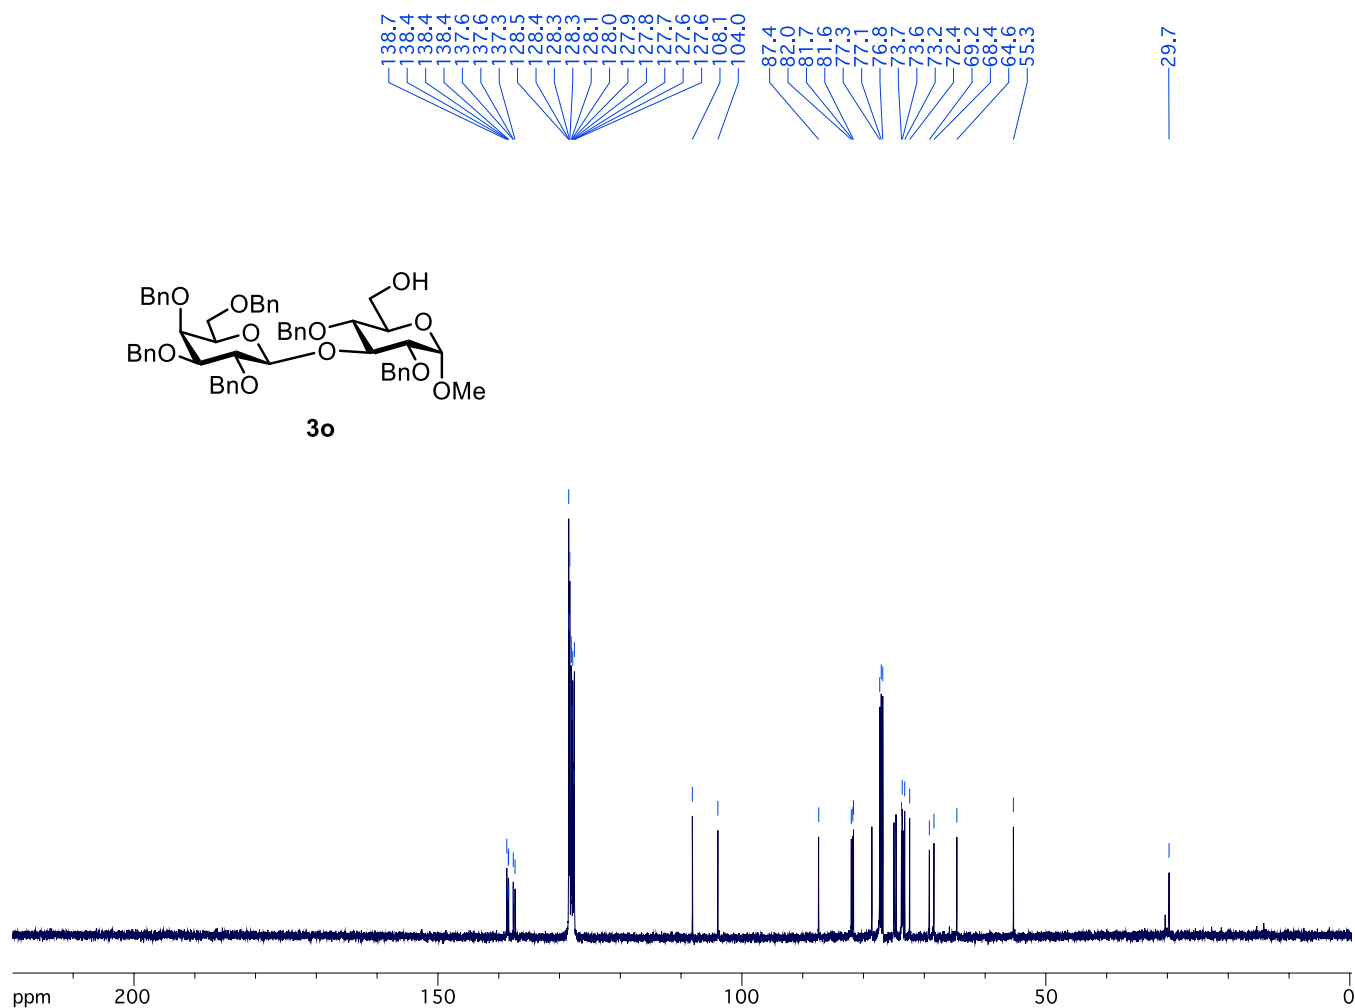

$^{13}\text{C}$  NMR (126 MHz) spectrum of **3o** in  $\text{CDCl}_3$ .

### Preparation of **4o**

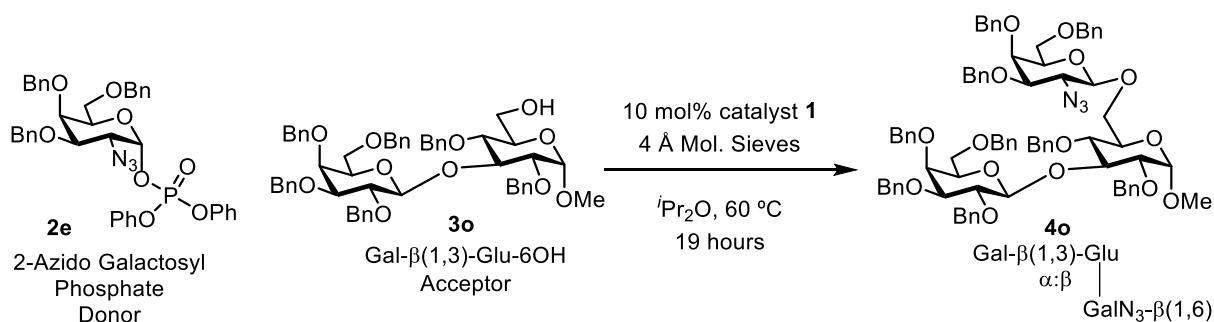

To an oven-dry 0.5-dram vial with a stir bar was charged 40 mg flame-dry 4 Å molecular sieves, 4 mg (4  $\mu\text{mol}$ ) catalyst **1**, and 38 mg (42  $\mu\text{mol}$ ) Gal- $\beta$ (1,3)Glu-6OH acceptor (**3o**), and 390  $\mu\text{L}$  of a 0.1 M solution of 2-azido galactosyl phosphate donor (**2e**) was added open to air and the vial was closed with a PTFE cap. The mixture was then heated with efficient stirring at 60  $^\circ\text{C}$  in an oil bath for 19 hours over which time the mixture thickened. After 19 hours, the mixture is cooled to room temperature and the entire mixture is diluted with diethyl ether and filtered to remove the molecular sieves. This solution is concentrated and  $^1\text{H}$  NMR analysis on the crude mixture is used to determine the anomeric selectivity ( $\beta$ -only). The mixture was then

chromatographed directly with 50 g SiO<sub>2</sub> using an ether/hexanes gradient on a Biotage MPLC to afford the product (**4o**) in 70% yield (37 mg, 27 μmol) as a single anomer. Fractions before and after the eluted product were also collected, concentrated, and analyzed by NMR and no trace of the α-anomer was observed.

**<sup>1</sup>H-NMR** (600 MHz, CDCl<sub>3</sub>): δ 7.39-7.23 (m, 45H), 4.97 (d, *J* = 10.5 Hz, 1H), 4.92-4.88 (m, 3H), 4.75 (d, *J* = 11.9 Hz, 1H), 4.70-4.64 (m, 4H), 4.56 (dd, *J* = 11.6, 1.1 Hz, 2H), 4.53 (d, *J* = 11.7 Hz, 1H), 4.47 (d, *J* = 11.6 Hz, 1H), 4.44-4.33 (m, 5H), 4.27 (dt, *J* = 13.8, 6.7 Hz, 3H), 4.21-4.17 (m, 2H), 4.01 (s, 1H), 3.91 (dd, *J* = 10.3, 8.1 Hz, 1H), 3.86 (dd, *J* = 13.0, 2.6 Hz, 2H), 3.79 (dd, *J* = 9.8, 7.8 Hz, 1H), 3.71 (dd, *J* = 10.5, 5.7 Hz, 2H), 3.63 (d, *J* = 16.8 Hz, 1H), 3.57 (dd, *J* = 9.2, 5.4 Hz, 1H), 3.53-3.49 (m, 4H), 3.45 (dd, *J* = 9.8, 2.9 Hz, 1H), 3.32 (dd, *J* = 10.5, 2.9 Hz, 1H), 3.29 (s, 3H).

**<sup>13</sup>C-NMR** (126 MHz, CDCl<sub>3</sub>): δ 138.91, 138.68, 138.60, 138.57, 137.98, 137.87, 137.83, 137.54, 128.57, 128.55, 128.48, 128.37, 128.35, 128.30, 128.20, 128.15, 128.09, 128.02, 127.97, 127.95, 127.90, 127.84, 127.70, 127.62, 108.28, 103.72, 103.13, 87.49, 81.94, 81.43, 81.06, 81.01, 78.79, 77.41, 77.37, 77.16, 76.91, 75.09, 74.69, 74.67, 73.77, 73.65, 73.53, 73.20, 72.60, 72.40, 72.38, 71.68, 69.06, 68.59, 68.35, 63.22, 55.35, 29.83.

**HRMS-ESI (m/z)**: calculated for C<sub>82</sub>H<sub>87</sub>N<sub>3</sub>O<sub>15</sub> [M+H]<sup>+</sup>: 1354.621, found: 1354.6173.



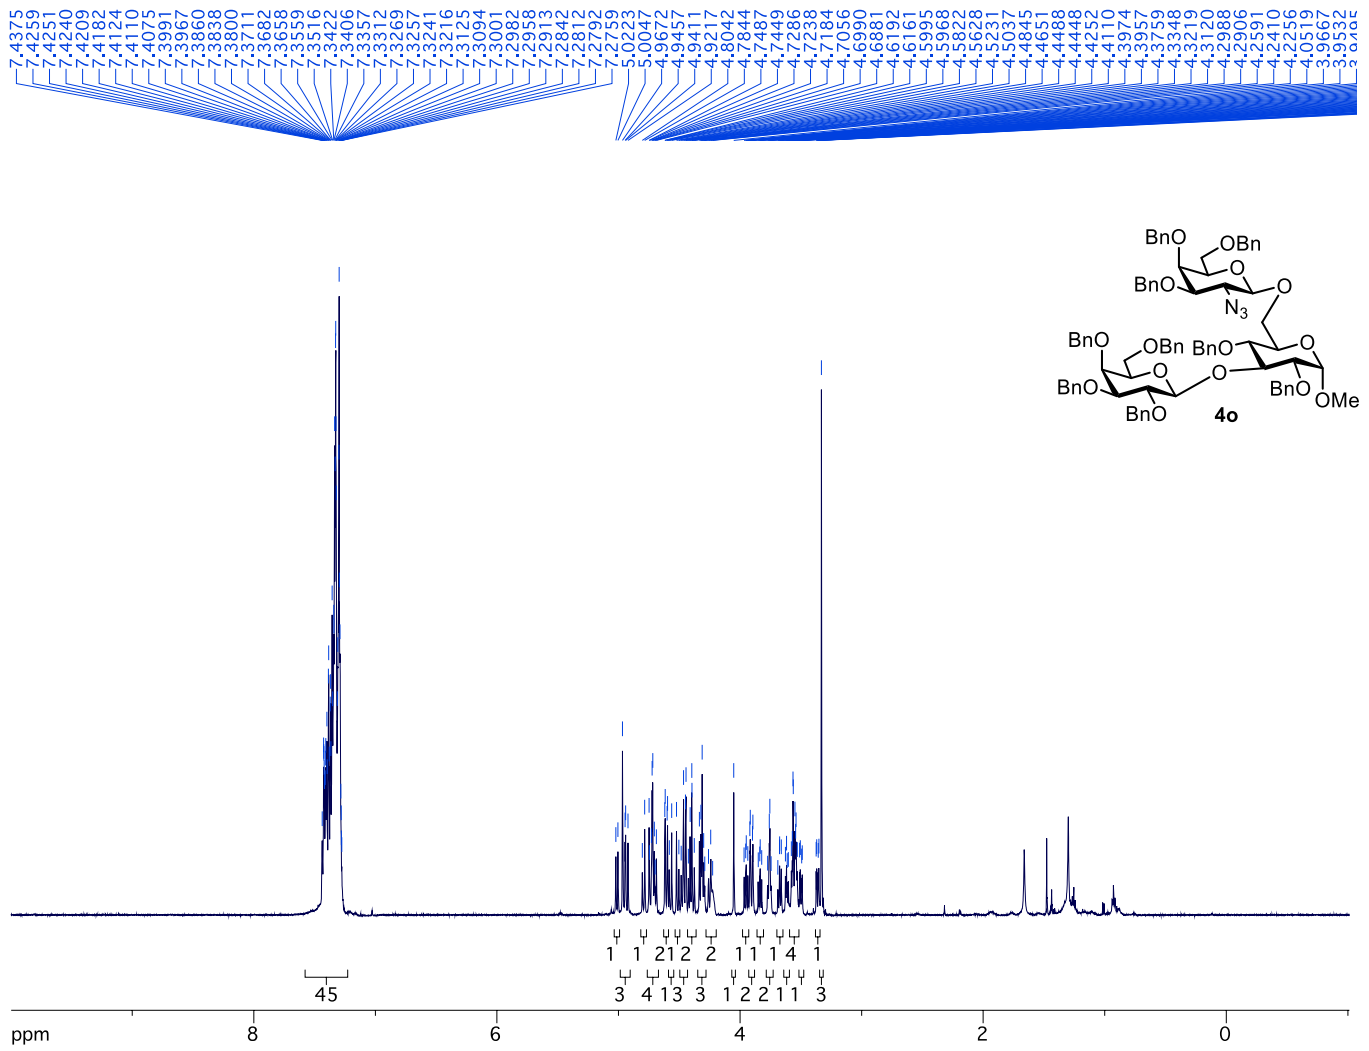

<sup>1</sup>H NMR (600 MHz) spectrum of **4o** in CDCl<sub>3</sub>

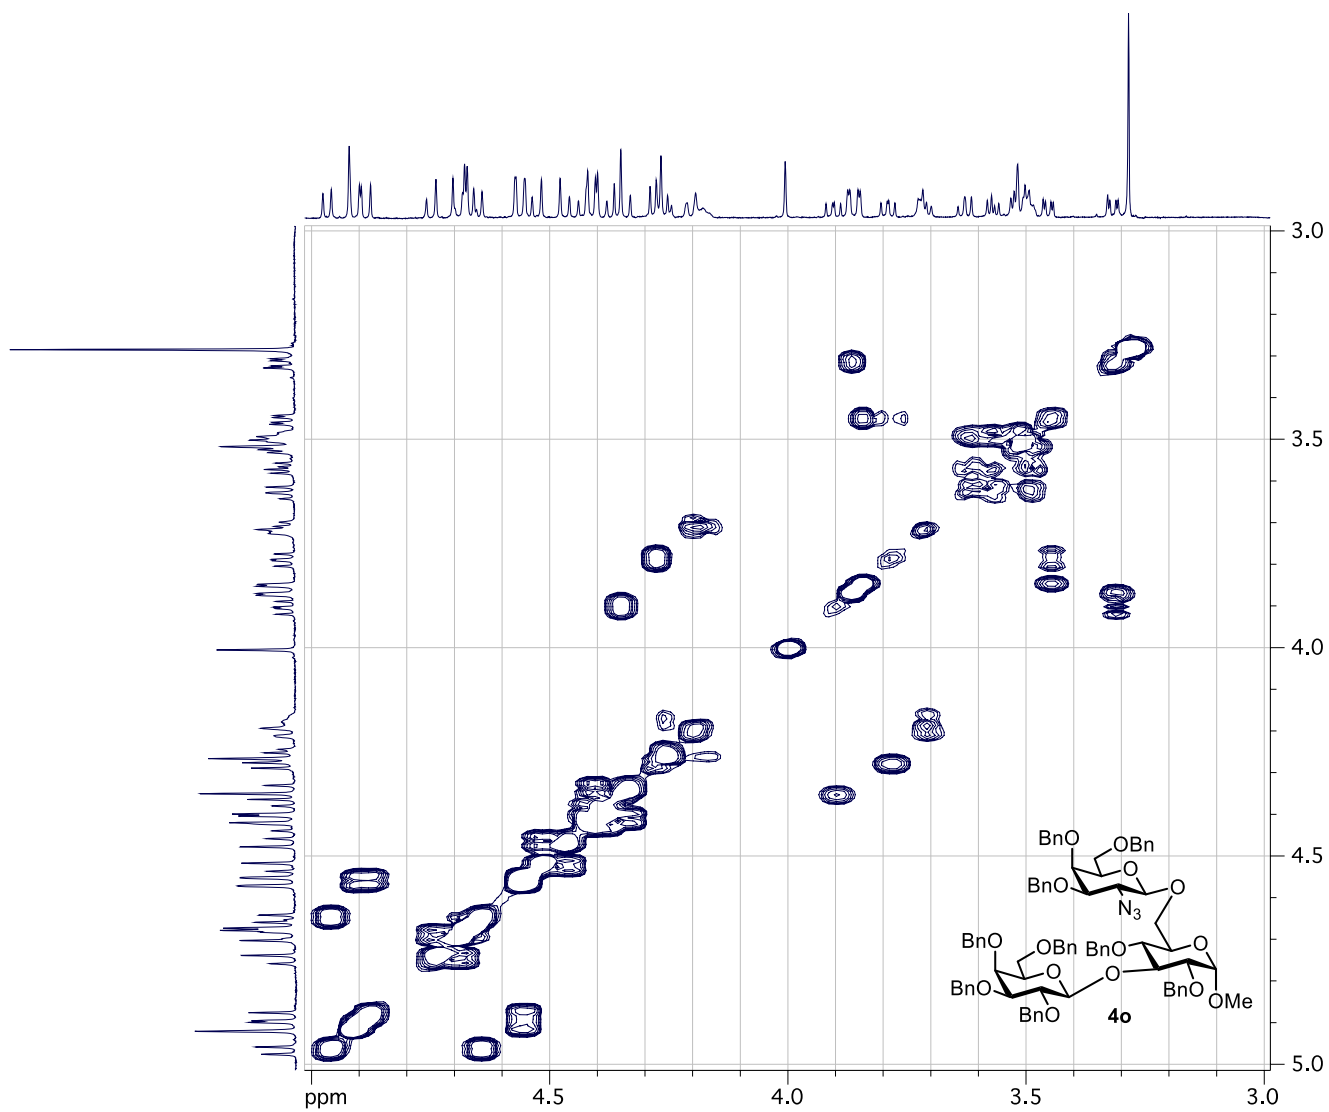

$^1\text{H}$ - $^1\text{H}$  COSY NMR (600 MHz) spectrum of **4o** in  $\text{CDCl}_3$

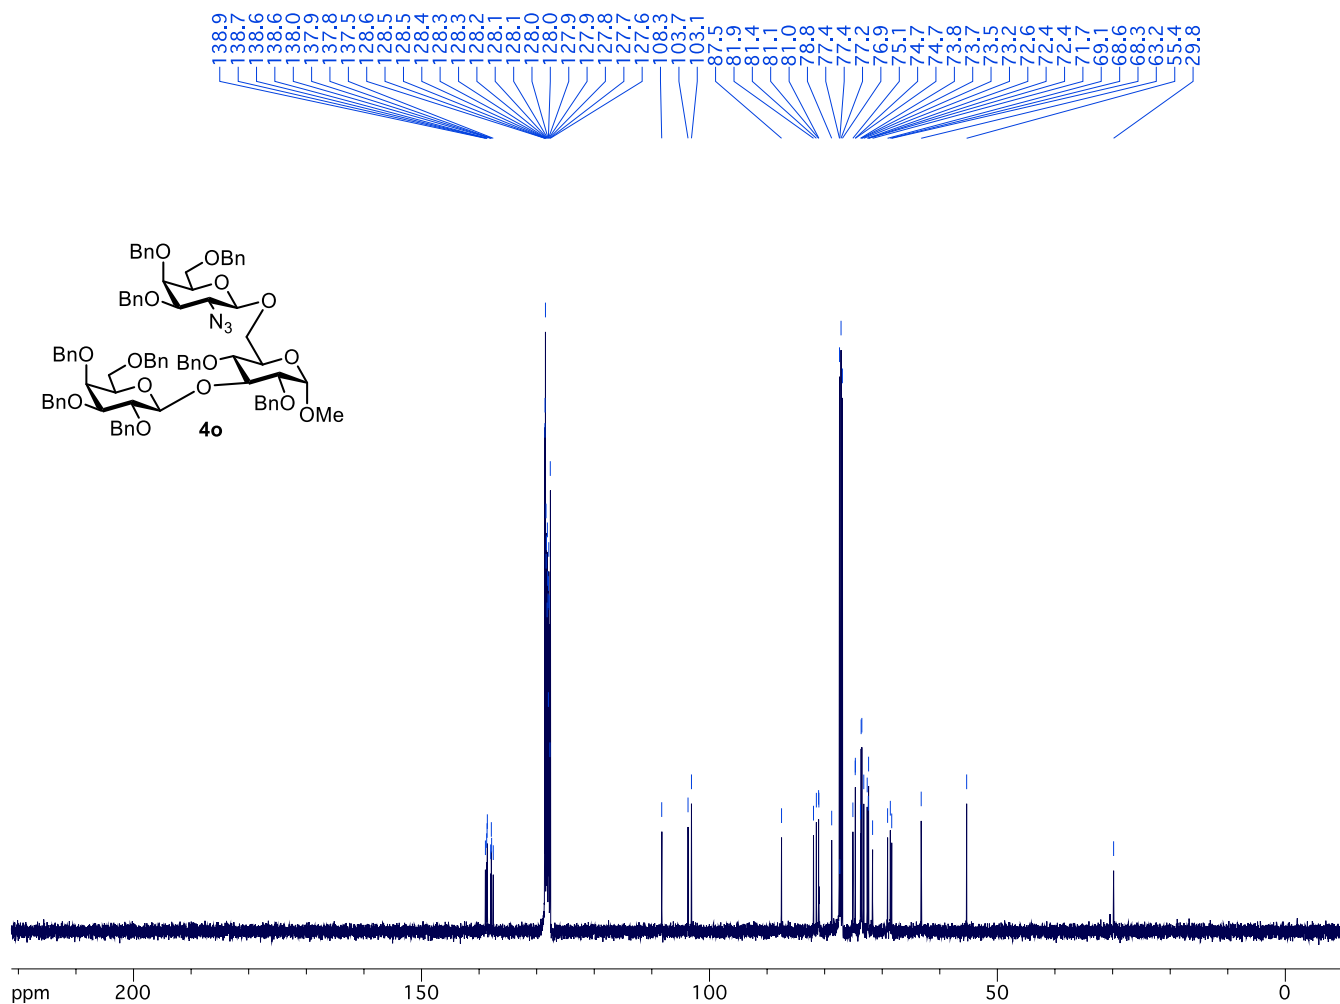

$^{13}\text{C}$  NMR (126 MHz) spectrum of **4o** in  $\text{CDCl}_3$ .

### Preparation of **2f**

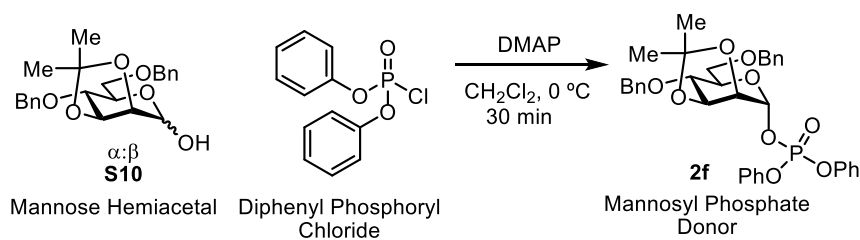

To a flame-dry 25 mL round bottom flask with a stir bar was charged 0.22 g (1.8 mmol, 3.0 equiv.) DMAP. The flask was evacuated and backfilled with nitrogen three times. To the flask was added a solution of 0.240 g (0.6 mmol, 1.0 equiv.) 2,3-Isopropylidene-4,6-O-benzyl mannose hemiacetal (**S10**) in 10 mL dry dichloromethane. The reaction was cooled to 0 °C, and 0.15 mL (0.72 mmol, 1.2 equiv.) diphenyl phosphoryl chloride was added dropwise. The reaction was stirred at 0 °C for 30 minutes. The reaction was concentrated and purified on 25 g  $\text{SiO}_2$  using an ether/hexanes gradient on a Biotage MPLC to yield the product (**2f**) in 58% yield (0.220 g, 0.35 mmol).

Note: the mannosyl donor (**2f**) is best stored as a solution in ethereal solvents. Higher yields of activation are possible by using C2-functionalized reverse phase silica gel with the same mobile phase.

<sup>1</sup>H-NMR (600 MHz, CDCl<sub>3</sub>): δ 7.33-7.15 (m, 20H), 6.18 (d, *J* = 6.5 Hz, 1H), 4.84 (d, *J* = 11.3 Hz, 1H), 4.57 (dd, *J* = 20.6, 11.8 Hz, 2H), 4.47 (d, *J* = 12.2 Hz, 1H), 4.33 (t, *J* = 6.4 Hz, 1H), 4.13 (d, *J* = 5.7 Hz, 1H), 3.86-3.84 (m, 1H), 3.73 (dd, *J* = 10.2, 7.1 Hz, 1H), 3.68 (dd, *J* = 11.1, 3.7 Hz, 1H), 3.50-3.45 (m, 2H), 1.50 (s, 3H), 1.34 (s, 3H).

<sup>13</sup>C-NMR (126 MHz, CDCl<sub>3</sub>): δ 150.41, 150.36, 150.31, 138.12, 138.01, 129.57, 128.61, 128.45, 128.43, 128.38, 128.15, 128.04, 127.80, 127.69, 127.54, 125.55, 125.47, 120.22, 120.18, 120.14, 120.07, 120.05, 110.08, 97.40, 97.35, 78.13, 77.23, 77.19, 76.90, 75.45, 75.36, 74.53, 73.47, 73.20, 71.00, 67.99, 27.86, 26.37.

<sup>31</sup>P-NMR (162 MHz, CDCl<sub>3</sub>): δ -14.25.

HRMS-ESI (*m/z*): calculated for C<sub>35</sub>H<sub>37</sub>O<sub>9</sub>P [M+H]<sup>+</sup>: 633.2248, found: 633.2239.

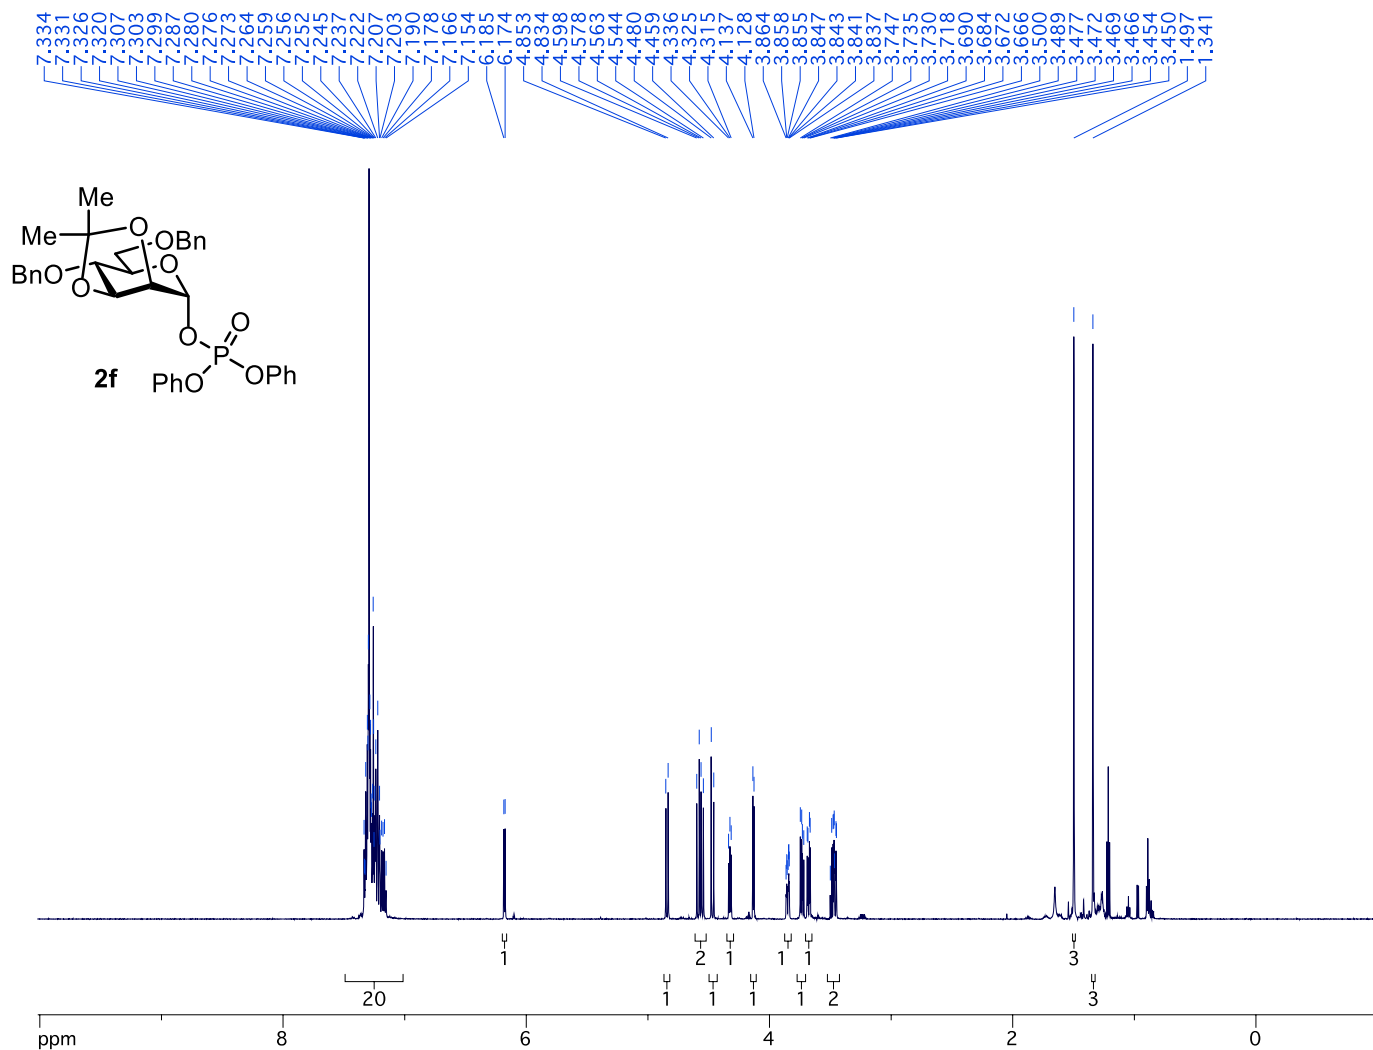

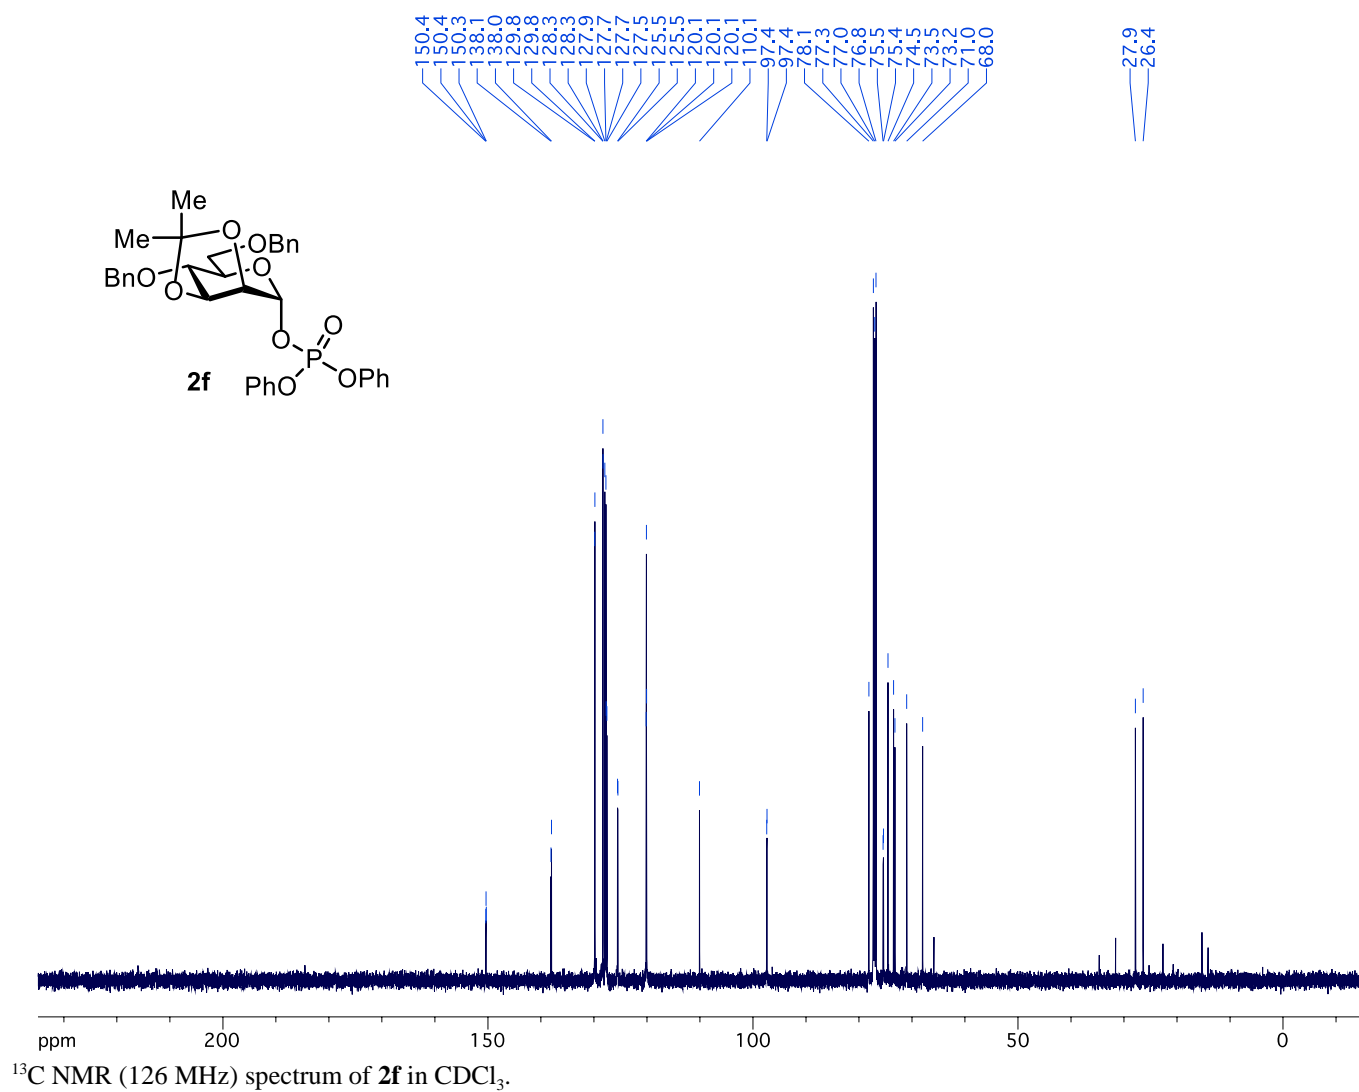

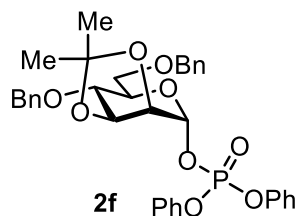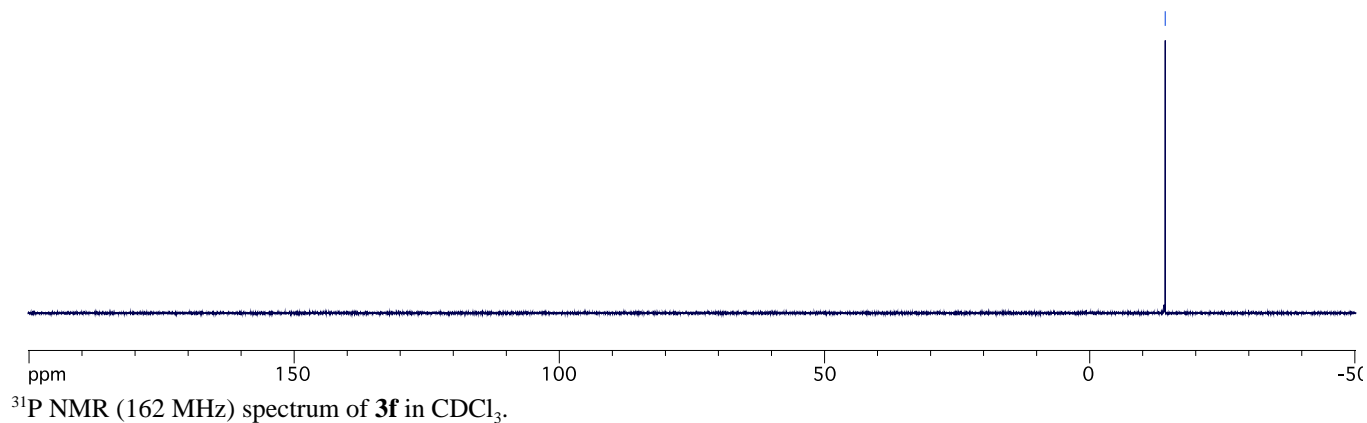

### Preparation of **4p**

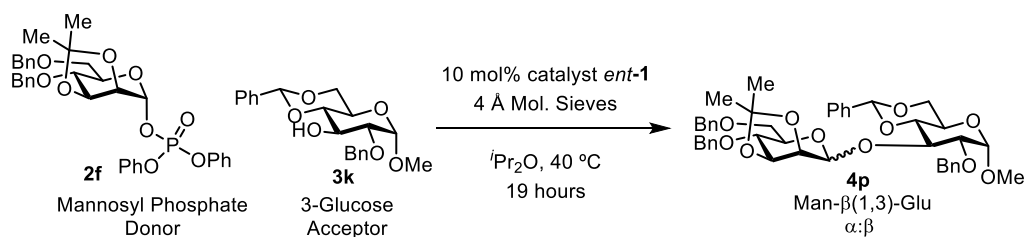

To a flame-dry 5 mL round bottom flask with a stir bar was charged 250 mg flame-dry 4 Å molecular sieves, 28 mg (0.050 mmol) catalyst *ent-1*, 186 mg (0.500 mmol) 3-glucose acceptor (**3k**), and the mannosyl phosphate donor (**2f**) (153 mg, 0.24 mmol) open to air. Next, 2.5 mL diisopropyl ether was added and the flask was closed with a plastic cap using parafilm to seal the cap tightly. The mixture was then heated with efficient stirring at 40 °C in an oil bath for 19 hours over which time the mixture thickened. After 19 hours, the mixture is cooled to room temperature and 100 μL aliquot is diluted with diethyl ether and filtered to remove the molecular sieves. This solution is concentrated and <sup>1</sup>H NMR analysis on the crude mixture is used to determine the anomeric selectivity (92:8 β:α). The mixture was then chromatographed directly with 50 g SiO<sub>2</sub> using an ether/hexanes gradient on a Biotage MPLC to yield the product (**4p**) in 48% yield (87 mg, 0.115 mmol) as a mixture of anomers.



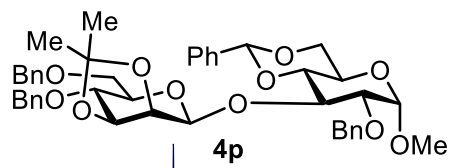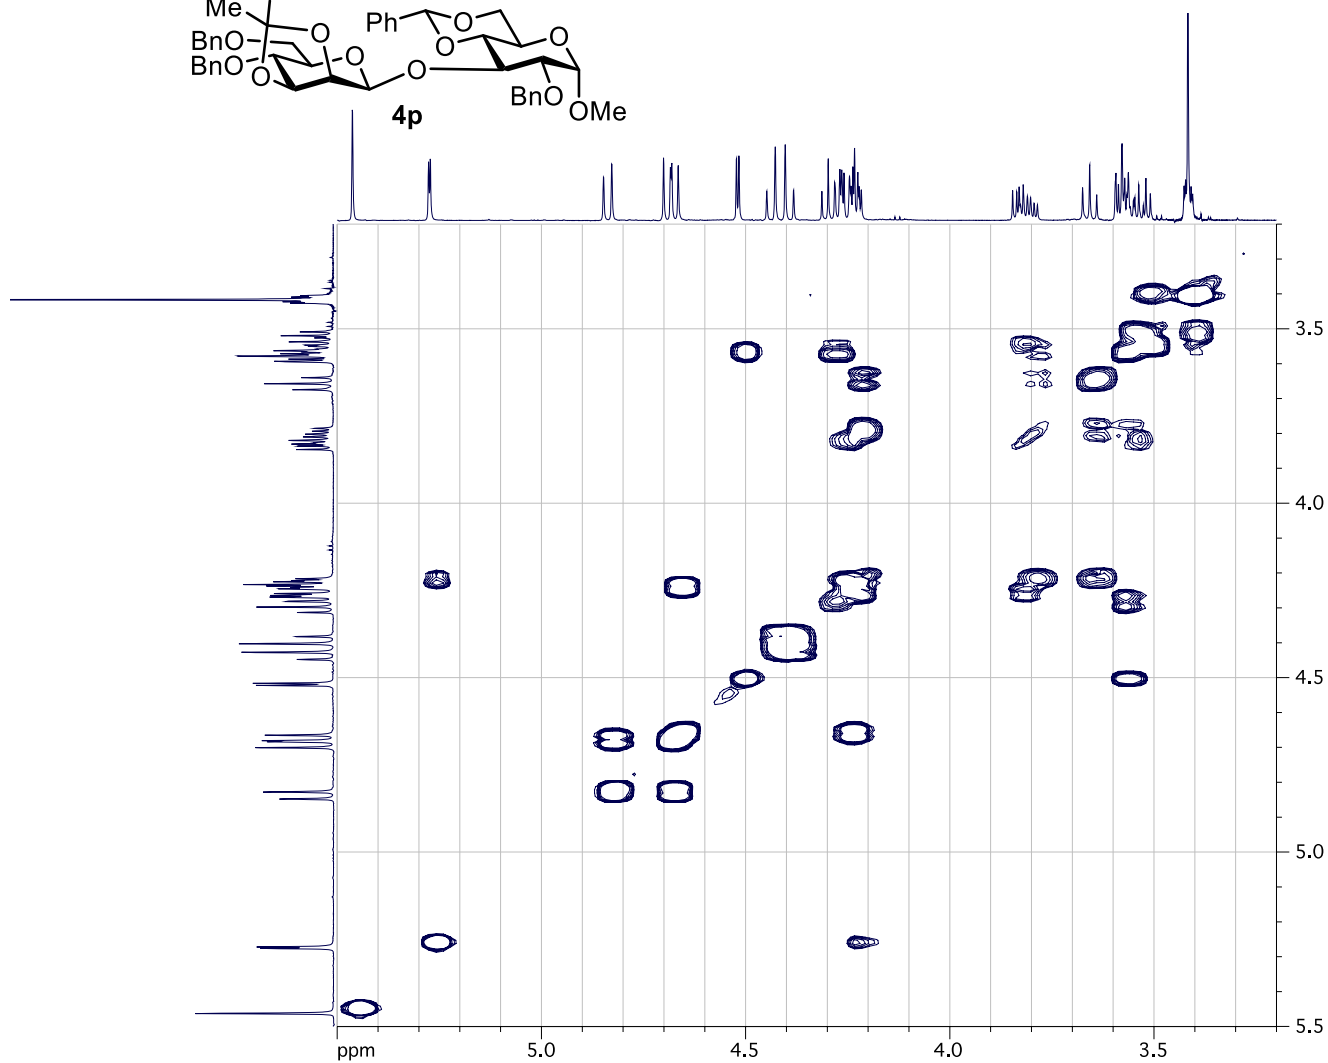

$^1\text{H}$ - $^1\text{H}$  COSY NMR (600 MHz) spectrum of **4p** in  $\text{CDCl}_3$



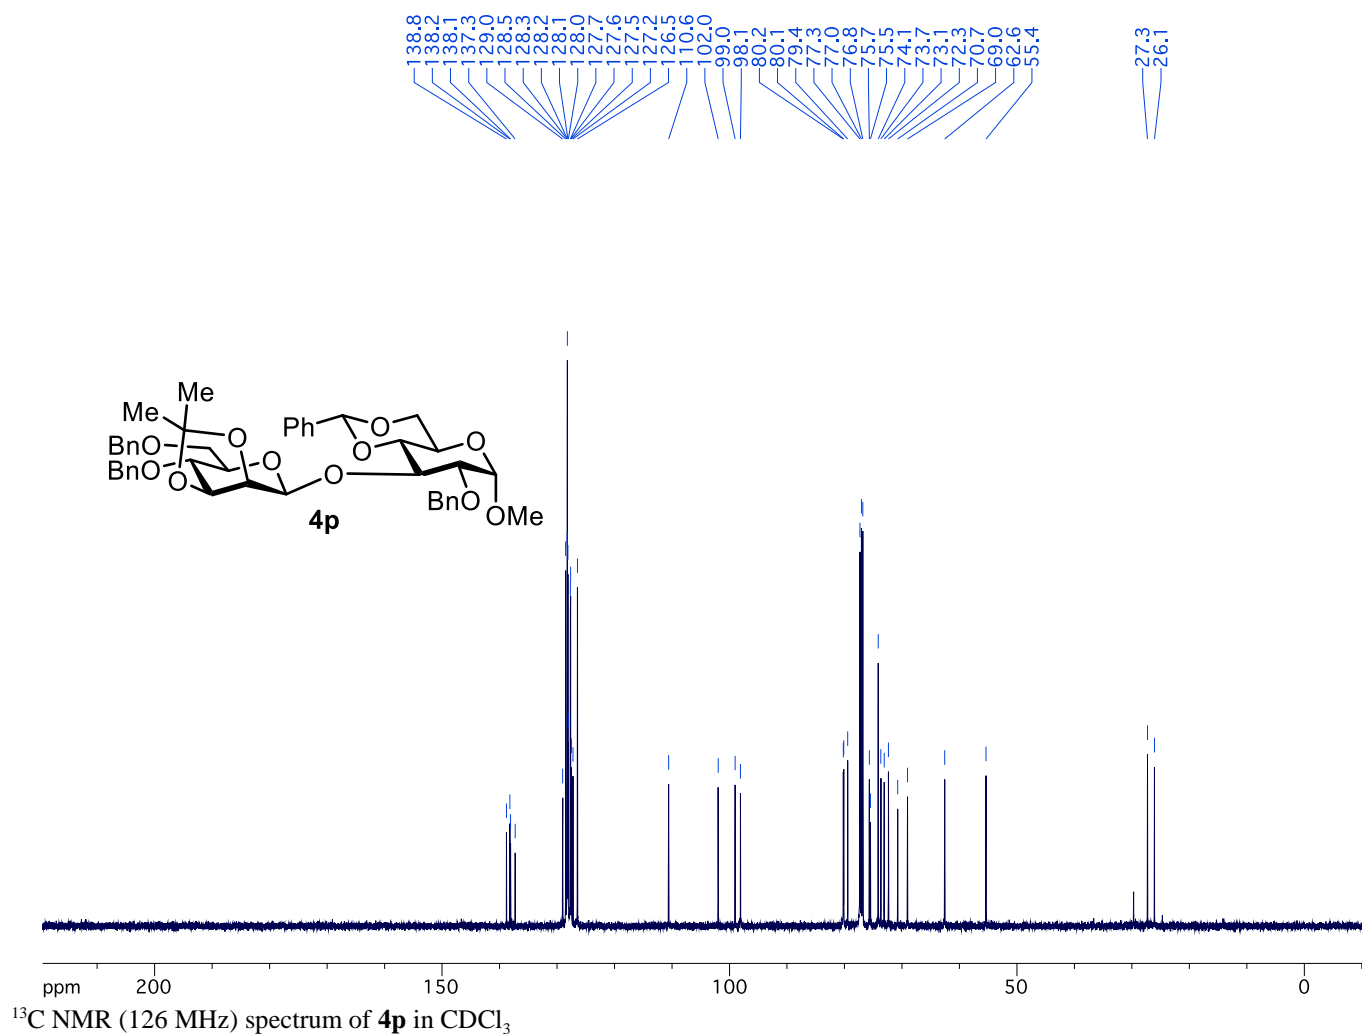

## Preparation of **2g**

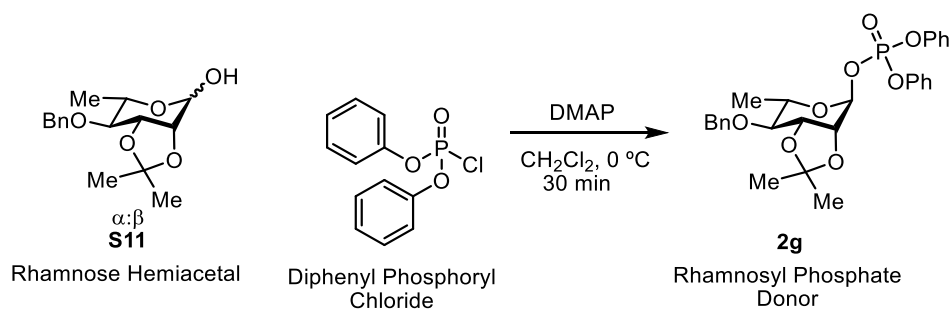

To a flame-dry 25 mL round bottom flask with a stir bar was charged 0.456 g DMAP (3.73 mmol, 3.0 equiv.). The flask was evacuated and backfilled with nitrogen three times. To the flask was added a solution of 0.366 g (1.24 mmol) 2,3-Isopropylidene-4-O-benzyl rhamnose hemiacetal (**S11**) in 12 mL dry dichloromethane. The reaction was cooled to 0 °C, and 0.27 mL diphenyl phosphoryl chloride (1.31 mmol, 1.2 equiv.) was added dropwise. The reaction was stirred at 0 °C for 30 minutes. The reaction was concentrated and purified on 10 g silanized SiO<sub>2</sub> using an ether/hexanes gradient on a Biotage MPLC to yield product (**2g**) in 49% yield (0.32 g, 0.61 mmol).



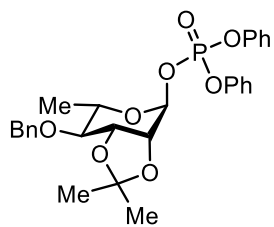

**2g**

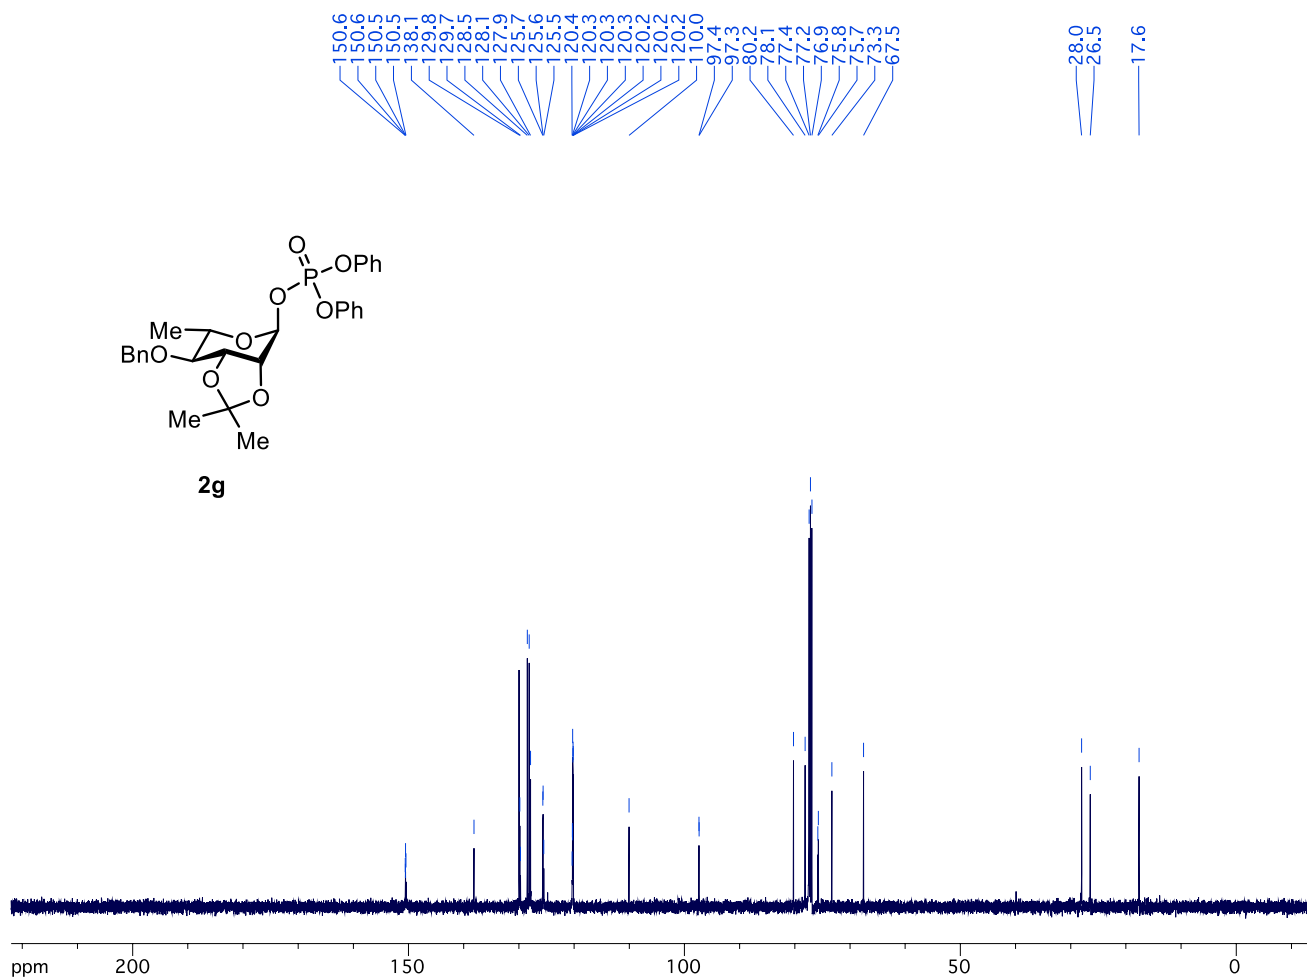

<sup>13</sup>C NMR (126 MHz) spectrum of **2g** in CDCl<sub>3</sub>.

14.1

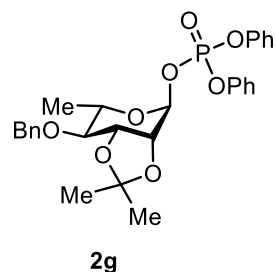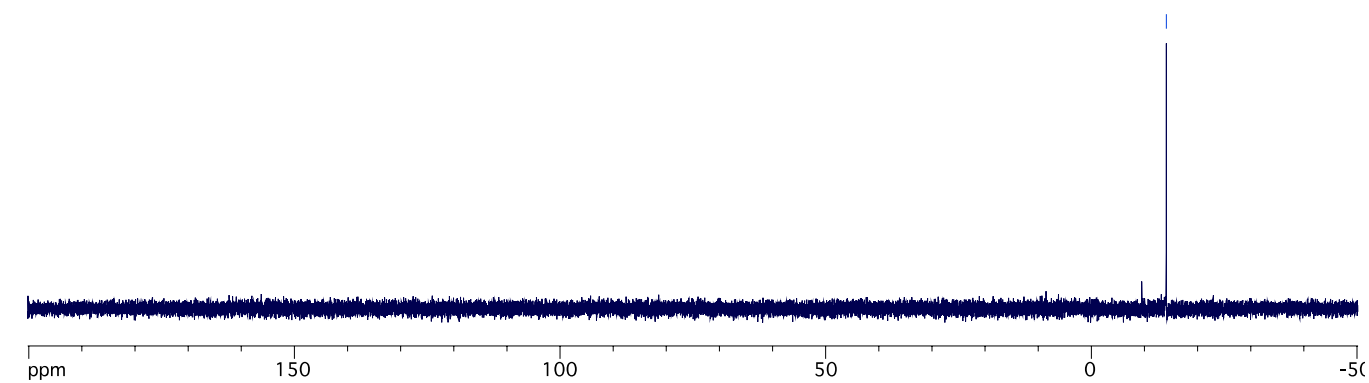

$^{31}\text{P}$  NMR (162 MHz) spectrum of **2g** in  $\text{CDCl}_3$ .

### Preparation of **4q**

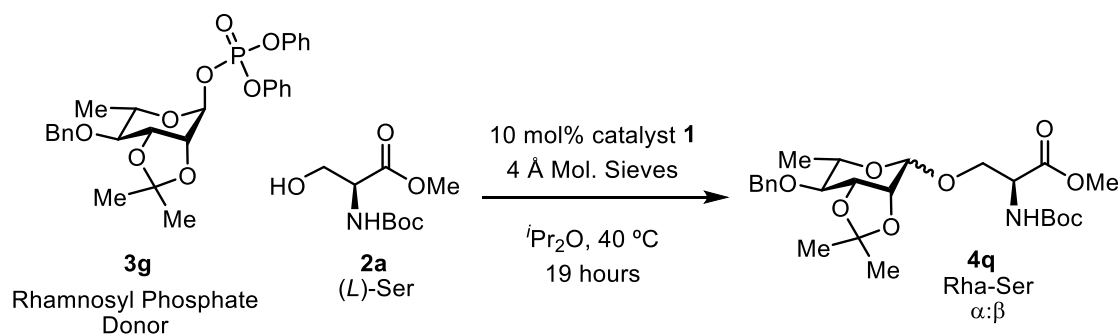

To a flame-dry 1-dram vial with a stir bar was charged 150 mg flame-dry 4 Å molecular sieves, 17 mg (0.015 mmol) catalyst **1**, and 67 mg (0.30 mmol) (*L*)-Boc-Ser-OMe (**3a**), and 1.5 mL of a 0.1 M solution of 2,3-Isopropylidene-4-O-benzyl rhamnose phosphate donor (**2g**) in diisopropyl ether. Open to air, the flask was closed with a plastic cap and parafilm was used to seal the cap tightly. The mixture was then heated with efficient stirring at 40 °C in an oil bath for 19 hours over which time the mixture thickened. After 19 hours, the mixture is cooled to room temperature and 100  $\mu\text{L}$  aliquot is diluted with diethyl ether and filtered to remove the molecular sieves. This solution is concentrated and  $^1\text{H}$  NMR analysis on the crude mixture is used to determine

the anomeric selectivity (97:3  $\beta$ : $\alpha$ ). The mixture was then chromatographed directly with 25 g SiO<sub>2</sub> using an ether/hexanes gradient on a Biotage MPLC to yield the product (**4q**) in 91% yield (68 mg, 0.137 mmol) as a mixture of anomers.

<sup>1</sup>H-NMR (500 MHz, CDCl<sub>3</sub>):  $\delta$  7.36-7.27 (m, 5H), 5.60 (d,  $J$  = 8.7 Hz, 1H), 4.86 (d,  $J$  = 11.5 Hz, 1H), 4.68 (d,  $J$  = 2.3 Hz, 1H), 4.61 (d,  $J$  = 11.5 Hz, 1H), 4.46 (dt,  $J$  = 8.5, 3.2 Hz, 1H), 4.25-4.22 (m, 1H), 4.19 (dd,  $J$  = 6.3, 2.4 Hz, 1H), 4.06 (d,  $J$  = 3.3 Hz, 2H), 3.74 (s, 3H), 3.46-3.41 (m, 2H), 1.51 (s, 3H), 1.44 (s, 9H), 1.37 (s, 3H), 1.33 (d,  $J$  = 5.7 Hz, 3H).

<sup>13</sup>C-NMR (126 MHz, CDCl<sub>3</sub>):  $\delta$  171.03, 155.47, 138.17, 128.39, 128.04, 127.79, 110.76, 98.82, 80.62, 79.96, 79.61, 74.24, 72.83, 70.83, 70.05, 53.92, 52.51, 28.41, 28.35, 27.41, 26.14, 18.90.

$J$ (C-H) of the anomeric carbon was measured to be 158.9 Hz, consistent with a  $\beta$ -Rhamnoside.<sup>25-26</sup>

HRMS-ESI ( $m/z$ ): calculated for C<sub>25</sub>H<sub>37</sub>NO<sub>9</sub> [M+H]<sup>+</sup>: 496.2541, found: 527.2537.

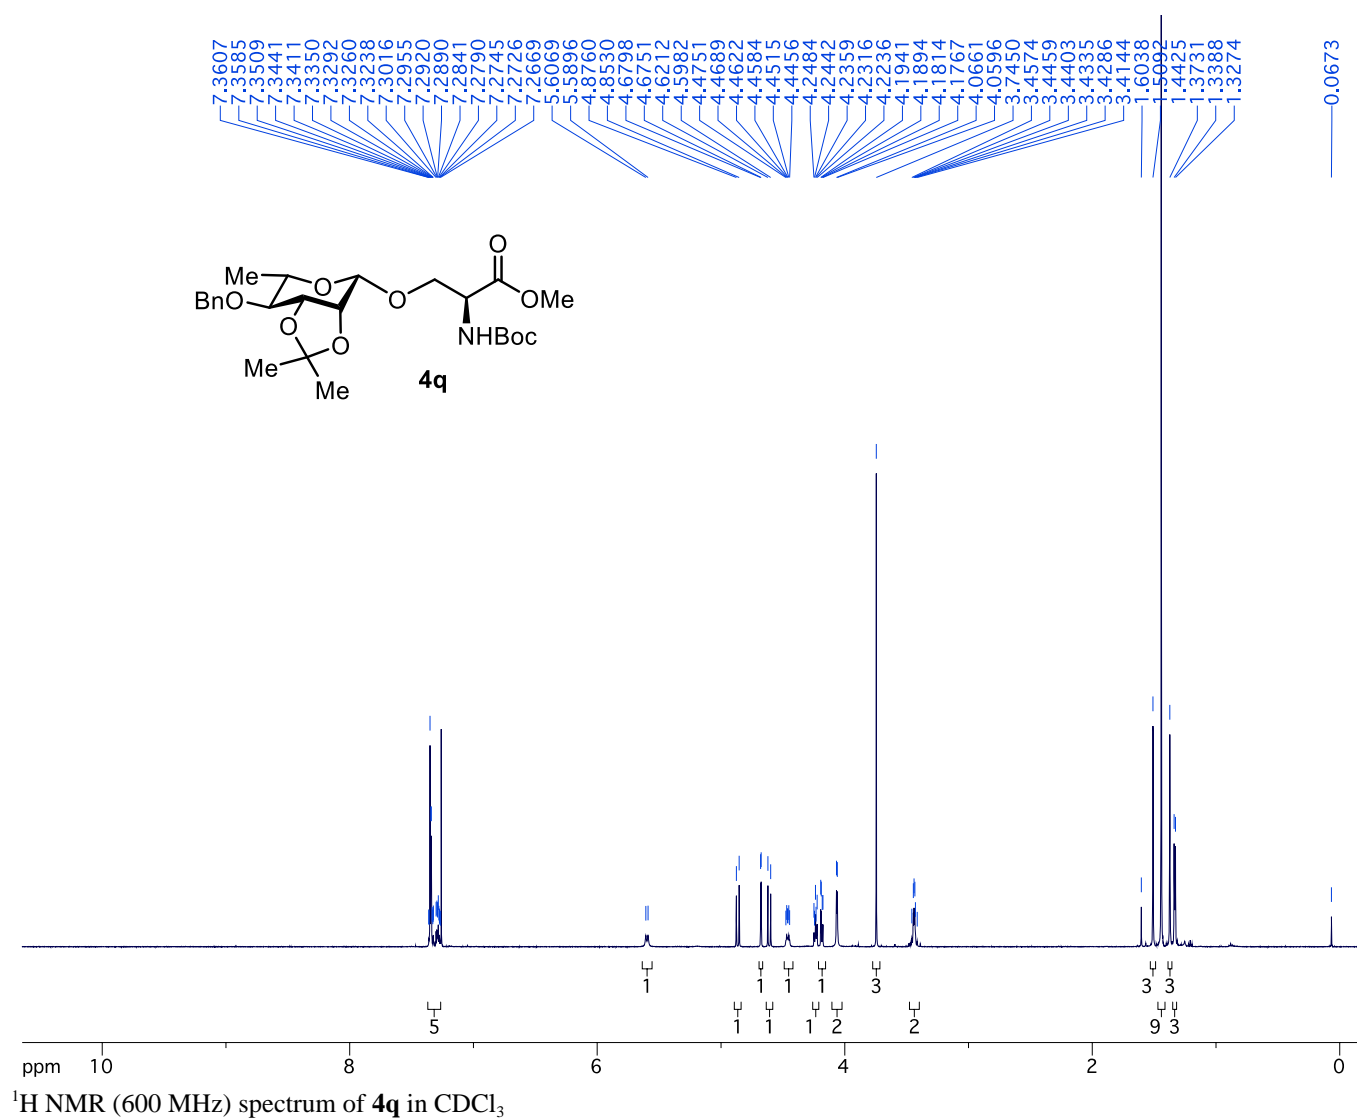

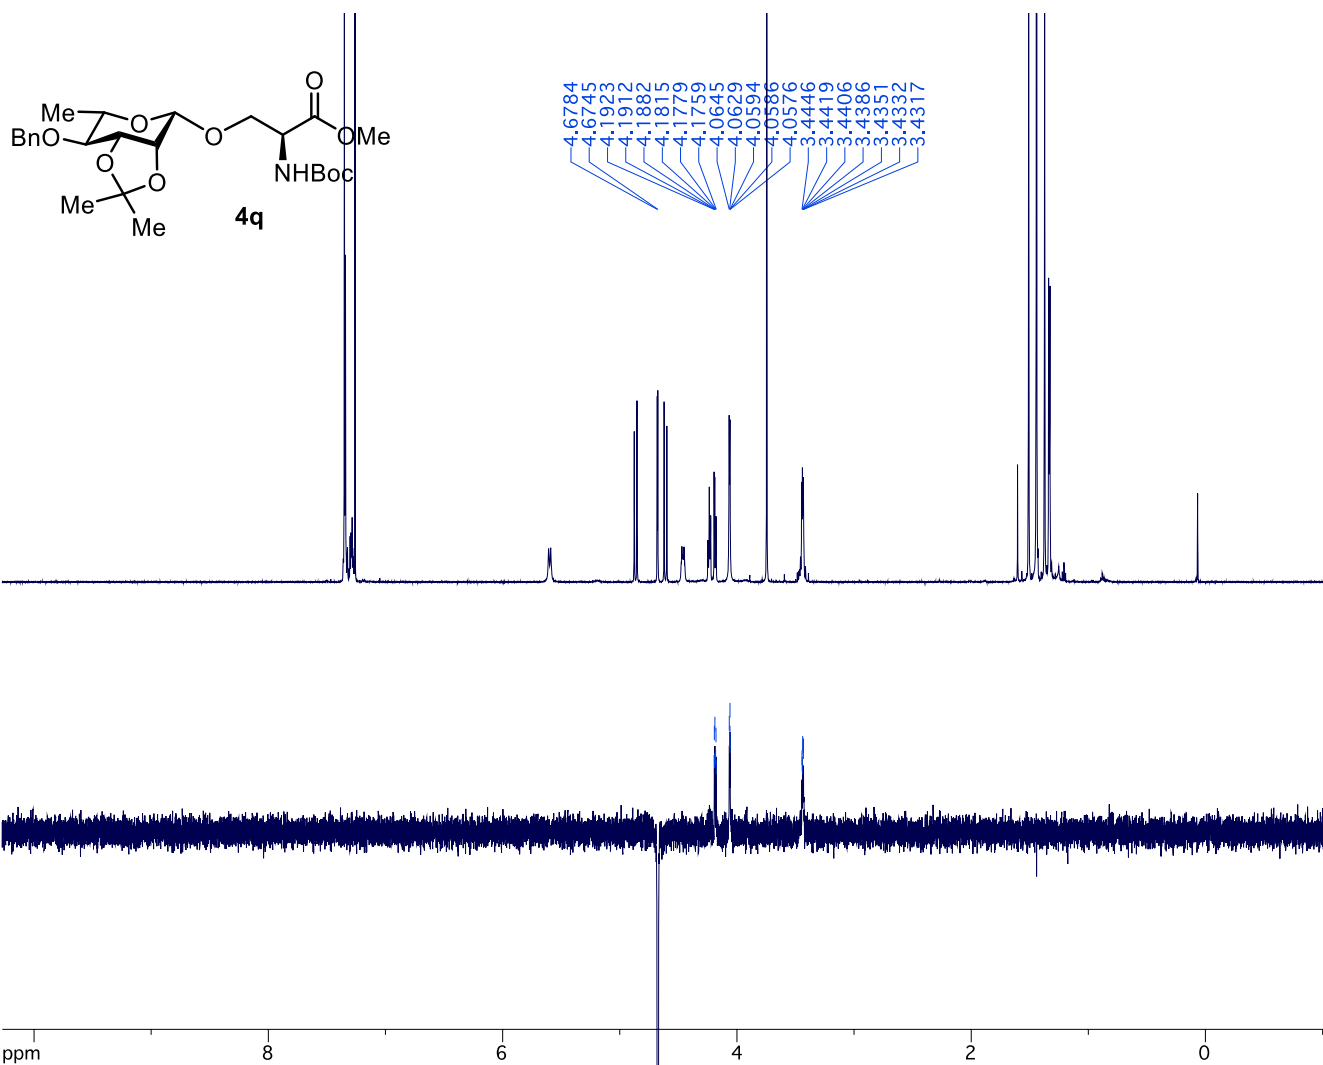

1D NOE irradiating at 4.68 ppm (C1-H) with  $^1\text{H}$  NMR (600 MHz) spectrum of **4q** in  $\text{CDCl}_3$

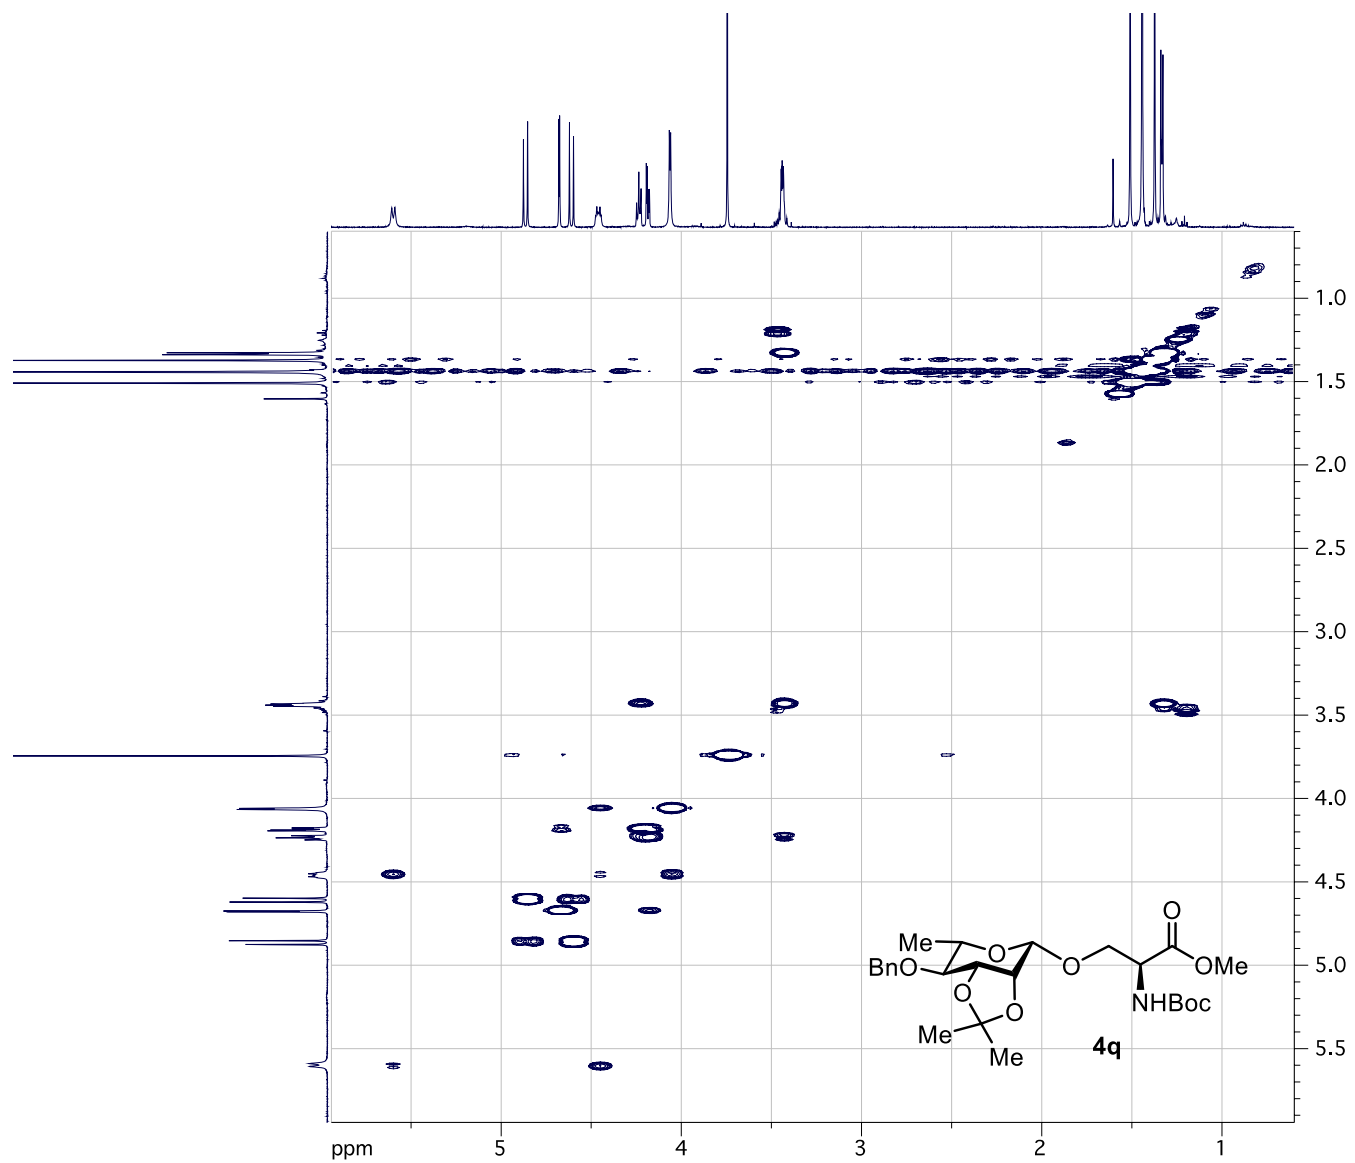

$^1\text{H}$ - $^1\text{H}$  COSY NMR (600 MHz) spectrum of **4q** in  $\text{CDCl}_3$

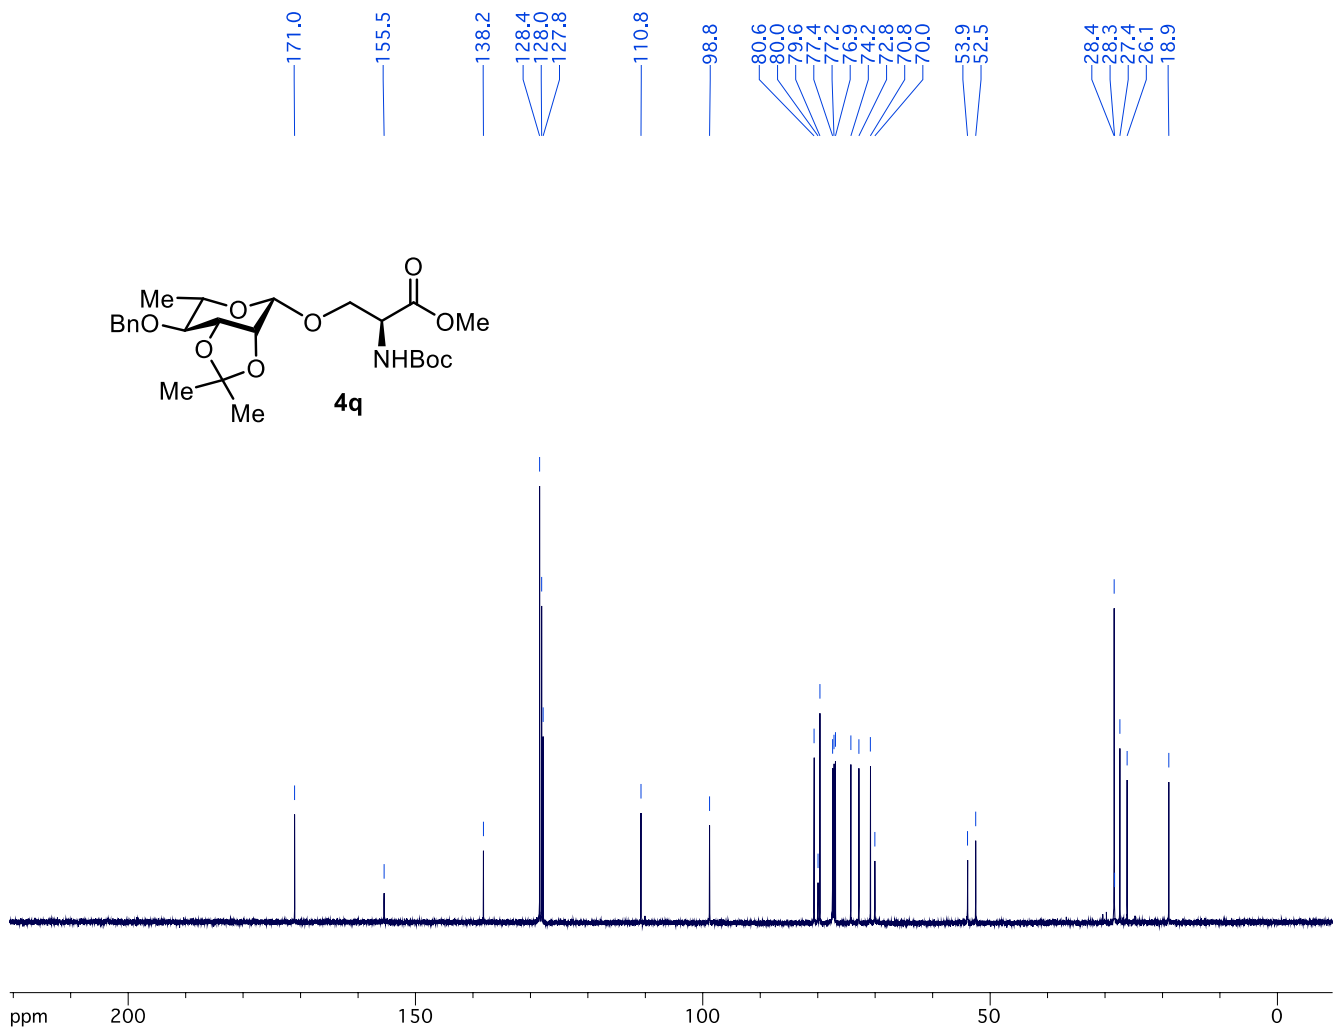

<sup>13</sup>C NMR (126 MHz) spectrum of **4q** in CDCl<sub>3</sub>



## 2.2 Synthetic Procedures and Characterization Data for Previously Reported Compounds

### Preparation of 4j

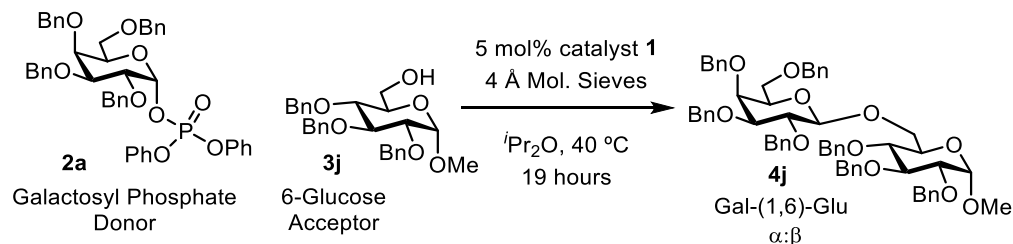

To a flame-dry 5 mL round bottom flask with a stir bar was charged 250 mg flame-dry 4 Å molecular sieves, 14 mg (0.0125 mmol) catalyst **1**, and 232 mg (0.500 mmol) 6-glucose acceptor (**3j**), and 2.5 mL of a 0.1 M solution of galactosyl phosphate donor (**2a**) was added open to air and the flask was closed with a plastic cap and parafilm was used to seal the cap tightly. The mixture was then heated with efficient stirring at 40 °C in an oil bath for 19 hours over which time the mixture thickened. After 19 hours, the mixture is cooled to room temperature and 100  $\mu\text{L}$  aliquot is diluted with diethyl ether and filtered to remove the molecular sieves. This solution is concentrated and  $^1\text{H}$  NMR analysis on the crude mixture is used to determine the anomeric selectivity ( $\beta$ -only). The mixture was then chromatographed directly with 50 g  $\text{SiO}_2$  using an ethyl acetate/hexanes gradient on a Biotage MPLC to afford the product (**4j**) in 75% yield (185 mg, 0.187 mmol) as a single anomer. The spectral data matched previous reports of this compound.<sup>11</sup>

### Preparation of 4k

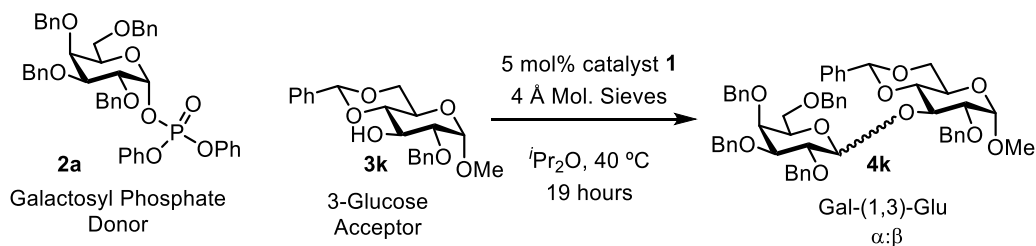

To a flame-dry 5 mL round bottom flask with a stir bar was charged 250 mg flame-dry 4 Å molecular sieves, 14 mg (0.0125 mmol) catalyst **1**, and 186 mg (0.500 mmol) 3-glucose acceptor (**3k**), and 2.5 mL of a 0.1 M solution of galactosyl phosphate donor (**2a**) was added open to air and the flask was closed with a plastic cap and parafilm was used to seal the cap tightly. The mixture was then heated with efficient stirring at 40 °C in an oil bath for 19 hours over which time the mixture thickened. After 19 hours, the mixture is cooled to room temperature and 100  $\mu\text{L}$  aliquot is diluted with diethyl ether and filtered to remove the molecular sieves. This solution is concentrated and  $^1\text{H}$  NMR analysis on the crude mixture is used to determine the anomeric selectivity (96:4  $\beta:\alpha$ ). The mixture was then chromatographed directly with 50 g  $\text{SiO}_2$  using an ether/hexanes gradient on a Biotage MPLC to afford the product (**4k**) in 91% yield (203 mg, 0.227 mmol) as a mixture of anomers. The spectral data matched previous reports of this compound.<sup>12</sup>

### Preparation of 4l

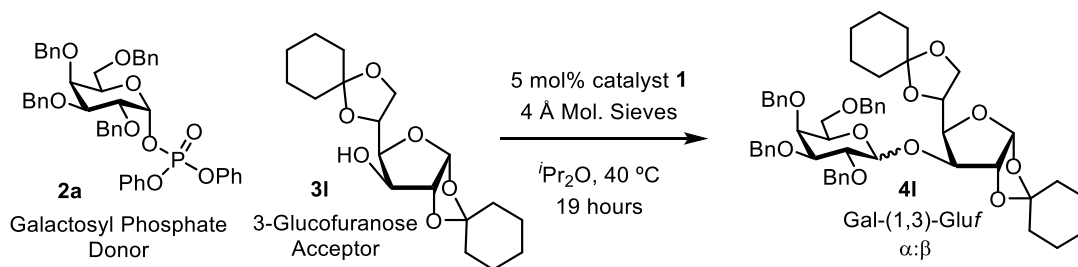

To a flame-dry 5 mL round bottom flask with a stir bar was charged 250 mg flame-dry 4 Å molecular sieves, 14 mg (0.0125 mmol) catalyst **1**, and 170 mg (0.500 mmol) glucofuranose acceptor (**3i**), and 2.5 mL of a 0.1 M solution of galactosyl phosphate donor (**2a**) was added open to air and the flask was closed with a plastic cap and parafilm was used to seal the cap tightly. The mixture was then heated with efficient stirring at 40 °C in an oil bath for 19 hours over which time the mixture thickened. After 19 hours, the mixture is cooled to room temperature and 100  $\mu\text{L}$  aliquot is diluted with diethyl ether and filtered to remove the molecular sieves. This solution is concentrated and  $^1\text{H}$  NMR analysis on the crude mixture is used to determine the anomeric selectivity (96:4  $\beta:\alpha$ ). The mixture was then chromatographed directly with 50 g  $\text{SiO}_2$  using an ether/hexanes gradient on a Biotage MPLC to afford the product (**4j**) in 79% yield (170 mg, 0.197 mmol) as a mixture of anomers. The spectral data matched previous reports of this compound.<sup>13</sup>

#### Preparation of **4r**

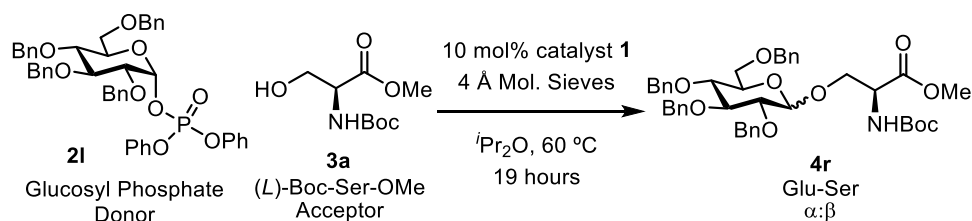

To a flame-dry 10 mL round bottom flask with a stir bar was charged 300 mg flame-dry 4 Å molecular sieves, 11 mg (0.01 mmol) catalyst **1**, and 44 mg (0.200 mmol) serine acceptor (**3a**), and 77 mg (0.100 mmol) glucosyl phosphate donor (**2l**). 3.0 mL diisopropyl ether was added to this mixture (0.033 M in **2l**) open to air and the flask was closed with a plastic cap and parafilm was used to seal the cap tightly. The mixture was then heated with efficient stirring at 60 °C in an oil bath for 19 hours over which time the mixture thickened. After 19 hours, the mixture is cooled to room temperature and 300  $\mu\text{L}$  aliquot is diluted with diethyl ether and filtered to remove the molecular sieves. This solution is concentrated and  $^1\text{H}$  NMR analysis on the crude mixture is used to determine the anomeric selectivity (87:13  $\beta:\alpha$ ). The mixture was then chromatographed directly with 25 g  $\text{SiO}_2$  using an ether/hexanes gradient on a Biotage MPLC to afford the product (**4j**) in 85% yield (63 mg, 0.085 mmol) as a mixture of anomers. The spectral data matched previous reports of this compound.

### 3. X-ray Crystallography Data

#### 3.1 X-ray Data for Catalyst 1

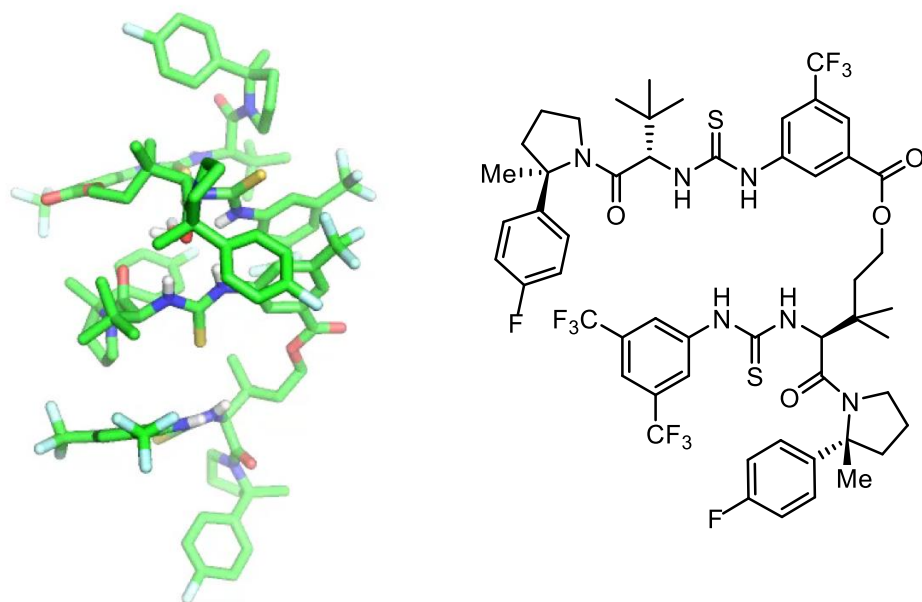

A crystal mounted on a diffractometer was collected data at 100 K. The intensities of the reflections were collected by means of a Bruker APEX II CCD diffractometer (Mo $K\alpha$  radiation,  $\lambda=0.71073$  Å), and equipped with an Oxford Cryosystems nitrogen flow apparatus. The collection method involved  $0.5^\circ$  scans in  $\omega$  at  $28^\circ$  in  $2\theta$ . Data integration down to  $0.84$  Å resolution was carried out using SAINT V8.37A (Bruker diffractometer, 2016) with reflection spot size optimization. Absorption corrections were made with the program SADABS (Bruker diffractometer, 2016). The structure was solved by the Intrinsic Phasing methods and refined by least-squares methods again  $F^2$  using SHELXT-2014 (Sheldrick, 2015) and SHELXL-2014 (Sheldrick, 2015) with OLEX 2 interface (Dolomanov, et al., 2009). Non-hydrogen atoms were refined anisotropically, and hydrogen atoms were allowed to ride on the respective atoms. Crystal data as well as details of data collection and refinement are summarized in Table S1, geometric parameters are shown in Table S2 and hydrogen-bond parameters are listed in Table S3. The Ortep plots produced with SHELXL-2014 program, and the other drawings were produced with Accelrys DS Visualizer 2.0 (Accelrys, 2007).

**Table S1. Experimental details**

|                             | SML-V-FSND                                                                                   |
|-----------------------------|----------------------------------------------------------------------------------------------|
| Crystal data                |                                                                                              |
| Chemical formula            | C <sub>53</sub> H <sub>59</sub> F <sub>11</sub> N <sub>6</sub> O <sub>5</sub> S <sub>2</sub> |
| $M_r$                       | 1133.18                                                                                      |
| Crystal system, space group | Monoclinic, $C2$                                                                             |
| Temperature (K)             | 100                                                                                          |
| $a, b, c$ (Å)               | 33.487 (8), 14.890 (4), 13.878 (3)                                                           |
| $\beta$ (°)                 | 98.545 (6)                                                                                   |
| $V$ (Å <sup>3</sup> )       | 6843 (3)                                                                                     |
| $Z$                         | 4                                                                                            |
| Radiation type              | Mo $K\alpha$                                                                                 |
| $\mu$ (mm <sup>-1</sup> )   | 0.15                                                                                         |

|                                                                            |                                                                                                                                    |
|----------------------------------------------------------------------------|------------------------------------------------------------------------------------------------------------------------------------|
| Crystal size (mm)                                                          | 0.14 × 0.02 × 0.01                                                                                                                 |
| Data collection                                                            |                                                                                                                                    |
| Diffractometer                                                             | Bruker D8 goniometer with CCD area detector                                                                                        |
| Absorption correction                                                      | Multi-scan<br><i>SADABS</i>                                                                                                        |
| $T_{\min}, T_{\max}$                                                       | 0.559, 0.745                                                                                                                       |
| No. of measured, independent and observed [ $I > 2\sigma(I)$ ] reflections | 49271, 11947, 6052                                                                                                                 |
| $R_{\text{int}}$                                                           | 0.165                                                                                                                              |
| $(\sin \theta/\lambda)_{\text{max}}$ ( $\text{\AA}^{-1}$ )                 | 0.597                                                                                                                              |
| Refinement                                                                 |                                                                                                                                    |
| $R[F^2 > 2\sigma(F^2)], wR(F^2), S$                                        | 0.077, 0.183, 0.96                                                                                                                 |
| No. of reflections                                                         | 11947                                                                                                                              |
| No. of parameters                                                          | 760                                                                                                                                |
| No. of restraints                                                          | 451                                                                                                                                |
| H-atom treatment                                                           | H-atom parameters constrained                                                                                                      |
| $\Delta\rho_{\text{max}}, \Delta\rho_{\text{min}}$ ( $\text{e \AA}^{-3}$ ) | 0.33, -0.33                                                                                                                        |
| Absolute structure                                                         | Flack x determined using 2052 quotients $[(I^+)-(I^-)]/[(I^+)+(I^-)]$ (Parsons, Flack and Wagner, Acta Cryst. B69 (2013) 249-259). |
| Absolute structure parameter                                               | -0.06 (9)                                                                                                                          |

Computer programs: *SAINT* 8.37A (Bruker-AXS, 2015), *SHELXT2014* (Sheldrick, 2015), *SHELXL2014* (Sheldrick, 2015), Bruker *SHELXTL* (Sheldrick, 2015).

**Table S2. Geometric parameters ( $\text{\AA}$ ,  $^\circ$ )**

|        |            |          |            |
|--------|------------|----------|------------|
| S1—C13 | 1.659 (8)  | C28—C29  | 1.549 (12) |
| S2—C45 | 1.621 (8)  | C28—H28A | 0.9900     |
| F1—C3  | 1.369 (10) | C28—H28B | 0.9900     |
| F6—C52 | 1.356 (11) | C29—C44  | 1.514 (11) |
| F7—C52 | 1.332 (10) | C29—C30  | 1.54 (2)   |
| F8—C52 | 1.378 (10) | C29—C30A | 1.542 (16) |
| O1—C11 | 1.251 (10) | C30—C35  | 1.39 (2)   |
| O2—C20 | 1.339 (9)  | C30—C31  | 1.42 (2)   |
| O2—C21 | 1.452 (9)  | C31—C32  | 1.38 (2)   |
| O3—C20 | 1.206 (9)  | C31—H31  | 0.9500     |
| O4—C25 | 1.236 (10) | C32—C33  | 1.33 (2)   |

|        |            |           |            |
|--------|------------|-----------|------------|
| N1—C11 | 1.332 (10) | C32—H32   | 0.9500     |
| N1—C10 | 1.461 (11) | C33—F5    | 1.37 (2)   |
| N1—C7  | 1.477 (11) | C33—C34   | 1.43 (2)   |
| N2—C13 | 1.395 (10) | C34—C35   | 1.39 (2)   |
| N2—C12 | 1.466 (10) | C34—H34   | 0.9500     |
| N2—H2  | 0.8800     | C35—H35   | 0.9500     |
| N3—C13 | 1.348 (10) | C30A—C35A | 1.386 (17) |
| N3—C14 | 1.420 (9)  | C30A—C31A | 1.406 (16) |
| N3—H3  | 0.8800     | C31A—C32A | 1.376 (17) |
| N4—C25 | 1.349 (10) | C31A—H31A | 0.9500     |
| N4—C26 | 1.451 (11) | C32A—C33A | 1.344 (19) |
| N4—C29 | 1.492 (11) | C32A—H32A | 0.9500     |
| N5—C45 | 1.340 (9)  | C33A—F5A  | 1.377 (15) |
| N5—C24 | 1.469 (9)  | C33A—C34A | 1.439 (19) |
| N5—H5  | 0.8800     | C34A—C35A | 1.382 (17) |
| N6—C45 | 1.395 (10) | C34A—H34A | 0.9500     |
| N6—C46 | 1.431 (10) | C35A—H35A | 0.9500     |
| N6—H6  | 0.8800     | C36—H36A  | 0.9800     |
| C1—C2  | 1.381 (12) | C36—H36B  | 0.9800     |
| C1—C6  | 1.420 (11) | C36—H36C  | 0.9800     |
| C1—H1  | 0.9500     | C37—C39   | 1.504 (11) |
| C2—C3  | 1.333 (13) | C37—C38   | 1.521 (11) |
| C2—H2A | 0.9500     | C37—C40   | 1.539 (11) |
| C3—C4  | 1.382 (13) | C38—H38A  | 0.9800     |
| C4—C5  | 1.394 (12) | C38—H38B  | 0.9800     |
| C4—H4  | 0.9500     | C38—H38C  | 0.9800     |
| C5—C6  | 1.361 (12) | C39—H39A  | 0.9800     |
| C5—H5A | 0.9500     | C39—H39B  | 0.9800     |
| C6—C7  | 1.543 (13) | C39—H39C  | 0.9800     |
| C7—C36 | 1.525 (13) | C40—H40A  | 0.9800     |
| C7—C8  | 1.566 (12) | C40—H40B  | 0.9800     |
| C8—C9  | 1.491 (13) | C40—H40C  | 0.9800     |
| C8—H8A | 0.9900     | C41—F3    | 1.338 (15) |
| C8—H8B | 0.9900     | C41—F4    | 1.357 (14) |
| C9—C10 | 1.490 (12) | C41—F2    | 1.373 (14) |
| C9—H9A | 0.9900     | C41A—F3A  | 1.32 (2)   |
| C9—H9B | 0.9900     | C41A—F2A  | 1.361 (18) |

|            |            |              |            |
|------------|------------|--------------|------------|
| C10—H10A   | 0.9900     | C41A—F4A     | 1.379 (19) |
| C10—H10B   | 0.9900     | C42—H42A     | 0.9800     |
| C11—C12    | 1.521 (12) | C42—H42B     | 0.9800     |
| C12—C37    | 1.605 (10) | C42—H42C     | 0.9800     |
| C12—H12    | 1.0000     | C43—H43A     | 0.9800     |
| C14—C15    | 1.383 (11) | C43—H43B     | 0.9800     |
| C14—C19    | 1.405 (10) | C43—H43C     | 0.9800     |
| C15—C16    | 1.429 (11) | C44—H44A     | 0.9800     |
| C15—H15    | 0.9500     | C44—H44B     | 0.9800     |
| C16—C17    | 1.391 (11) | C44—H44C     | 0.9800     |
| C16—C41A   | 1.443 (12) | C46—C51      | 1.360 (11) |
| C16—C41    | 1.443 (12) | C46—C47      | 1.393 (12) |
| C17—C18    | 1.383 (10) | C47—C48      | 1.448 (11) |
| C17—H17    | 0.9500     | C47—H47      | 0.9500     |
| C18—C19    | 1.395 (10) | C48—C49      | 1.387 (13) |
| C18—C20    | 1.479 (11) | C48—C52      | 1.435 (13) |
| C19—H19    | 0.9500     | C49—C50      | 1.331 (12) |
| C21—C22    | 1.522 (10) | C49—H49      | 0.9500     |
| C21—H21A   | 0.9900     | C50—C51      | 1.423 (11) |
| C21—H21B   | 0.9900     | C50—C53A     | 1.48 (2)   |
| C22—C23    | 1.515 (10) | C50—C53      | 1.50 (2)   |
| C22—H22A   | 0.9900     | C50—C53B     | 1.501 (18) |
| C22—H22B   | 0.9900     | C51—H51      | 0.9500     |
| C23—C43    | 1.531 (12) | C53—F11      | 1.34 (2)   |
| C23—C42    | 1.554 (10) | C53—F10      | 1.36 (2)   |
| C23—C24    | 1.588 (11) | C53—F9       | 1.40 (2)   |
| C24—C25    | 1.516 (12) | C53A—F11A    | 1.33 (2)   |
| C24—H24    | 1.0000     | C53A—F10A    | 1.35 (2)   |
| C26—C27    | 1.532 (12) | C53A—F9A     | 1.38 (2)   |
| C26—H26A   | 0.9900     | C53B—F11B    | 1.345 (18) |
| C26—H26B   | 0.9900     | C53B—F10B    | 1.365 (18) |
| C27—C28    | 1.504 (12) | C53B—F9B     | 1.396 (18) |
| C27—H27A   | 0.9900     | O1W—H1WA     | 0.8466     |
| C27—H27B   | 0.9900     | O1W—H1WB     | 0.9062     |
|            |            |              |            |
| C20—O2—C21 | 117.6 (6)  | C30—C29—C28  | 110 (4)    |
| C11—N1—C10 | 125.8 (7)  | C30A—C29—C28 | 107 (3)    |

|            |            |                |            |
|------------|------------|----------------|------------|
| C11—N1—C7  | 120.5 (7)  | C35—C30—C31    | 119.1 (19) |
| C10—N1—C7  | 112.8 (7)  | C35—C30—C29    | 119 (3)    |
| C13—N2—C12 | 120.0 (7)  | C31—C30—C29    | 121 (3)    |
| C13—N2—H2  | 120.0      | C32—C31—C30    | 120 (2)    |
| C12—N2—H2  | 120.0      | C32—C31—H31    | 119.8      |
| C13—N3—C14 | 130.2 (7)  | C30—C31—H31    | 119.8      |
| C13—N3—H3  | 114.9      | C33—C32—C31    | 118 (2)    |
| C14—N3—H3  | 114.9      | C33—C32—H32    | 120.9      |
| C25—N4—C26 | 126.0 (8)  | C31—C32—H32    | 120.9      |
| C25—N4—C29 | 121.6 (7)  | C32—C33—F5     | 121 (2)    |
| C26—N4—C29 | 112.1 (7)  | C32—C33—C34    | 125 (2)    |
| C45—N5—C24 | 122.5 (6)  | F5—C33—C34     | 113 (2)    |
| C45—N5—H5  | 118.8      | C35—C34—C33    | 115 (2)    |
| C24—N5—H5  | 118.8      | C35—C34—H34    | 122.5      |
| C45—N6—C46 | 130.4 (7)  | C33—C34—H34    | 122.5      |
| C45—N6—H6  | 114.8      | C34—C35—C30    | 122 (2)    |
| C46—N6—H6  | 114.8      | C34—C35—H35    | 119.1      |
| C2—C1—C6   | 120.3 (9)  | C30—C35—H35    | 119.1      |
| C2—C1—H1   | 119.9      | C35A—C30A—C31A | 118.0 (13) |
| C6—C1—H1   | 119.9      | C35A—C30A—C29  | 120 (2)    |
| C3—C2—C1   | 119.8 (9)  | C31A—C30A—C29  | 122 (2)    |
| C3—C2—H2A  | 120.1      | C32A—C31A—C30A | 121.5 (15) |
| C1—C2—H2A  | 120.1      | C32A—C31A—H31A | 119.3      |
| C2—C3—F1   | 120.5 (9)  | C30A—C31A—H31A | 119.3      |
| C2—C3—C4   | 122.9 (10) | C33A—C32A—C31A | 119.4 (15) |
| F1—C3—C4   | 116.6 (9)  | C33A—C32A—H32A | 120.3      |
| C3—C4—C5   | 116.8 (9)  | C31A—C32A—H32A | 120.3      |
| C3—C4—H4   | 121.6      | C32A—C33A—F5A  | 121.4 (14) |
| C5—C4—H4   | 121.6      | C32A—C33A—C34A | 122.1 (14) |
| C6—C5—C4   | 123.1 (9)  | F5A—C33A—C34A  | 116.5 (15) |
| C6—C5—H5A  | 118.5      | C35A—C34A—C33A | 116.7 (15) |
| C4—C5—H5A  | 118.5      | C35A—C34A—H34A | 121.7      |
| C5—C6—C1   | 117.1 (9)  | C33A—C34A—H34A | 121.7      |
| C5—C6—C7   | 123.0 (8)  | C34A—C35A—C30A | 122.2 (14) |
| C1—C6—C7   | 119.9 (8)  | C34A—C35A—H35A | 118.9      |
| N1—C7—C36  | 112.2 (8)  | C30A—C35A—H35A | 118.9      |
| N1—C7—C6   | 112.1 (7)  | C7—C36—H36A    | 109.5      |

|               |           |               |            |
|---------------|-----------|---------------|------------|
| C36—C7—C6     | 112.4 (8) | C7—C36—H36B   | 109.5      |
| N1—C7—C8      | 101.5 (7) | H36A—C36—H36B | 109.5      |
| C36—C7—C8     | 108.5 (7) | C7—C36—H36C   | 109.5      |
| C6—C7—C8      | 109.4 (7) | H36A—C36—H36C | 109.5      |
| C9—C8—C7      | 103.9 (7) | H36B—C36—H36C | 109.5      |
| C9—C8—H8A     | 111.0     | C39—C37—C38   | 111.7 (7)  |
| C7—C8—H8A     | 111.0     | C39—C37—C40   | 108.6 (6)  |
| C9—C8—H8B     | 111.0     | C38—C37—C40   | 110.1 (7)  |
| C7—C8—H8B     | 111.0     | C39—C37—C12   | 112.9 (7)  |
| H8A—C8—H8B    | 109.0     | C38—C37—C12   | 106.8 (6)  |
| C10—C9—C8     | 105.9 (8) | C40—C37—C12   | 106.6 (7)  |
| C10—C9—H9A    | 110.6     | C37—C38—H38A  | 109.5      |
| C8—C9—H9A     | 110.6     | C37—C38—H38B  | 109.5      |
| C10—C9—H9B    | 110.6     | H38A—C38—H38B | 109.5      |
| C8—C9—H9B     | 110.6     | C37—C38—H38C  | 109.5      |
| H9A—C9—H9B    | 108.7     | H38A—C38—H38C | 109.5      |
| N1—C10—C9     | 104.0 (7) | H38B—C38—H38C | 109.5      |
| N1—C10—H10A   | 111.0     | C37—C39—H39A  | 109.5      |
| C9—C10—H10A   | 111.0     | C37—C39—H39B  | 109.5      |
| N1—C10—H10B   | 111.0     | H39A—C39—H39B | 109.5      |
| C9—C10—H10B   | 111.0     | C37—C39—H39C  | 109.5      |
| H10A—C10—H10B | 109.0     | H39A—C39—H39C | 109.5      |
| O1—C11—N1     | 121.1 (8) | H39B—C39—H39C | 109.5      |
| O1—C11—C12    | 119.4 (8) | C37—C40—H40A  | 109.5      |
| N1—C11—C12    | 119.5 (8) | C37—C40—H40B  | 109.5      |
| N2—C12—C11    | 107.2 (6) | H40A—C40—H40B | 109.5      |
| N2—C12—C37    | 109.1 (6) | C37—C40—H40C  | 109.5      |
| C11—C12—C37   | 114.1 (6) | H40A—C40—H40C | 109.5      |
| N2—C12—H12    | 108.8     | H40B—C40—H40C | 109.5      |
| C11—C12—H12   | 108.8     | F3—C41—F4     | 104.9 (16) |
| C37—C12—H12   | 108.8     | F3—C41—F2     | 106.3 (12) |
| N3—C13—N2     | 111.7 (7) | F4—C41—F2     | 104.3 (11) |
| N3—C13—S1     | 127.8 (6) | F3—C41—C16    | 111.1 (17) |
| N2—C13—S1     | 120.5 (6) | F4—C41—C16    | 118.6 (13) |
| C15—C14—C19   | 120.0 (7) | F2—C41—C16    | 110.7 (12) |
| C15—C14—N3    | 116.1 (7) | F3A—C41A—F2A  | 107.5 (18) |
| C19—C14—N3    | 123.9 (7) | F3A—C41A—F4A  | 105 (2)    |



|               |           |               |            |
|---------------|-----------|---------------|------------|
| C14—C15—C16   | 119.8 (8) | F2A—C41A—F4A  | 103.7 (14) |
| C14—C15—H15   | 120.1     | F3A—C41A—C16  | 116 (2)    |
| C16—C15—H15   | 120.1     | F2A—C41A—C16  | 113.1 (18) |
| C17—C16—C15   | 120.0 (8) | F4A—C41A—C16  | 109.9 (17) |
| C17—C16—C41A  | 119.0 (8) | C23—C42—H42A  | 109.5      |
| C15—C16—C41A  | 120.9 (8) | C23—C42—H42B  | 109.5      |
| C17—C16—C41   | 119.0 (8) | H42A—C42—H42B | 109.5      |
| C15—C16—C41   | 120.9 (8) | C23—C42—H42C  | 109.5      |
| C18—C17—C16   | 119.0 (7) | H42A—C42—H42C | 109.5      |
| C18—C17—H17   | 120.5     | H42B—C42—H42C | 109.5      |
| C16—C17—H17   | 120.5     | C23—C43—H43A  | 109.5      |
| C17—C18—C19   | 122.0 (7) | C23—C43—H43B  | 109.5      |
| C17—C18—C20   | 117.2 (7) | H43A—C43—H43B | 109.5      |
| C19—C18—C20   | 120.7 (7) | C23—C43—H43C  | 109.5      |
| C18—C19—C14   | 119.2 (7) | H43A—C43—H43C | 109.5      |
| C18—C19—H19   | 120.4     | H43B—C43—H43C | 109.5      |
| C14—C19—H19   | 120.4     | C29—C44—H44A  | 109.5      |
| O3—C20—O2     | 123.0 (7) | C29—C44—H44B  | 109.5      |
| O3—C20—C18    | 124.2 (8) | H44A—C44—H44B | 109.5      |
| O2—C20—C18    | 112.8 (7) | C29—C44—H44C  | 109.5      |
| O2—C21—C22    | 108.2 (6) | H44A—C44—H44C | 109.5      |
| O2—C21—H21A   | 110.1     | H44B—C44—H44C | 109.5      |
| C22—C21—H21A  | 110.1     | N5—C45—N6     | 108.7 (7)  |
| O2—C21—H21B   | 110.1     | N5—C45—S2     | 124.1 (6)  |
| C22—C21—H21B  | 110.1     | N6—C45—S2     | 127.2 (6)  |
| H21A—C21—H21B | 108.4     | C51—C46—C47   | 122.7 (8)  |
| C23—C22—C21   | 116.8 (7) | C51—C46—N6    | 124.4 (8)  |
| C23—C22—H22A  | 108.1     | C47—C46—N6    | 112.9 (8)  |
| C21—C22—H22A  | 108.1     | C46—C47—C48   | 117.7 (9)  |
| C23—C22—H22B  | 108.1     | C46—C47—H47   | 121.1      |
| C21—C22—H22B  | 108.1     | C48—C47—H47   | 121.1      |
| H22A—C22—H22B | 107.3     | C49—C48—C52   | 121.9 (9)  |
| C22—C23—C43   | 114.7 (7) | C49—C48—C47   | 118.9 (9)  |
| C22—C23—C42   | 109.2 (6) | C52—C48—C47   | 119.0 (9)  |
| C43—C23—C42   | 106.7 (7) | C50—C49—C48   | 120.9 (8)  |
| C22—C23—C24   | 109.7 (6) | C50—C49—H49   | 119.6      |
| C43—C23—C24   | 108.4 (6) | C48—C49—H49   | 119.6      |

|               |            |                 |            |
|---------------|------------|-----------------|------------|
| C42—C23—C24   | 108.0 (6)  | C49—C50—C51     | 122.3 (8)  |
| N5—C24—C25    | 107.7 (7)  | C49—C50—C53A    | 118.5 (14) |
| N5—C24—C23    | 108.6 (6)  | C51—C50—C53A    | 119.2 (14) |
| C25—C24—C23   | 115.1 (6)  | C49—C50—C53     | 119.6 (14) |
| N5—C24—H24    | 108.4      | C51—C50—C53     | 118.0 (14) |
| C25—C24—H24   | 108.4      | C49—C50—C53B    | 123.7 (11) |
| C23—C24—H24   | 108.4      | C51—C50—C53B    | 113.9 (12) |
| O4—C25—N4     | 122.1 (8)  | C46—C51—C50     | 117.6 (8)  |
| O4—C25—C24    | 119.6 (8)  | C46—C51—H51     | 121.2      |
| N4—C25—C24    | 118.2 (8)  | C50—C51—H51     | 121.2      |
| N4—C26—C27    | 104.2 (8)  | F7—C52—F6       | 106.3 (9)  |
| N4—C26—H26A   | 110.9      | F7—C52—F8       | 104.9 (8)  |
| C27—C26—H26A  | 110.9      | F6—C52—F8       | 103.2 (8)  |
| N4—C26—H26B   | 110.9      | F7—C52—C48      | 115.2 (9)  |
| C27—C26—H26B  | 110.9      | F6—C52—C48      | 114.9 (8)  |
| H26A—C26—H26B | 108.9      | F8—C52—C48      | 111.2 (8)  |
| C28—C27—C26   | 102.6 (7)  | F11—C53—F10     | 111 (2)    |
| C28—C27—H27A  | 111.3      | F11—C53—F9      | 101 (2)    |
| C26—C27—H27A  | 111.3      | F10—C53—F9      | 104 (2)    |
| C28—C27—H27B  | 111.3      | F11—C53—C50     | 114 (2)    |
| C26—C27—H27B  | 111.3      | F10—C53—C50     | 113 (2)    |
| H27A—C27—H27B | 109.2      | F9—C53—C50      | 113 (2)    |
| C27—C28—C29   | 103.7 (7)  | F11A—C53A—F10A  | 109 (2)    |
| C27—C28—H28A  | 111.0      | F11A—C53A—F9A   | 109 (2)    |
| C29—C28—H28A  | 111.0      | F10A—C53A—F9A   | 110 (2)    |
| C27—C28—H28B  | 111.0      | F11A—C53A—C50   | 113 (2)    |
| C29—C28—H28B  | 111.0      | F10A—C53A—C50   | 109 (2)    |
| H28A—C28—H28B | 109.0      | F9A—C53A—C50    | 108.2 (19) |
| N4—C29—C44    | 113.1 (7)  | F11B—C53B—F10B  | 106.2 (16) |
| N4—C29—C30    | 107 (2)    | F11B—C53B—F9B   | 103.7 (16) |
| C44—C29—C30   | 114 (3)    | F10B—C53B—F9B   | 103.4 (16) |
| N4—C29—C30A   | 115.3 (15) | F11B—C53B—C50   | 117.6 (16) |
| C44—C29—C30A  | 109 (2)    | F10B—C53B—C50   | 111.8 (16) |
| N4—C29—C28    | 100.8 (7)  | F9B—C53B—C50    | 112.9 (16) |
| C44—C29—C28   | 110.8 (7)  | H1WA—O1W—H1WB   | 94.0       |
|               |            |                 |            |
| C6—C1—C2—C3   | 2.3 (14)   | C27—C28—C29—C44 | -155.0 (8) |

|                    |            |                         |           |
|--------------------|------------|-------------------------|-----------|
| C1—C2—C3—F1        | 178.4 (8)  | C27—C28—C29—C30         | 78 (2)    |
| C1—C2—C3—C4        | -1.4 (15)  | C27—C28—C29—C30A        | 85.9 (16) |
| C2—C3—C4—C5        | 0.8 (14)   | N4—C29—C30—C35          | -166 (7)  |
| F1—C3—C4—C5        | -179.0 (8) | C44—C29—C30—C35         | -40 (9)   |
| C3—C4—C5—C6        | -1.1 (14)  | C28—C29—C30—C35         | 85 (8)    |
| C4—C5—C6—C1        | 1.9 (13)   | N4—C29—C30—C31          | 18 (9)    |
| C4—C5—C6—C7        | -177.7 (8) | C44—C29—C30—C31         | 144 (7)   |
| C2—C1—C6—C5        | -2.5 (13)  | C28—C29—C30—C31         | -91 (8)   |
| C2—C1—C6—C7        | 177.2 (8)  | C35—C30—C31—C32         | -4 (11)   |
| C11—N1—C7—C36      | -63.1 (10) | C29—C30—C31—C32         | 172 (7)   |
| C10—N1—C7—C36      | 127.1 (8)  | C30—C31—C32—C33         | 5 (9)     |
| C11—N1—C7—C6       | 64.6 (9)   | C31—C32—C33—F5          | 177 (5)   |
| C10—N1—C7—C6       | -105.2 (8) | C31—C32—C33—C34         | -3 (7)    |
| C11—N1—C7—C8       | -178.8 (7) | C32—C33—C34—C35         | 1 (7)     |
| C10—N1—C7—C8       | 11.4 (8)   | F5—C33—C34—C35          | -180 (5)  |
| C5—C6—C7—N1        | -154.1 (8) | C33—C34—C35—C30         | 0 (9)     |
| C1—C6—C7—N1        | 26.2 (11)  | C31—C30—C35—C34         | 2 (11)    |
| C5—C6—C7—C36       | -26.6 (12) | C29—C30—C35—C34         | -174 (7)  |
| C1—C6—C7—C36       | 153.8 (8)  | N4—C29—C30A—C35A        | -168 (4)  |
| C5—C6—C7—C8        | 94.1 (10)  | C44—C29—C30A—C35A       | -40 (5)   |
| C1—C6—C7—C8        | -85.5 (10) | C28—C29—C30A—C35A       | 80 (5)    |
| N1—C7—C8—C9        | -28.0 (9)  | N4—C29—C30A—C31A        | 13 (6)    |
| C36—C7—C8—C9       | -146.4 (9) | C44—C29—C30A—C31A       | 141 (5)   |
| C6—C7—C8—C9        | 90.6 (9)   | C28—C29—C30A—C31A       | -99 (5)   |
| C7—C8—C9—C10       | 35.4 (10)  | C35A—C30A—C31A—<br>C32A | -2 (7)    |
| C11—N1—C10—C9      | -159.5 (8) | C29—C30A—C31A—<br>C32A  | 177 (4)   |
| C7—N1—C10—C9       | 9.7 (9)    | C30A—C31A—C32A—<br>C33A | 1 (5)     |
| C8—C9—C10—N1       | -28.1 (10) | C31A—C32A—C33A—<br>F5A  | -179 (3)  |
| C10—N1—C11—O1      | 173.3 (7)  | C31A—C32A—C33A—<br>C34A | 0 (4)     |
| C7—N1—C11—O1       | 4.9 (11)   | C32A—C33A—C34A—<br>C35A | 0 (4)     |
| C10—N1—C11—<br>C12 | -7.9 (11)  | F5A—C33A—C34A—<br>C35A  | 179 (3)   |
| C7—N1—C11—C12      | -176.4 (6) | C33A—C34A—C35A—<br>C30A | -1 (5)    |

|                      |            |                         |             |
|----------------------|------------|-------------------------|-------------|
| C13—N2—C12—<br>C11   | -89.7 (8)  | C31A—C30A—C35A—<br>C34A | 2 (7)       |
| C13—N2—C12—<br>C37   | 146.3 (7)  | C29—C30A—C35A—<br>C34A  | -177 (4)    |
| O1—C11—C12—N2        | -41.5 (9)  | N2—C12—C37—C39          | 64.5 (9)    |
| N1—C11—C12—N2        | 139.8 (7)  | C11—C12—C37—C39         | -55.4 (10)  |
| O1—C11—C12—<br>C37   | 79.5 (8)   | N2—C12—C37—C38          | -58.7 (8)   |
| N1—C11—C12—<br>C37   | -99.3 (8)  | C11—C12—C37—C38         | -178.6 (7)  |
| C14—N3—C13—N2        | 178.9 (7)  | N2—C12—C37—C40          | -176.4 (6)  |
| C14—N3—C13—S1        | -1.6 (12)  | C11—C12—C37—C40         | 63.7 (9)    |
| C12—N2—C13—N3        | 174.4 (6)  | C17—C16—C41—F3          | -77.2 (15)  |
| C12—N2—C13—S1        | -5.1 (10)  | C15—C16—C41—F3          | 99.0 (15)   |
| C13—N3—C14—<br>C15   | -163.9 (8) | C17—C16—C41—F4          | 161.2 (15)  |
| C13—N3—C14—<br>C19   | 15.1 (12)  | C15—C16—C41—F4          | -22.6 (18)  |
| C19—C14—C15—<br>C16  | -0.2 (11)  | C17—C16—C41—F2          | 40.7 (17)   |
| N3—C14—C15—<br>C16   | 178.9 (7)  | C15—C16—C41—F2          | -143.0 (14) |
| C14—C15—C16—<br>C17  | -1.0 (12)  | C17—C16—C41A—F3A        | -54.8 (19)  |
| C14—C15—C16—<br>C41A | -177.3 (8) | C15—C16—C41A—F3A        | 121.4 (17)  |
| C14—C15—C16—<br>C41  | -177.3 (8) | C17—C16—C41A—F2A        | 70.3 (17)   |
| C15—C16—C17—<br>C18  | 1.7 (12)   | C15—C16—C41A—F2A        | -113.5 (16) |
| C41A—C16—C17—<br>C18 | 177.9 (8)  | C17—C16—C41A—F4A        | -174.3 (16) |
| C41—C16—C17—<br>C18  | 177.9 (8)  | C15—C16—C41A—F4A        | 1.9 (18)    |
| C16—C17—C18—<br>C19  | -1.1 (12)  | C24—N5—C45—N6           | 170.1 (7)   |
| C16—C17—C18—<br>C20  | -178.0 (7) | C24—N5—C45—S2           | -8.7 (11)   |
| C17—C18—C19—<br>C14  | 0.0 (11)   | C46—N6—C45—N5           | 170.5 (7)   |
| C20—C18—C19—<br>C14  | 176.7 (7)  | C46—N6—C45—S2           | -10.7 (13)  |

|                     |            |                  |             |
|---------------------|------------|------------------|-------------|
| C15—C14—C19—<br>C18 | 0.7 (11)   | C45—N6—C46—C51   | -8.4 (13)   |
| N3—C14—C19—<br>C18  | -178.2 (7) | C45—N6—C46—C47   | 174.4 (8)   |
| C21—O2—C20—O3       | 0.7 (11)   | C51—C46—C47—C48  | 1.1 (12)    |
| C21—O2—C20—<br>C18  | -179.3 (6) | N6—C46—C47—C48   | 178.3 (7)   |
| C17—C18—C20—<br>O3  | -7.1 (12)  | C46—C47—C48—C49  | -0.5 (12)   |
| C19—C18—C20—<br>O3  | 176.0 (8)  | C46—C47—C48—C52  | 175.6 (8)   |
| C17—C18—C20—<br>O2  | 172.9 (7)  | C52—C48—C49—C50  | -176.8 (9)  |
| C19—C18—C20—<br>O2  | -4.0 (10)  | C47—C48—C49—C50  | -0.8 (12)   |
| C20—O2—C21—<br>C22  | 158.9 (6)  | C48—C49—C50—C51  | 1.5 (13)    |
| O2—C21—C22—<br>C23  | 78.4 (8)   | C48—C49—C50—C53A | -176.8 (15) |
| C21—C22—C23—<br>C43 | -43.5 (9)  | C48—C49—C50—C53  | -174.9 (15) |
| C21—C22—C23—<br>C42 | 76.1 (8)   | C48—C49—C50—C53B | -175.2 (12) |
| C21—C22—C23—<br>C24 | -165.7 (6) | C47—C46—C51—C50  | -0.4 (13)   |
| C45—N5—C24—<br>C25  | -80.9 (9)  | N6—C46—C51—C50   | -177.3 (7)  |
| C45—N5—C24—<br>C23  | 153.8 (7)  | C49—C50—C51—C46  | -0.9 (13)   |
| C22—C23—C24—<br>N5  | 72.4 (8)   | C53A—C50—C51—C46 | 177.4 (15)  |
| C43—C23—C24—<br>N5  | -53.5 (8)  | C53—C50—C51—C46  | 175.5 (15)  |
| C42—C23—C24—<br>N5  | -168.7 (7) | C53B—C50—C51—C46 | 176.1 (12)  |
| C22—C23—C24—<br>C25 | -48.4 (9)  | C49—C48—C52—F7   | 79.9 (11)   |
| C43—C23—C24—<br>C25 | -174.3 (7) | C47—C48—C52—F7   | -96.1 (10)  |
| C42—C23—C24—<br>C25 | 70.5 (9)   | C49—C48—C52—F6   | -156.0 (8)  |
| C26—N4—C25—O4       | 165.4 (7)  | C47—C48—C52—F6   | 28.0 (12)   |
| C29—N4—C25—O4       | -8.3 (11)  | C49—C48—C52—F8   | -39.3 (12)  |

|                     |            |                   |             |
|---------------------|------------|-------------------|-------------|
| C26—N4—C25—<br>C24  | -18.1 (11) | C47—C48—C52—F8    | 144.8 (8)   |
| C29—N4—C25—<br>C24  | 168.3 (6)  | C49—C50—C53—F11   | -146 (2)    |
| N5—C24—C25—O4       | -36.3 (9)  | C51—C50—C53—F11   | 37 (3)      |
| C23—C24—C25—<br>O4  | 85.0 (9)   | C49—C50—C53—F10   | -18 (3)     |
| N5—C24—C25—N4       | 147.1 (7)  | C51—C50—C53—F10   | 165 (2)     |
| C23—C24—C25—<br>N4  | -91.7 (8)  | C49—C50—C53—F9    | 100 (3)     |
| C25—N4—C26—<br>C27  | -165.5 (7) | C51—C50—C53—F9    | -77 (3)     |
| C29—N4—C26—<br>C27  | 8.7 (9)    | C49—C50—C53A—F11A | 148 (2)     |
| N4—C26—C27—<br>C28  | -30.7 (9)  | C51—C50—C53A—F11A | -30 (3)     |
| C26—C27—C28—<br>C29 | 41.0 (9)   | C49—C50—C53A—F10A | -91 (2)     |
| C25—N4—C29—<br>C44  | -51.1 (10) | C51—C50—C53A—F10A | 91 (2)      |
| C26—N4—C29—<br>C44  | 134.4 (8)  | C49—C50—C53A—F9A  | 28 (3)      |
| C25—N4—C29—<br>C30  | 76 (5)     | C51—C50—C53A—F9A  | -150.2 (19) |
| C26—N4—C29—<br>C30  | -99 (5)    | C49—C50—C53B—F11B | -172.4 (18) |
| C25—N4—C29—<br>C30A | 76 (3)     | C51—C50—C53B—F11B | 11 (2)      |
| C26—N4—C29—<br>C30A | -99 (3)    | C49—C50—C53B—F10B | -49 (2)     |
| C25—N4—C29—<br>C28  | -169.5 (7) | C51—C50—C53B—F10B | 133.8 (18)  |
| C26—N4—C29—<br>C28  | 16.1 (8)   | C49—C50—C53B—F9B  | 67 (2)      |
| C27—C28—C29—<br>N4  | -35.0 (8)  | C51—C50—C53B—F9B  | -110.1 (18) |

**Table S3. Hydrogen-bond parameters**

| $D-H\cdots A$                  | $D-H$ (Å) | $H\cdots A$ (Å) | $D\cdots A$ (Å) | $D-H\cdots A$ (°) |
|--------------------------------|-----------|-----------------|-----------------|-------------------|
| N2—H2 $\cdots$ O4 <sup>i</sup> | 0.88      | 2.08            | 2.908 (10)      | 156.3             |
| N3—H3 $\cdots$ O4 <sup>i</sup> | 0.88      | 2.19            | 3.022 (9)       | 158.4             |
| N5—H5 $\cdots$ O1W             | 0.88      | 2.08            | 2.878 (8)       | 151.0             |

|                                 |      |      |           |       |
|---------------------------------|------|------|-----------|-------|
| N6—H6···O1W                     | 0.88 | 2.02 | 2.869 (8) | 160.8 |
| O1W—<br>H1WA···O1 <sup>ii</sup> | 0.85 | 2.15 | 2.709 (7) | 123.3 |
| O1W—H1WB···S1                   | 0.91 | 2.36 | 3.155 (6) | 145.7 |

Symmetry code(s): (i)  $-x+3/2, y-1/2, -z+1$ ; (ii)  $-x+3/2, y+1/2, -z+1$ .

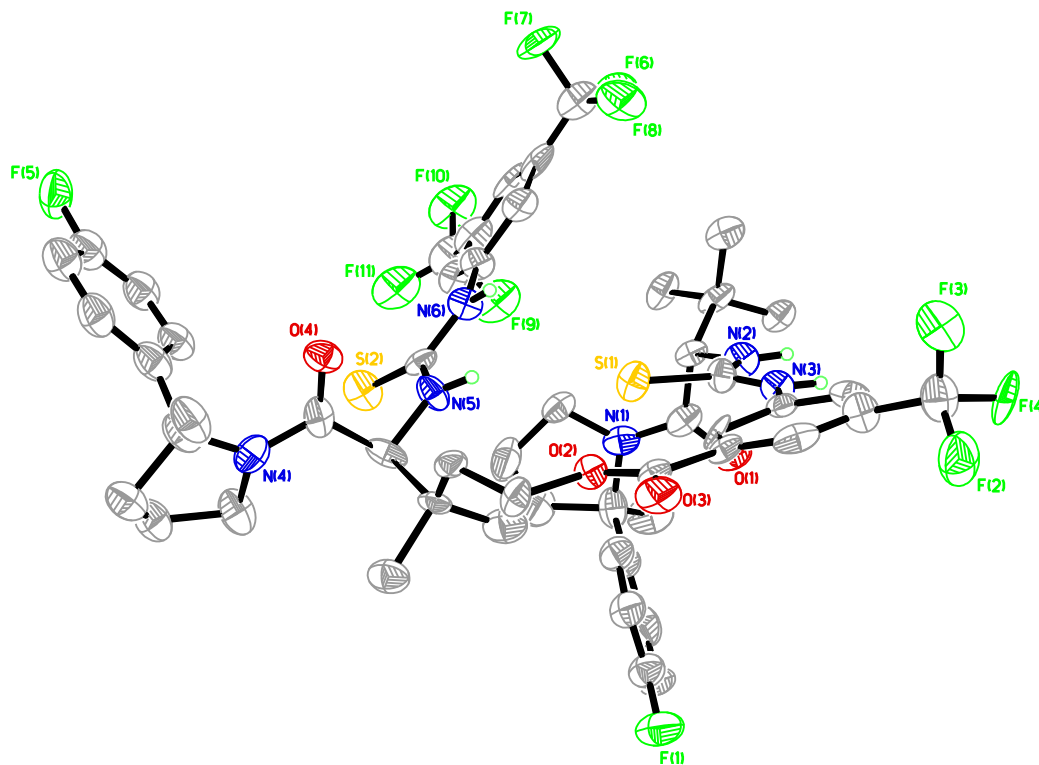

**Figure S1.** Perspective views showing 50% probability displacement

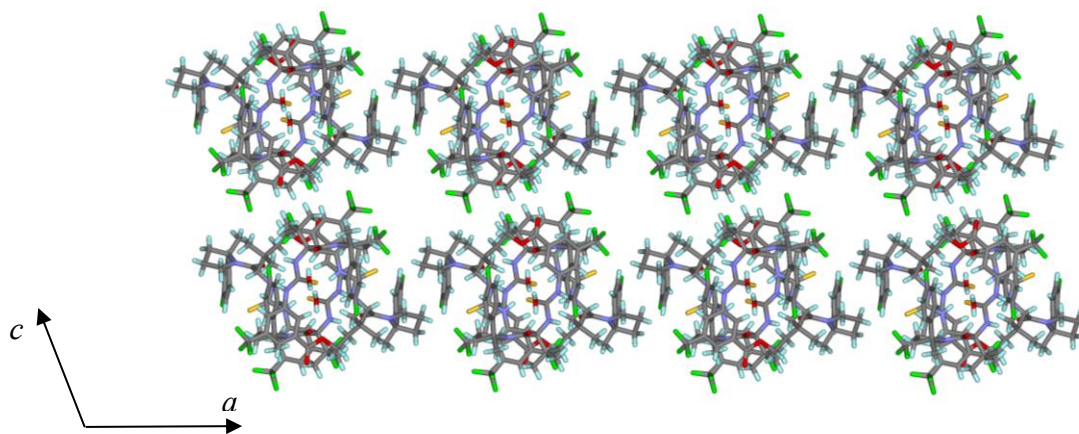

**Figure S2.** Three-dimensional supramolecular architecture viewed along the *b*-axis direction.

### 3.2 X-ray Data for Galactosyl Phosphate 2a

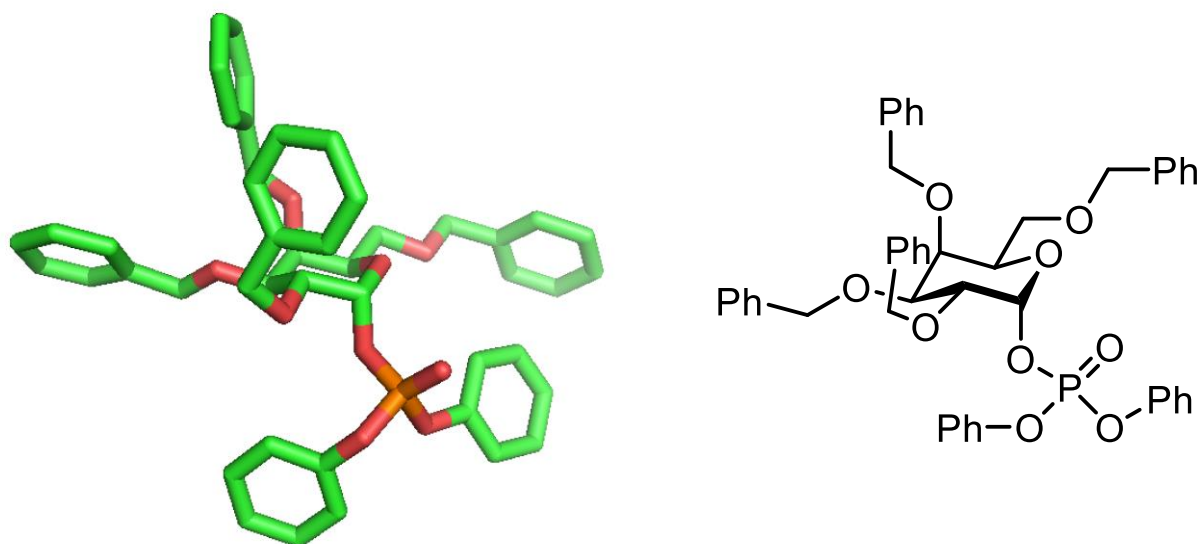

**X-ray Crystallography:** A crystal mounted on a diffractometer was collected data at 100 K. The intensities of the reflections were collected by means of a Bruker APEX DUO CCD diffractometer (Cu $K\alpha$  radiation,  $\lambda=1.54178$  Å), and equipped with an Oxford Cryosystems nitrogen flow apparatus. The collection method involved  $1.0^\circ$  scans in  $\omega$  at  $-30^\circ$ ,  $-55^\circ$ ,  $-80^\circ$ ,  $30^\circ$ ,  $55^\circ$ ,  $80^\circ$  and  $115^\circ$  in  $2\theta$ . Data integration down to  $0.84$  Å resolution was carried out using SAINT V8.37 A (Bruker diffractometer, 2015) with reflection spot size optimization. Absorption corrections were made with the program SADABS (Bruker diffractometer, 2015). The structure was solved by the Intrinsic Phasing methods and refined by least-squares methods against  $F^2$  using SHELXT-2014 (Sheldrick, 2015) and SHELXL-2014 (Sheldrick, 2015) with OLEX 2 interface (Dolomanov, et al., 2009). Non-hydrogen atoms were refined anisotropically, and hydrogen atoms were allowed to ride on the respective atoms. Crystal data as well as details of data collection and refinement are summarized in Table S4, and geometric parameters are shown in Table S5. The Ortep plots produced with SHELXL-2014 program, and the other drawings were produced with Accelrys DS Visualizer 2.0 (Accelrys, 2007).

**Table S4. Experimental details**

|                             | SML-VI-99                                        |
|-----------------------------|--------------------------------------------------|
| Crystal data                |                                                  |
| Chemical formula            | C <sub>46</sub> H <sub>45</sub> O <sub>9</sub> P |
| $M_r$                       | 772.79                                           |
| Crystal system, space group | Orthorhombic, $P2_12_12_1$                       |
| Temperature (K)             | 100                                              |
| $a, b, c$ (Å)               | 9.6908 (2), 10.5229 (2), 39.4294 (9)             |
| $V$ (Å <sup>3</sup> )       | 4020.83 (15)                                     |
| $Z$                         | 4                                                |
| Radiation type              | Cu $K\alpha$                                     |
| $\mu$ (mm <sup>-1</sup> )   | 1.07                                             |
| Crystal size (mm)           | 0.18 × 0.12 × 0.10                               |



|                                                                            |                                                                                                                                    |
|----------------------------------------------------------------------------|------------------------------------------------------------------------------------------------------------------------------------|
| Data collection                                                            |                                                                                                                                    |
| Diffractometer                                                             | Bruker D8 goniometer with CCD area detector                                                                                        |
| Absorption correction                                                      | Multi-scan<br><i>SADABS</i>                                                                                                        |
| $T_{\min}, T_{\max}$                                                       | 0.751, 0.806                                                                                                                       |
| No. of measured, independent and observed [ $I > 2\sigma(I)$ ] reflections | 100800, 7124, 7027                                                                                                                 |
| $R_{\text{int}}$                                                           | 0.033                                                                                                                              |
| $(\sin \theta/\lambda)_{\text{max}}$ ( $\text{\AA}^{-1}$ )                 | 0.596                                                                                                                              |
| Refinement                                                                 |                                                                                                                                    |
| $R[F^2 > 2\sigma(F^2)], wR(F^2), S$                                        | 0.027, 0.068, 1.06                                                                                                                 |
| No. of reflections                                                         | 7124                                                                                                                               |
| No. of parameters                                                          | 505                                                                                                                                |
| H-atom treatment                                                           | H-atom parameters constrained                                                                                                      |
| $\Delta\rho_{\text{max}}, \Delta\rho_{\text{min}}$ ( $\text{e \AA}^{-3}$ ) | 0.46, -0.28                                                                                                                        |
| Absolute structure                                                         | Flack x determined using 2986 quotients $[(I^+)-(I^-)]/[(I^+)+(I^-)]$ (Parsons, Flack and Wagner, Acta Cryst. B69 (2013) 249-259). |
| Absolute structure parameter                                               | 0.009 (4)                                                                                                                          |

Computer programs: *APEX3* v2016.9-0 (Bruker-AXS, 2016), *SAINT* 8.37A (Bruker-AXS, 2015), *SHELXT2014* (Sheldrick, 2015), *SHELXL2014* (Sheldrick, 2015), Bruker *SHELXTL* (Sheldrick, 2015).

**Table S5. Geometric parameters ( $\text{\AA}$ ,  $^\circ$ )**

|        |             |          |           |
|--------|-------------|----------|-----------|
| P1—O5  | 1.4556 (15) | C20—C25  | 1.376 (3) |
| P1—O2  | 1.5623 (14) | C20—C21  | 1.383 (3) |
| P1—O3  | 1.5692 (15) | C21—C22  | 1.390 (3) |
| P1—O4  | 1.5829 (15) | C21—H21  | 0.9500    |
| O1—C1  | 1.385 (2)   | C22—C23  | 1.383 (4) |
| O1—C5  | 1.451 (2)   | C22—H22  | 0.9500    |
| O2—C1  | 1.465 (2)   | C23—C24  | 1.392 (4) |
| O3—C14 | 1.412 (2)   | C23—H23  | 0.9500    |
| O4—C20 | 1.416 (3)   | C24—C25  | 1.384 (3) |
| O6—C2  | 1.423 (2)   | C24—H24  | 0.9500    |
| O6—C26 | 1.441 (2)   | C25—H25  | 0.9500    |
| O7—C33 | 1.423 (2)   | C26—C27  | 1.510 (3) |
| O7—C3  | 1.427 (2)   | C26—H26A | 0.9900    |

|         |           |          |           |
|---------|-----------|----------|-----------|
| O8—C40  | 1.429 (2) | C26—H26B | 0.9900    |
| O8—C4   | 1.432 (2) | C27—C32  | 1.384 (3) |
| O9—C6   | 1.422 (2) | C27—C28  | 1.393 (3) |
| O9—C7   | 1.430 (3) | C28—C29  | 1.383 (3) |
| C1—C2   | 1.519 (3) | C28—H28  | 0.9500    |
| C1—H1   | 1.0000    | C29—C30  | 1.388 (3) |
| C2—C3   | 1.520 (3) | C29—H29  | 0.9500    |
| C2—H2   | 1.0000    | C30—C31  | 1.390 (3) |
| C3—C4   | 1.532 (3) | C30—H30  | 0.9500    |
| C3—H3   | 1.0000    | C31—C32  | 1.387 (3) |
| C4—C5   | 1.522 (3) | C31—H31  | 0.9500    |
| C4—H4   | 1.0000    | C32—H32  | 0.9500    |
| C5—C6   | 1.508 (3) | C33—C34  | 1.505 (3) |
| C5—H5   | 1.0000    | C33—H33A | 0.9900    |
| C6—H6A  | 0.9900    | C33—H33B | 0.9900    |
| C6—H6B  | 0.9900    | C34—C35  | 1.386 (3) |
| C7—C8   | 1.496 (3) | C34—C39  | 1.395 (3) |
| C7—H7A  | 0.9900    | C35—C36  | 1.391 (3) |
| C7—H7B  | 0.9900    | C35—H35  | 0.9500    |
| C8—C9   | 1.390 (4) | C36—C37  | 1.380 (3) |
| C8—C13  | 1.404 (4) | C36—H36  | 0.9500    |
| C9—C10  | 1.382 (4) | C37—C38  | 1.386 (3) |
| C9—H9   | 0.9500    | C37—H37  | 0.9500    |
| C10—C11 | 1.380 (4) | C38—C39  | 1.384 (3) |
| C10—H10 | 0.9500    | C38—H38  | 0.9500    |
| C11—C12 | 1.377 (4) | C39—H39  | 0.9500    |
| C11—H11 | 0.9500    | C40—C41  | 1.502 (3) |
| C12—C13 | 1.388 (4) | C40—H40A | 0.9900    |
| C12—H12 | 0.9500    | C40—H40B | 0.9900    |
| C13—H13 | 0.9500    | C41—C46  | 1.382 (3) |
| C14—C19 | 1.373 (3) | C41—C42  | 1.397 (3) |
| C14—C15 | 1.374 (3) | C42—C43  | 1.385 (3) |
| C15—C16 | 1.378 (3) | C42—H42  | 0.9500    |
| C15—H15 | 0.9500    | C43—C44  | 1.381 (3) |
| C16—C17 | 1.365 (4) | C43—H43  | 0.9500    |
| C16—H16 | 0.9500    | C44—C45  | 1.382 (3) |
| C17—C18 | 1.396 (4) | C44—H44  | 0.9500    |

|           |             |               |             |
|-----------|-------------|---------------|-------------|
| C17—H17   | 0.9500      | C45—C46       | 1.391 (3)   |
| C18—C19   | 1.403 (3)   | C45—H45       | 0.9500      |
| C18—H18   | 0.9500      | C46—H46       | 0.9500      |
| C19—H19   | 0.9500      |               |             |
|           |             |               |             |
| O5—P1—O2  | 115.98 (8)  | C18—C19—H19   | 121.1       |
| O5—P1—O3  | 116.95 (9)  | C25—C20—C21   | 122.4 (2)   |
| O2—P1—O3  | 105.33 (8)  | C25—C20—O4    | 118.26 (19) |
| O5—P1—O4  | 111.73 (9)  | C21—C20—O4    | 119.2 (2)   |
| O2—P1—O4  | 105.97 (8)  | C20—C21—C22   | 118.7 (2)   |
| O3—P1—O4  | 99.08 (8)   | C20—C21—H21   | 120.7       |
| C1—O1—C5  | 113.98 (15) | C22—C21—H21   | 120.7       |
| C1—O2—P1  | 123.14 (12) | C23—C22—C21   | 120.0 (2)   |
| C14—O3—P1 | 127.18 (13) | C23—C22—H22   | 120.0       |
| C20—O4—P1 | 123.54 (12) | C21—C22—H22   | 120.0       |
| C2—O6—C26 | 113.24 (14) | C22—C23—C24   | 120.0 (2)   |
| C33—O7—C3 | 112.67 (14) | C22—C23—H23   | 120.0       |
| C40—O8—C4 | 114.44 (15) | C24—C23—H23   | 120.0       |
| C6—O9—C7  | 110.60 (17) | C25—C24—C23   | 120.6 (2)   |
| O1—C1—O2  | 108.79 (15) | C25—C24—H24   | 119.7       |
| O1—C1—C2  | 112.74 (16) | C23—C24—H24   | 119.7       |
| O2—C1—C2  | 108.11 (15) | C20—C25—C24   | 118.3 (2)   |
| O1—C1—H1  | 109.0       | C20—C25—H25   | 120.9       |
| O2—C1—H1  | 109.0       | C24—C25—H25   | 120.9       |
| C2—C1—H1  | 109.0       | O6—C26—C27    | 112.98 (16) |
| O6—C2—C1  | 107.64 (15) | O6—C26—H26A   | 109.0       |
| O6—C2—C3  | 112.69 (16) | C27—C26—H26A  | 109.0       |
| C1—C2—C3  | 110.58 (15) | O6—C26—H26B   | 109.0       |
| O6—C2—H2  | 108.6       | C27—C26—H26B  | 109.0       |
| C1—C2—H2  | 108.6       | H26A—C26—H26B | 107.8       |
| C3—C2—H2  | 108.6       | C32—C27—C28   | 119.0 (2)   |
| O7—C3—C2  | 107.54 (15) | C32—C27—C26   | 119.86 (18) |
| O7—C3—C4  | 111.89 (15) | C28—C27—C26   | 121.15 (19) |
| C2—C3—C4  | 108.28 (16) | C29—C28—C27   | 120.5 (2)   |
| O7—C3—H3  | 109.7       | C29—C28—H28   | 119.8       |
| C2—C3—H3  | 109.7       | C27—C28—H28   | 119.8       |
| C4—C3—H3  | 109.7       | C28—C29—C30   | 120.2 (2)   |

|             |             |               |             |
|-------------|-------------|---------------|-------------|
| O8—C4—C5    | 108.76 (15) | C28—C29—H29   | 119.9       |
| O8—C4—C3    | 109.20 (15) | C30—C29—H29   | 119.9       |
| C5—C4—C3    | 110.29 (16) | C29—C30—C31   | 119.7 (2)   |
| O8—C4—H4    | 109.5       | C29—C30—H30   | 120.2       |
| C5—C4—H4    | 109.5       | C31—C30—H30   | 120.2       |
| C3—C4—H4    | 109.5       | C32—C31—C30   | 119.8 (2)   |
| O1—C5—C6    | 106.84 (16) | C32—C31—H31   | 120.1       |
| O1—C5—C4    | 111.25 (15) | C30—C31—H31   | 120.1       |
| C6—C5—C4    | 110.91 (16) | C27—C32—C31   | 120.87 (19) |
| O1—C5—H5    | 109.3       | C27—C32—H32   | 119.6       |
| C6—C5—H5    | 109.3       | C31—C32—H32   | 119.6       |
| C4—C5—H5    | 109.3       | O7—C33—C34    | 110.32 (16) |
| O9—C6—C5    | 109.39 (17) | O7—C33—H33A   | 109.6       |
| O9—C6—H6A   | 109.8       | C34—C33—H33A  | 109.6       |
| C5—C6—H6A   | 109.8       | O7—C33—H33B   | 109.6       |
| O9—C6—H6B   | 109.8       | C34—C33—H33B  | 109.6       |
| C5—C6—H6B   | 109.8       | H33A—C33—H33B | 108.1       |
| H6A—C6—H6B  | 108.2       | C35—C34—C39   | 118.45 (18) |
| O9—C7—C8    | 108.5 (2)   | C35—C34—C33   | 123.50 (18) |
| O9—C7—H7A   | 110.0       | C39—C34—C33   | 117.98 (18) |
| C8—C7—H7A   | 110.0       | C34—C35—C36   | 120.59 (19) |
| O9—C7—H7B   | 110.0       | C34—C35—H35   | 119.7       |
| C8—C7—H7B   | 110.0       | C36—C35—H35   | 119.7       |
| H7A—C7—H7B  | 108.4       | C37—C36—C35   | 120.6 (2)   |
| C9—C8—C13   | 119.1 (2)   | C37—C36—H36   | 119.7       |
| C9—C8—C7    | 120.9 (3)   | C35—C36—H36   | 119.7       |
| C13—C8—C7   | 119.9 (3)   | C36—C37—C38   | 119.1 (2)   |
| C10—C9—C8   | 120.3 (2)   | C36—C37—H37   | 120.5       |
| C10—C9—H9   | 119.8       | C38—C37—H37   | 120.5       |
| C8—C9—H9    | 119.8       | C39—C38—C37   | 120.5 (2)   |
| C11—C10—C9  | 120.1 (3)   | C39—C38—H38   | 119.7       |
| C11—C10—H10 | 120.0       | C37—C38—H38   | 119.7       |
| C9—C10—H10  | 120.0       | C38—C39—C34   | 120.7 (2)   |
| C12—C11—C10 | 120.6 (2)   | C38—C39—H39   | 119.7       |
| C12—C11—H11 | 119.7       | C34—C39—H39   | 119.7       |
| C10—C11—H11 | 119.7       | O8—C40—C41    | 107.99 (17) |
| C11—C12—C13 | 119.9 (2)   | O8—C40—H40A   | 110.1       |

|              |              |                     |              |
|--------------|--------------|---------------------|--------------|
| C11—C12—H12  | 120.0        | C41—C40—H40A        | 110.1        |
| C13—C12—H12  | 120.0        | O8—C40—H40B         | 110.1        |
| C12—C13—C8   | 120.0 (3)    | C41—C40—H40B        | 110.1        |
| C12—C13—H13  | 120.0        | H40A—C40—H40B       | 108.4        |
| C8—C13—H13   | 120.0        | C46—C41—C42         | 118.70 (19)  |
| C19—C14—C15  | 123.6 (2)    | C46—C41—C40         | 121.28 (19)  |
| C19—C14—O3   | 114.00 (19)  | C42—C41—C40         | 119.97 (18)  |
| C15—C14—O3   | 122.34 (19)  | C43—C42—C41         | 120.61 (19)  |
| C14—C15—C16  | 117.6 (2)    | C43—C42—H42         | 119.7        |
| C14—C15—H15  | 121.2        | C41—C42—H42         | 119.7        |
| C16—C15—H15  | 121.2        | C44—C43—C42         | 120.1 (2)    |
| C17—C16—C15  | 121.4 (2)    | C44—C43—H43         | 119.9        |
| C17—C16—H16  | 119.3        | C42—C43—H43         | 119.9        |
| C15—C16—H16  | 119.3        | C43—C44—C45         | 119.8 (2)    |
| C16—C17—C18  | 120.4 (2)    | C43—C44—H44         | 120.1        |
| C16—C17—H17  | 119.8        | C45—C44—H44         | 120.1        |
| C18—C17—H17  | 119.8        | C44—C45—C46         | 120.1 (2)    |
| C17—C18—C19  | 119.3 (2)    | C44—C45—H45         | 119.9        |
| C17—C18—H18  | 120.3        | C46—C45—H45         | 119.9        |
| C19—C18—H18  | 120.3        | C41—C46—C45         | 120.7 (2)    |
| C14—C19—C18  | 117.7 (2)    | C41—C46—H46         | 119.7        |
| C14—C19—H19  | 121.1        | C45—C46—H46         | 119.7        |
|              |              |                     |              |
| O5—P1—O2—C1  | -7.50 (17)   | P1—O3—C14—C15       | -33.6 (3)    |
| O3—P1—O2—C1  | -138.51 (14) | C19—C14—C15—<br>C16 | 0.8 (3)      |
| O4—P1—O2—C1  | 117.10 (14)  | O3—C14—C15—C16      | -177.41 (19) |
| O5—P1—O3—C14 | -48.10 (19)  | C14—C15—C16—<br>C17 | -0.5 (3)     |
| O2—P1—O3—C14 | 82.35 (17)   | C15—C16—C17—<br>C18 | -0.1 (4)     |
| O4—P1—O3—C14 | -168.22 (17) | C16—C17—C18—<br>C19 | 0.4 (4)      |
| O5—P1—O4—C20 | -178.69 (15) | C15—C14—C19—<br>C18 | -0.5 (3)     |
| O2—P1—O4—C20 | 54.13 (17)   | O3—C14—C19—C18      | 177.83 (19)  |
| O3—P1—O4—C20 | -54.79 (17)  | C17—C18—C19—<br>C14 | -0.1 (3)     |
| C5—O1—C1—O2  | 63.81 (18)   | P1—O4—C20—C25       | -95.9 (2)    |

|              |              |                     |              |
|--------------|--------------|---------------------|--------------|
| C5—O1—C1—C2  | -56.1 (2)    | P1—O4—C20—C21       | 88.4 (2)     |
| P1—O2—C1—O1  | 112.83 (16)  | C25—C20—C21—<br>C22 | 0.2 (3)      |
| P1—O2—C1—C2  | -124.44 (15) | O4—C20—C21—C22      | 175.75 (18)  |
| C26—O6—C2—C1 | 138.80 (16)  | C20—C21—C22—<br>C23 | -0.8 (3)     |
| C26—O6—C2—C3 | -99.01 (18)  | C21—C22—C23—<br>C24 | 1.0 (4)      |
| O1—C1—C2—O6  | 179.48 (15)  | C22—C23—C24—<br>C25 | -0.6 (4)     |
| O2—C1—C2—O6  | 59.19 (19)   | C21—C20—C25—<br>C24 | 0.2 (3)      |
| O1—C1—C2—C3  | 56.0 (2)     | O4—C20—C25—C24      | -175.41 (18) |
| O2—C1—C2—C3  | -64.3 (2)    | C23—C24—C25—<br>C20 | 0.0 (3)      |
| C33—O7—C3—C2 | -160.96 (15) | C2—O6—C26—C27       | -62.1 (2)    |
| C33—O7—C3—C4 | 80.26 (19)   | O6—C26—C27—C32      | 125.11 (19)  |
| O6—C2—C3—O7  | 63.58 (19)   | O6—C26—C27—C28      | -55.3 (2)    |
| C1—C2—C3—O7  | -175.90 (15) | C32—C27—C28—<br>C29 | -0.6 (3)     |
| O6—C2—C3—C4  | -175.34 (15) | C26—C27—C28—<br>C29 | 179.77 (18)  |
| C1—C2—C3—C4  | -54.8 (2)    | C27—C28—C29—<br>C30 | 0.2 (3)      |
| C40—O8—C4—C5 | 134.53 (17)  | C28—C29—C30—<br>C31 | 0.4 (3)      |
| C40—O8—C4—C3 | -105.07 (19) | C29—C30—C31—<br>C32 | -0.7 (3)     |
| O7—C3—C4—O8  | 54.2 (2)     | C28—C27—C32—<br>C31 | 0.4 (3)      |
| C2—C3—C4—O8  | -64.17 (19)  | C26—C27—C32—<br>C31 | 179.99 (18)  |
| O7—C3—C4—C5  | 173.63 (15)  | C30—C31—C32—<br>C27 | 0.3 (3)      |
| C2—C3—C4—C5  | 55.29 (19)   | C3—O7—C33—C34       | -179.03 (15) |
| C1—O1—C5—C6  | 177.07 (16)  | O7—C33—C34—C35      | -15.0 (3)    |
| C1—O1—C5—C4  | 55.9 (2)     | O7—C33—C34—C39      | 168.04 (17)  |
| O8—C4—C5—O1  | 64.6 (2)     | C39—C34—C35—<br>C36 | 1.8 (3)      |
| C3—C4—C5—O1  | -55.1 (2)    | C33—C34—C35—<br>C36 | -175.13 (18) |

|                     |              |                     |             |
|---------------------|--------------|---------------------|-------------|
| O8—C4—C5—C6         | -54.2 (2)    | C34—C35—C36—<br>C37 | 0.1 (3)     |
| C3—C4—C5—C6         | -173.92 (17) | C35—C36—C37—<br>C38 | -1.2 (3)    |
| C7—O9—C6—C5         | 176.2 (2)    | C36—C37—C38—<br>C39 | 0.2 (3)     |
| O1—C5—C6—O9         | 66.2 (2)     | C37—C38—C39—<br>C34 | 1.8 (3)     |
| C4—C5—C6—O9         | -172.42 (17) | C35—C34—C39—<br>C38 | -2.8 (3)    |
| C6—O9—C7—C8         | 171.7 (2)    | C33—C34—C39—<br>C38 | 174.34 (19) |
| O9—C7—C8—C9         | 95.8 (3)     | C4—O8—C40—C41       | 163.65 (16) |
| O9—C7—C8—C13        | -81.7 (3)    | O8—C40—C41—C46      | 131.7 (2)   |
| C13—C8—C9—C10       | 1.2 (4)      | O8—C40—C41—C42      | -50.9 (3)   |
| C7—C8—C9—C10        | -176.3 (2)   | C46—C41—C42—<br>C43 | -0.5 (3)    |
| C8—C9—C10—C11       | -0.5 (4)     | C40—C41—C42—<br>C43 | -178.0 (2)  |
| C9—C10—C11—C12      | -0.8 (4)     | C41—C42—C43—<br>C44 | 0.7 (3)     |
| C10—C11—C12—<br>C13 | 1.3 (4)      | C42—C43—C44—<br>C45 | -0.4 (3)    |
| C11—C12—C13—C8      | -0.6 (3)     | C43—C44—C45—<br>C46 | -0.1 (3)    |
| C9—C8—C13—C12       | -0.7 (3)     | C42—C41—C46—<br>C45 | 0.0 (3)     |
| C7—C8—C13—C12       | 176.8 (2)    | C40—C41—C46—<br>C45 | 177.4 (2)   |
| P1—O3—C14—C19       | 148.04 (16)  | C44—C45—C46—<br>C41 | 0.3 (4)     |

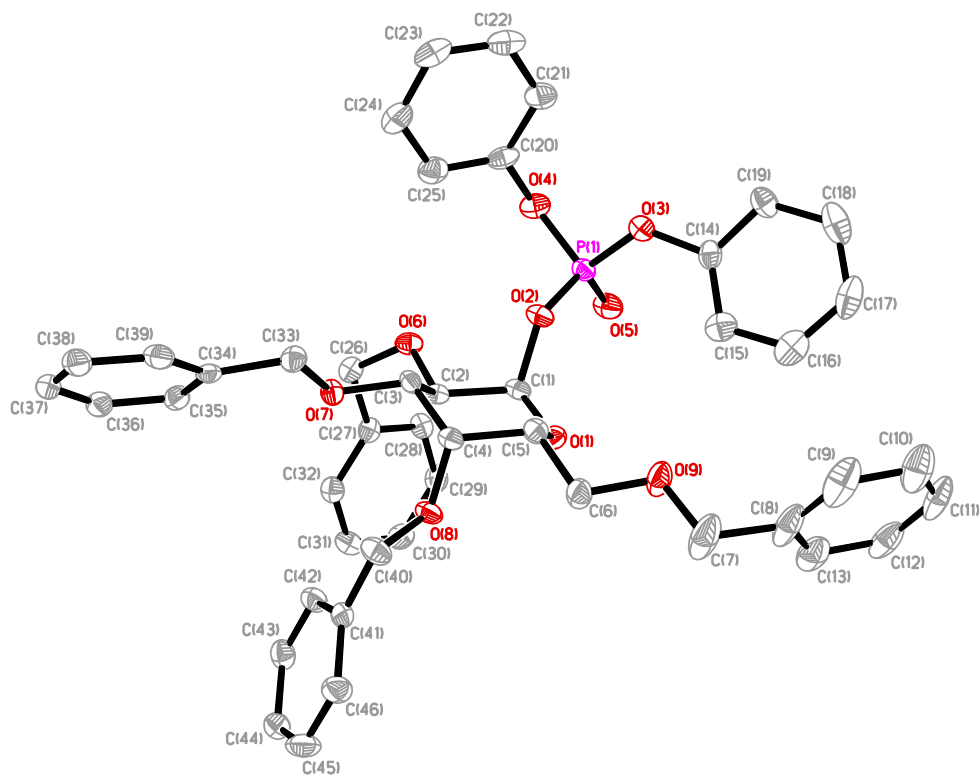

**Figure S3.** Perspective views showing 50% probability displacement

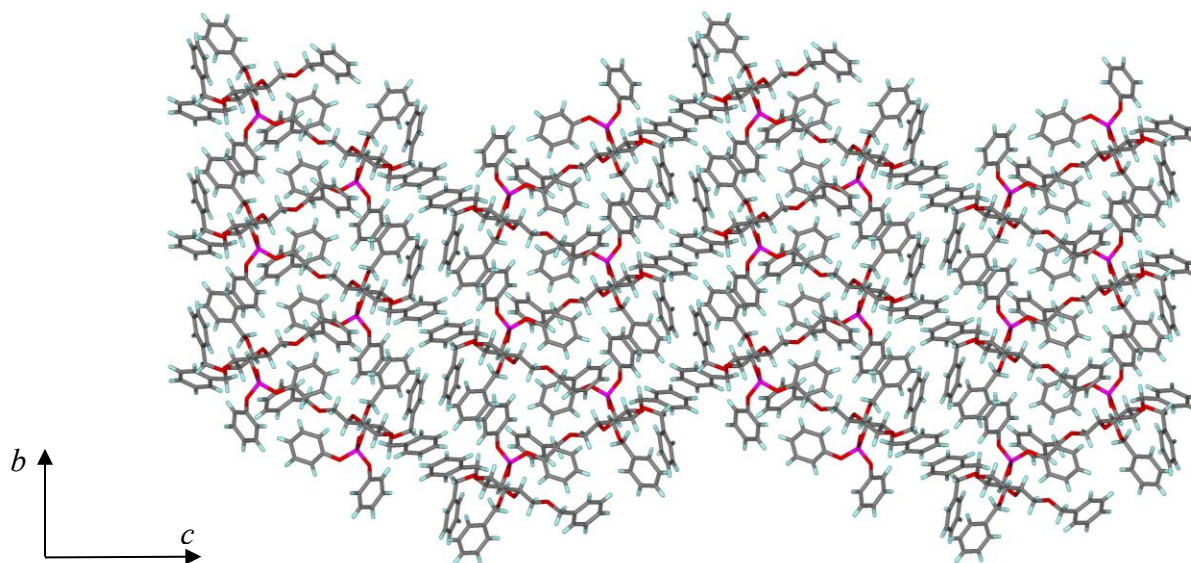

**Figure S4.** Three-dimensional supramolecular architecture viewed along the *a*-axis direction.



#### 4. Catalyst Evaluation for Glycosyl Phosphate Activation

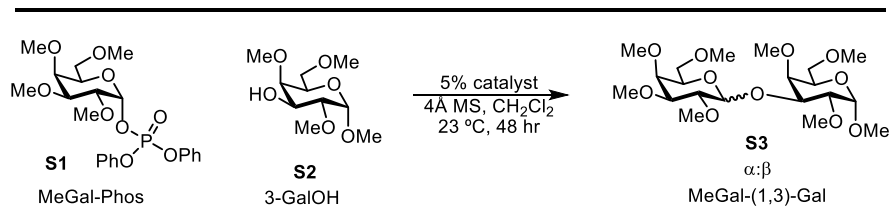

Sieves do not sequester phosphoric acid when used in  $\text{CH}_2\text{Cl}_2$

\*Trace conversion <10%

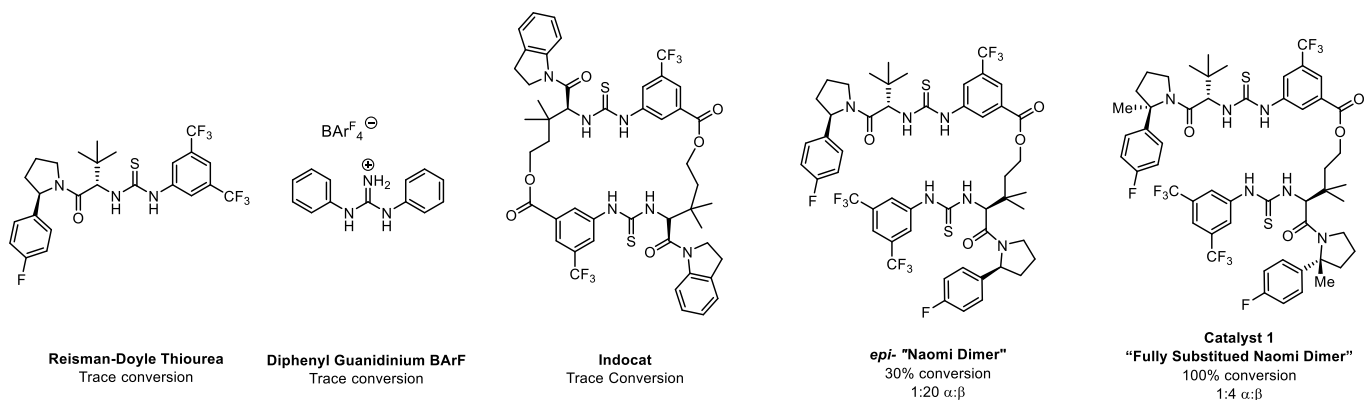

**Scheme S1.** Preliminary catalyst screen with Galactose-Galactose model system

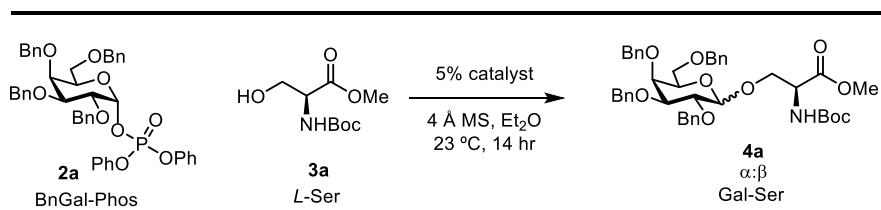

\*Trace conversion <10%

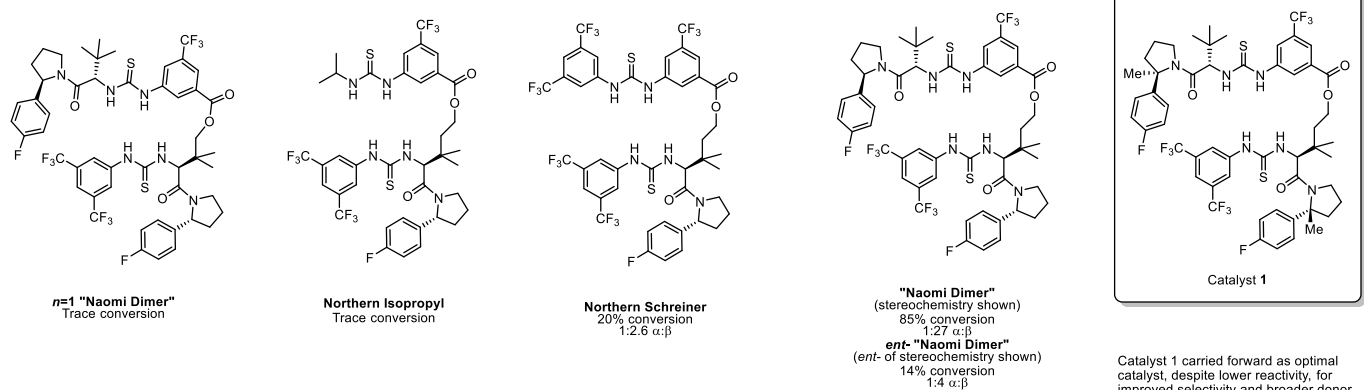

Catalyst 1 carried forward as optimal catalyst, despite lower reactivity, for improved selectivity and broader donor scope.

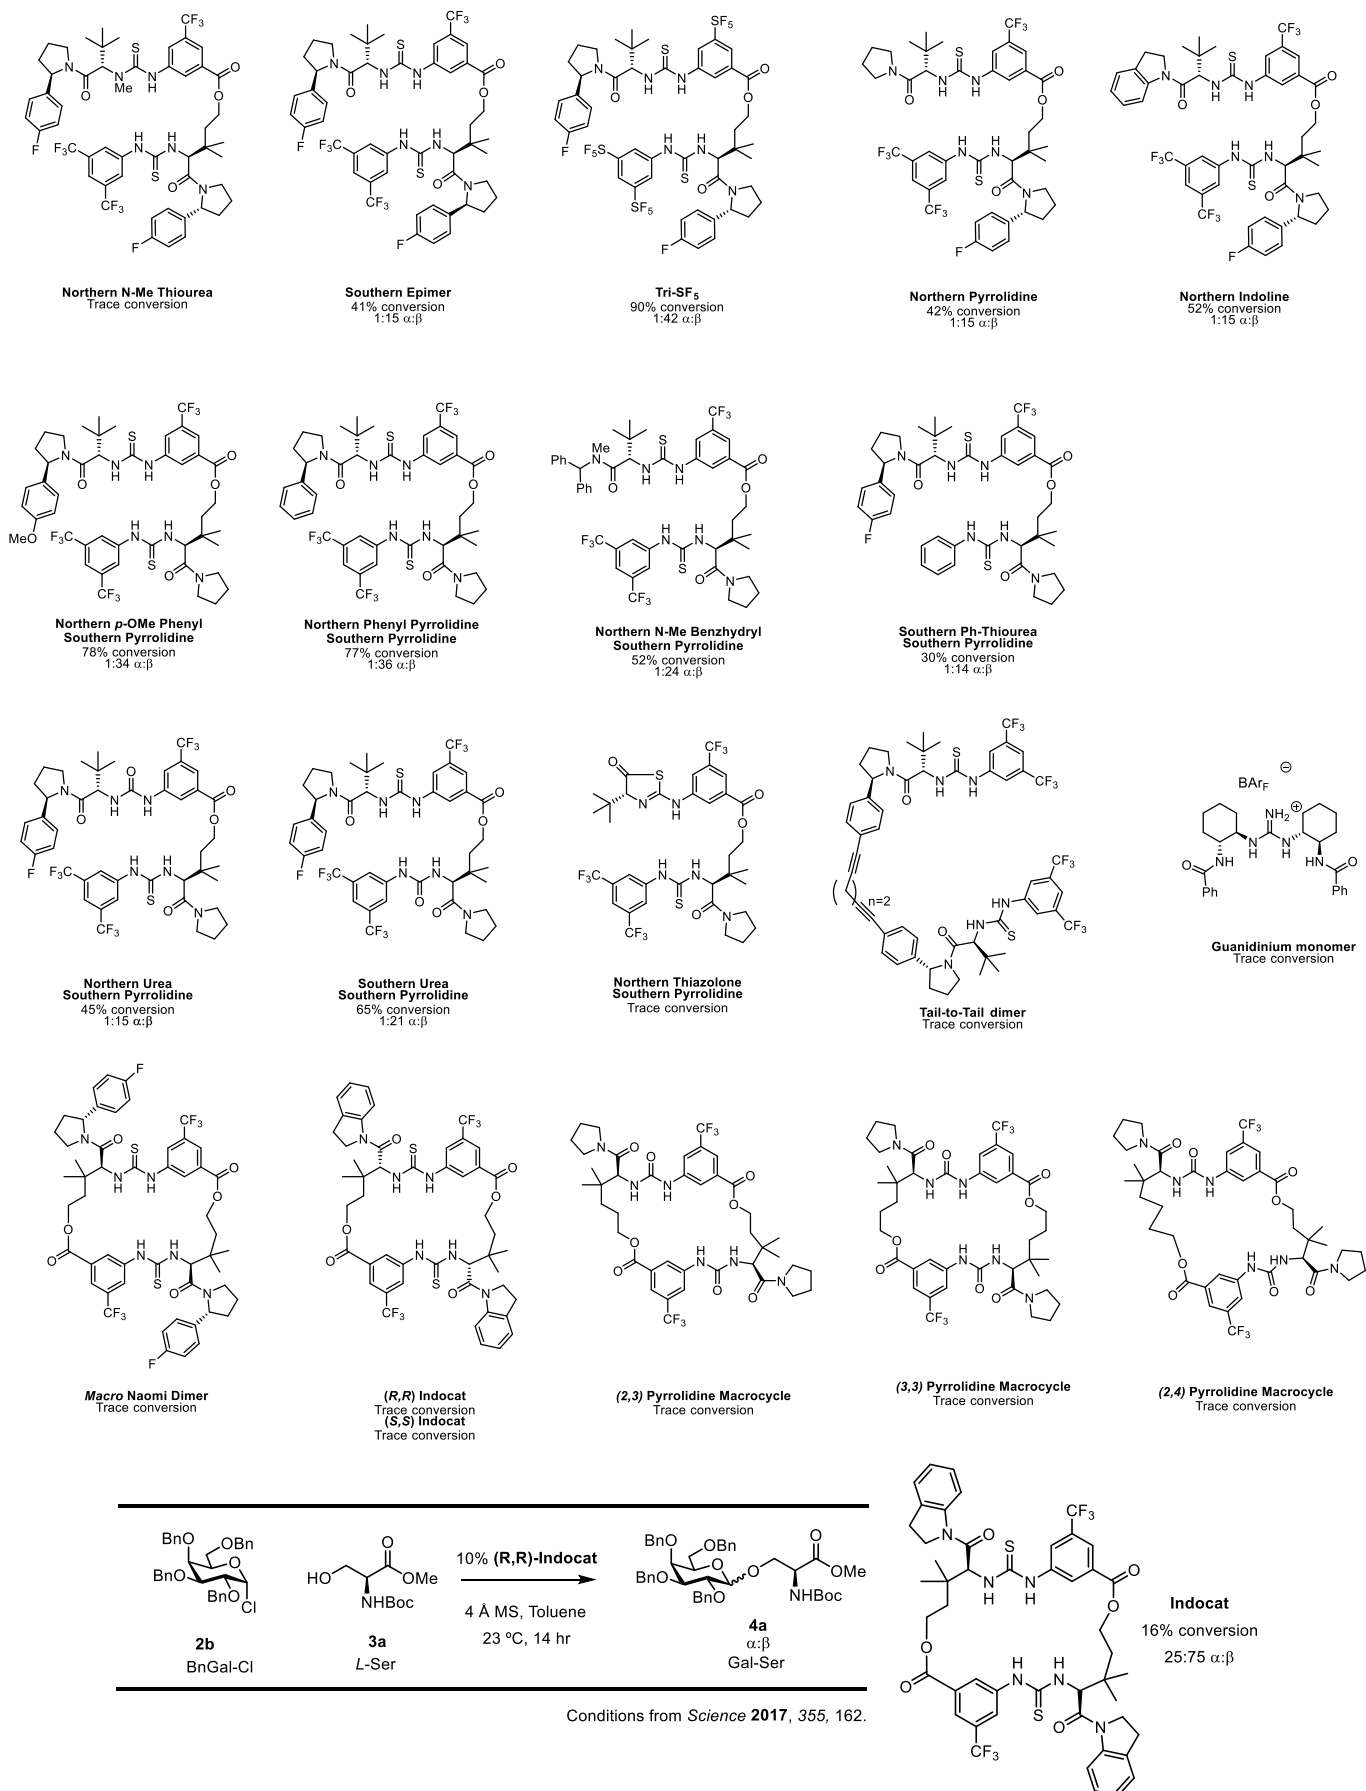

**Scheme S2.** Catalyst screen with Galactose-Serine model system

**General Procedure:** To a 0.5 dram vial was added catalyst, donor, acceptor, and molecular sieves. The vial was charged with a stir-bar and solvent was added (open to air). The mixture was sealed with a PTFE cap and stirred at the indicated temperature. For workup, the mixture was diluted with diethyl ether, filtered, and concentrated. This concentrated mixture was promptly diluted with CDCl<sub>3</sub> and analyzed immediately by <sup>1</sup>H NMR analysis using a single scan. Conversion was determined to highly correlate with yield and was calculated by integrating product relative to starting material and hydrolysis byproduct (the only isolable side-product).

**Note:** For reactions run in ethereal solvents and aromatic solvents, no phosphoric acid is visible in the NMR spectra. See **Section 5** for data and discussion.

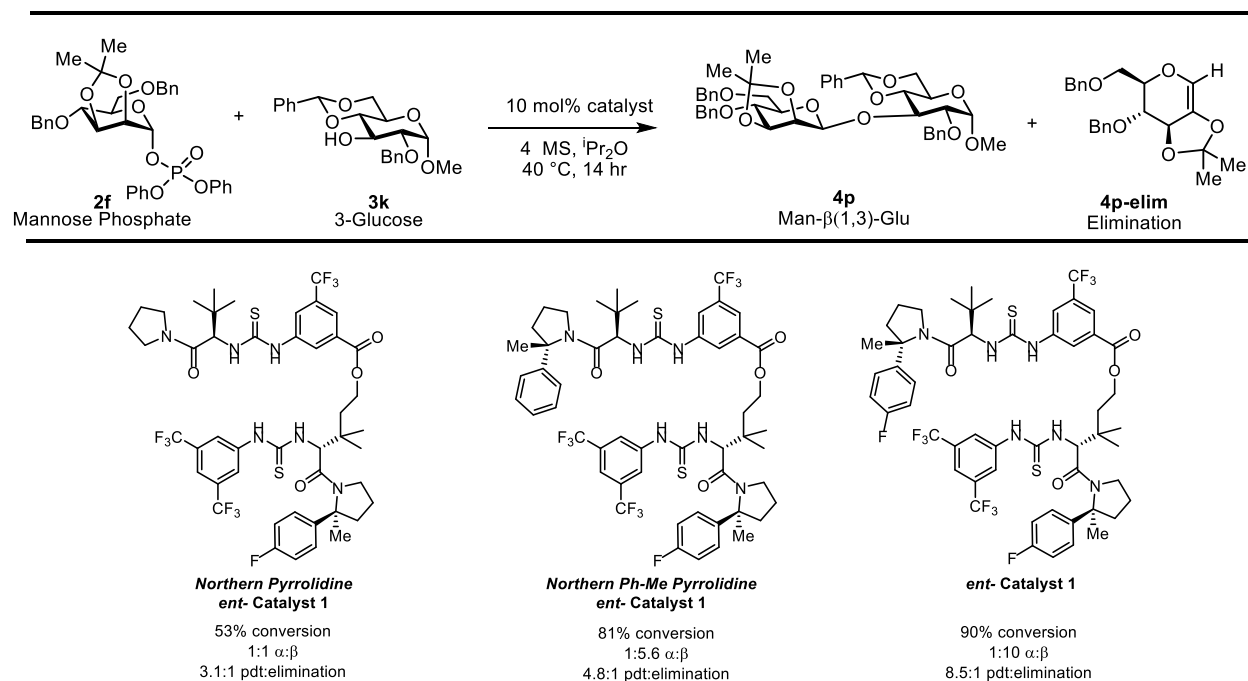

**Scheme S3.** Catalyst screen with Mannose-Glucose model system

## 5. Leaving Group Evaluation

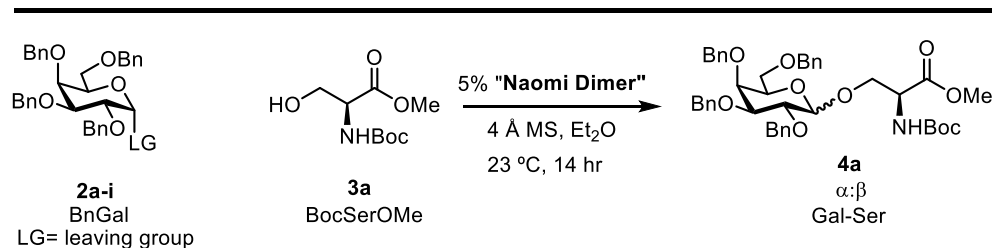

### Leaving group survey

| Leaving group                            | % Conversion    | α:β             |
|------------------------------------------|-----------------|-----------------|
| -Cl ( <b>2b</b> )                        | 48%             | <1:20           |
| <b>-OP(O)(OPh)<sub>2</sub> (2a)</b>      | <b>100%</b>     | <b>&lt;1:20</b> |
| -OAc ( <b>2d</b> )                       | 0%              | N/A             |
| -OC(NH)(CCl <sub>3</sub> ) ( <b>2c</b> ) | 0%              | N/A             |
| -OMs* ( <b>2h</b> )                      | background only | 2:1             |
| -ONO <sub>2</sub> ** ( <b>2i</b> )       | 0%              | N/A             |

\*Performed in CH<sub>2</sub>Cl<sub>2</sub> following *in-situ* activation with Ms<sub>2</sub>O

\*\*2-Azido Galactose was used due to safety concerns with the nitration of galactose

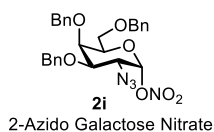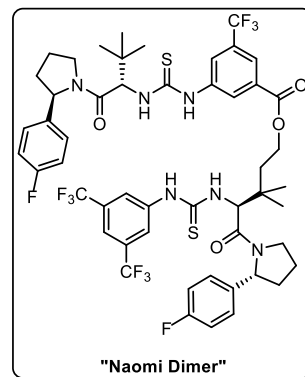

**Scheme S4.** Leaving group evaluation on galactosyl donor **2** with Galactose-Serine model system

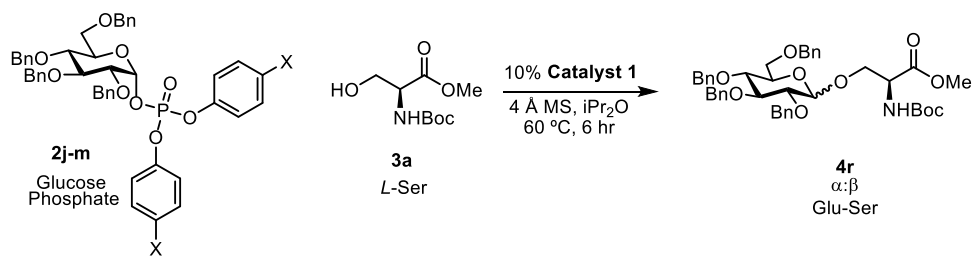

| -X                 | % Conversion | $\alpha:\beta$ |
|--------------------|--------------|----------------|
| -Cl ( <b>2j</b> )  | Not soluble  | N/A            |
| -Me ( <b>2k</b> )  | 42%          | 1:4.6          |
| -H ( <b>2l</b> )   | 61%          | 1:4.8          |
| -OMe ( <b>2m</b> ) | 47%          | 1:4.8          |

Run at 0.033 M due to low solubility of several substrates

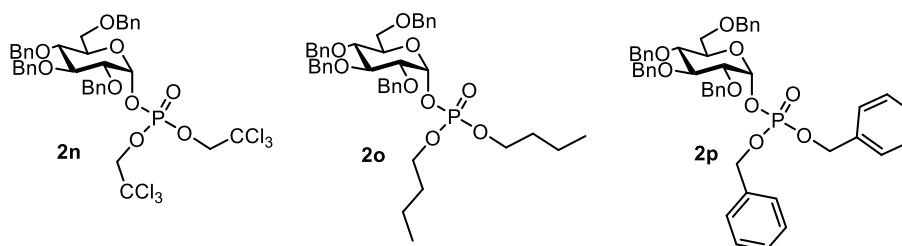

Donors give trace reactivity (<10%) after 24 hr at 23 °C in  $Et_2O$

**Scheme S5.** Phosphate leaving group optimization on glucosyl phosphate (**2j-m**)

## 6. Stereospecificity Experiment

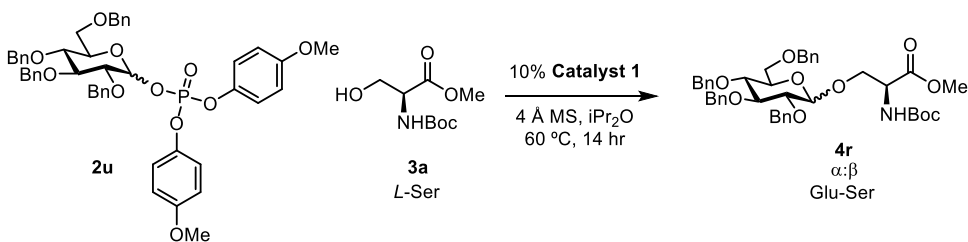

### Stereospecificity:

| <b>2u</b> ( $\alpha:\beta$ ) | % Conversion | <b>4r</b> ( $\alpha:\beta$ ) |
|------------------------------|--------------|------------------------------|
| $\alpha$ -only               | 89%          | 1:3.8                        |
| 4.3:1                        | 82%          | 1:3.8                        |

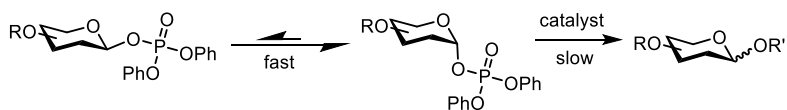

**Scheme S6.** Phosphate leaving group optimization on glucosyl phosphate (**2j**)

We observe that both anomeric mixtures of glycosyl donor and pure- $\alpha$  glycosyl phosphate donor result in the same product anomeric-selectivity. This has also been observed with 2-azido-galactosyl donor, **2e**, starting with pure- $\beta$  phosphate donor. Additionally, we observe highly- $\alpha$  enriched starting material (**2u**) after the reaction has been running for 14 hours. We do not observe decomposition of the  $\beta$ -phosphate, suggesting that anomerization of starting material to the thermodynamically favored  $\alpha$ -phosphate is fast compared to the glycosylation reaction.

While previous studies with these catalysts and glycosyl chlorides indicated a stereospecific process, the prevalence of  $\alpha$ -product from  $\alpha$ -glycosyl phosphate is not yet well understood. We and others have hypothesized that these reactions occur within the  $S_N1$ - $S_N2$  continuum, where a highly stereospecific process can arise from a loose, asynchronous- $S_N1$  mechanism. If this is the case, then  $\alpha$ -donor to  $\alpha$ -product may be possible from the formation of a (nascent) oxocarbenium species. Further mechanistic elucidation is required to more fully understand this process with glycosyl phosphates.

## 7. Optimization of Reaction Conditions

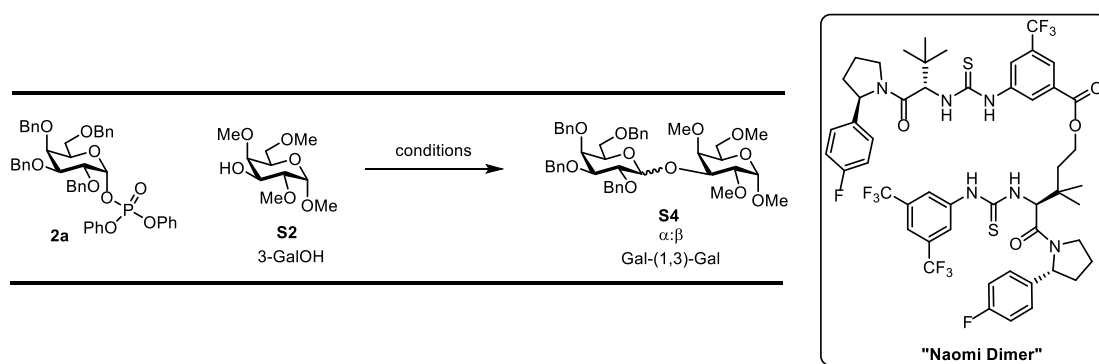

**Scheme S7.** Galactose (**2a**) and 3-GalOH (**S2**) model system used for optimization of conditions

| "Naomi Dimer" | % Conversion | % hydrolysis |
|---------------|--------------|--------------|
| N/A           | 0%           | 0%           |
| 5 mol%        | 22%          | 1%           |
| 10 mol%       | 27%          | 1%           |
| 20 mol%       | 43%          | 1%           |

4 Å MS (1.0 g/mL), 0.1 M **2a**, 0.2 M **S2** in Et<sub>2</sub>O for 5 hr at 23 °C

**Table S6.** Effect of catalyst loading in the reaction mixture

| [S2] (M) | % Conversion | % hydrolysis |
|----------|--------------|--------------|
| 0.05     | 9%           | 1%           |
| 0.10     | 15%          | 1%           |
| 0.20     | 22%          | 1%           |
| 0.40     | 14%          | 1%           |

10 mol% "Naomi Dimer", 4 Å MS (1.0 g/mL), 0.1 M **2a**, 5 hr at 23 °C

**Table S7.** Effect of acceptor (**S2**) concentration in the reaction mixture

| [2a] (M) | % Conversion | % hydrolysis |
|----------|--------------|--------------|
| 0.05     | 20%          | 2%           |
| 0.10     | 27%          | 1%           |
| 0.20     | 26%          | 2%           |
| 0.40     | 25%          | 2%           |

10 mol% "Naomi Dimer", 4 Å MS (1.0 g/mL), 0.2 M **S2** in Et<sub>2</sub>O for 5 hr at 23 °C

**Table S8.** Effect of donor (**2a**) concentration in the reaction mixture

| Temp. (°C)       | % Conversion | % hydrolysis | $\alpha:\beta$ |
|------------------|--------------|--------------|----------------|
| 23               | 27%          | 2%           | <1:20          |
| 40               | 49%          | 2%           | ~1:20          |
| 40 (no catalyst) | trace        | <1%          | 2:1**          |

10 mol% "Naomi Dimer", 4 Å MS (1.0 g/mL), 0.1 M **2a** 0.2 M **S2** in  $i$ Pr<sub>2</sub>O for 5 hr

Note: Higher temperatures resulted in lower selectivity due to increased background.

\*\*19 hours at 40 °C yields 20% conversion to  $\alpha+\beta$  mixture with 2:1  $\alpha:\beta$ .

**Table S9.** Effect of temperature

| 4 Å MS (g/mL) | % Conversion | % hydrolysis | $\alpha:\beta$  |
|---------------|--------------|--------------|-----------------|
| 0             | 45%          | 3%           | 1:5             |
| 0.5           | 18%          | 1%           | <1:20           |
| <b>1.0</b>    | <b>22%</b>   | <b>1%</b>    | <b>&lt;1:20</b> |
| 2.0           | 21%          | 1%           | <1:20           |

10 mol% "Naomi Dimer", 0.1 M **2a**, 0.2M **S2**, 5 hr at 23 °C in Et<sub>2</sub>O

**Table S10.** Effect of molecular sieves in the reaction mixture



| Solvent                 | % Conversion | % hydrolysis | $\alpha:\beta$  |
|-------------------------|--------------|--------------|-----------------|
| Dichloromethane*        | N/A          | N/A          | N/A             |
| Acetonitrile            | 12%          | 3%           | 1:1             |
| DMF                     | 19%          | 5%           | 4:1             |
| THF                     | <1%          | 1%           | N/A             |
| Toluene                 | 16%          | 1%           | ~1:20           |
| Glyme                   | N/A          | N/A          | N/A             |
| MTBE                    | 46%          | 3%           | <1:20           |
| CPME                    | 31%          | 1%           | ~1:20           |
| TBEE                    | 75%          | 1%           | <1:20           |
| <b>iPr<sub>2</sub>O</b> | <b>90%</b>   | <b>2%</b>    | <b>&lt;1:20</b> |
| Et <sub>2</sub> O       | 47%          | 2%           | <1:20           |
| Cyclohexane             | 80%          | 1%           | <1:20           |

10 mol% "Naomi Dimer", 0.1 M **2a**, 0.2M **S2**, 4 Å MS (1.0 g/mL), 4 hr at 40 °C

\* 14 hr at 23 °C. No reaction observed by NMR.

**Table S11.** Optimization of solvent

## 8. Studies with Phosphoric Acid Byproduct

| 4 Å MS   | "Naomi Dimer" | (PhO) <sub>2</sub> P(O)OH | % Conversion | % hydrolysis | α:β   |
|----------|---------------|---------------------------|--------------|--------------|-------|
| N/A      | N/A           | N/A                       | 0%           | 0%           | N/A   |
| 1.0 g/mL | N/A           | N/A                       | 0%           | 0%           | N/A   |
| N/A      | 10 mol%       | N/A                       | 45%          | 3%           | 1:5   |
| N/A      | N/A           | 50 mol%                   | 59%          | 2%           | 1:2   |
| N/A      | 10 mol%       | 50 mol%                   | 66%          | 3%           | 1:2.5 |
| 1.0 g/mL | 10 mol%       | 50 mol%                   | 26%          | 1%           | <1:20 |
| 1.0 g/mL | 10 mol%       | N/A                       | 27%          | 1%           | <1:20 |

10 mol% "Naomi Dimer", 0.05 M (PhO)<sub>2</sub>P(O)OH, 4 Å MS (1.0 g/mL), 0.1 M **2a**, 0.2 M **S2** in Et<sub>2</sub>O for 5 hr at 23 °C

**Table S12.** The effect of phosphoric acid on reactivity and selectivity with and without catalyst and molecular sieves

These results suggest that:

- 1) Phosphoric acid is a competent activator of glycosylation reactions involving phosphate leaving groups
- 2) The phosphoric acid promoted pathway is unselective and competitive with the bis-thiourea catalyzed pathway
- 3) Molecular sieves do not promote the reaction but can sequester free phosphoric acid in solution. <sup>1</sup>H NMR analysis of the crude, filtered, reaction mixtures reveal no phosphoric acid remaining in solution when molecular sieves are added. Zeolites are well known to adsorb phosphate species to their surface. Additionally, **Table S10** demonstrates the molecular sieves are saturating the solution such that increasing or decreasing the concentration of sieves (by a factor of two) does not influence reactivity or anomeric selectivity.
- 4) Bis-thiourea ("Naomi Dimer") can catalyze highly β-selective glycosylation reactions when phosphoric acid is efficiently removed from the reaction mixture.

The process of sequestering phosphoric acid with molecular sieves has been found to depend on solvent. Specifically, reactions conducted in dichloromethane were found to contain substantial quantities of phosphoric acid with and without the addition of molecular sieves, resulting in drastically reduced β-selectivity.

Additional kinetic studies have shown that selectivity is constant over the course of the reaction when sieves and bis-thiourea catalyst are used together (under optimized reaction conditions).

## 9. Inhibition Studies with Glycosyl Chlorides and Macrocyclic Bis-Thiourea Catalyst

### 9.1 Competition Experiment and Data Analysis

#### Methanolysis of Mannosyl Chloride

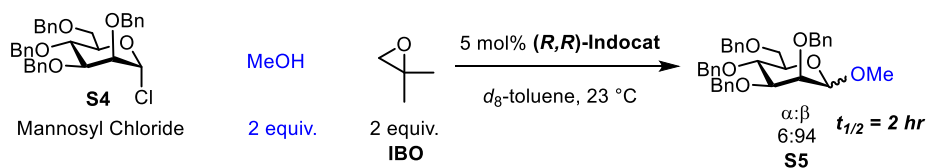

#### Man-(1,3)-Gal Coupling

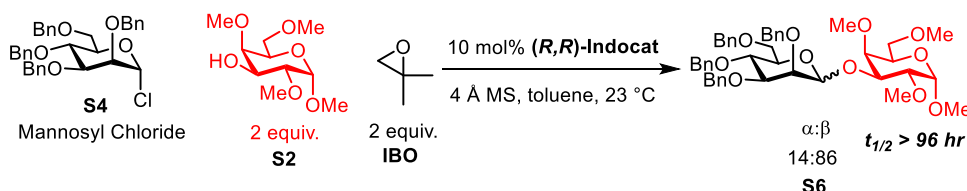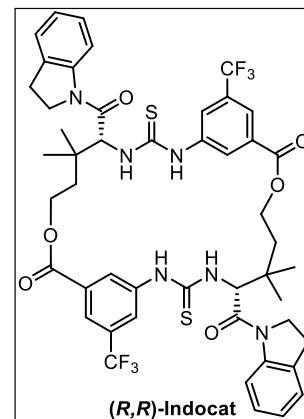

**Scheme S8.** Glycosylation of Mannosyl chloride prohibitively slow with glycosyl acceptors

In our previously published system with glycosyl chlorides and the catalyst, **Indocat**, we were unable to extend our glycosylation method beyond simple alcohol acceptors. While simple glycosyl acceptors were possible, reduced rates and selectivity were observed.

One example of this limitation is shown in **Scheme S8**. Based on the results summarized above, we hypothesized that rate reduction with **S2** could be due to inhibition of the catalyst by the glycosyl acceptor. To more rigorously test this hypothesis, a competition experiment was conducted between **S2** and methanol. Since the half-life of the methanol reaction with mannosyl chloride (**S4**) was fast on the timescale of the 3-galactose (**S2**) coupling, we would expect to see only methanolysis.

#### Competition Experiment

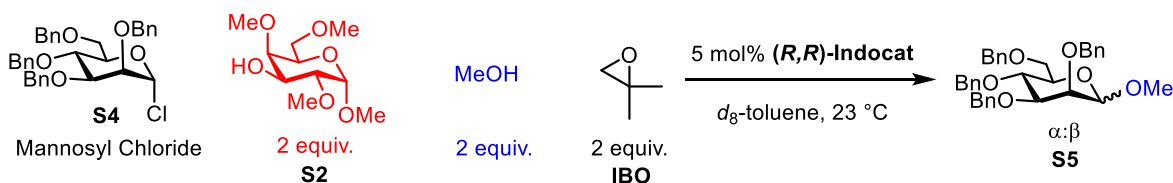

**Scheme S9.** Competition experiment between methanol and galactose (**S2**) with mannosyl chloride donor (**S4**)

Three experiments were run to test if **S2** inhibits **(R,R) Indocat**.

- 1) The first was reacting **S4** with two-equivalents of methanol, which constitutes the standard reaction conditions.
- 2) The second experiment used two equivalents of methanol and two equivalents of **S2**.

- 3) The third experiment reacted four equivalents of methanol with **S4**, to test the effect of doubling the total alcohol concentration in solution.

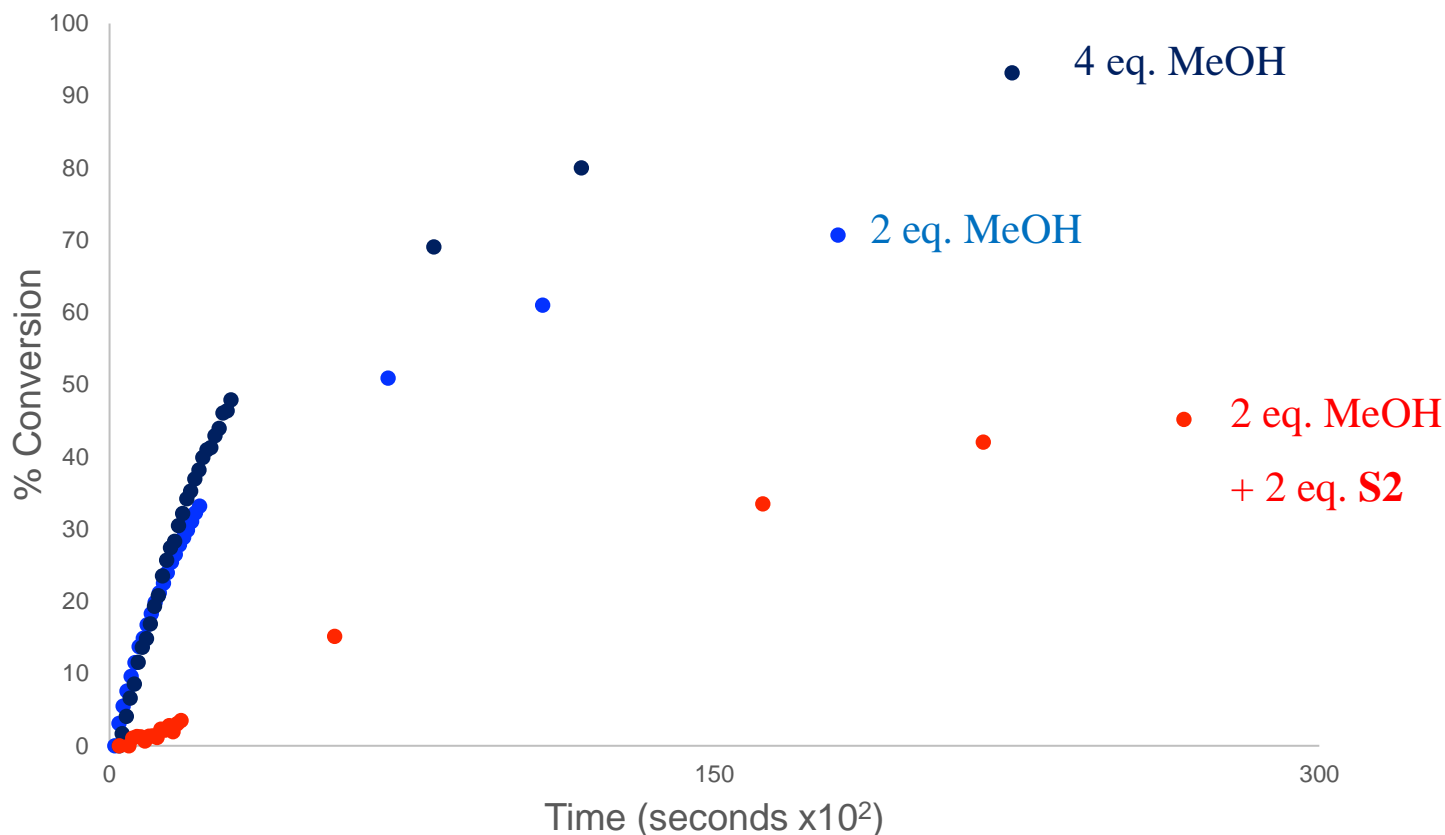

**Figure S5.** Competition experiment between methanol and galactose (**S2**) with mannosyl chloride donor (**S4**)

The results of the competition experiment clearly demonstrate that **S2** inhibits the catalyst, (*R,R*) Indocat (red points in Figure S5). Using the first 5% conversion measured, the rate is 7.6x slower when **S2** is added to the methanolysis reaction. Additionally, this is not due to the presence of four equivalents of total alcohol in solution since four equivalents of methanol increase the reaction rate (black points in Figure S5).

## 9.2 Experimental Details for Competition Experiment

### Exp. 1: 2 equiv. MeOH

To a dry J. Young NMR tube was added (*R,R*)-Indocat (2.5mg, 0.05  $\mu\text{mol}$ , 5 mol%), 500  $\mu\text{L}$  *d*<sub>8</sub>-toluene, and 4  $\mu\text{L}$  MeOH (2.0 eq., 0.10 mmol, sure/seal, Aldrich). The mixture was shaken until homogeneous and 10  $\mu\text{L}$  isobutylene oxide (IBO, 2.3 eq., 0.11 mmol) and 2.5  $\mu\text{L}$  mesitylene (0.36 eq., 0.02 mmol, internal standard) were added. To the side of the NMR tube (such that it did not contact the solution at the bottom of the tube) was added 28 mg mannosyl chloride, **S4** (1.0 eq., 0.05 mmol). The tube was subsequently shaken, and the time was noted. NMR array collection was initiated with 25 sec. delay and single scan for each point.

### Exp. 2: 4 equiv. MeOH

To a dry J. Young NMR tube was added (*R,R*)-Indocat (2.5mg, 0.05  $\mu$ mol, 5 mol%), 500  $\mu$ L *d*<sub>8</sub>-toluene, and 8  $\mu$ L MeOH (4.0 eq., 0.20 mmol, sure/seal, Aldrich). The mixture was shaken until homogeneous and 10  $\mu$ L isobutylene oxide (IBO, 2.3 eq., 0.11 mmol) and 2.5  $\mu$ L mesitylene (0.36 eq., 0.02 mmol, internal standard) were added. To the side of the NMR tube (such that it did not contact the solution at the bottom of the tube) was added 28 mg mannosyl chloride, **S4** (1.0 eq., 0.05 mmol). The tube was subsequently shaken and the time was noted. NMR array collection was initiated with 25 sec. delay and single scan for each point.

**Exp. 3:** 2 equiv. MeOH + 2 equiv. 3OH-MeGal (**S2**)

(*R,R*)-Indocat (2.5mg, 0.05  $\mu$ mol, 5 mol%) and 3OH-MeGal, **S2**, (2 equiv., 24 mg, 0.10 mmol) were mixed and concentrated 3X with benzene and put on high-vacuum overnight. To this mixture was added 500  $\mu$ L *d*<sub>8</sub>-toluene and the mixture was transferred to a dry J. Young NMR tube. Next, 4  $\mu$ L MeOH (2.0 eq., 0.10 mmol, sure/seal, Aldrich) was added and the mixture was shaken until homogeneous, followed by 10  $\mu$ L isobutylene oxide (IBO, 2.3 eq., 0.11 mmol) and 2.5  $\mu$ L mesitylene (0.36 eq., 0.02 mmol, internal standard). To the side of the NMR tube (such that it did not contact the solution at the bottom of the tube) was added 28 mg mannosyl chloride, **S4** (1.0 eq., 0.05 mmol). The tube was subsequently shaken and the time was noted. NMR array collection was initiated with 25 sec. delay and single scan for each point.

**Data analysis:**

The arrayed data as well as the subsequent individual time points taken were baseline corrected and analyzed by integration of mesitylene internal standard to the disappearance of the mannosyl chloride (**S4**) anomeric proton. Appearance of the  $\beta$ -OMe mannose product was also tracked and corresponds to disappearance of mannosyl chloride starting material. Conversion for the graph below was calculated by setting the first spectrum taken equal to 0% conversion. The first spectrum was typically taken 2-4 minutes from the start of the reaction. On the time scale of the reaction ( $t_{1/2}$  of  $\sim$ 2 hr), this conversion is small (<10%).

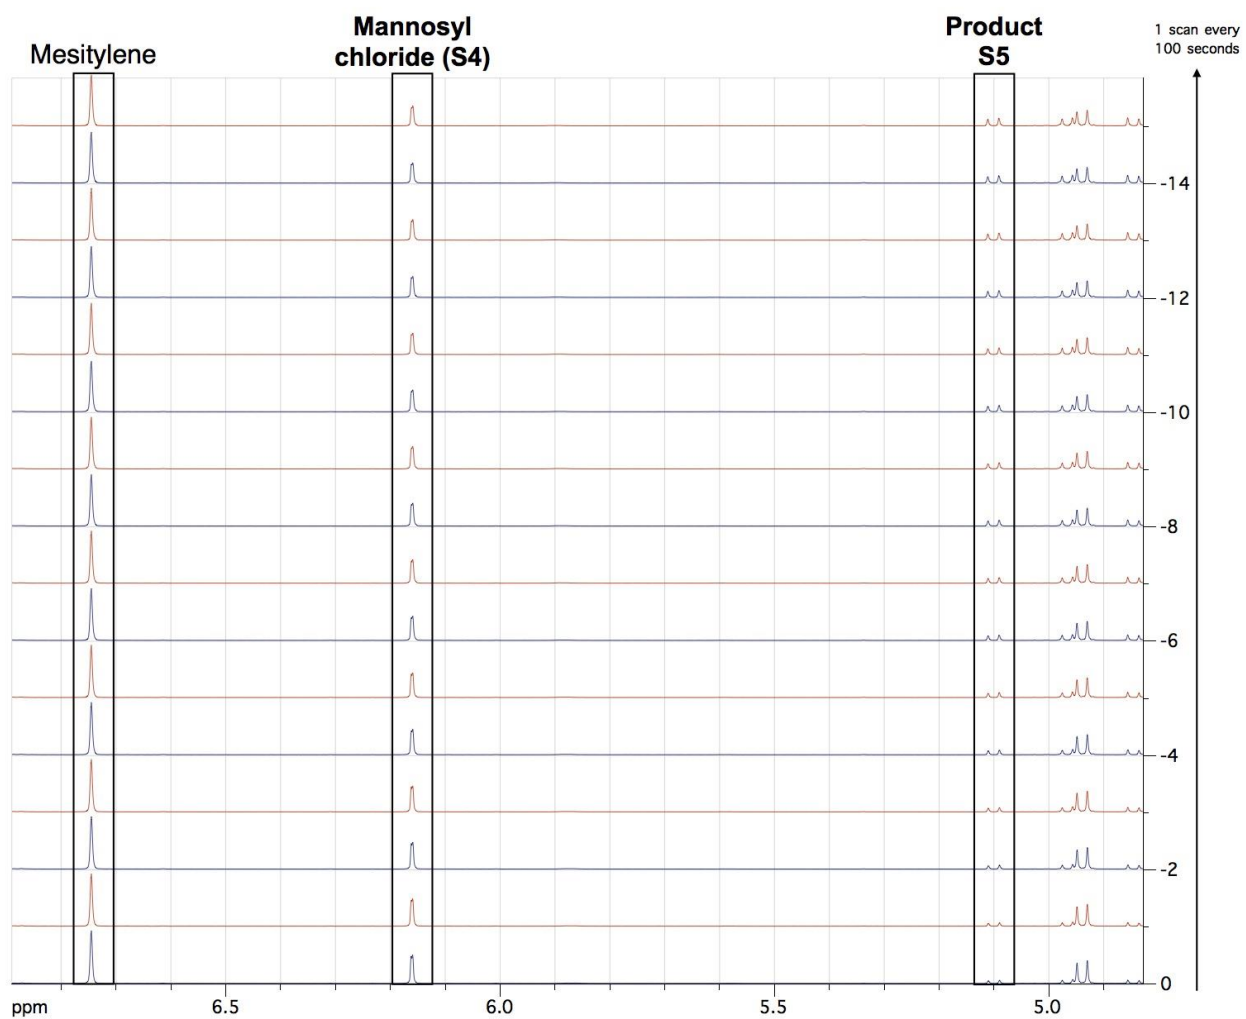

**Figure S6.** Typical <sup>1</sup>H NMR array used for kinetic data analysis

## 10. Kinetic Analyses of Galactosyl Phosphate (2a) and Galactosyl Chloride (2b)

### 10.1 . Preparation of Materials for Kinetic Experiments

*Note: all stock solutions were prepared using volumetric flasks at 23 °C.*

28 mg of catalyst **1** and 15  $\mu$ L of dibenzyl ether (internal standard for HPLC) were added to an oven-dry 1 mL volumetric flask with diisopropyl ether (sure/seal, Aldrich) to generate a solution 0.025 M in catalyst **1** and 0.079 M in dibenzyl ether. It was necessary to store this solution at -80 °C to prevent crystallization of the catalyst, which occurs over several days at room temperature.

A 3 M stock solution of (*L*)-Boc-Ser-OMe (**3a**) was prepared and diluted to the desired concentration for each run and stored at 23°C.

Two stock solutions of galactosyl phosphate (**2a**) in diisopropyl ether were prepared (0.167 M and 0.333 M) and stored at -80°C. Under these conditions, the substrate crystallizes (see X-ray structure section). For each use, the mixture was slowly warmed to room temperature (23 °C) and heated in an oil bath at 40 °C until homogeneous. This mixture was then diluted to the desired concentration for each run.

Two stock solutions of galactosyl chloride (**2b**) in diisopropyl ether were prepared (0.167 M and 0.333 M) and stored at -80 °C. For each use, the mixture was slowly warmed to room temperature (23 °C). This mixture was then diluted to the desired concentration for each run.

A stock solution of galactosyl chloride (**2b**) and galactosyl phosphate (**2a**) in diisopropyl ether was prepared (0.167 M in each glycosyl donor) and stored at -80 °C. For each use, the mixture was slowly warmed to room temperature (23 °C). This mixture was then diluted to the desired concentration for each run.

### 10.2 . General Procedure for Kinetic Experiments

To a 0.5 dram vial with stir bar and PTFE cap was charged with 4 Å MS (1 mg/10  $\mu$ L solvent), glycosyl donor solution, (*L*)-Boc-Ser-OMe (**3a**) solution. This solution was stirred at 40 °C for 5 minutes to equilibrate temperature followed by injection of catalyst/internal standard stock solution and the time was noted.

### 10.3 General Procedure for Sample Collection and HPLC Analysis

The PTFE cap of the 0.5 dram vial stirring at 40°C was punctured with a 25  $\mu$ L glass syringe and 10  $\mu$ L of solution was removed and immediately injected into a new 0.5 dram vial with 500  $\mu$ L 5% iPrOH/Hexanes. This process efficiently stops the reaction as determined by HPLC analysis the same day and three days after sample collection with no change in product formation. This mixture is pushed through a syringe filter into an HPLC sample vial and capped.

Using 5% iPrOH/Hexanes mobile phase and an AD-H chiral HPLC column, the samples were run for 25 minutes. The  $\beta$ - product was measured relative to the internal standard.

#### 10.4 Reaction Time-Course with Galactosyl Phosphate (2a) and L-Ser (3a)

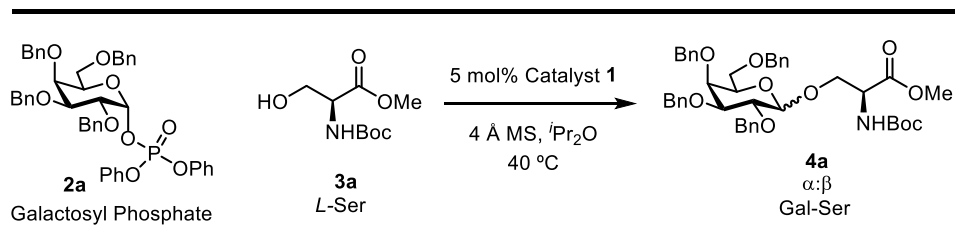

**Scheme S10.** Galactosyl phosphate and L-Serine model system used for kinetic evaluation

A 0.5 dram vial with stir bar and PTFE cap was charged with galactosyl phosphate (**2a**) (0.1 M, 0.05 mmol), (L)-BocSerOMe (**3a**) (0.2 M, 0.10 mmol), 4 Å MS (50 mg). This 400  $\mu$ L solution was stirred at 40 °C for 5 minutes to equilibrate temperature followed by injection of catalyst/internal standard stock solution (100  $\mu$ L) and the time was noted.

HPLC samples were collected according to the above general procedure and analyzed at 254 nm. As shown below, internal standard elutes at 4.3 minutes and product elutes at 20 minutes. The Product/Internal standard ratio was normalized to 95% conversion at 6 hours based on ReactIR and NMR data collected on a larger scale (0.15 mmol) of the same reaction. Since the conversion to product is equal to yield (based on isolated yields during scale-up), the concentration of starting glycosyl donor was determined by subtracting product concentration.

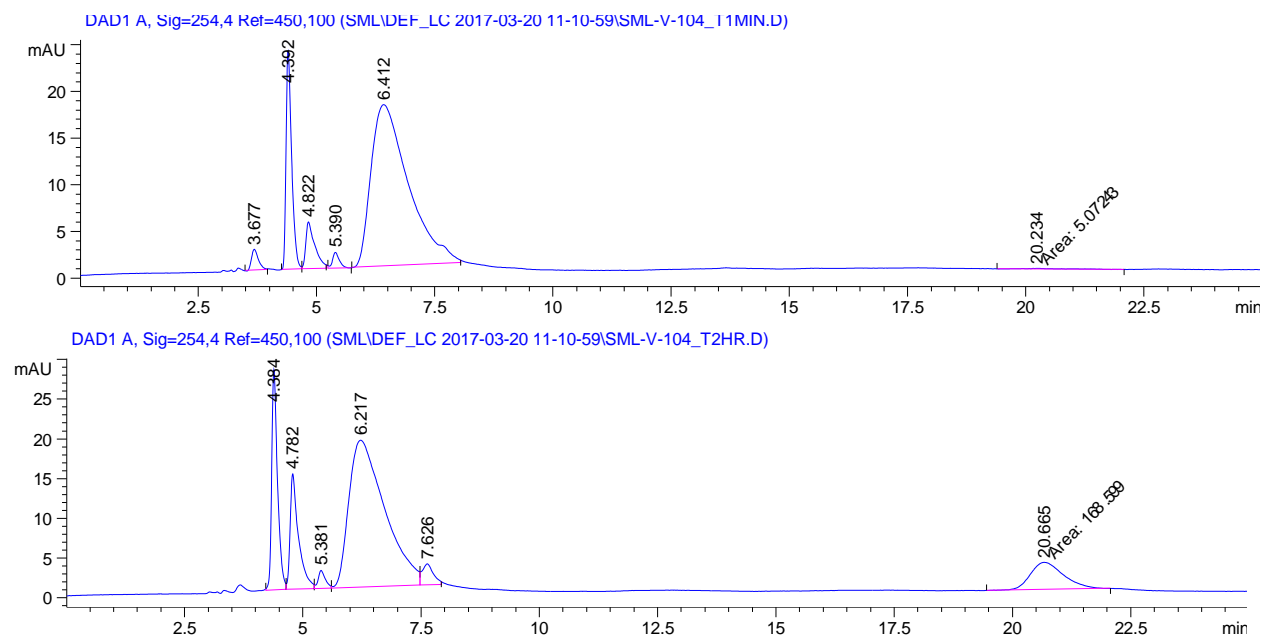



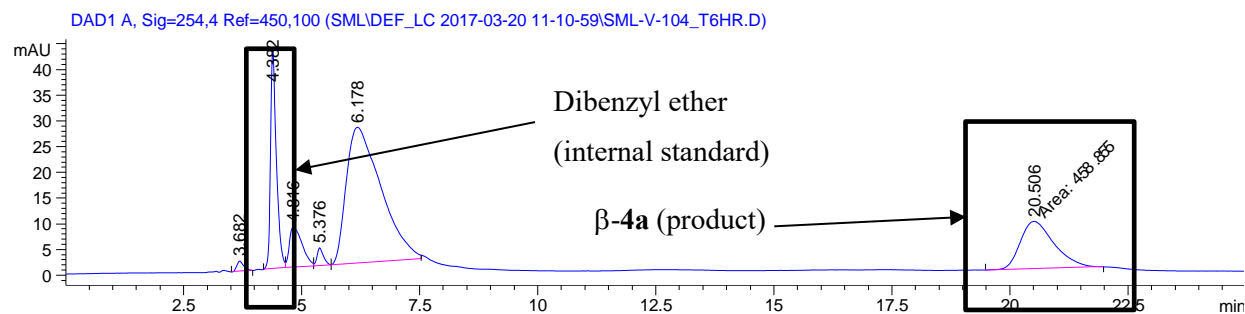

Figure S7. HPLC trace used for kinetic data analysis

| Time (hours) | Internal standard<br>(IS) | 4a<br>(mAU) | 4a:IS        | [2a] (M)     |
|--------------|---------------------------|-------------|--------------|--------------|
| 0.02         | 194                       | N/A         | 0.000        | 0.100        |
| 0.03         | 196                       | N/A         | 0.000        | 0.100        |
| 0.07         | 260                       | 6           | 0.023        | 0.098        |
| 0.10         | 233                       | 9           | 0.039        | 0.097        |
| 0.13         | 197                       | 9           | 0.046        | 0.097        |
| 0.17         | 192                       | 12          | 0.063        | 0.095        |
| 0.20         | 192                       | 17          | 0.089        | 0.093        |
| 0.23         | 213                       | 17          | 0.080        | 0.094        |
| 0.27         | 190                       | 20          | 0.105        | 0.092        |
| 0.30         | 231                       | 29          | 0.126        | 0.090        |
| 0.33         | 217                       | 30          | 0.138        | 0.089        |
| 0.50         | 267                       | 53          | 0.199        | 0.085        |
| 0.67         | 253                       | 67          | 0.265        | 0.080        |
| 0.83         | 310                       | 103         | 0.332        | 0.075        |
| 1.00         | 296                       | 115         | 0.389        | 0.070        |
| 2.00         | 238                       | 169         | 0.710        | 0.046        |
| 3.00         | 279                       | 260         | 0.932        | 0.029        |
| 4.00         | 278                       | 296         | 1.065        | 0.019        |
| 5.00         | 293                       | 348         | 1.188        | 0.010        |
| <b>6.00</b>  | <b>368</b>                | <b>459</b>  | <b>1.247</b> | <b>0.005</b> |
| 7.00         | 521                       | 669         | 1.284        | 0.002        |

Table S13. Raw data from HPLC analysis of reaction between galactosyl phosphate (2a) and *L*-Ser (3a) over 7 hours.

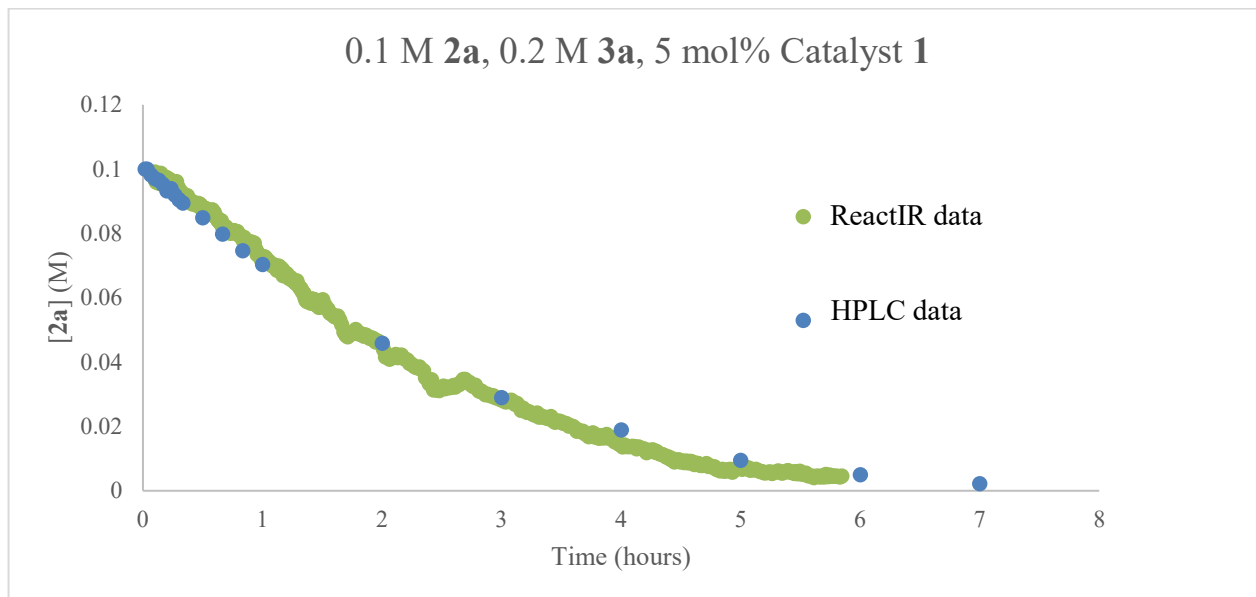

**Figure S8.** Concentration of galactosyl phosphate (**2a**) versus time in the model coupling reaction with and *L*-Ser (**3a**). HPLC and ReactIR data are overlaid. ReactIR data was obtained using the same general procedure at 0.15 mmol scale.

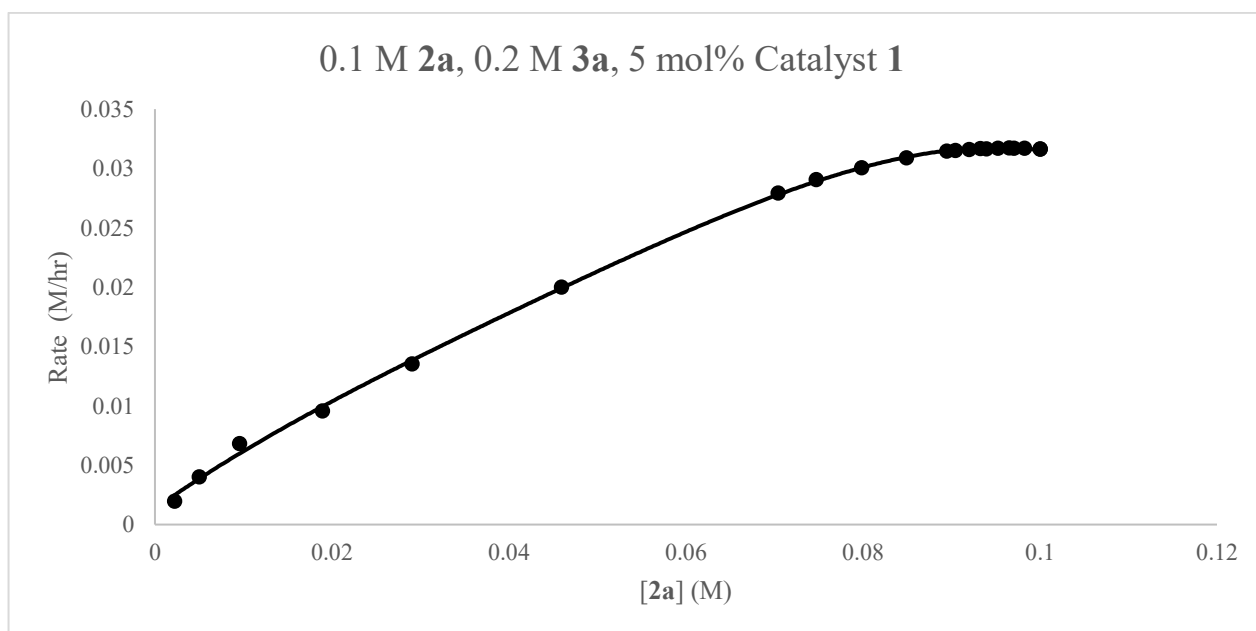

**Figure S9.** Rate of **3a** consumption as a function of  $[2a]$  (M) determined by HPLC. 6<sup>th</sup>-order polynomial was fit to concentration versus time plot and the derivative was used for the above plot.

### 10.5 Michaelis-Menten kinetic analysis with galactosyl phosphate (**2a**) and *L*-Ser (**3a**)

The general procedure described in section 10.2 was followed to setup each sample. Saturation kinetics were done with *L*-Ser (**3a**), keeping galactosyl phosphate (**2a**) concentration fixed at 0.1 M and catalyst **1** at 5 mol% (0.005 M).

| 2a (equiv.) | 3a (equiv.) | Hours | Rate (M/hr) |
|-------------|-------------|-------|-------------|
| 1.0         | 0.00        | 0.17  | 0.000       |
| 1.0         | 0.00        | 0.33  | 0.000       |
| 1.0         | 0.00        | 0.00  | 0.000       |
| 1.0         | 0.25        | 0.17  | 0.011       |
| 1.0         | 0.25        | 0.33  | 0.009       |
| 1.0         | 0.25        | 0.00  | 0.000       |
| 1.0         | 0.25        | 0.50  | 0.009       |
| 1.0         | 0.50        | 0.17  | 0.019       |
| 1.0         | 0.50        | 0.33  | 0.017       |
| 1.0         | 0.50        | 0.00  | 0.000       |
| 1.0         | 0.50        | 0.50  | 0.016       |
| 1.0         | 0.75        | 0.17  | 0.024       |
| 1.0         | 0.75        | 0.33  | 0.024       |
| 1.0         | 0.75        | 0.00  | 0.000       |
| 1.0         | 0.75        | 0.67  | 0.018       |
| 1.0         | 1.00        | 0.17  | 0.025       |
| 1.0         | 1.00        | 0.33  | 0.025       |
| 1.0         | 1.00        | 0.00  | 0.000       |
| 1.0         | 1.00        | 0.67  | 0.021       |
| 1.0         | 1.50        | 0.17  | 0.032       |
| 1.0         | 1.50        | 0.33  | 0.030       |
| 1.0         | 1.50        | 0.00  | 0.000       |
| 1.0         | 1.50        | 0.67  | 0.025       |
| 1.0         | 2.00        | 0.17  | 0.032       |
| 1.0         | 2.00        | 0.33  | 0.029       |
| 1.0         | 2.00        | 0.00  | 0.000       |
| 1.0         | 2.00        | 0.67  | 0.023       |

**Table S14.** HPLC data for reaction between galactosyl phosphate (**2a**) and *L*-Ser (**3a**), changing concentration in *L*-Ser (**3a**)

**Data Analysis:** For *L*-Ser (**3a**) at or below 0.50 equivalents, time points were taken at 10, 20, and 30 minutes. For 0.75 equivalents and above, time points were taken at 10, 20, and 40 minutes. For each time point, an initial rate was determined by dividing the product concentration by the time it was taken to generate a M/hr, which was used to fit the saturation curve using the Michaelis-Menten 1-dimensional equation (1).

$$rate = \frac{V_{max}[S]}{K_m + [S]} \quad (1)$$

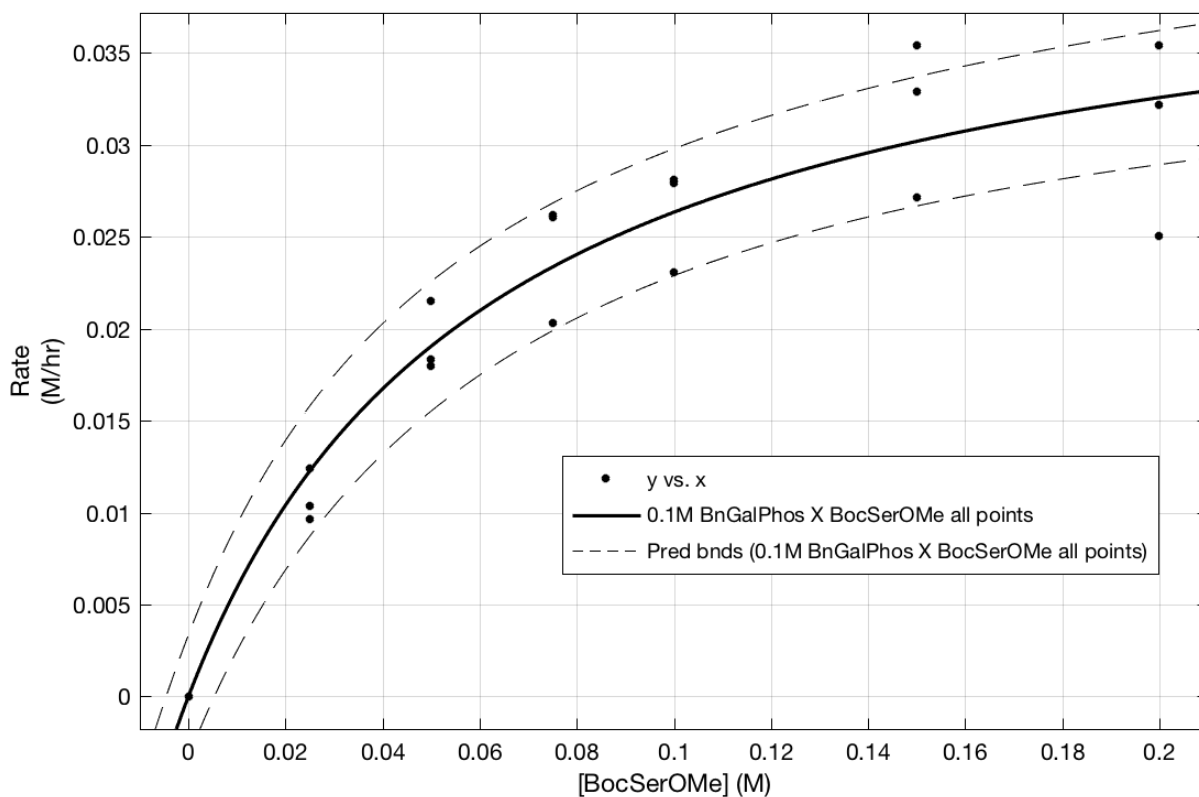

**Figure S10.** HPLC Saturation curve fit to the Michaelis-Menten equation (1) for **changing [L-Ser] (3a)** with 95% confidence bounds

General model:

$$f(x) = V_{\max} * x / (K_m + x)$$

Coefficients (with 95% confidence bounds):

$$K_m = 0.06204 (0.04626, 0.07782)$$

$$V_{\max} = 0.04266 (0.03854, 0.04679)$$

Goodness of fit:

SSE: 0.0001676

R-square: 0.9799

Adjusted R-square: 0.9796

RMSE: 0.001671

Saturation kinetics were done with **galactosyl phosphate (2a)**, keeping *L*-Ser (**3a**) concentration fixed at 0.2 M and catalyst **1** at 5 mol% (0.005 M).

| <b>2a</b> (equiv.) | <b>3a</b> (equiv.) | Hours       | Rate (M/hr)      |
|--------------------|--------------------|-------------|------------------|
| 0.000              | 2.00               | 0.17        | 0.000            |
| 0.000              | 2.00               | 0.33        | 0.000            |
| 0.000              | 2.00               | 0.00        | 0.000            |
| 0.125              | 2.00               | 0.17        | 0.013            |
| 0.125              | 2.00               | 0.33        | 0.010            |
| 0.125              | 2.00               | 0.00        | 0.000            |
| 0.125              | 2.00               | 0.50        | 0.009            |
| 0.250              | 2.00               | 0.17        | 0.021            |
| 0.250              | 2.00               | 0.33        | 0.018            |
| 0.250              | 2.00               | 0.00        | 0.000            |
| 0.250              | 2.00               | 0.50        | 0.016            |
| 0.500              | 2.00               | 0.17        | 0.029            |
| 0.500              | 2.00               | 0.33        | 0.025            |
| 0.500              | 2.00               | 0.00        | 0.0              |
| 0.500              | 2.00               | 0.50        | 0.023            |
| 0.750              | 2.00               | 0.17        | 0.031            |
| 0.750              | 2.00               | 0.33        | 0.025            |
| 0.750              | 2.00               | 0.00        | 0.0              |
| <b>0.750</b>       | <b>2.00</b>        | <b>0.67</b> | <b>0.016 (X)</b> |

**Table S15-a.** HPLC data for reaction between galactosyl phosphate (**2a**) and *L*-Ser (**3a**), changing concentration in galactosyl phosphate (**2a**) from 0.125 M to 0.750 M

| <b>2a</b> (equiv.) | <b>3a</b> (equiv.) | Hours | Rate (M/hr) |
|--------------------|--------------------|-------|-------------|
| 0.0                | 2.0                | 0.67  | 0.000       |
| 0.5                | 2.0                | 0.67  | 0.029       |
| 1.0                | 2.0                | 0.67  | 0.032       |
| 1.5                | 2.0                | 0.67  | 0.032       |
| 2.0                | 2.0                | 0.67  | 0.035       |

**Table S15-b.** HPLC data for reaction between galactosyl phosphate (**2a**) and *L*-Ser (**3a**), changing concentration in galactosyl phosphate (**2a**) from 0.50 M to 2.00 M

At concentrations above 1.0 equiv galactosyl phosphate (**2a**) (>0.1 M), a separate series of runs were performed using a single time point at 20 minutes using a more concentrated stock solution of glycosyl donor. This was included with the 0-0.75 equiv. series of data.

For 0.75 equiv. galactosyl phosphate (**2a**), the 40-minute time point was discarded from analysis since the initial rate region had passed and deviation from linearity was high (not indicative of initial rate region). Since the initial rate at 20 minutes had been determined previously by NMR, HPLC, and ReactIR, the absolute rate was set at 32 mM/hr at standard conditions (0.2 M **3a**, 0.1 M **2a**, and 0.025 M catalyst **1**).

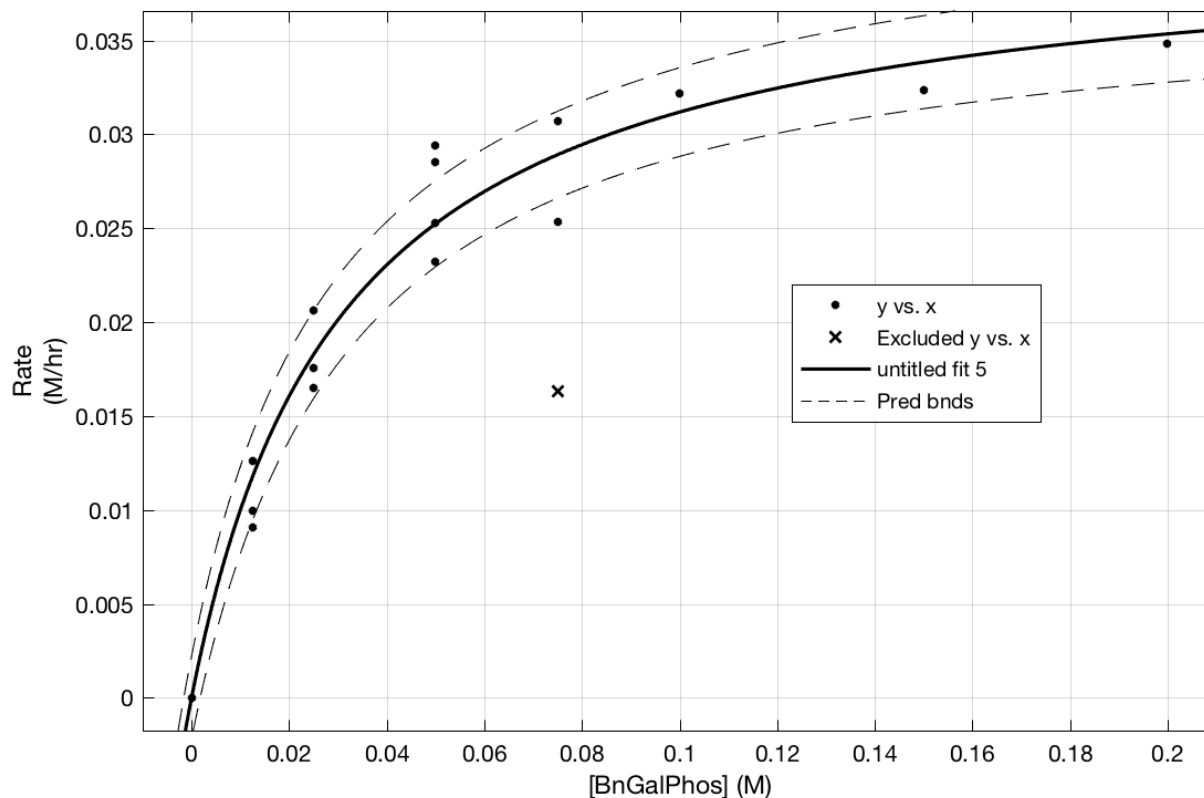

**Figure S11.** HPLC Saturation curve fit to the Michaelis-Menten equation for **changing [2a] (galactosyl phosphate)** with 95% confidence bounds

General model:

$$f(x) = V_{\max} * x / (K_m + x)$$

Coefficients (with 95% confidence bounds):

$$K_m = 0.03081 (0.02605, 0.03556)$$

$$V_{\max} = 0.04079 (0.03855, 0.04302)$$

Goodness of fit:

SSE: 7.182e-05

R-square: 0.9899

Adjusted R-square: 0.9897

RMSE: 0.001103

*Note: The data in **Figure 2D** of the main text show the calculated initial rate for each point by fitting a line and plotting the slope (initial rate) versus concentration, rather than three independent initial rates as shown above. The numbers presented reflect the full dataset as described here.*

## 8.6 Reaction Time-Course with Galactosyl Chloride (**2b**) and *L*-Ser (**3a**)

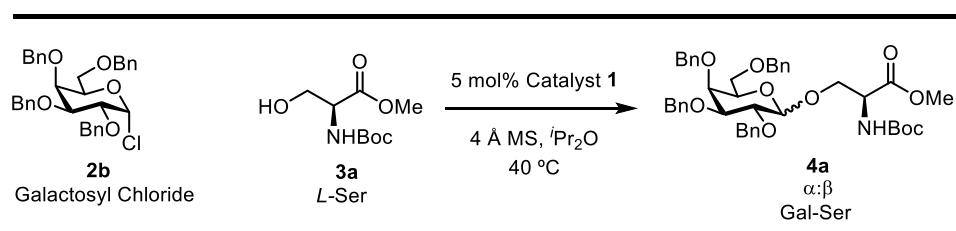

**Scheme S11.** Galactosyl chloride (**2b**) and *L*-Serine (**3a**) model system used for kinetic evaluation

The same general procedure for the above glycosyl phosphate kinetics (Section 8.4) were followed for the glycosyl chloride (**2b**), using the same catalyst (**1**) and *L*-Serine (**3a**) stock solutions. Given the slow hydrolysis of glycosyl chloride in isopropyl alcohol and the well resolved **2b** peak by HPLC, the concentration was calculated by using product divided by the sum of product and starting material. The data using the same method as for the phosphate reaction profile yielded noisier data, both with similar initial rates. Both analyses of the data are shown below.

| Time (hours) | [ <b>2b</b> ] (M) | IS (mAU) | <b>4a</b> (mAU) | <b>4a</b> :IS | <b>2b</b> (mAU) |
|--------------|-------------------|----------|-----------------|---------------|-----------------|
| 0            | 0.100             | 194      | 0               | 0.000         | 0               |
| 0.5          | 0.095             | 117      | 15              | 0.128         | 642             |
| 1            | 0.092             | 153      | 32              | 0.209         | 624             |
| 1.5          | 0.089             | 183      | 49              | 0.268         | 604             |
| 2            | 0.083             | 161      | 69              | 0.429         | 634             |
| 3.2          | 0.072             | 137      | 95              | 0.693         | 560             |
| 4.1          | 0.079             | 230      | 122             | 0.530         | 538             |
| 5.1          | 0.066             | 202      | 172             | 0.851         | 587             |
| 6.4          | 0.057             | 185      | 200             | 1.081         | 527             |
| 7.4          | 0.070             | 284      | 210             | 0.739         | 482             |
| 8.5          | 0.057             | 238      | 253             | 1.063         | 491             |

**Table S16.** Raw data from HPLC analysis of reaction between galactosyl chloride (**2b**) and *L*-Ser (**3a**) over 8.5 hours.



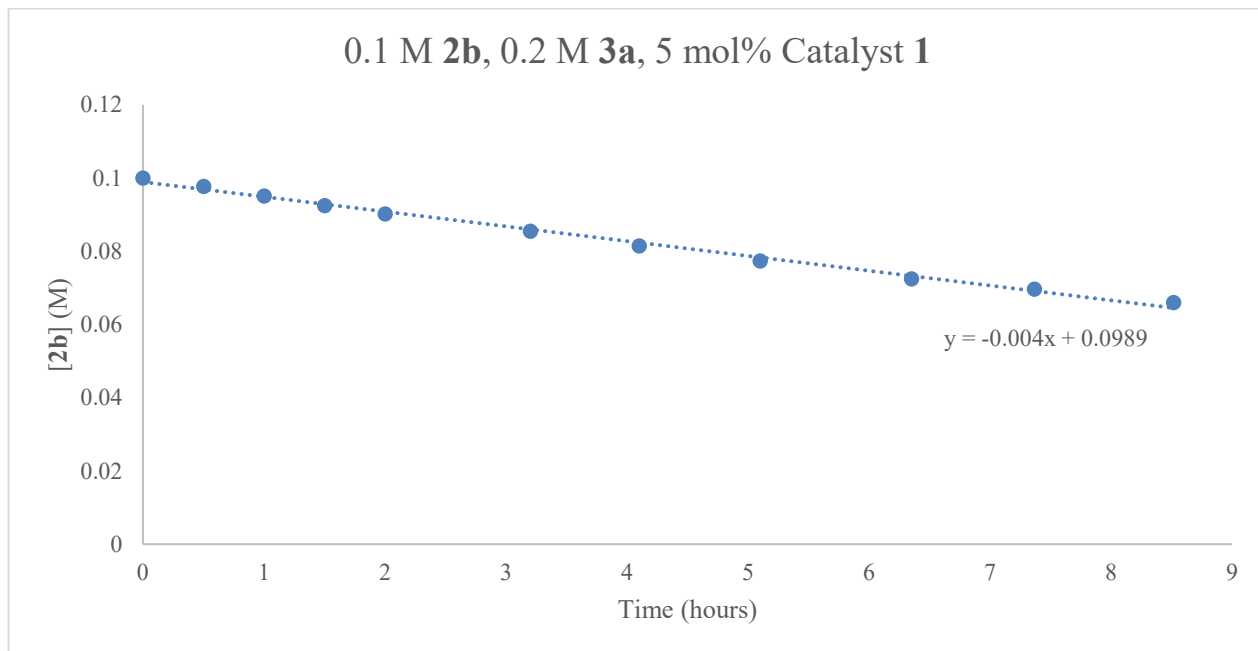

**Figure S12-a.** HPLC data for reaction between galactosyl chloride (**2b**) and *L*-Ser (**3a**).

*Note:* The above plot used the ratio of  $4a/(4a + 2b)$  to determine concentration of **2b**.

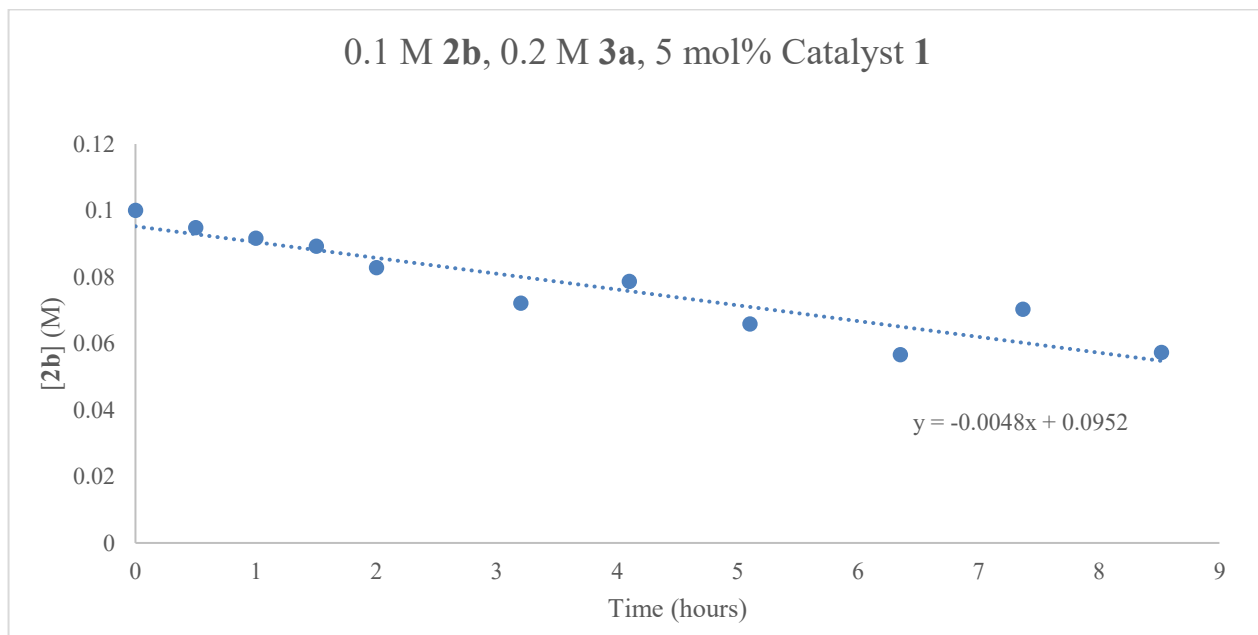

**Figure S12-b.** HPLC data for reaction between galactosyl chloride (**2b**) and *L*-Ser (**3a**). The above plot measured concentration relative to internal standard (dibenzyl ether).

The initial rate of the phosphate reaction suggests 6- to 8-fold faster reactivity compared to the chloride.

## 10.7 Michaelis-Menten Kinetic Analysis with Galactosyl Chloride (2b) and L-Ser (3a)

Using the general procedure outlined above to setup each sample.

Saturation kinetics were done with *L*-Ser (3a), keeping galactosyl chloride (2b) concentration fixed at 0.1 M and catalyst **1** at 5 mol% (0.005M).

| [2b] (M) | [3a] (M) | Time (hr) | Rate (M/hr) |
|----------|----------|-----------|-------------|
| 0.100    | 0.025    | 1         | 0.0021      |
| 0.100    | 0.025    | 2         | 0.0021      |
| 0.100    | 0.025    | 3         | 0.0013      |
| 0.100    | 0.05     | 0.5       | 0.0027      |
| 0.100    | 0.05     | 1         | 0.0029      |
| 0.100    | 0.05     | 2         | 0.0036      |
| 0.100    | 0.05     | 3         | 0.0019      |
| 0.100    | 0.075    | 0.5       | 0.0030      |
| 0.100    | 0.075    | 1         | 0.0040      |
| 0.100    | 0.075    | 2         | 0.0046      |
| 0.100    | 0.075    | 3         | 0.0023      |
| 0.100    | 0.1      | 0.5       | 0.0043      |
| 0.100    | 0.1      | 1         | 0.0044      |
| 0.100    | 0.1      | 2         | 0.0041      |
| 0.100    | 0.1      | 3         | 0.0040      |
| 0.100    | 0.125    | 0.5       | 0.0050      |
| 0.100    | 0.125    | 1         | 0.0042      |
| 0.100    | 0.125    | 2         | 0.0041      |
| 0.100    | 0.125    | 3         | 0.0041      |
| 0.100    | 0.15     | 0.5       | 0.0042      |
| 0.100    | 0.15     | 1         | 0.0041      |
| 0.100    | 0.15     | 2         | 0.0045      |
| 0.100    | 0.15     | 3         | 0.0043      |
| 0.100    | 0.175    | 0.5       | 0.0043      |
| 0.100    | 0.175    | 1         | 0.0042      |
| 0.100    | 0.175    | 2         | 0.0043      |
| 0.100    | 0.175    | 3         | 0.0040      |
| 0.100    | 0.2      | 0.5       | 0.0047      |

|       |      |     |        |
|-------|------|-----|--------|
| 0.100 | 0.2  | 1   | 0.0042 |
| 0.100 | 0.2  | 2   | 0.0047 |
| 0.100 | 0.2  | 3   | 0.0045 |
| 0.100 | 0.25 | 0.5 | 0.0058 |
| 0.100 | 0.25 | 1   | 0.0042 |
| 0.100 | 0.25 | 2   | 0.0046 |
| 0.100 | 0.3  | 0.5 | 0.0044 |
| 0.100 | 0.3  | 1   | 0.0043 |
| 0.100 | 0.3  | 2   | 0.0045 |
| 0.100 | 0.35 | 0.5 | 0.0043 |
| 0.100 | 0.35 | 1   | 0.0045 |
| 0.100 | 0.35 | 2   | 0.0045 |
| 0.100 | 0.35 | 3   | 0.0040 |
| 0.100 | 0.4  | 0.5 | 0.0039 |
| 0.100 | 0.4  | 1   | 0.0045 |
| 0.100 | 0.4  | 2   | 0.0042 |
| 0.100 | 0.4  | 3   | 0.0037 |

**Table S17.** HPLC data for reaction between galactosyl chloride (**2b**) and *L*-Ser (**3a**), changing concentration in *L*-Ser (**3a**)

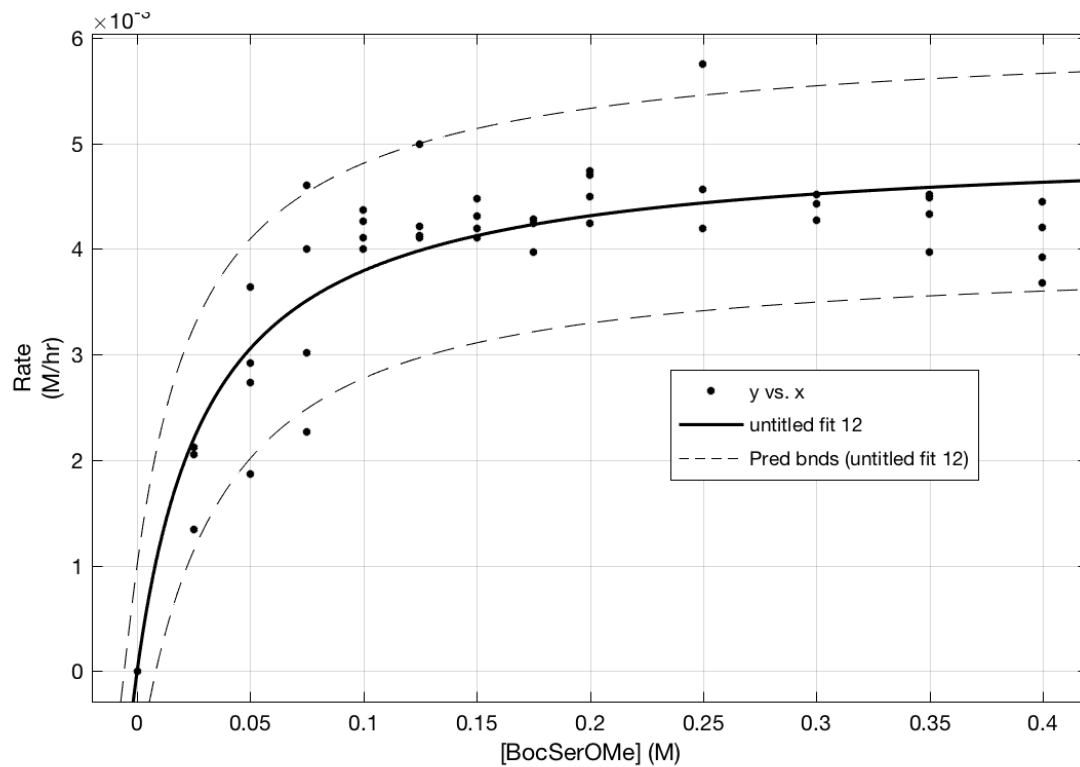

**Figure S13.** HPLC Saturation curve fit to the Michaelis-Menten equation for **changing [L-Ser] (3a)** with 95% confidence bounds

General model:

$$f(x) = V_{\max} \cdot x / (K_m + x)$$

Coefficients (with 95% confidence bounds):

$$K_m = 0.03181 \quad (0.01994, 0.04369)$$

$$V_{\max} = 0.005 \quad (0.004633, 0.005367)$$

Goodness of fit:

SSE: 1.22e-05

R-square: 0.8957

Adjusted R-square: 0.8936

RMSE: 0.0004991

Saturation at 0.2 M **3a** and possible inhibition of catalyst with nucleophile is observed. While bi-reactant inhibition models do not provide a sufficient level of resolution into the specific mechanism at play, the downward trajectory of the rate versus concentration plot is suggestive of possible inhibition of catalyst with nucleophile. This is consistent with previous observations with glycosyl chlorides (see section 9) and consistent with the hypothesis that strong binding of the glycosyl phosphate could mitigate nucleophile inhibition.

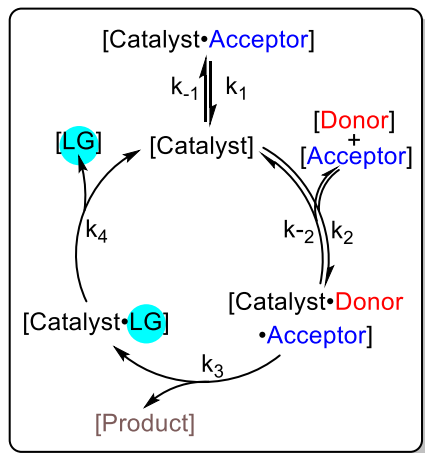

**Figure 2E-b:** Modified catalytic cycle with off-cycle nucleophile inhibition

Saturation kinetics were done with **galactosyl chloride (2b)**, keeping *L*-Ser (**3a**) concentration fixed at 0.2 M and catalyst **1** at 5 mol% (0.005 M).

| [ <b>2b</b> ] (M) | [ <b>3a</b> ] (M) | Time (hr) | Rate (M/hr) |
|-------------------|-------------------|-----------|-------------|
| 0                 | 0.2               | 0.5       | 0.0000      |
| 0                 | 0.2               | 1         | 0.0000      |
| 0                 | 0.2               | 2         | 0.0000      |
| 0.025             | 0.2               | 0.5       | 0.0012      |
| 0.025             | 0.2               | 1         | 0.0016      |
| 0.025             | 0.2               | 1.5       | 0.0018      |
| 0.05              | 0.2               | 0.5       | 0.0021      |
| 0.05              | 0.2               | 1         | 0.0030      |
| 0.05              | 0.2               | 1.5       | 0.0029      |
| 0.075             | 0.2               | 0.5       | 0.0027      |
| 0.075             | 0.2               | 1         | 0.0044      |
| 0.075             | 0.2               | 1.5       | 0.0042      |
| 0.1               | 0.2               | 0.5       | 0.0031      |
| 0.1               | 0.2               | 1         | 0.0058      |
| 0.1               | 0.2               | 2         | 0.0045      |
| 0.125             | 0.2               | 0.5       | 0.0029      |
| 0.125             | 0.2               | 1         | 0.0057      |
| 0.125             | 0.2               | 2         | 0.0060      |
| 0.15              | 0.2               | 0.5       | 0.0039      |
| 0.15              | 0.2               | 1         | 0.0067      |
| 0.15              | 0.2               | 2         | 0.0062      |
| 0.175             | 0.2               | 0.5       | 0.0047      |
| 0.175             | 0.2               | 1         | 0.0070      |
| 0.175             | 0.2               | 2         | 0.0062      |
| 0.2               | 0.2               | 0.5       | 0.0060      |
| 0.2               | 0.2               | 1         | 0.0078      |
| 0.2               | 0.2               | 2         | 0.0067      |

**Table S18.** HPLC data for reaction between galactosyl chloride (**2b**) and *L*-Ser (**3a**), changing concentration in galactosyl chloride (**2b**)

*Note: Time points at 0.5 hours were discarded due to low conversion and unreliable rate calculation. Below is plotted the entire data set with the 0.5 hour time points removed from the fit.*

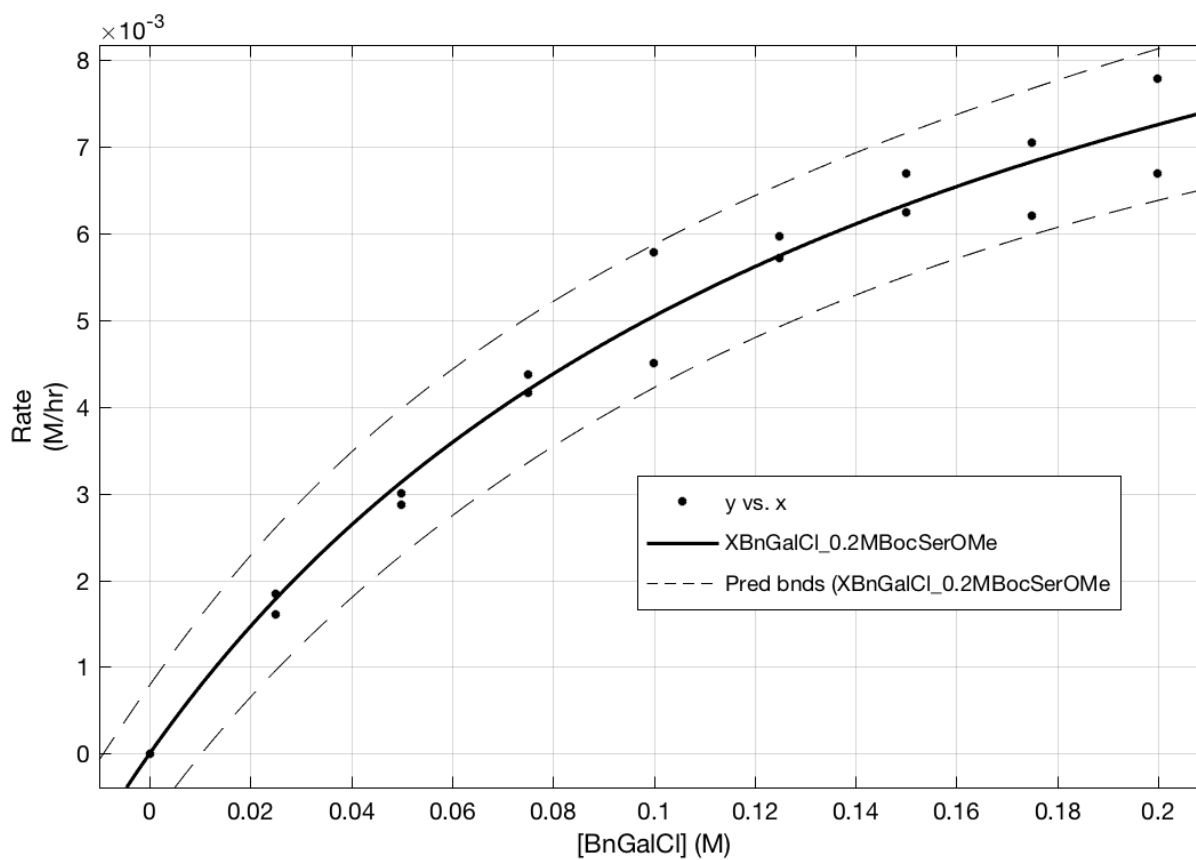

**Figure S14.** HPLC Saturation curve fit to the Michaelis-Menten equation for **changing [2b] (galactosyl chloride)** with 95% confidence bounds

General model:

$$f(x) = V_{\max} * x / (K_m + x)$$

Coefficients (with 95% confidence bounds):

$$K_m = 0.1541 (0.09542, 0.2127)$$

$$V_{\max} = 0.01284 (0.01021, 0.01546)$$

Goodness of fit:

SSE: 2.267e-06

R-square: 0.9808

Adjusted R-square: 0.9797

RMSE: 0.0003651

## 11. Competition Experiment with Galactosyl Chloride (2b) and Galactosyl Phosphate (2a)

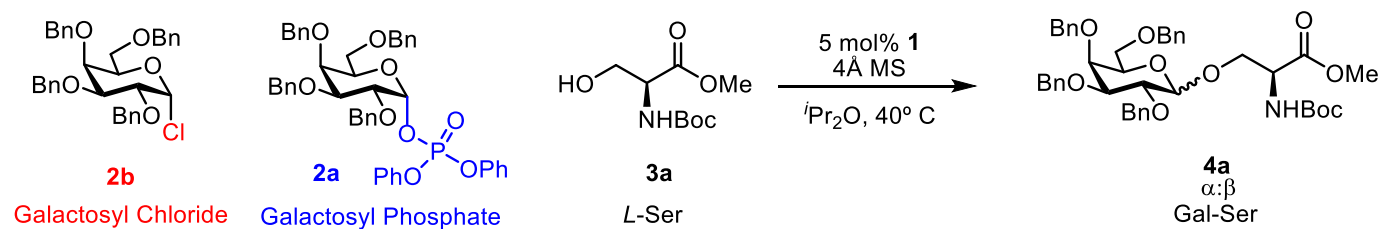

**Scheme S12.** Competition experiment between galactosyl chloride (**2b**) and galactosyl phosphate (**2a**) with *L*-Ser (**3a**)

NMR of T=0 control sample:

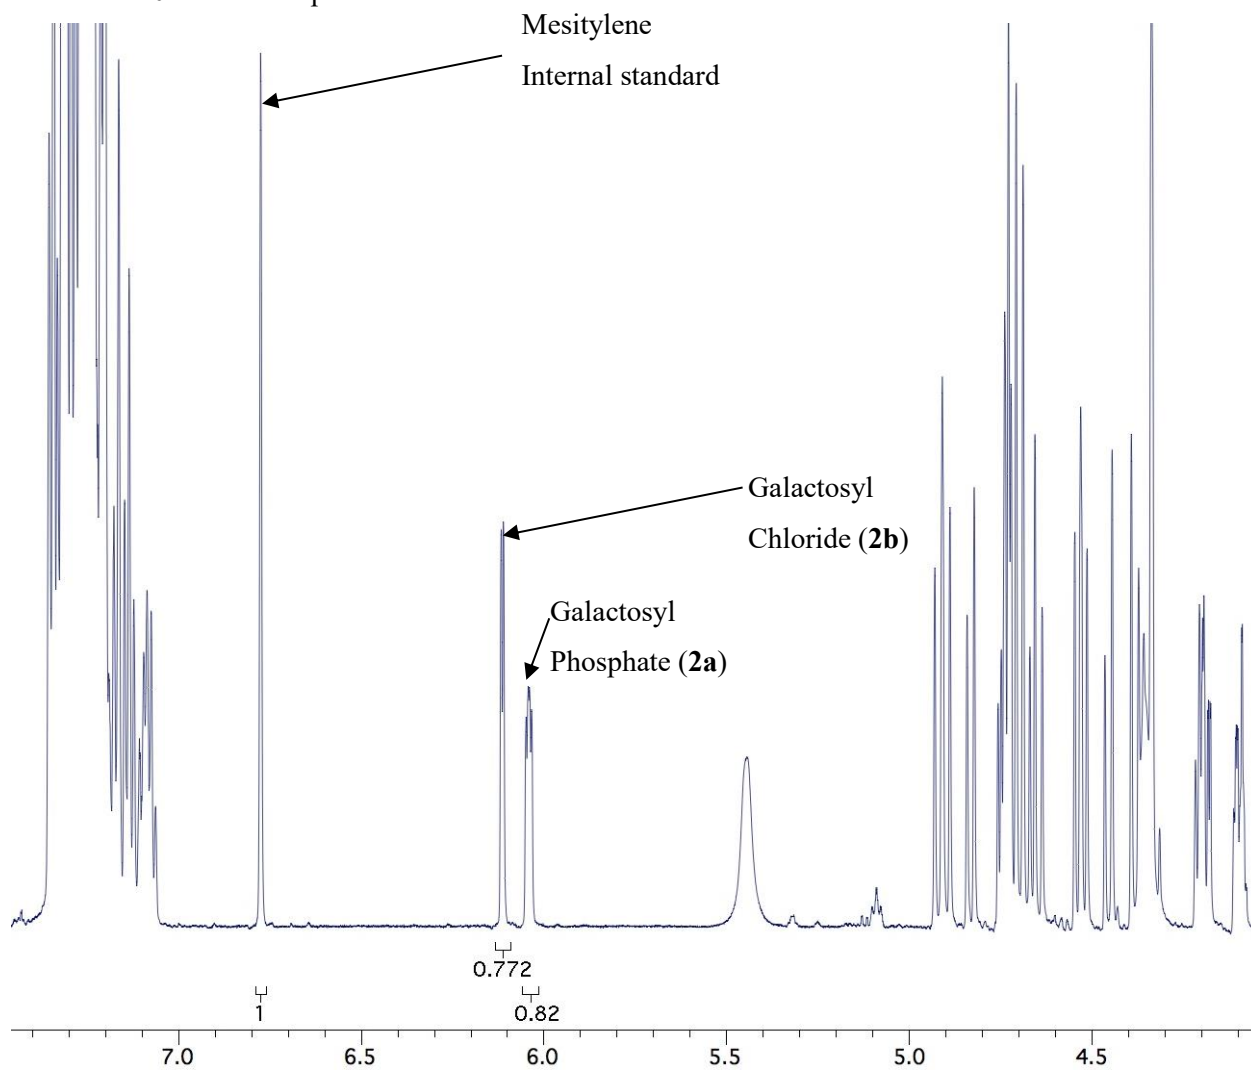

**Figure S15.** NMR of T=0 sample for competition experiment between galactosyl chloride (**2b**) and galactosyl phosphate (**2a**) with *L*-Ser (**3a**)

**General procedure:** Two oven-dry 0.5 dram vials were set up according to the general procedure, instead run at 0.02 mmol scale each. The stock solution with a mixture of galactosyl phosphate (**2a**) and galactosyl chloride (**2b**) was used for both reactions containing mesitylene as an NMR internal standard. The reaction was started upon addition of catalyst solution (40  $\mu$ L, 5 mol%) through the septum to the stirring, equilibrated, reaction mixture in the first vial, while 40  $\mu$ L diisopropyl ether was added to the second vial as a control.

50  $\mu$ L aliquots were taken at 0, 10, 20, and 30 minutes from both catalyzed and control vials. These aliquots were diluted into 500  $\mu$ L CDCl<sub>3</sub>, which had previously been shown to completely stop the reaction. The diluted aliquots were filtered, and NMR spectra were immediately acquired without removing residual solvent from the reaction. The spectral window was 4 ppm to 8 ppm (to avoid diisopropyl ether signals).

The NMR data were processed with a standard baseline correction in iNMR and integrated. The raw data were reprocessed and integrated two times to provide the following data:

| Time (hour) | IS | <b>2b</b> (control) | <b>2a</b> (control) | <b>2b</b> (cat) | <b>2a</b> (cat) |
|-------------|----|---------------------|---------------------|-----------------|-----------------|
| 0.000       | 1  | 0.765               | 0.811               | 0.761           | 0.811           |
| 0.167       | 1  | 0.764               | 0.808               | 0.761           | 0.761           |
| 0.333       | 1  | 0.768               | 0.816               | 0.764           | 0.717           |
| 0.500       | 1  | 0.768               | 0.816               | 0.771           | 0.691           |

| Time (hour) | IS | <b>2b</b> (control) | <b>2a</b> (control) | <b>2b</b> (cat) | <b>2a</b> (cat) |
|-------------|----|---------------------|---------------------|-----------------|-----------------|
| 0.00        | 1  | 0.760               | 0.804               | 0.762           | 0.811           |
| 0.167       | 1  | 0.760               | 0.807               | 0.767           | 0.765           |
| 0.333       | 1  | 0.766               | 0.815               | 0.769           | 0.724           |
| 0.500       | 1  | 0.773               | 0.817               | 0.778           | 0.692           |

**Table S19.** NMR of T=0 sample for competition experiment between galactosyl chloride (**2b**) and galactosyl phosphate (**2a**) with *L*-Ser (**3a**)

These data were converted into concentrations by assuming the control starting concentration of galactosyl phosphate (**2a**) = 0.1 M.

The concentration of each glycosyl donor was monitored by subtracting the catalyzed concentration of each reactant from the uncatalyzed reaction concentrations (at each time point).



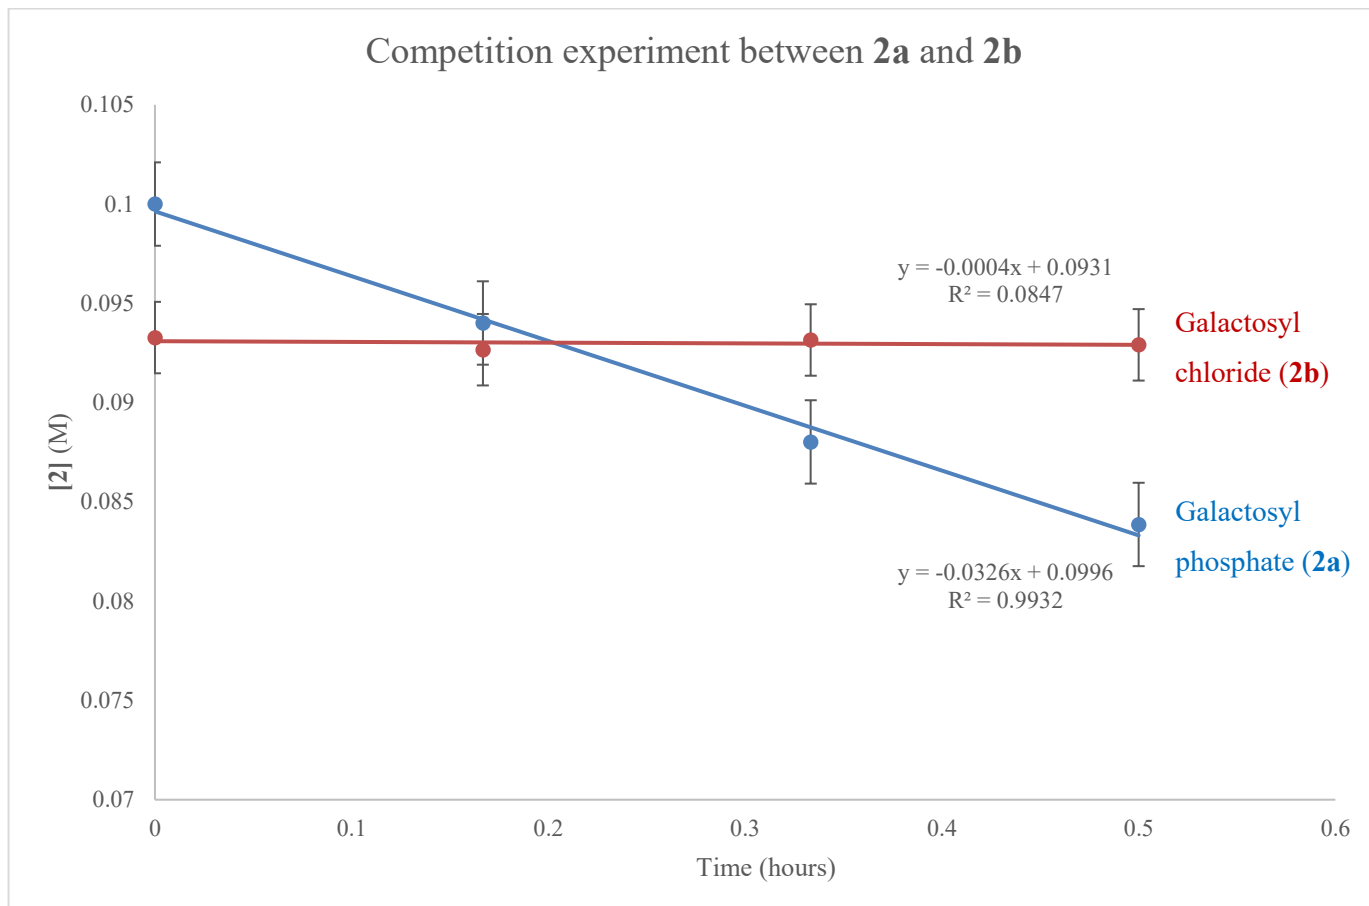

**Figure S16.** Concentration versus time plot for competition experiment between galactosyl phosphate (**2a**) and galactosyl chloride (**2b**) with *L*-Ser (**3a**)

The [**2b**] does not change relative to the background reaction (within the error of the experiment). However, over the course of 30 minutes **2a** reacts to 15% conversion.

By overlaying the competitive phosphate concentration versus time with its independently determined rate by HPLC, no noticeable difference in rate is observed between the two.

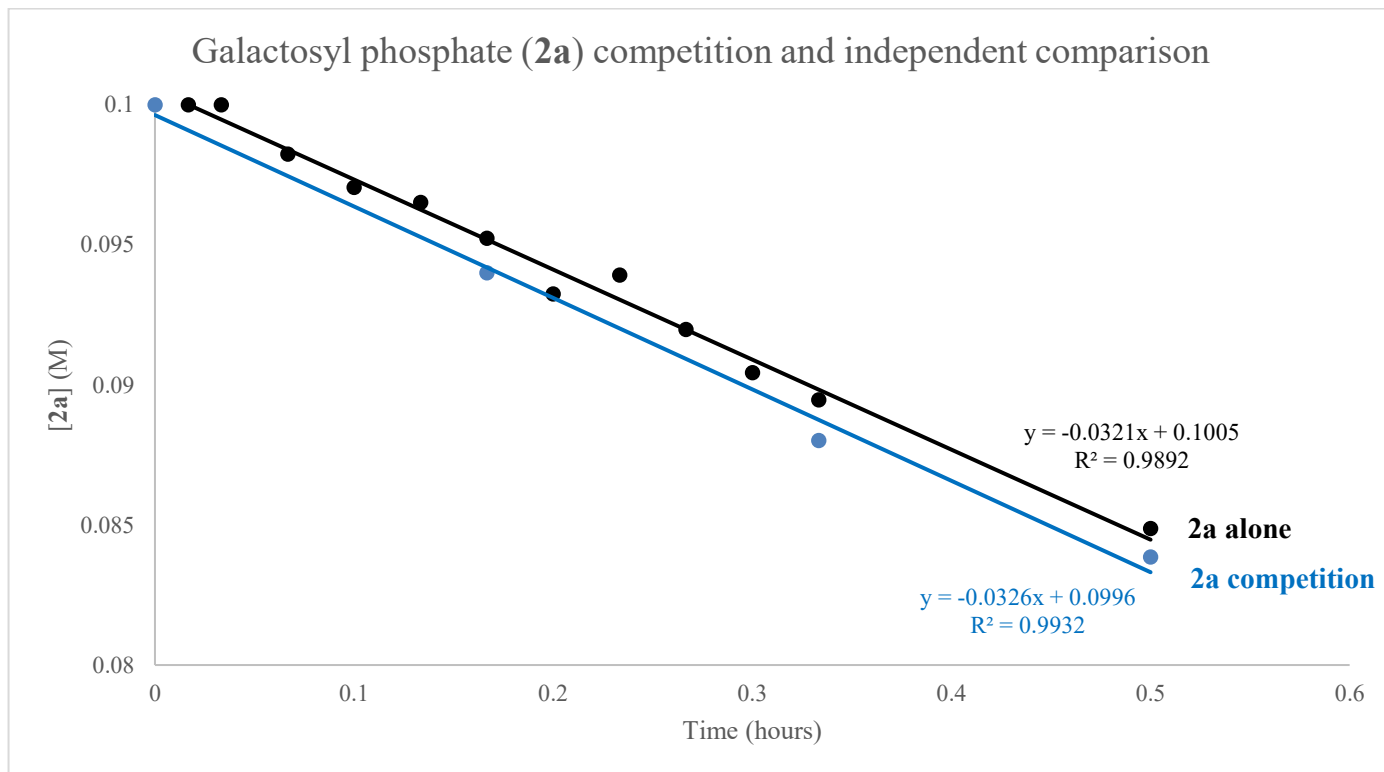

**Figure S17.** Concentration versus time plot for competition experiment between galactosyl phosphate (**2a**) and galactosyl chloride (**2b**) with *L*-Ser (**3a**) overlaid with standard reaction profile for **2a**

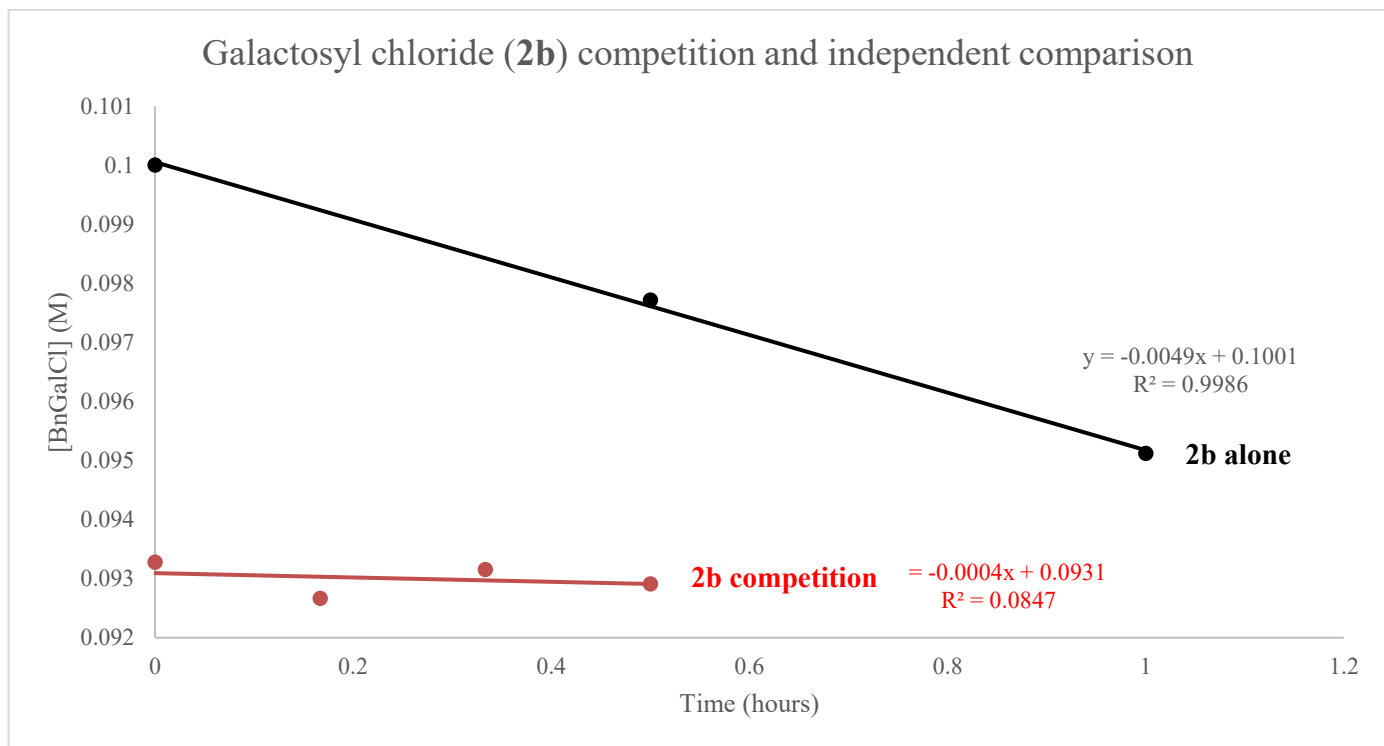

**Figure S18.** Concentration versus time plot for competition experiment between galactosyl phosphate (**2a**) and galactosyl chloride (**2b**) with *L*-Ser (**3a**) overlaid with standard reaction profile for **2b**

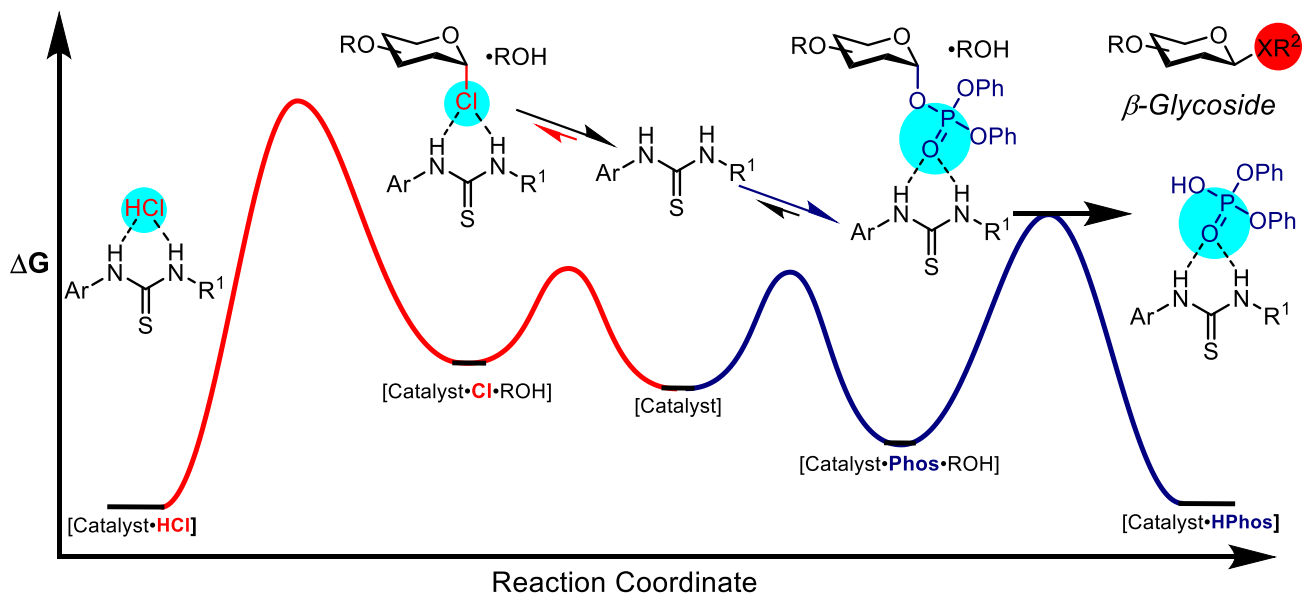

**Scheme S13.** Reaction coordinate interpretation of competition experiment results

We hypothesize the reduced rate of the chloride in the competitive reaction comes from sequestration of catalyst **1** as the complex with galactosyl phosphate (**2a**) as **Catalyst•Phos**. This effectively inhibits reactivity with galactosyl chloride (**2b**). As shown in Figure S17, the phosphate competitive rate is the same as the normal initial rate, suggesting the galactosyl chloride does not inhibit the galactosyl phosphate.

## 12. Substrate binding experiments

### 12.1 Galactosyl Phosphate (2a) Binding with Catalyst 1

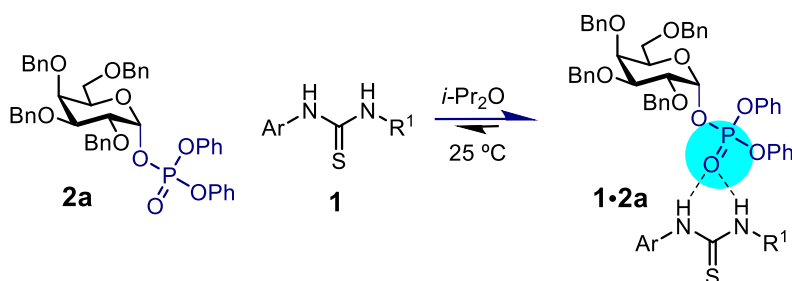

**Scheme S14.** Equilibrium binding of galactosyl phosphate (**2a**) with catalyst **1**

*Note: all stock solutions were prepared using volumetric flasks.*

**General Procedure:** To an NMR tube was added 312.5  $\mu\text{L}$   $i\text{Pr}_2\text{O}$  (sure/seal, Aldrich), 80  $\mu\text{L}$  of a 0.025 M solution of catalyst **1** in  $i\text{Pr}_2\text{O}$ . To this was added a sealed capillary insert containing  $\text{CDCl}_3$  with 1,2-difluorobenzene and triphenylphosphine. At 25  $^\circ\text{C}$ ,  $^{19}\text{F}$  NMR was taken (without any galactosyl phosphate). No shimming was performed prior to acquisition.

To this mixture was titrated a 0.167 M solution of galactosyl phosphate (**2a**). The solution of **2a** was added via syringe followed by vigorous shaking prior to NMR acquisition.

The  $^{19}\text{F}$  NMR spectra were referenced to difluorobenzene (DFB), which was arbitrarily set to 0.000 ppm and the corresponding catalyst fluorine peaks were recorded. For galactosyl phosphate (**2a**), the (bis)trifluoromethyl arene fluorine atoms were used to determine the binding constant (see arrows below).

| Equiv. <b>2a</b> | $^{19}\text{F}$ (ppm) | DBF (ppm) | [ <b>1</b> ] (mM) | [ <b>2a</b> ] (mM) | $\Delta$ ppm |
|------------------|-----------------------|-----------|-------------------|--------------------|--------------|
| 0                | 75.397                | 0.000     | 6.40              | 0.00               | 0.000        |
| 0.5              | 75.439                | 0.000     | 6.25              | 3.13               | 0.028        |
| 1                | 75.481                | 0.000     | 6.11              | 6.11               | 0.078        |
| 2                | 75.497                | 0.000     | 5.84              | 11.68              | 0.114        |
| 4                | 75.534                | 0.000     | 5.37              | 21.48              | 0.173        |
| 8                | 75.568                | 0.000     | 4.62              | 36.99              | 0.228        |
| 16               | 75.592                | 0.000     | 3.62              | 57.92              | 0.272        |
| 24               | 75.605                | 0.000     | 2.97              | 71.38              | 0.3035       |
| 32               | 75.614                | 0.000     | 2.52              | 80.76              | 0.315        |

**Table S20.**  $^{19}\text{F}$  chemical shift data of catalyst **1** with titration of **2a**

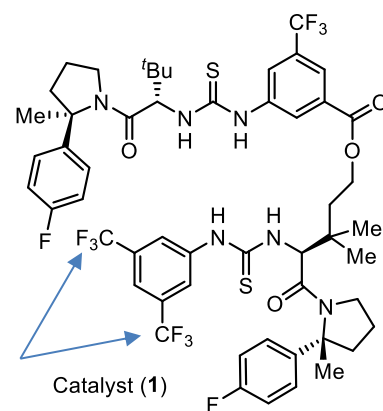

The following derivation was used for obtaining the association constants from the above chemical shift data.

$$K_a = \frac{[\mathbf{1} \cdot \mathbf{2a}]}{[\mathbf{1}][\mathbf{2a}]} \quad (2)$$

$$[\mathbf{1} \cdot \mathbf{2a}] = K_a [\mathbf{1}][\mathbf{2a}] \quad (3)$$

$$[\mathbf{2a}]_o = [\mathbf{1} \cdot \mathbf{2a}] + [\mathbf{2a}] \quad (4)$$

$$[\mathbf{1}]_o = [\mathbf{1} \cdot \mathbf{2a}] + [\mathbf{1}] \quad (5)$$

$$[\mathbf{1} \cdot \mathbf{2a}] = K_a ([\mathbf{1}]_o - [\mathbf{1} \cdot \mathbf{2a}])([\mathbf{2a}]_o - [\mathbf{1} \cdot \mathbf{2a}]) \quad (6)$$

$$[\mathbf{1} \cdot \mathbf{2a}] = \frac{1}{2} \left( [\mathbf{1}]_o + [\mathbf{2a}]_o + \frac{1}{K_a} \right) - \sqrt{\left( [\mathbf{1}]_o + [\mathbf{2a}]_o + \frac{1}{K_a} \right)^2 + 4[\mathbf{1}]_o[\mathbf{2a}]_o} \quad (7)$$

$$\Delta\delta_{obs} = \delta_{\mathbf{1}\chi_1} + \delta_{\mathbf{1}\cdot\mathbf{2a}\chi_{\mathbf{1}\cdot\mathbf{2a}}} \quad (8)$$

$$\Delta\delta_{obs} = \delta_{\mathbf{1}} \left( \frac{[\mathbf{1}]_o - [\mathbf{1} \cdot \mathbf{2a}]}{[\mathbf{1}]_o} \right) + \delta_{\mathbf{1}\cdot\mathbf{2a}} \left( \frac{[\mathbf{1} \cdot \mathbf{2a}]}{[\mathbf{1}]_o} \right) \quad (9)$$

$$\Delta\delta_{obs} = \delta_{\mathbf{1}} \left( \frac{[\mathbf{1}]_o - \left( \frac{1}{2} \left( [\mathbf{1}]_o + [\mathbf{1}]_o + \frac{1}{K_a} \right) - \sqrt{\left( [\mathbf{1}]_o + [\mathbf{2a}]_o + \frac{1}{K_a} \right)^2 + 4[\mathbf{1}]_o[\mathbf{2a}]_o} \right)}{[\mathbf{1}]_o} \right) + \delta_{\mathbf{1}\cdot\mathbf{2a}} \left( \frac{\left( \frac{1}{2} \left( [\mathbf{1}]_o + [\mathbf{2a}]_o + \frac{1}{K_a} \right) - \sqrt{\left( [\mathbf{1}]_o + [\mathbf{2a}]_o + \frac{1}{K_a} \right)^2 + 4[\mathbf{1}]_o[\mathbf{2a}]_o} \right)}{[\mathbf{1}]_o} \right) \quad (10)$$

Since a solution of galactosyl phosphate (**2a**) is being added to a solution of catalyst (**1**), the concentration of catalyst decreases in the titration while the galactosyl phosphate concentration increases. This equation is used to express galactosyl phosphate concentration in terms of catalyst concentration to solve for the chemical shift of the **1** • **2a** complex and the equilibrium constant.

$$[\mathbf{2a}]_0 = 133.33 - 20.833[\mathbf{1}]_0 \quad (8)$$

The chemical shift of the catalyst without any galactosyl phosphate in solution was measured (above) to be  $\delta_1 = 75.527$  ppm.

Using Matlab's curve fitting software to solve for  $K_a$  and  $\delta_{1 \cdot 2a}$ , catalyst  $^{19}\text{F}$  chemical shift and  $[\mathbf{1}]_0$  were plotted.

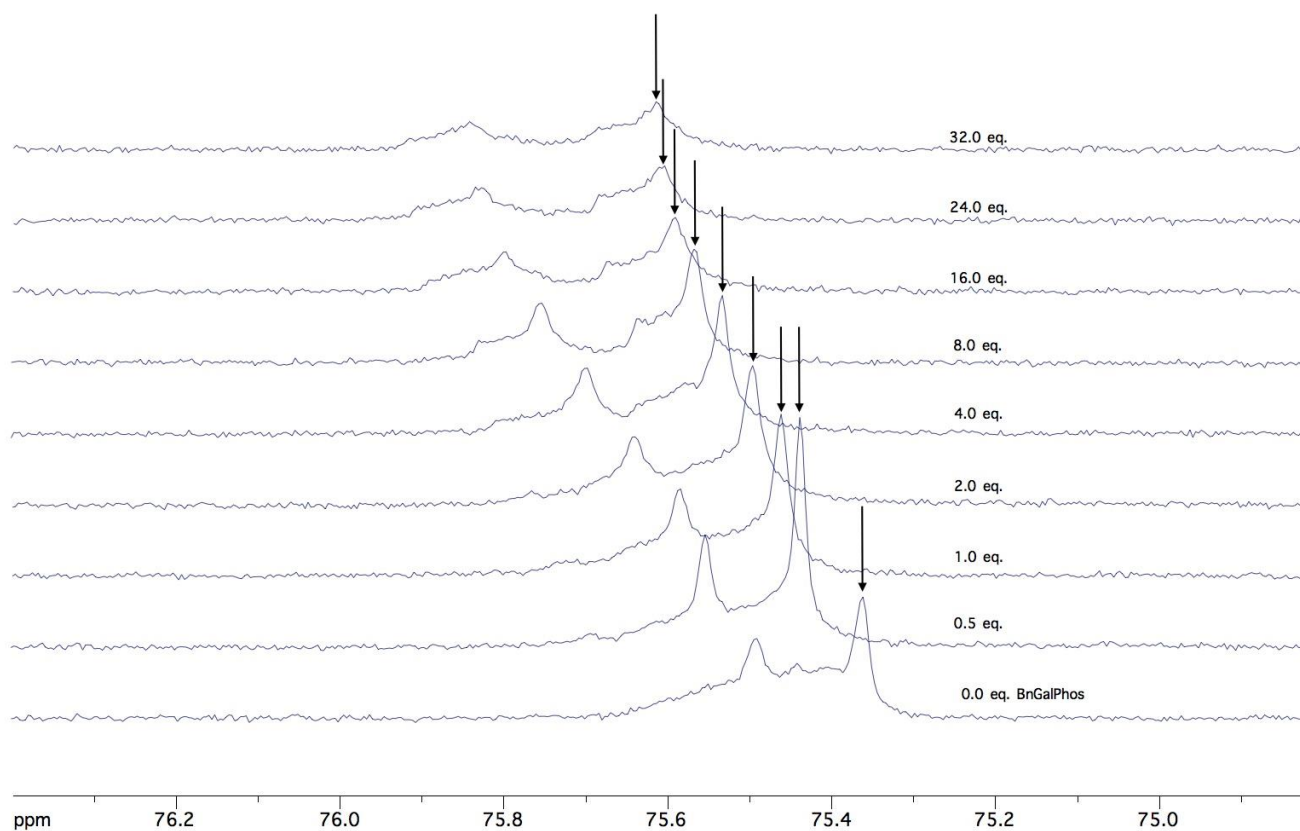

**Figure S19.**  $^{19}\text{F}$  chemical shift data of catalyst **1** with titration of galactosyl phosphate (**2a**). The (bis)-trifluoromethyl peak is shown with increasing equivalents of galactosyl phosphate, ranging from 0.0 eq. to 32.0 eq.

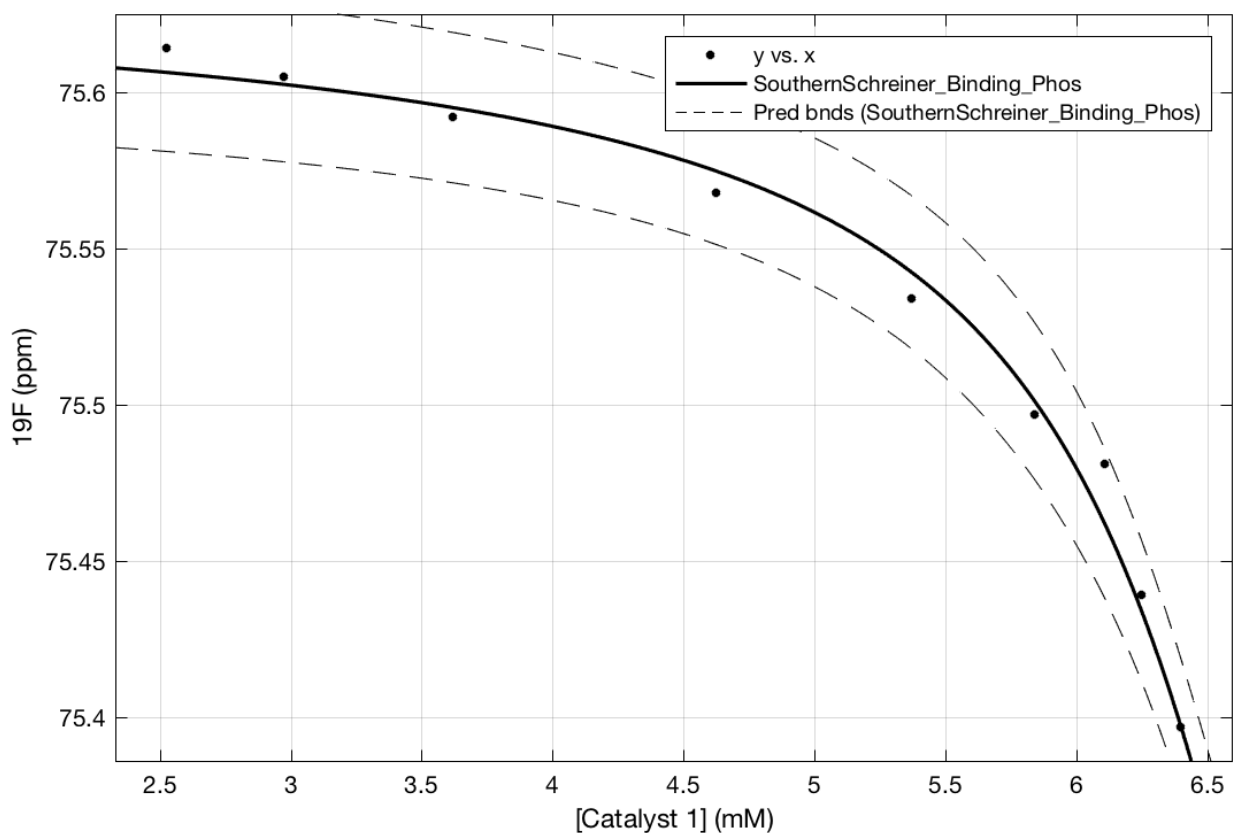

**Figure S20.** <sup>19</sup>F chemical shift data of catalyst **1** plotted against the concentration of galactosyl phosphate (**2a**)

General model:

$$f(x) = 75.3970 * (x - ((1/2) * (x + (-20.833 * x + 133.33) + 1/a - ((x + (-20.833 * x + 133.33) + (1/a))^2 - 4 * (-20.833 * x + 133.33) * x)^{1/2}))) / (x + b * ((1/2) * (x + (-20.833 * x + 133.33) + 1/a - ((x + (-20.833 * x + 133.33) + (1/a))^2 - 4 * (-20.833 * x + 133.33) * x)^{1/2}))) / x$$

Coefficients (with 95% confidence bounds):

$$K_a = 0.08323 \text{ mM}^{-1} (0.04851, 0.1179)$$

$$\delta_{1 \cdot 3a} = 75.64 \text{ ppm} (75.61, 75.66)$$

Goodness of fit:

SSE: 0.000588

R-square: 0.9876

Adjusted R-square: 0.9858

RMSE: 0.009165

These data were then used to calculate the percentage of catalyst bound to **2a** under relevant reaction conditions (0.1 M).

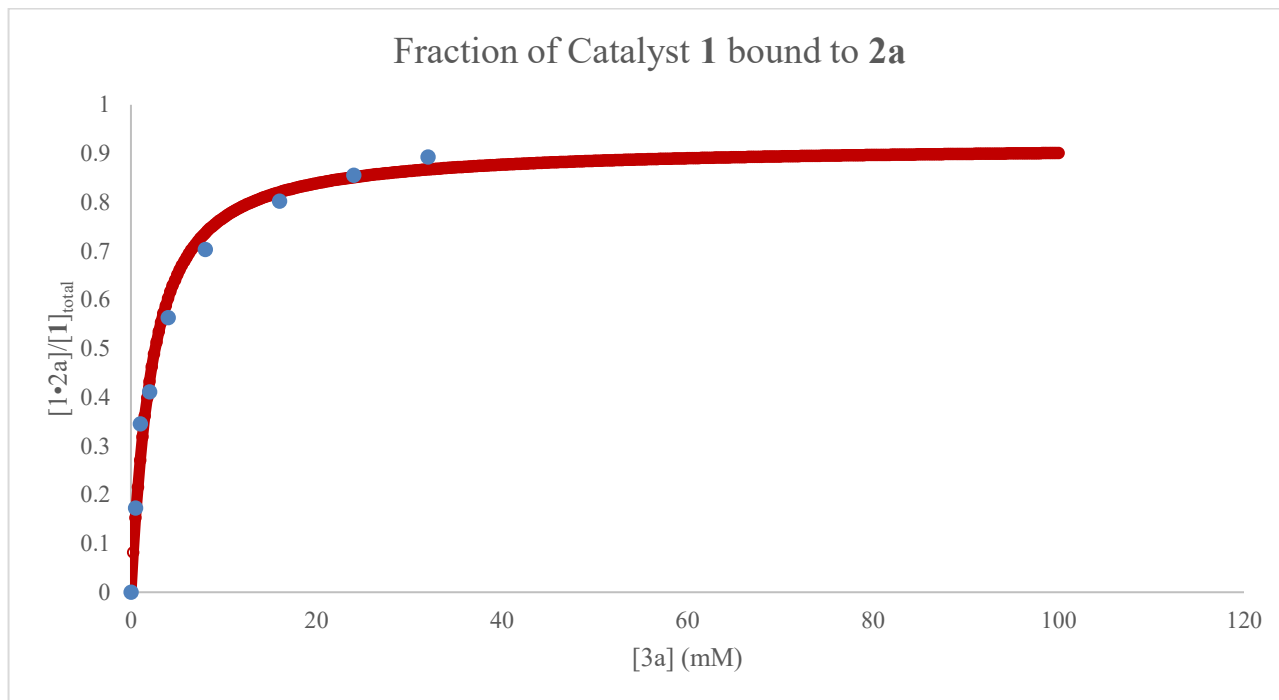

**Figure S21.** Calculated fraction catalyst 1 bound to galactosyl phosphate (**2a**) as a function of [**2a**]

These data suggest that at 0.1 M in **2a** (standard reaction conditions), the catalyst is 84% bound as the 1•2a complex.



## 12.2 Galactosyl Chloride (**2b**) Binding with Catalyst **1**

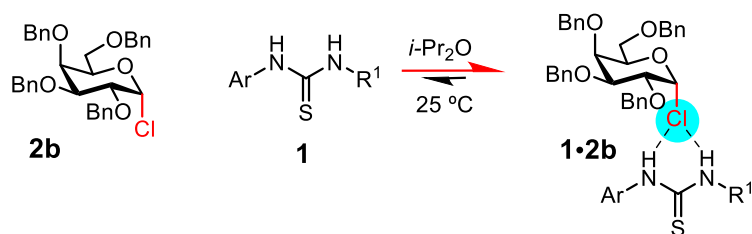

**Scheme S15.** Equilibrium binding of galactosyl chloride (**2b**) with catalyst **1**

The same procedure and analysis from galactosyl phosphate (**2a**) + catalyst **1** (above) was used for galactosyl chloride (**2b**).

| Equiv. <b>2b</b> | <sup>19</sup> F (ppm) | DBF (ppm) | [ <b>1</b> ] (mM) | [ <b>2b</b> ] (mM) | Δ ppm |
|------------------|-----------------------|-----------|-------------------|--------------------|-------|
| 0                | 75.291                | 0.000     | 6.40              | 0.00               | 0.000 |
| 0.5              | 75.302                | 0.000     | 6.25              | 3.13               | 0.011 |
| 1                | 75.311                | 0.000     | 6.11              | 6.11               | 0.020 |
| 2                | 75.317                | 0.000     | 5.84              | 11.68              | 0.026 |
| 4                | 75.345                | 0.000     | 5.37              | 21.48              | 0.054 |
| 8                | 75.361                | 0.000     | 4.62              | 36.99              | 0.070 |
| 16               | 75.383                | 0.000     | 3.62              | 57.92              | 0.092 |
| 16               | 75.416                | 0.000     | 3.62              | 57.92              | 0.125 |
| 24               | 75.413                | 0.000     | 2.97              | 71.38              | 0.122 |
| 24               | 75.428                | 0.000     | 2.97              | 71.38              | 0.137 |
| 32               | 75.448                | 0.000     | 2.52              | 80.76              | 0.157 |
| 48               | 75.437                | 0.000     | 1.94              | 92.98              | 0.146 |
| 64               | 75.466                | 0.000     | 1.57              | 100.59             | 0.175 |

**Table S21.** <sup>19</sup>F chemical shift data of catalyst **1** with titration of **2b**

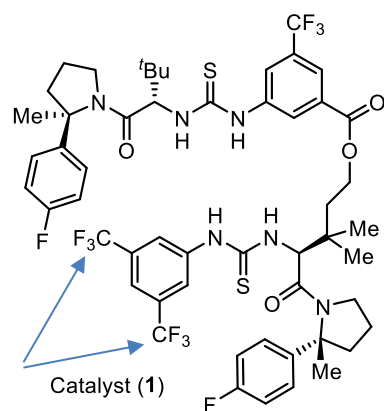

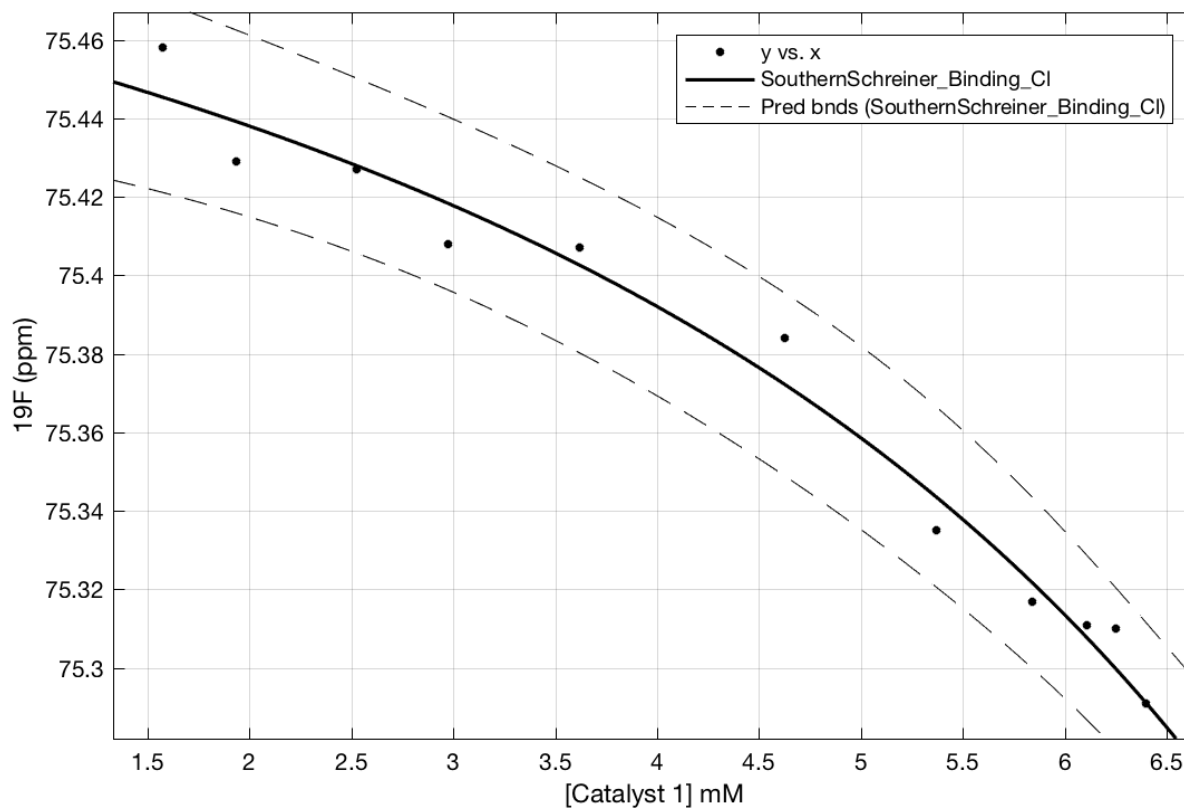

**Figure S22.** <sup>19</sup>F chemical shift data of catalyst **1** plotted against the concentration of galactosyl chloride (**2b**)

General model:

$$f(x) = 75.291 * (x - ((1/2) * (x + (-20.833 * x + 133.33) + 1/a - ((x + (-20.833 * x + 133.33) + (1/a))^2 - 4 * (-20.833 * x + 133.33) * x)^{1/2}))) / x + b * ((1/2) * (x + (-20.833 * x + 133.33) + 1/a - ((x + (-20.833 * x + 133.33) + (1/a))^2 - 4 * (-20.833 * x + 133.33) * x)^{1/2}))) / x$$

Coefficients (with 95% confidence bounds):

$$K_a = 0.004406 \text{ mM}^{-1} (-0.001251, 0.01006)$$

$$\delta_{1.3d} = 75.84 \text{ ppm} (75.31, 76.37)$$

Goodness of fit:

SSE: 0.001208

R-square: 0.9727

Adjusted R-square: 0.9702

RMSE: 0.01048

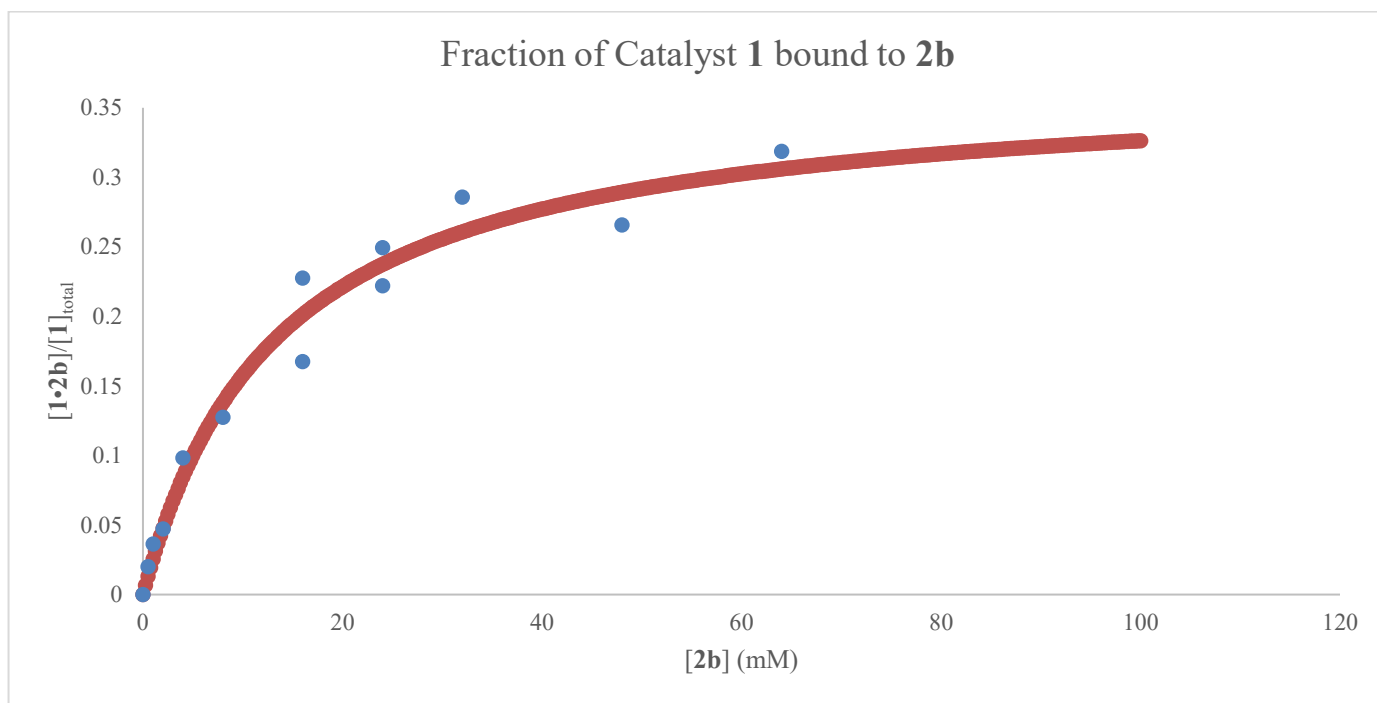

**Figure S23.** Calculated fraction catalyst **1** bound to galactosyl chloride (**2b**) as a function of [**2b**]

### 10.3 *L*-Serine (**3a**) Binding with Catalyst **1**

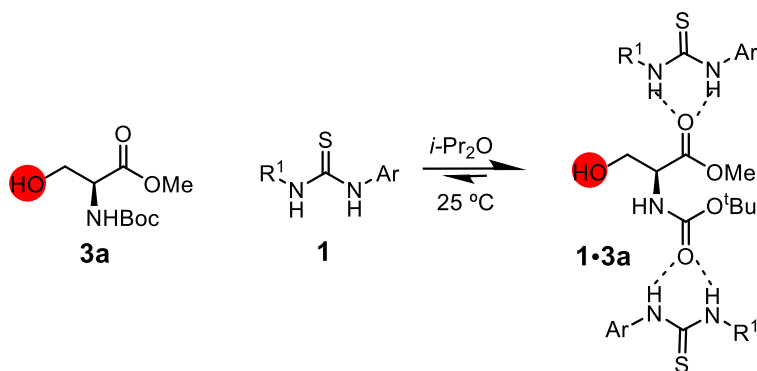

**Scheme S16.** Equilibrium binding of *L*-Serine (**3a**) with catalyst **1**. Shown are potential binding modes

The same procedure and analysis from galactosyl phosphate (**3a**) + catalyst **1** (above) was used for (*L*)-Serine. Instead of a trifluoromethyl group, a *p*-F phenyl peak was used to track chemical shift. The trifluoromethyl groups did not shift sufficiently over the course of the titration for a reliable binding constant to be extracted.

| Equiv. <b>3a</b> | <sup>19</sup> F (ppm) | DFB (ppm) | [ <b>1</b> ] (mM) | [ <b>3a</b> ] (mM) | Δ ppm |
|------------------|-----------------------|-----------|-------------------|--------------------|-------|
| 4                | 20.669                | 0.000     | 6.40              | 0.00               | 0.000 |
| 8                | 20.699                | 0.000     | 5.37              | 21.48              | 0.031 |
| 16               | 20.730                | 0.000     | 4.62              | 36.99              | 0.061 |
| 16               | 20.778                | 0.000     | 3.62              | 57.92              | 0.109 |
| 24               | 20.780                | 0.000     | 2.97              | 71.38              | 0.111 |
| 24               | 20.790                | 0.000     | 2.52              | 80.76              | 0.121 |
| 32               | 20.809                | 0.000     | 1.94              | 92.98              | 0.140 |
| 48               | 20.810                | 0.000     | 1.57              | 100.59             | 0.141 |
| 64               | 20.820                | 0.000     | 1.14              | 109.56             | 0.151 |

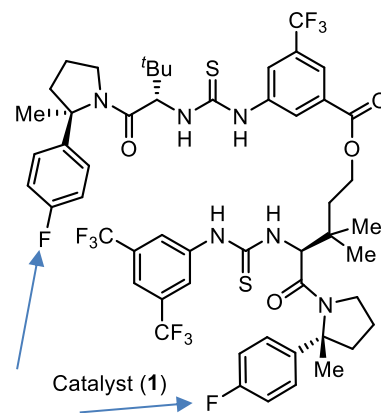

**Table S22.** <sup>19</sup>F chemical shift data of catalyst **1** with titration of **3a**

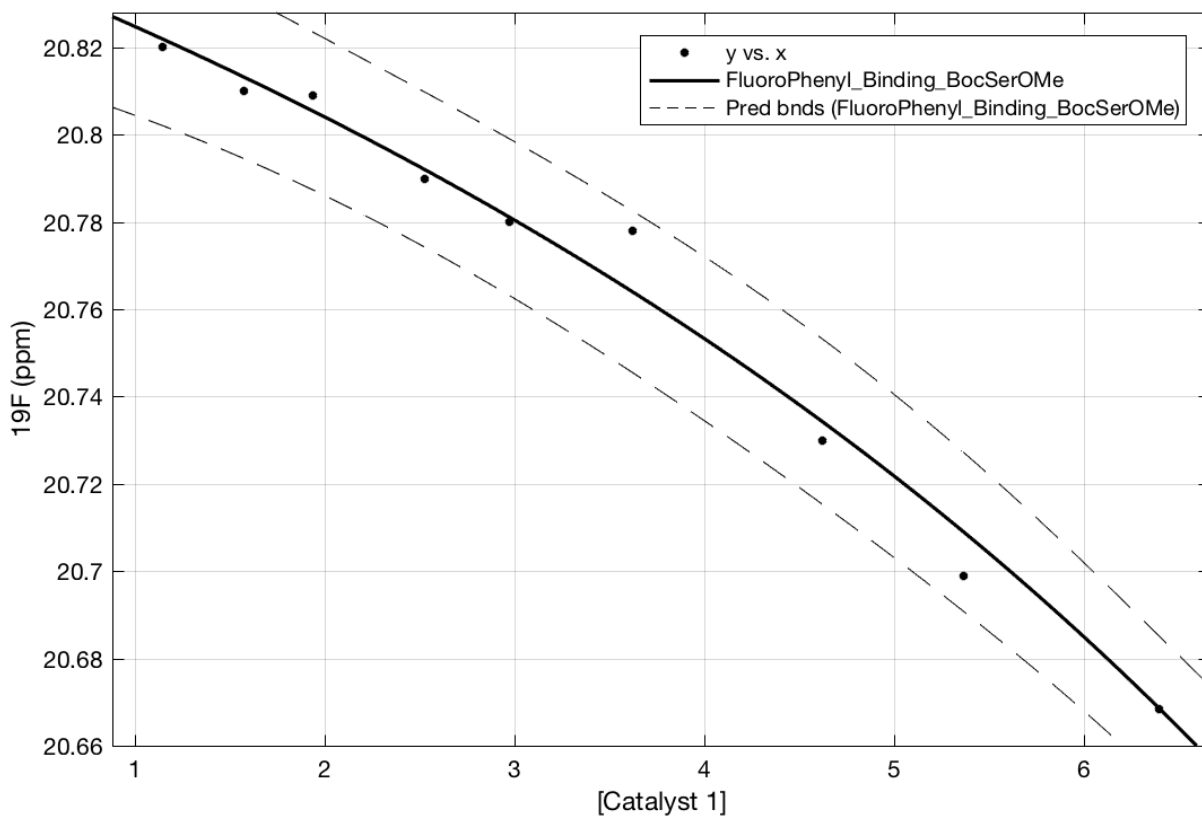

**Figure S24.** <sup>19</sup>F chemical shift data of catalyst **1** plotted against the concentration of *L*-Serine (**3a**)

General model:

$$f(x) = 20.6685 * (x - ((1/2) * (x + (-20.833 * x + 133.33) + 1/a - ((x + (-20.833 * x + 133.33) + (1/a))^{2-4 * (-20.833 * x + 133.33) * x}^{(1/2)}))) / x + b * ((1/2) * (x + (-20.833 * x + 133.33) + 1/a - ((x + (-20.833 * x + 133.33) + (1/a))^{2-4 * (-20.833 * x + 133.33) * x}^{(1/2)}))) / x$$

Coefficients (with 95% confidence bounds):

$$K_a = 0.004587 \text{ } (-3.242e-05, 0.009207)$$

$$\delta_{Cat \cdot Serine} = 21.13 \text{ } (20.8, 21.46)$$

Goodness of fit:

SSE: 0.0003432

R-square: 0.985

Adjusted R-square: 0.9829

RMSE: 0.007002

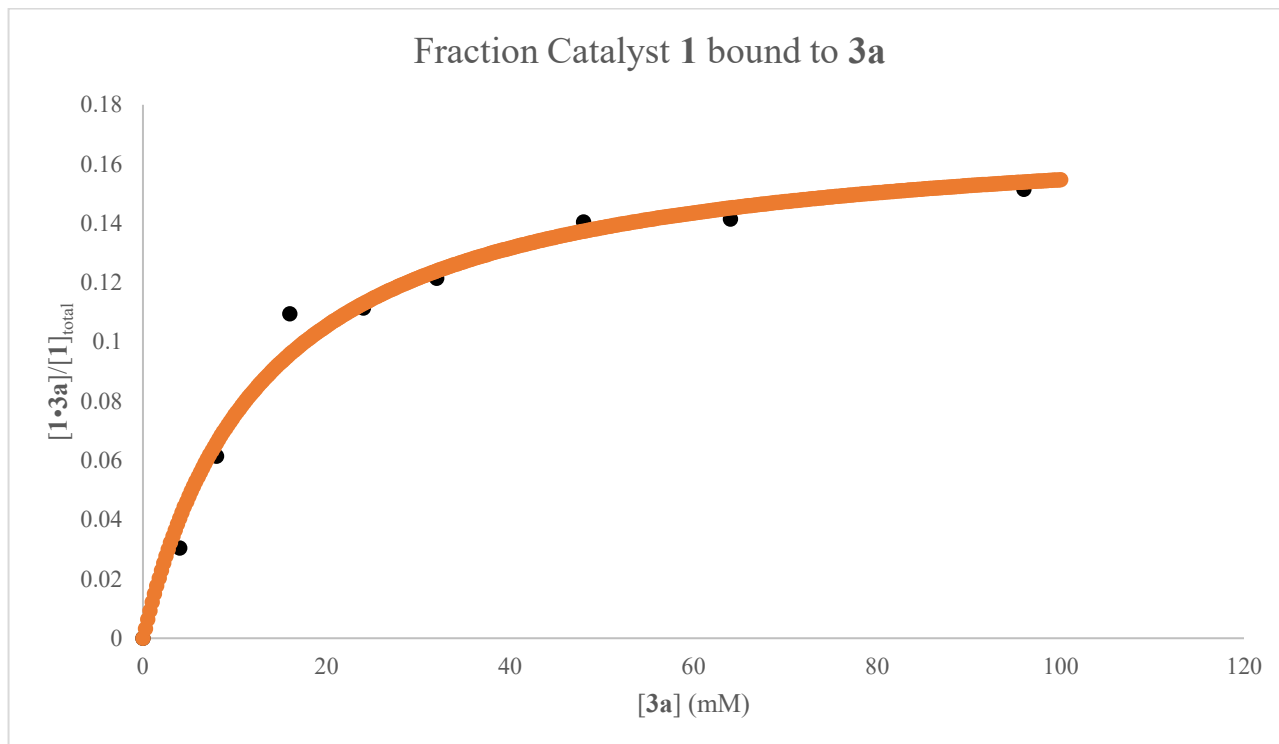

**Figure S25.** Calculated fraction catalyst **1** bound to *L*-Serine (**3a**) as a function of [**3a**]

## 12.3 Leaving Group Binding Study

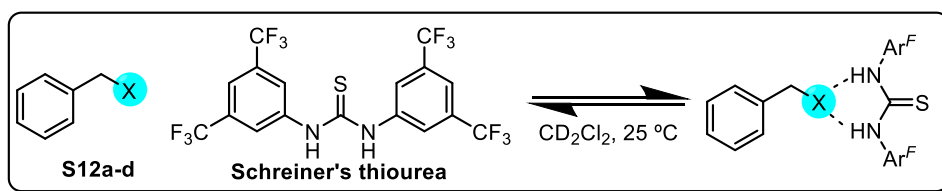

**Figure S26.** Titration of Various Bn-X derivatives with Schreiner's Thiourea as Quantified by  $^1\text{H}$  NMR

| Bn-   | -OPO(OPh) <sub>2</sub> | -OAc       | -Cl        | -ONO <sub>2</sub> |
|-------|------------------------|------------|------------|-------------------|
| equiv | Dexp (ppm)             | Dexp (ppm) | Dexp (ppm) | Dexp (ppm)        |
| 0     | 0.000                  | 0.000      | 0.000      | 0.000             |
| 0.1   | 0.117                  | 0.006      | 0.003      | 0.001             |
| 0.25  | 0.247                  | 0.014      | 0.004      | 0.001             |
| 0.5   | 0.488                  | 0.025      | 0.000      | 0.001             |
| 1     | 0.816                  | 0.051      | -0.001     | 0.002             |
| 2.5   | 1.251                  | 0.120      | 0.005      | 0.021             |
| 5     | 1.410                  | 0.217      | 0.004      | 0.011             |
| 10    | 1.510                  | 0.359      | 0.013      | 0.019             |
| 25    | 1.637                  | 0.620      | 0.026      | 0.046             |
| 50    | 1.698                  | 0.987      |            | 0.086             |
| 100   |                        | 1.091      | 0.044      |                   |

**Table S23.** Chemical shift data ( $^1\text{H}$  NMR) for titration of **S12a-d** to 1 equiv. **Schreiner's thiourea**

A modified form of equation 10 was used for the binding study of Schreiner's thiourea with 2a-d and is shown below (11). In every case, Schreiner's thiourea is at 0.01 M.

$$\Delta\delta_{obs} = \delta_{1\cdot3a} \left( \frac{\left( \frac{1}{2} \left( 0.01 + [\text{S12}]_o + \frac{1}{K_a} \right) - \sqrt{\left( 0.01 + [\text{S12}]_o + \frac{1}{K_a} \right)^2 + 4(0.01)[\text{S12}]_o} \right)}{0.01} \right) \quad (11)$$

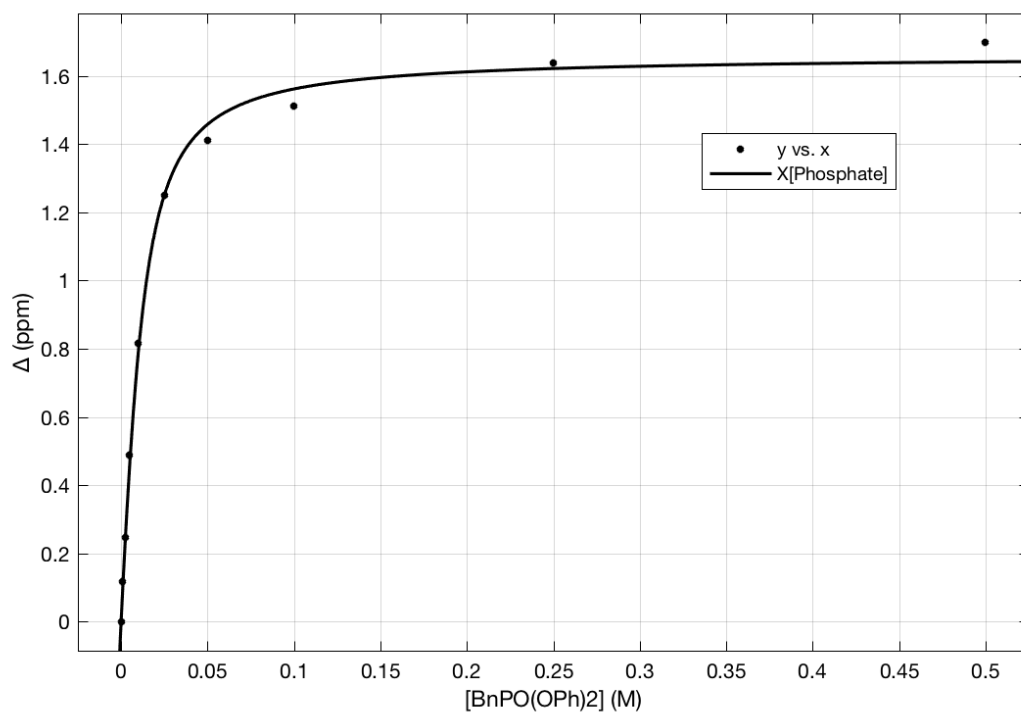

**Figure S27.** Titration of benzyl diphenyl phosphate (**S12a**) to **Schreiner's thiourea**

General model:

$$f(x) = d * (((0.01+x+(1/Ka)) - ((0.01+x+(1/Ka))^2 - (4*0.01*x))^{(1/2)}) / (2*0.01))$$

Coefficients (with 95% confidence bounds):

$$K_a = 174.9 \text{ M}^{-1} (135.3, 214.6)$$

$$d = 1.66 \text{ ppm} (1.608, 1.712)$$

Goodness of fit:

SSE: 0.009806

R-square: 0.9975

Adjusted R-square: 0.9972

RMSE: 0.03501



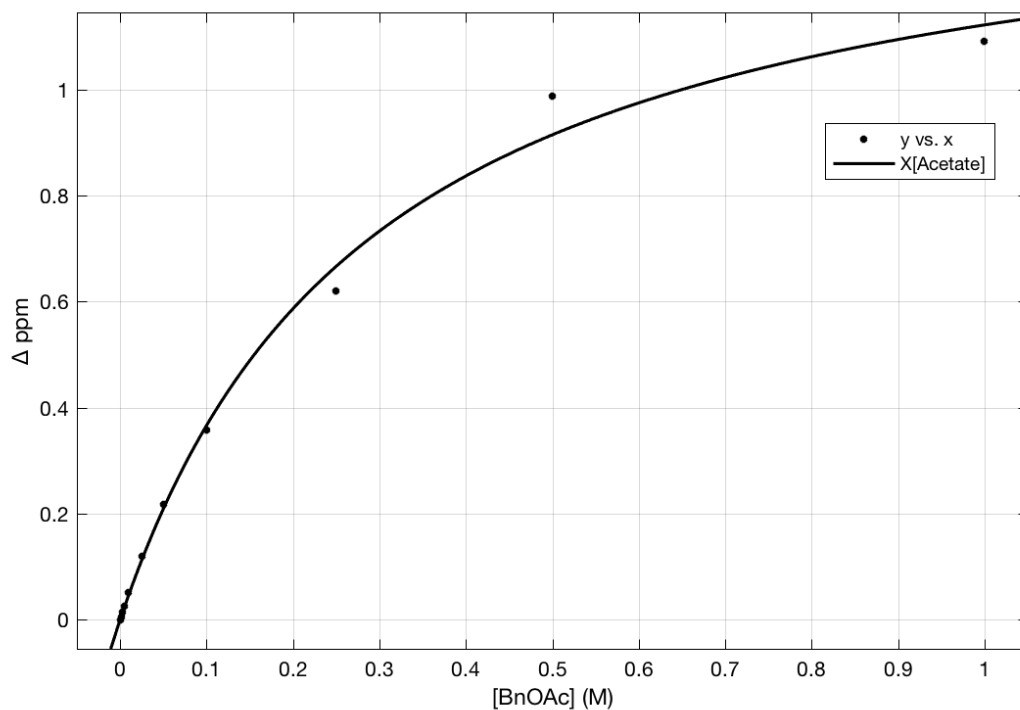

**Figure S28.** Titration of benzyl acetate (S12b) to Schreiner's thiourea

General model:

$$f(x) = b * ((1/2) * (x + (0.01) + 1/Ka) - ((x + (0.01) + (1/Ka))^2 - 4 * (0.01) * x)^{1/2}) / 0.01$$

Coefficients (with 95% confidence bounds):

$$Ka = 3.485 (2.564, 4.405)$$

$$b = 1.447 (1.297, 1.596)$$

Goodness of fit:

SSE: 0.008561

R-square: 0.9948

Adjusted R-square: 0.9942

RMSE: 0.03084

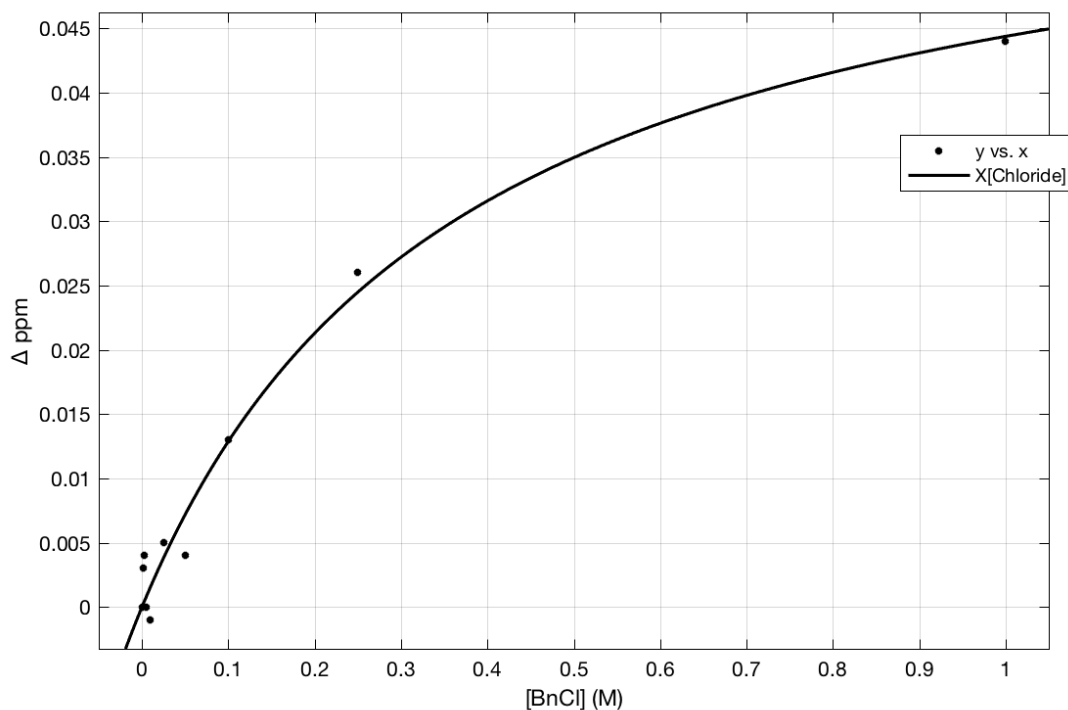

**Figure S29.** Titration of benzyl chloride (S12d) to Schreiner's thiourea

General model:

$$f(x) = d * (((0.01+x+(1/Ka)) - ((0.01+x+(1/Ka))^2 - (4*0.01*x))^{1/2}) / (2*0.01))$$

Coefficients (with 95% confidence bounds):

$$K_a = 2.759 \text{ M}^{-1} (1.255, 4.262)$$

$$d = 0.06059 \text{ ppm} (0.04662, 0.07457)$$

Goodness of fit:

SSE: 4.233e-05

R-square: 0.9776

Adjusted R-square: 0.9748

RMSE: 0.0023

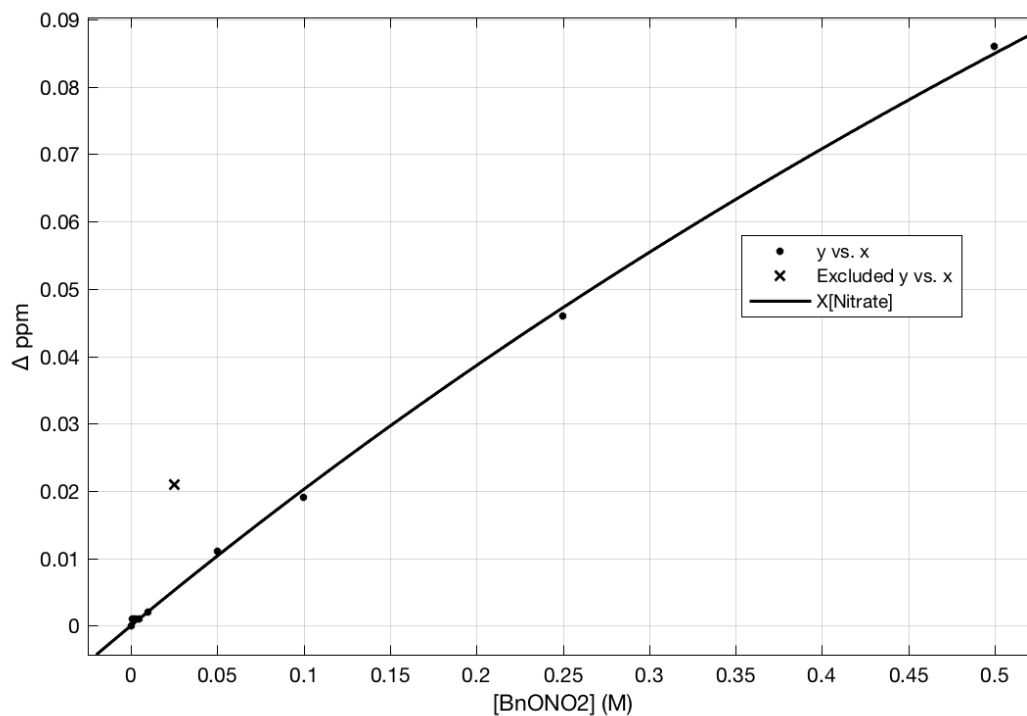

**Figure S30.** Titration of benzyl nitrate (S12c) to Schreiner's thiourea

General model:

$$f(x) = b * ((1/2) * (x + (0.01) + 1/Ka) - ((x + (0.01) + (1/Ka))^2 - 4 * (0.01) * x)^{1/2}) / 0.01$$

Coefficients (with 95% confidence bounds):

$$Ka = 0.5054 \text{ M}^{-1} (0.2854, 0.7254)$$

$$b = 0.4225 \text{ ppm} (0.2706, 0.5743)$$

Goodness of fit:

SSE: 5.333e-06

R-square: 0.9992

Adjusted R-square: 0.9991

RMSE: 0.0008729

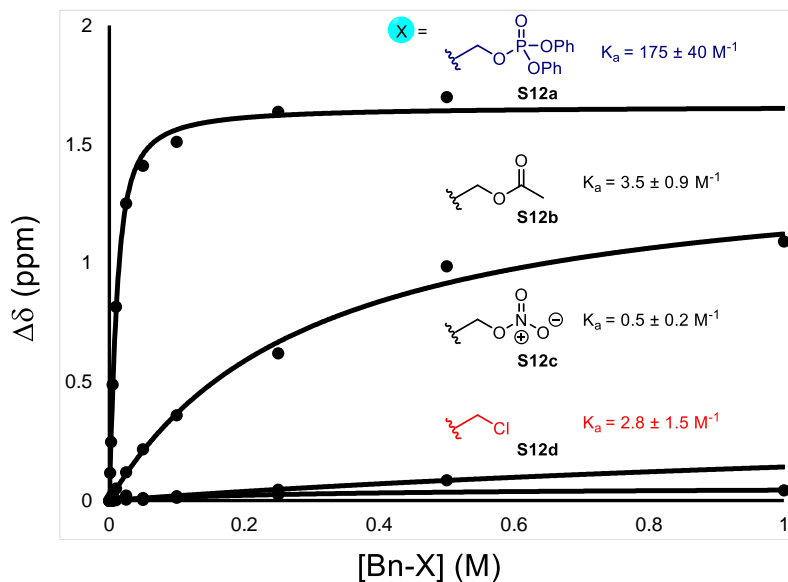

**Figure S31.** Titration of various Bn-X derivatives with Schreiner's Thiourea as quantified by  $^1\text{H}$  NMR

Note: These values were collected, analyzed, and reported by Andreas Rötheli and is reported in his thesis.<sup>23</sup>

(1) Pangborn AB, Giardello MA, Grubbs RH, Rosen RK, Timmers FJ (1996) Safe and convenient procedure for solvent purification. *Organometallics* 15:1518–1520.

(2) Kennedy CR, Lehnerr D, Rajapaksa NS, Ford DD, Park Y, Jacobsen EN (2016) Mechanism-guided development of a highly active bis-thiourea catalyst for anion-abstraction catalysis. *J Am Chem Soc* 138:13525–13528.

(3) Sabesan S, Neira S (1992) Synthesis of glycosyl phosphates and azides. *Carbohydr Res* 223:169–185.

(4) Park Y, Harper KC, Kuhl N, Kwan EE, Liu RY, Jacobsen EN (2017) Macrocyclic bis-thioureas catalyze stereospecific glycosylation reactions. *Science* 355:162–166.

(5) Marra A, Shun LKS, Gauffeny F, Sinaÿ P (1990) Anomeric *S*-xanthates of 2-azido-2-deoxy-D-galactopyranosyl derivatives as efficient glycosyl donors. *Synlett* 445–448.

(6) Tsuda T, Nakamura S, Hashimoto S (2004) A highly stereoselective construction of 1,2-*trans*- $\beta$ -glycosidic linkages capitalizing on 2-azido-2-deoxy-D-glycosyl diphenyl phosphates as glycosyl donors. *Tetrahedron* 60:10711–10737.

(7) Ding W, Zhang J, Yao Z, Lu R, Wu D, Li G, Shen Z, Sun Y, Lin G, Wang C, Zhao M, Peng S (2004) The synthesis, distribution, and anti-hepatic cancer activity of YSL. *Bioorg Med Chem* 12:4989–4994.

(8) Li ZF, Guo ZF, Yan H, Lu ZL, Wu DY (2012) The development and SAR of pyrrolidine carboxamide 11 $\beta$ -HSD1 inhibitors. *Bioorg Med Chem* 20:2897–2902.

(9) Pelletier G, Zwicker A, Allen CL, Schepartz A, Miller SJ (2016) Aqueous glycosylation of unprotected sucrose employing glycosyl fluorides in the presence of calcium ion and triethylamine. *J Am Chem Soc* 138:3175–3182.

(10) Wu J, Liu P, Wang L, Tian H, Wang Q, Zhang S (2011) Synthesis and application of clindamycin succinate as a novel chiral selector for capillary electrophoresis. *J Sep Sci* 34:2455–2462.

(11) He H, Zhu X (2014) Thioperoxide-mediated activation of thioglycoside donors. *Org Lett* 16:3102–3105.

(12) Chu AHA, Minciunescu A, Bennett CS (2015) Aryl(trifluoroethyl)iodonium triflimide and nitrile solvent systems: a combination for the stereoselective synthesis of armed 1,2-*trans*- $\beta$ -glycosides at noncryogenic temperatures. *Org Lett* 17:6262–6265.

(13) Sakamoto I, Ohri H (2014) Practical synthesis of the disaccharide epitope, D-galactopyranosyl- $\alpha$ -1,3-D-galactopyranose, by using 1,2;5,6-di-*O*-cyclohexylidene- $\alpha$ -D-galactofuranose as the glycosyl acceptor. *Bioscience, Biotechnology, and Biochemistry* 64:1974–1977.

- (14) Kitowski A, Jiménez-Moreno E, Salvado M, Mestre J, Castilloñ S, Jiménez-Oseś G, Boutureira O, Bernardes GJL (2017) Oxidative activation of C-S bonds with an electropositive nitrogen promotor enables orthogonal glycosylation of alkyl over phenyl thioglycosides. *Org Lett* 19:5490-5493.
- (15) Jiang R, Zong G, Liang X, Jin S, Zhang J, Wang D (2014) Direct 2,3-*O*-isopropylideneation of  $\alpha$ -D-mannopyranosides and the preparation of 3,6-branched mannose trisaccharides. *Molecules* 19:6683-6693.
- (16) Nguyen HM, Poole JL, Gin DY, *Angew Chem Int Ed* 40:414-417.
- (17) Jones S, Selitsianos D, Thompson KJ, Toms SM (2003) An improved method for Lewis acid catalyzed phosphoryl transfer with Ti(*t*-BuO<sub>4</sub>). *J Org Chem* 68:5211-5216.
- (18) Aellig C, Girard C, Hermans I (2011) Aerobic alcohol oxidations mediated by nitric acid. *Angew Chem Int Ed* 50:12355-12360.
- (19) Matlab, Version R2017a (9.2.0556344) maci64, MathWorks, Inc. 2017 (<http://www.mathworks.com/>).
- (20) The PyMOL Molecular Graphics System, PyMOL Version 1.5.0.5 Enhanced for MacOS X, Schrödinger, LLC (<http://www.pymol.org>).
- (21) CYLview, Version 1.0b, C. Y. Legault, Université de Sherbrooke, Sherbrooke QC, 2009 (<http://www.cylview.org/>).
- (22) The PyMOL Molecular Graphics System, PyMOL Version 1.5.0.5 Enhanced for MacOS X, Schrödinger, LLC (<http://www.pymol.org>).
- (23) Rötheli AR (2016) A Mechanistic Approach towards Highly Efficient Anion-Binding Catalysts. Harvard University, Cambridge, MA.
- (24) Gottlieb HE, Kotlyar V, Nudelman A (1997) NMR Chemical Shifts of Common Laboratory Solvents as Trace Impurities. *J Org Chem* 62:7512-7515.
- (25) Crich D, Smith M (2002) Solid-Phase Synthesis of  $\beta$ -Mannosides. *J Am Chem Soc* 124:8867-8869.
- (26) Block K, Pederson C (1974) A Study of <sup>13</sup>C Coupling Constants in Hexopyranoses. *J Chem Soc, Perkin Trans 2* 41:3877-3882.
